# Supplementary material
Source: MDPI journal article supplement (https://www.mdpi.com/2076-3417/10/17/5942)
Supplement: s1 [file s1]

Archive with 4 entries (4 files):
- 1. Initial database. Supplementary material.xls
- 2. Coded database. Supplementary material.xls
- 3. Filtered database. Supplementary material.xls
- 4. Report for physician. Supplementary material.pdf
