# Supplementary material
Source: MDPI journal article supplement (https://www.mdpi.com/2076-3417/10/17/5942)
Supplement: s1 [file s1 › 1. Initial database. Supplementary material.xls]

## Sheet: Data_View
Patient Characterisation Data															Clinical Data: Assessed and Reported Data																			(Rx= Flexo-Extension; Ry= Rotation; Rz= Lateralization)					Clinical Data: Measured Data With Sensors
Identification							Temporary	Anthropometric			Daily Life Activities
	ID	Series	Gender	Age	Educational Level	Dominant Size	Date	Weight	Height	BMI	Workplace	Workplace Intensity	Physical Activity	Physical Activity Intensity	Traffic Accident	Traffic Accident Date	Type of Scope	Head Position Scope	Type of Pain	Pain Periodicity	Feeling of Instability	Contracture	Surgery	Rheumatic Disease	Limitation of Mobility	SHORT Neck	Spinal Column Alterations	Spurling	Distraction	Valsalva	Jackson Compression	Paravertebral Pain	Scale WDQ	Rx.01.Length	Rx.02.Vel	Rx.03.MaxRange	1º Max. Rx	Acoplado Rz	Acoplado Ry	Frame	2º Max. Rx	Acoplado Rz	Acoplado Ry	Frame	3º Max. Rx	Acoplado Rz	Acoplado Ry	Frame	4º Max. Rx
PV001_Serie1	1	1	F	32	Superior	DIESTRO	2017-04-19	59	164	21.9363	Fisioterapeuta	DE PIE	FALSE		FALSE						FALSE	FALSE	FALSE	FALSE	FALSE	FALSE	FALSE	FALSE	FALSE	FALSE	FALSE	FALSE	0	1553.73	73.0137	136.088	76.4013	-0.189129	-5.38368	244	74.9311	4.66077	-1.89362	423	73.3684	0.667532	-2.80838	155	72.6113
PV001_Serie2	1	2	F	32	Superior	DIESTRO	2017-04-19	59	164	21.9363	Fisioterapeuta	DE PIE	FALSE		FALSE						FALSE	FALSE	FALSE	FALSE	FALSE	FALSE	FALSE	FALSE	FALSE	FALSE	FALSE	FALSE	0	1347.92	84.2452	129.752	73.7302	-1.90877	-3.79424	121	73.3793	-0.604915	-4.79812	47	72.2458	1.15756	-3.44119	198	69.8514
PV002_Serie1	2	1	F	22	Superior	DIESTRO	2017-04-19	53	164	19.7055	Fisioterapeuta	DE PIE	TRUE	MODERADO	FALSE				CRONICO (>6 meses desde aparición)	FRECUENTE	FALSE	FALSE	FALSE	FALSE	FALSE	FALSE	FALSE	FALSE	FALSE	FALSE	FALSE	FALSE	0	1581.68	69.1296	135.135	82.9657	10.4227	-9.00143	55	82.7574	9.04938	-4.20595	428	82.5559	9.43272	-7.56559	627	81.2439
PV002_Serie2	2	2	F	22	Superior	DIESTRO	2017-04-19	53	164	19.7055	Fisioterapeuta	DE PIE	TRUE	MODERADO	FALSE				CRONICO (>6 meses desde aparición)	FRECUENTE	FALSE	FALSE	FALSE	FALSE	FALSE	FALSE	FALSE	FALSE	FALSE	FALSE	FALSE	FALSE	0	1637.89	77.5518	139.416	81.6892	13.4468	-4.62368	399	81.617	11.3162	-4.80377	218	81.4126	7.32755	-7.07728	52	81.1982
PV003_Serie1	3	1	F	40	Superior	DIESTRO	2017-04-20	52	159	20.5688	Fisioterapeuta	DE PIE	FALSE		FALSE				CRONICO (>6 meses desde aparición)	FRECUENTE	FALSE	FALSE	FALSE	FALSE	TRUE	FALSE	FALSE	FALSE	FALSE	FALSE	FALSE	FALSE	0	1456.27	41.3713	127.418	66.8491	-3.47065	-1.58179	832	65.0846	-6.22486	-1.79429	418	64.6338	-5.35415	-2.29151	266	64.5918
PV003_Serie2	3	2	F	40	Superior	DIESTRO	2017-04-20	52	159	20.5688	Fisioterapeuta	DE PIE	FALSE		FALSE				CRONICO (>6 meses desde aparición)	FRECUENTE	FALSE	FALSE	FALSE	FALSE	TRUE	FALSE	FALSE	FALSE	FALSE	FALSE	FALSE	FALSE	0	1396.32	42.5187	124.034	69.3839	-5.54654	-2.11921	484	68.1798	-5.34356	-2.89489	895	67.2031	-6.2203	-2.7198	612	66.4154
PV004_Serie1	4	1	F	54	Superior	DIESTRO	2017-04-21	80	173	26.7299	Fisioterapeuta	DE PIE	TRUE	MODERADO	FALSE						FALSE	FALSE	FALSE	FALSE	FALSE	FALSE	FALSE	FALSE	FALSE	FALSE	TRUE	TRUE	12	1387.79	35.9903	118.949	73.3373	-2.77259	-6.73336	1043	72.5936	-4.65001	-5.31996	904	71.8484	-3.60579	-4.22217	300	71.7532
PV004_Serie2	4	2	F	54	Superior	DIESTRO	2017-04-21	80	173	26.7299	Fisioterapeuta	DE PIE	TRUE	MODERADO	FALSE						FALSE	FALSE	FALSE	FALSE	FALSE	FALSE	FALSE	FALSE	FALSE	FALSE	TRUE	TRUE	12	1400.28	46.0619	119.412	71.6467	-1.43266	-1.04164	845	71.1581	-2.29372	-2.75151	724	69.8731	-4.63221	-0.236504	358	69.6553
PV005_Serie1	5	1	F	46	Superior	DIESTRO	2017-04-21	55	157	22.3133	Administrativo	SEDENTARIO	FALSE		FALSE				CRONICO (>6 meses desde aparición)	DISCONTINUO	FALSE	TRUE	FALSE	FALSE	FALSE	FALSE	FALSE	FALSE	FALSE	FALSE	FALSE	TRUE	33	1609.8	61.1627	138.915	67.7001	-0.863922	-4.63041	57	67.0734	2.39866	-4.62523	158	64.6482	1.63204	-3.39839	389	63.5588
PV005_Serie2	5	2	F	46	Superior	DIESTRO	2017-04-21	55	157	22.3133	Administrativo	SEDENTARIO	FALSE		FALSE				CRONICO (>6 meses desde aparición)	DISCONTINUO	FALSE	TRUE	FALSE	FALSE	FALSE	FALSE	FALSE	FALSE	FALSE	FALSE	FALSE	TRUE	33	1632.75	52.1312	142.237	71.308	0.377523	-4.86903	191	69.082	-1.43806	-6.249	54	68.3641	-1.09373	-4.43293	837	66.9797
PV006_Serie1	6	1	F	47	Medio	DIESTRO	2017-04-21	54	170	18.6851	Dependienta	DE PIE	FALSE		TRUE	2017-02-20	E	D	AGUDO (<3meses desde aparición)	FRECUENTE	FALSE	TRUE	FALSE	FALSE	TRUE	FALSE	FALSE	FALSE	FALSE	FALSE	FALSE	TRUE	72	1074.52	80.9123	108.357	68.3863	-3.59499	-5.42263	115	63.2477	-2.80825	-5.73946	181	59.9054	-3.4858	-6.20427	355	58.4108
PV006_Serie2	6	2	F	47	Medio	DIESTRO	2017-04-21	54	170	18.6851	Dependienta	DE PIE	FALSE		TRUE	2017-02-20	E	D	AGUDO (<3meses desde aparición)	FRECUENTE	FALSE	TRUE	FALSE	FALSE	TRUE	FALSE	FALSE	FALSE	FALSE	FALSE	FALSE	TRUE	72	1120.46	104.912	119.439	65.6278	3.08136	-1.74973	100	63.4726	5.59469	-0.954092	195	61.7867	7.13287	-1.58215	147	61.1589
PV007_Serie1	7	1	M	22	Superior	DIESTRO	2017-04-21	90	185	26.2966	Fisioterapeuta	DE PIE	TRUE	MODERADO	FALSE						FALSE	TRUE	FALSE	FALSE	FALSE	FALSE	FALSE	FALSE	FALSE	FALSE	FALSE	FALSE	0	1646.02	62.9213	141.604	67.9902	2.69254	-1.33498	592	66.5242	1.99368	-5.08859	729	65.6665	0.102133	-6.8457	377	65.0148
PV007_Serie2	7	2	M	22	Superior	DIESTRO	2017-04-21	90	185	26.2966	Fisioterapeuta	DE PIE	TRUE	MODERADO	FALSE						FALSE	TRUE	FALSE	FALSE	FALSE	FALSE	FALSE	FALSE	FALSE	FALSE	FALSE	FALSE	0	1592.48	67.2501	137.215	64.7627	4.29718	-3.27633	460	64.2268	9.47425	2.20613	151	62.5682	5.19576	-4.18435	359	62.1186
PV008_Serie1	8	1	F	50	Superior	DIESTRO	2017-04-25	57	166	20.6852			FALSE		TRUE	2016-11-18	B	C	CRONICO (>6 meses desde aparición)	FRECUENTE	FALSE	FALSE	FALSE	FALSE	FALSE	FALSE	FALSE	FALSE	FALSE	FALSE	FALSE	FALSE	40	1234.41	74.1832	115.95	60.8108	2.16844	-0.678045	283	59.6624	2.72856	2.10191	361	59.4114	0.0731882	-1.7467	52	59.2068
PV008_Serie2	8	2	F	50	Superior	DIESTRO	2017-04-25	57	166	20.6852			FALSE		TRUE	2016-11-18	B	C	CRONICO (>6 meses desde aparición)	FRECUENTE	FALSE	FALSE	FALSE	FALSE	FALSE	FALSE	FALSE	FALSE	FALSE	FALSE	FALSE	FALSE	40	1241.53	89.9658	117.22	59.3988	-0.131608	-3.24286	301	58.7888	0.810593	0.419588	111	58.7111	2.26975	-2.31105	178	58.2879
PV009_Serie1	9	1	F	51	Superior	DIESTRO	2017-04-25	71	168	25.1559	Enfermera	DE PIE	FALSE		TRUE	2015-09-30	B	C	CRONICO (>6 meses desde aparición)	ESPORADICO	TRUE	TRUE	FALSE	FALSE	FALSE	FALSE	FALSE	FALSE	FALSE	FALSE	FALSE	TRUE	6	1164.01	34.9764	106.177	55.3862	-0.639791	0.153346	79	53.0689	-2.00393	0.26829	237	52.5545	-3.22997	-2.27029	649	51.1062
PV009_Serie2	9	2	F	51	Superior	DIESTRO	2017-04-25	71	168	25.1559	Enfermera	DE PIE	FALSE		TRUE	2015-09-30	B	C	CRONICO (>6 meses desde aparición)	ESPORADICO	TRUE	TRUE	FALSE	FALSE	FALSE	FALSE	FALSE	FALSE	FALSE	FALSE	FALSE	TRUE	6	1125.69	31.444	102.717	54.4285	-4.34505	-4.50564	78	53.0887	-5.75507	-6.17577	824	51.6843	-6.71864	-6.30587	973	51.2988
PV010_Serie1	10	1	F	53	Básico	DIESTRO	2017-04-26	93	169	32.5619	Limpiadora	MODERADO	FALSE		FALSE				CRONICO (>6 meses desde aparición)	FRECUENTE	TRUE	TRUE	FALSE	FALSE	FALSE	FALSE	TRUE	FALSE	FALSE	FALSE	FALSE	TRUE	18	957.872	51.8329	93.0461	48.7939	1.86036	-4.57609	482	45.5453	2.42039	-4.37281	316	45.4453	2.7336	-4.38717	395	44.522
PV010_Serie2	10	2	F	53	Básico	DIESTRO	2017-04-26	93	169	32.5619	Limpiadora	MODERADO	FALSE		FALSE				CRONICO (>6 meses desde aparición)	FRECUENTE	TRUE	TRUE	FALSE	FALSE	FALSE	FALSE	TRUE	FALSE	FALSE	FALSE	FALSE	TRUE	18	913.574	49.7589	87.9236	44.3739	4.92664	-3.19895	272	44.1824	3.20347	-4.7493	354	44.0235	5.28122	-2.75355	437	42.0159
PV011_Serie1	11	1	F	50	Medio	DIESTRO	2017-05-26	64	168	22.6757	Administrativo	SEDENTARIO	TRUE	MODERADO	FALSE						FALSE	FALSE	FALSE	FALSE	FALSE	FALSE	FALSE	FALSE	FALSE	FALSE	FALSE	TRUE	24	897.392	38.9493	84.3635	40.8689	0.568325	0.0721552	607	39.8723	0.287426	-0.782758	510	39.8033	-0.726412	-2.50752	84	39.4546
PV011_Serie2	11	2	F	50	Medio	DIESTRO	2017-05-26	64	168	22.6757	Administrativo	SEDENTARIO	TRUE	MODERADO	FALSE						FALSE	FALSE	FALSE	FALSE	FALSE	FALSE	FALSE	FALSE	FALSE	FALSE	FALSE	TRUE	24	820.051	53.3887	80.1779	45.1655	4.72286	-2.24639	401	43.1781	4.78273	-1.82315	330	41.8602	3.71804	-0.44278	189	41.8373
PV012_Serie1	12	1	F	38	Superior	DIESTRO	2017-04-26	57	169	19.9573	Administrativo	SEDENTARIO	TRUE	MODERADO	FALSE						FALSE	FALSE	FALSE	FALSE	FALSE	FALSE	FALSE	FALSE	FALSE	FALSE	FALSE	FALSE	1	1528.46	57.6341	133.081	68.0603	-1.72817	-3.53011	736	67.6138	-2.70749	-4.17218	403	67.2105	-5.21121	-1.0793	509	66.6072
PV012_Serie2	12	2	F	38	Superior	DIESTRO	2017-04-26	57	169	19.9573	Administrativo	SEDENTARIO	TRUE	MODERADO	FALSE						FALSE	FALSE	FALSE	FALSE	FALSE	FALSE	FALSE	FALSE	FALSE	FALSE	FALSE	FALSE	1	1453.84	56.9688	127.054	71.15	-3.38863	-5.00848	272	71.13	-2.6944	-4.3043	692	70.6988	-5.38244	-5.98016	160	70.1361
PV013_Serie1	13	1	F	28	Medio	DIESTRO	2017-04-28	59	148	26.9357	Esteticista	DE PIE	FALSE		FALSE						FALSE	FALSE	FALSE	FALSE	FALSE	FALSE	FALSE	FALSE	FALSE	FALSE	FALSE	FALSE	37	1193.72	54.4579	105.019	51.925	3.17936	-2.02355	363	51.242	-2.09707	-2.09187	454	50.194	-1.4847	-3.02968	623	49.8101
PV013_Serie2	13	2	F	28	Medio	DIESTRO	2017-04-28	59	148	26.9357	Esteticista	DE PIE	FALSE		FALSE						FALSE	FALSE	FALSE	FALSE	FALSE	FALSE	FALSE	FALSE	FALSE	FALSE	FALSE	FALSE	37	994.069	48.5385	93.3918	54.7337	-1.7829	-4.66745	253	50.0557	0.177457	-4.21041	167	49.7851	1.89699	-3.3118	330	49.4657
PV014_Serie1	14	1	M	26	Medio	DIESTRO	2017-05-28	75	181	22.8931	Estudiante	SEDENTARIO	TRUE	INTENSO	TRUE	2017-03-10	E	C	AGUDO (<3meses desde aparición)		FALSE	TRUE	FALSE	FALSE	TRUE	FALSE	FALSE	FALSE	FALSE	FALSE	FALSE	TRUE	44	1120.12	58.9535	103.51	60.9237	1.38422	1.43219	221	57.3428	1.04439	-0.7482	139	57.0719	0.170315	0.489118	302	56.2876
PV014_Serie2	14	2	M	26	Medio	DIESTRO	2017-05-28	75	181	22.8931	Estudiante	SEDENTARIO	TRUE	INTENSO	TRUE	2017-03-10	E	C	AGUDO (<3meses desde aparición)		FALSE	TRUE	FALSE	FALSE	TRUE	FALSE	FALSE	FALSE	FALSE	FALSE	FALSE	TRUE	44	1363.25	56.8971	118.057	64.9419	-0.948898	-0.189647	190	64.3988	-2.00328	-0.563615	391	64.3962	-1.66645	-0.742539	295	64.3171
PV015_Serie1	15	1	F	54	Básico	DIESTRO	2017-05-28	53	155	22.0604	Limpiadora	MODERADO	TRUE	LEVE	TRUE	2015-06-24	FRONTAL	C	CRONICO (>6 meses desde aparición)	FRECUENTE	FALSE	TRUE	FALSE	FALSE	TRUE	FALSE	TRUE	FALSE	FALSE	FALSE	TRUE	TRUE	25	1117.36	33.2944	103.275	57.9642	-1.2295	-0.402121	893	54.975	-0.267523	-0.340022	762	54.0904	-0.403337	-0.680072	631	51.309
PV015_Serie2	15	2	F	54	Básico	DIESTRO	2017-05-28	53	155	22.0604	Limpiadora	MODERADO	TRUE	LEVE	TRUE	2015-06-24	FRONTAL	C	CRONICO (>6 meses desde aparición)	FRECUENTE	FALSE	TRUE	FALSE	FALSE	TRUE	FALSE	TRUE	FALSE	FALSE	FALSE	TRUE	TRUE	25	1118.83	50.3071	104.25	62.6104	1.32617	1.13209	430	59.7602	-0.37499	-0.258558	340	56.4861	1.14615	0.714081	520	53.8276
PV016_Serie1	16	1	F	39	Superior	DIESTRO	2017-04-28	58	168	20.5499	Fisioterapeuta	DE PIE	TRUE	LEVE	FALSE				CRONICO (>6 meses desde aparición)	FRECUENTE	TRUE	FALSE	FALSE	FALSE	TRUE	FALSE	FALSE	FALSE	FALSE	FALSE	FALSE	FALSE	52	873.652	28.2918	76.6436	49.1716	-3.59187	-5.10614	729	47.9467	-3.73547	-6.85705	608	47.9441	-3.87102	-6.8506	839	46.7204
PV016_Serie2	16	2	F	39	Superior	DIESTRO	2017-04-28	58	168	20.5499	Fisioterapeuta	DE PIE	TRUE	LEVE	FALSE				CRONICO (>6 meses desde aparición)	FRECUENTE	TRUE	FALSE	FALSE	FALSE	TRUE	FALSE	FALSE	FALSE	FALSE	FALSE	FALSE	FALSE	52	703.652	20.1504	66.3051	45.6654	-0.993945	-3.03379	606	45.4969	1.48486	-2.76704	97	43.2485	-0.660478	-2.57018	466	42.6322
PV017_Serie1	17	1	F	19	Superior	DIESTRO	2017-05-02	61	153	26.0584	Fisioterapeuta	DE PIE	FALSE		FALSE						FALSE	FALSE	FALSE	FALSE	FALSE	FALSE	FALSE	FALSE	FALSE	FALSE	FALSE	FALSE	0	1673.76	78.3596	145.926	83.0947	10.1411	-0.678047	614	82.4374	7.8021	-4.8244	351	81.6248	10.5592	-1.29211	525	81.3357
PV017_Serie2	17	2	F	19	Superior	DIESTRO	2017-05-02	61	153	26.0584	Fisioterapeuta	DE PIE	FALSE		FALSE						FALSE	FALSE	FALSE	FALSE	FALSE	FALSE	FALSE	FALSE	FALSE	FALSE	FALSE	FALSE	0	1501.85	98.8061	141.252	89.7564	4.46656	-0.0696812	397	87.8107	5.31229	-0.851288	195	87.759	2.97097	1.48268	264	86.1738
PV018_Serie1	18	1	M	65	Básico	DIESTRO	2017-05-02	68	157	27.5873	Operario	DE PIE	TRUE	MODERADO	FALSE				AGUDO (<3meses desde aparición)	FRECUENTE	TRUE	TRUE	FALSE	FALSE	FALSE	FALSE	TRUE	FALSE	FALSE	FALSE	FALSE	TRUE	7	1047.28	52.5742	98.8551	56.2766	9.23252	-3.41624	262	54.1292	8.13848	-3.30754	353	53.7625	8.68802	-3.87005	69	53.4116
PV018_Serie2	18	2	M	65	Básico	DIESTRO	2017-05-02	68	157	27.5873	Operario	DE PIE	TRUE	MODERADO	FALSE				AGUDO (<3meses desde aparición)	FRECUENTE	TRUE	TRUE	FALSE	FALSE	FALSE	FALSE	TRUE	FALSE	FALSE	FALSE	FALSE	TRUE	7	802.65	52.3923	79.3416	44.5028	4.82022	-1.20187	402	41.9983	5.63588	-0.464207	336	39.397	3.73372	-0.391889	271	39.0721
PV019_Serie1	19	1	F	24	Superior	DIESTRO	2017-05-02	83	171	28.3848	Fisioterapeuta	DE PIE	TRUE	MODERADO	FALSE						FALSE	FALSE	FALSE	FALSE	FALSE	FALSE	FALSE	FALSE	FALSE	FALSE	FALSE	FALSE	0	1330.44	36.7119	114.446	63.6929	-4.06202	-5.28201	400	62.9464	-5.02949	-8.71663	564	61.8732	-3.61196	-5.42356	989	61.8246
PV019_Serie2	19	2	F	24	Superior	DIESTRO	2017-05-02	83	171	28.3848	Fisioterapeuta	DE PIE	TRUE	MODERADO	FALSE						FALSE	FALSE	FALSE	FALSE	FALSE	FALSE	FALSE	FALSE	FALSE	FALSE	FALSE	FALSE	0	1415.11	40.5243	125.099	70.5006	5.06427	-4.68793	91	67.3681	3.79162	-2.63962	253	67.2059	-4.21269	-5.11083	964	66.8915
PV020_Serie1	20	1	M	38	Superior	DIESTRO	2017-05-03	74	172	25.0135	Administrativo	SEDENTARIO	TRUE	MODERADO	FALSE						FALSE	FALSE	FALSE	FALSE	FALSE	FALSE	FALSE	FALSE	FALSE	FALSE	FALSE	FALSE	0	1208.82	40.7283	105.458	64.2788	2.24232	-0.967523	808	63.7387	0.153005	-0.841905	703	63.6997	-0.0519457	-1.78433	339	63.6935
PV020_Serie2	20	2	M	38	Superior	DIESTRO	2017-05-03	74	172	25.0135	Administrativo	SEDENTARIO	TRUE	MODERADO	FALSE						FALSE	FALSE	FALSE	FALSE	FALSE	FALSE	FALSE	FALSE	FALSE	FALSE	FALSE	FALSE	0	1105.82	40.2997	95.6867	59.4439	-1.48218	-3.65932	67	58.8731	1.13157	-0.136972	641	58.3298	1.06323	-3.13004	305	58.1438
PV021_Serie1	21	1	F	44	Medio	AMBIDIESTRO	2017-05-03	61	168	21.6128	Auciliar farmacia	SEDENTARIO	TRUE	LEVE	TRUE	2016-08-15	E		CRONICO (>6 meses desde aparición)	ESPORADICO	FALSE	FALSE	FALSE	FALSE	FALSE	FALSE	FALSE	FALSE	FALSE	FALSE	FALSE	FALSE	0	1088.58	49.0351	114.297	52.0228	5.50825	1.55137	75	44.4256	4.7675	-0.197024	168	42.5293	3.44417	0.163901	381	40.9526
PV021_Serie2	21	2	F	44	Medio	AMBIDIESTRO	2017-05-03	61	168	21.6128	Auciliar farmacia	SEDENTARIO	TRUE	LEVE	TRUE	2016-08-15	E		CRONICO (>6 meses desde aparición)	ESPORADICO	FALSE	FALSE	FALSE	FALSE	FALSE	FALSE	FALSE	FALSE	FALSE	FALSE	FALSE	FALSE	0	1075.05	51.3888	105.727	38.4192	4.02428	-3.16045	271	36.9866	6.48272	-2.69338	366	35.6869	7.10925	-2.31587	167	34.9463
PV022_Serie1	22	1	F	40	Superior	DIESTRO	2017-05-03	80	169	28.0102	Doctorando	MODERADO	TRUE	MODERADO	TRUE	2017-03-06	B	D	CRONICO (>6 meses desde aparición)	FRECUENTE	TRUE	TRUE	FALSE	FALSE	TRUE	FALSE	TRUE	FALSE	FALSE	FALSE	FALSE	TRUE	58	1242.67	53.9352	110.378	50.7024	5.20603	-0.44794	447	50.4172	2.91637	-0.137793	76	48.6073	5.41643	-0.76302	357	48.1987
PV022_Serie2	22	2	F	40	Superior	DIESTRO	2017-05-03	80	169	28.0102	Doctorando	MODERADO	TRUE	MODERADO	TRUE	2017-03-06	B	D	CRONICO (>6 meses desde aparición)	FRECUENTE	TRUE	TRUE	FALSE	FALSE	TRUE	FALSE	TRUE	FALSE	FALSE	FALSE	FALSE	TRUE	58	1265.04	41.7228	108.839	51.0298	-1.23036	-5.15837	821	50.1854	2.30899	-4.28153	314	49.4555	2.58611	-2.90629	63	49.2115
PV023_Serie1	23	1	F	70	Superior	ZURDO	2017-05-03	56	156	23.0112	Gerocultora	MODERADO	FALSE		FALSE				AGUDO (<3meses desde aparición)	FRECUENTE	FALSE	TRUE	FALSE	FALSE	TRUE	FALSE	FALSE	TRUE	FALSE	FALSE	TRUE	TRUE	84	558.412	18.9164	58.1804	30.3613	5.64758	-3.14768	235	26.7331	5.01121	-4.16594	385	26.102	5.52468	-2.91632	638	26.0749
PV023_Serie2	23	2	F	70	Superior	ZURDO	2017-05-03	56	156	23.0112	Gerocultora	MODERADO	FALSE		FALSE				AGUDO (<3meses desde aparición)	FRECUENTE	FALSE	TRUE	FALSE	FALSE	TRUE	FALSE	FALSE	TRUE	FALSE	FALSE	TRUE	TRUE	84	493.722	23.9671	50.8502	32.0379	5.38528	-2.71997	454	28.2138	5.19957	-3.74986	275	27.2663	5.54695	-1.34258	72	26.8389
PV024_Serie1	24	1	F	33	Medio	DIESTRO	2017-05-03	55	152	23.8054	Estudiante	DE PIE	TRUE	MODERADO	FALSE				CRONICO (>6 meses desde aparición)	FRECUENTE	TRUE	TRUE	FALSE	FALSE	TRUE	FALSE	TRUE	TRUE	FALSE	FALSE	FALSE	TRUE	19	966.253	13.4351	79.7261	44.5407	7.11475	0.297634	329	43.9485	5.6539	-1.28174	907	41.0155	7.97718	0.955927	662	41.0041
PV024_Serie2	24	2	F	33	Medio	DIESTRO	2017-05-03	55	152	23.8054	Estudiante	DE PIE	TRUE	MODERADO	FALSE				CRONICO (>6 meses desde aparición)	FRECUENTE	TRUE	TRUE	FALSE	FALSE	TRUE	FALSE	TRUE	TRUE	FALSE	FALSE	FALSE	TRUE	19	792.087	11.0073	70.2699	44.1314	3.07602	0.978958	1108	43.6116	5.10101	0.700533	489	42.9341	3.24006	0.251839	801	40.1059
PV025_Serie1	25	1	M	42	Superior	DIESTRO	2017-05-05	70	172	23.6614	RRHH	SEDENTARIO	FALSE		FALSE				CRONICO (>6 meses desde aparición)	FRECUENTE	FALSE	TRUE	FALSE	FALSE	FALSE	FALSE	FALSE	FALSE	FALSE	FALSE	FALSE	FALSE	33	1291.91	45.0458	112.604	58.7613	-0.860776	-1.534	672	56.9329	-0.761844	-1.03003	783	56.7199	0.27528	0.616115	558	54.8381
PV025_Serie2	25	2	M	42	Superior	DIESTRO	2017-05-05	70	172	23.6614	RRHH	SEDENTARIO	FALSE		FALSE				CRONICO (>6 meses desde aparición)	FRECUENTE	FALSE	TRUE	FALSE	FALSE	FALSE	FALSE	FALSE	FALSE	FALSE	FALSE	FALSE	FALSE	33	1215.16	37.5514	108.359	58.3139	-6.03332	3.27721	388	56.1531	-4.68631	1.31378	886	53.9988	-3.76925	2.88921	769	53.7572
PV026_Serie1	26	1	F	42	Superior	DIESTRO	2017-05-05	54	161	20.8325	Fisioterapeuta	DE PIE	TRUE	LEVE	FALSE						FALSE	FALSE	FALSE	FALSE	FALSE	FALSE	FALSE	FALSE	FALSE	FALSE	FALSE	FALSE	0	1535.39	72.0162	132.301	75.5497	4.87775	4.00215	71	74.997	2.06491	3.16691	266	74.7645	1.85964	3.83071	523	74.682
PV026_Serie2	26	2	F	42	Superior	DIESTRO	2017-05-05	54	161	20.8325	Fisioterapeuta	DE PIE	TRUE	LEVE	FALSE						FALSE	FALSE	FALSE	FALSE	FALSE	FALSE	FALSE	FALSE	FALSE	FALSE	FALSE	FALSE	0	1501.9	76.9414	130.45	77.0164	-0.163341	1.85506	482	76.565	-2.26294	-0.331773	329	76.0487	-0.606012	0.0556157	248	75.6768
PV027_Serie1	27	1	F	46	Medio	DIESTRO	2017-05-05	69	161	26.6193	Administrativo	SEDENTARIO	TRUE	LEVE	FALSE						FALSE	FALSE	FALSE	FALSE	FALSE	FALSE	FALSE	FALSE	FALSE	FALSE	FALSE	FALSE	0	1343.79	49.187	114.713	54.2501	1.3983	1.85637	96	53.7211	4.47881	1.6753	560	53.6224	5.67241	3.06665	667	52.9808
PV027_Serie2	27	2	F	46	Medio	DIESTRO	2017-05-05	69	161	26.6193	Administrativo	SEDENTARIO	TRUE	LEVE	FALSE						FALSE	FALSE	FALSE	FALSE	FALSE	FALSE	FALSE	FALSE	FALSE	FALSE	FALSE	FALSE	0	1146.57	55.4433	102.207	48.0617	1.08883	0.888827	54	47.7986	4.43507	3.01088	571	47.2638	-0.556965	1.03239	247	46.741
PV028_Serie1	28	1	F	54	Medio	DIESTRO	2017-05-05	78	163	29.3575	Auxiliar de clinica	DE PIE	TRUE	MODERADO	FALSE				CRONICO (>6 meses desde aparición)	FRECUENTE	FALSE	TRUE	FALSE	FALSE	FALSE	FALSE	FALSE	FALSE	FALSE	FALSE	FALSE	TRUE	7	1147.01	54.7235	103.079	50.8166	-3.40749	-3.98654	572	49.937	-0.863898	-1.99032	216	49.0443	-1.33144	-1.97732	308	47.8294
PV028_Serie2	28	2	F	54	Medio	DIESTRO	2017-05-05	78	163	29.3575	Auxiliar de clinica	DE PIE	TRUE	MODERADO	FALSE				CRONICO (>6 meses desde aparición)	FRECUENTE	FALSE	TRUE	FALSE	FALSE	FALSE	FALSE	FALSE	FALSE	FALSE	FALSE	FALSE	TRUE	7	1006.15	56.1466	97.2116	43.3903	-6.1614	1.34215	368	43.2117	-6.95269	-1.67014	450	41.6437	-5.06042	-3.76698	196	41.4911
PV029_Serie1	29	1	F	38	Básico	DIESTRO	2017-05-05	103	156	42.3241	Operario de linea	MODERADO	FALSE		FALSE				CRONICO (>6 meses desde aparición)	FRECUENTE	FALSE	TRUE	FALSE	FALSE	TRUE	FALSE	FALSE	FALSE	FALSE	FALSE	TRUE	FALSE	60	1148.75	61.894	111.525	53.6968	3.58761	5.19489	346	52.5241	2.47578	4.162	269	50.0995	4.21565	5.21093	425	48.618
PV029_Serie2	29	2	F	38	Básico	DIESTRO	2017-05-05	103	156	42.3241	Operario de linea	MODERADO	FALSE		FALSE				CRONICO (>6 meses desde aparición)	FRECUENTE	FALSE	TRUE	FALSE	FALSE	TRUE	FALSE	FALSE	FALSE	FALSE	FALSE	TRUE	FALSE	60	1257.98	61.3053	111.219	58.3809	-0.451542	5.84527	589	57.4217	-2.30867	4.84078	258	57.2117	-0.790688	5.4132	342	55.5928
PV030_Serie1	30	1	F	69	Superior	DIESTRO	2017-05-09	66	168	23.3844	Abogada	SEDENTARIO	TRUE	MODERADO	FALSE				CRONICO (>6 meses desde aparición)	ESPORADICO	FALSE	FALSE	FALSE	FALSE	FALSE	FALSE	FALSE	FALSE	FALSE	FALSE	FALSE	FALSE	29	1386.88	30.2812	118.384	59.761	-4.50288	-0.693002	499	59.3179	-5.06237	-1.65698	301	59.1905	-6.15949	-1.23565	686	58.7256
PV030_Serie2	30	2	F	69	Superior	DIESTRO	2017-05-09	66	168	23.3844	Abogada	SEDENTARIO	TRUE	MODERADO	FALSE				CRONICO (>6 meses desde aparición)	ESPORADICO	FALSE	FALSE	FALSE	FALSE	FALSE	FALSE	FALSE	FALSE	FALSE	FALSE	FALSE	FALSE	29	1417.49	27.5134	120.707	57.9566	-1.55543	-0.788213	1395	57.1911	-1.26437	0.116206	1178	56.9097	-1.88142	-1.09742	332	56.6705
PV031_Serie1	31	1	M	50	Superior	DIESTRO	2017-05-10	81	175	26.449	Cantante	MUY PESADO	TRUE	INTENSO	FALSE				CRONICO (>6 meses desde aparición)	FRECUENTE	FALSE	TRUE	FALSE	FALSE	FALSE	FALSE	FALSE	FALSE	FALSE	FALSE	FALSE	FALSE	15	1733.32	55.8414	137.956	61.5615	1.28847	-0.267264	621	60.373	2.11356	1.19848	505	60.1062	3.39009	0.0999281	257	59.4427
PV031_Serie2	31	2	M	50	Superior	DIESTRO	2017-05-10	81	175	26.449	Cantante	MUY PESADO	TRUE	INTENSO	FALSE				CRONICO (>6 meses desde aparición)	FRECUENTE	FALSE	TRUE	FALSE	FALSE	FALSE	FALSE	FALSE	FALSE	FALSE	FALSE	FALSE	FALSE	15	1625.03	43.4964	133.775	62.0781	2.61005	-0.561259	464	61.7321	3.41338	0.347997	616	61.448	0.696587	-0.271772	754	59.3134
PV032_Serie1	32	1	M	32	Superior	DIESTRO	2017-05-10	68	178	21.4619	Asesor financiero	SEDENTARIO	FALSE		FALSE				CRONICO (>6 meses desde aparición)	ESPORADICO	FALSE	TRUE	FALSE	FALSE	TRUE	FALSE	FALSE	FALSE	FALSE	FALSE	FALSE	TRUE	24	1377.34	63.2967	119.049	56.6648	-1.94894	0.0816652	433	56.6172	-2.39364	0.408683	347	54.7801	-3.59515	0.44745	615	54.2898
PV032_Serie2	32	2	M	32	Superior	DIESTRO	2017-05-10	68	178	21.4619	Asesor financiero	SEDENTARIO	FALSE		FALSE				CRONICO (>6 meses desde aparición)	ESPORADICO	FALSE	TRUE	FALSE	FALSE	TRUE	FALSE	FALSE	FALSE	FALSE	FALSE	FALSE	TRUE	24	1195.83	66.2874	111.466	53.0751	-1.56236	-1.80081	400	52.3585	0.0775661	-0.849361	317	51.9075	0.391862	-2.20496	477	51.4908
PV033_Serie1	33	1	F	60	Medio	DIESTRO	2017-05-10	112	162	42.6764	Auxiliar de enfermeria	MODERADO	FALSE		FALSE				CRONICO (>6 meses desde aparición)	FRECUENTE	TRUE	TRUE	FALSE	FALSE	TRUE	FALSE	FALSE	FALSE	FALSE	FALSE	FALSE	FALSE	25	1159.76	34.9746	100.874	56.7241	-5.42266	-2.51036	251	56.6939	-3.75872	-2.71232	402	56.0652	-5.81602	-2.37016	97	54.8733
PV033_Serie2	33	2	F	60	Medio	DIESTRO	2017-05-10	112	162	42.6764	Auxiliar de enfermeria	MODERADO	FALSE		FALSE				CRONICO (>6 meses desde aparición)	FRECUENTE	TRUE	TRUE	FALSE	FALSE	TRUE	FALSE	FALSE	FALSE	FALSE	FALSE	FALSE	FALSE	25	1194.7	28.8297	101.68	60.545	-9.38218	-3.10103	600	59.8057	-6.85578	-1.42603	422	59.6208	-8.15785	-2.01835	780	59.4585
PV034_Serie1	34	1	F	24	Superior		2017-05-10	52	169	18.2066		SEDENTARIO	TRUE	LEVE	TRUE	2014-03-01	E	C	CRONICO (>6 meses desde aparición)	FRECUENTE	FALSE	TRUE	FALSE	FALSE	FALSE	FALSE	TRUE	FALSE	FALSE	FALSE	FALSE	TRUE	31	1363.57	45.2111	118.567	62.29	-6.93733	-3.675	221	60.9199	-7.48955	-4.16925	717	60.4675	-7.10253	-4.9967	352	60.3224
PV034_Serie2	34	2	F	24	Superior		2017-05-10	52	169	18.2066		SEDENTARIO	TRUE	LEVE	TRUE	2014-03-01	E	C	CRONICO (>6 meses desde aparición)	FRECUENTE	FALSE	TRUE	FALSE	FALSE	FALSE	FALSE	TRUE	FALSE	FALSE	FALSE	FALSE	TRUE	31	1242.62	44.4428	111.433	66.8341	-4.81358	-4.02252	196	65.6243	-4.10431	-4.27232	555	64.6574	-3.84978	-5.40784	433	61.3536
PV035_Serie1	35	1	F	62	Superior	DIESTRO	2017-05-12	65	165	23.8751	Farmaceutica	DE PIE	TRUE	MODERADO	TRUE	2014-01-01	LATERAL DERECHO	C	CRONICO (>6 meses desde aparición)	ESPORADICO	FALSE	TRUE	FALSE	FALSE	TRUE	FALSE	TRUE	FALSE	FALSE	FALSE	FALSE	FALSE	6	1144.9	73.2033	113.492	48.8304	3.62542	-2.25618	128	44.8629	-0.719432	-6.00025	63	40.9643	2.62666	-3.36529	201	40.1629
PV035_Serie2	35	2	F	62	Superior	DIESTRO	2017-05-12	65	165	23.8751	Farmaceutica	DE PIE	TRUE	MODERADO	TRUE	2014-01-01	LATERAL DERECHO	C	CRONICO (>6 meses desde aparición)	ESPORADICO	FALSE	TRUE	FALSE	FALSE	TRUE	FALSE	TRUE	FALSE	FALSE	FALSE	FALSE	FALSE	6	1237.22	78.5041	116.246	49.3314	4.12855	-1.29158	125	48.5319	2.89373	-2.2555	55	47.8632	2.77159	-0.761545	411	46.4259
PV036_Serie1	36	1	F	53	Superior	DIESTRO	2017-05-12	65	170	22.4913	Fisioterapeuta	DE PIE	TRUE	MODERADO	FALSE						FALSE	FALSE	FALSE	FALSE	FALSE	FALSE	FALSE	FALSE	FALSE	FALSE	FALSE	TRUE	0	1633.15	32.3013	137.81	62.8002	5.69382	-0.181054	348	62.5388	5.88605	-0.323269	117	61.7723	3.61905	-0.884904	571	61.5374
PV036_Serie2	36	2	F	53	Superior	DIESTRO	2017-05-12	65	170	22.4913	Fisioterapeuta	DE PIE	TRUE	MODERADO	FALSE						FALSE	FALSE	FALSE	FALSE	FALSE	FALSE	FALSE	FALSE	FALSE	FALSE	FALSE	TRUE	0	1612.97	35.6536	136.75	66.7774	2.7851	-2.53793	319	66.2555	4.89085	-0.618246	1236	65.8024	3.44756	-2.37186	695	64.917
PV037_Serie1	37	1	F	30	Básico	DIESTRO	2017-05-12	100	169	35.0128	Ama de casa	SEDENTARIO	FALSE		TRUE		E	C	CRONICO (>6 meses desde aparición)	FRECUENTE	FALSE	TRUE	FALSE	FALSE	FALSE	FALSE	FALSE	TRUE	TRUE	FALSE	FALSE	FALSE	9	1292.34	64.4882	116.295	60.2193	-4.54984	0.132983	576	57.505	-4.66467	-2.5283	168	56.5511	-4.23938	-1.71444	331	55.6861
PV037_Serie2	37	2	F	30	Básico	DIESTRO	2017-05-12	100	169	35.0128	Ama de casa	SEDENTARIO	FALSE		TRUE		E	C	CRONICO (>6 meses desde aparición)	FRECUENTE	FALSE	TRUE	FALSE	FALSE	FALSE	FALSE	FALSE	TRUE	TRUE	FALSE	FALSE	FALSE	9	1149.75	55.813	113.676	61.7205	-5.34119	-0.999738	332	59.7078	-3.65212	0.228326	525	58.1279	-1.98596	-0.625889	432	57.839
PV038_Serie1	38	1	F	29	Superior	AMBIDIESTRO	2017-05-12	64	160	25		SEDENTARIO	TRUE	LEVE	FALSE						FALSE	FALSE	FALSE	FALSE	FALSE	FALSE	FALSE	FALSE	FALSE	FALSE	FALSE	FALSE	0	1388.48	80.3521	133.555	71.9292	-4.66044	-4.70433	357	68.9189	-2.58386	-5.53093	436	67.7694	-2.15612	-4.21826	207	65.4917
PV038_Serie2	38	2	F	29	Superior	AMBIDIESTRO	2017-05-12	64	160	25		SEDENTARIO	TRUE	LEVE	FALSE						FALSE	FALSE	FALSE	FALSE	FALSE	FALSE	FALSE	FALSE	FALSE	FALSE	FALSE	FALSE	0	1453.63	92.2352	130.577	73.369	-3.99994	-0.544008	180	72.2356	4.12055	-0.258668	444	71.1588	-1.45512	0.682582	311	69.6416
PV039_Serie1	39	1	F	55	Superior	DIESTRO	2017-05-16	53	160	20.7031			FALSE		TRUE	2010-10-01	E	C			FALSE	FALSE	FALSE	FALSE	FALSE	FALSE	FALSE	FALSE	FALSE	FALSE	FALSE	FALSE	44	1276.7	33.5267	111.013	57.8143	-8.68156	0.814756	241	57.0395	-8.5828	1.68752	709	56.8256	-8.71944	2.07754	555	56.647
PV039_Serie2	39	2	F	55	Superior	DIESTRO	2017-05-16	53	160	20.7031			FALSE		TRUE	2010-10-01	E	C			FALSE	FALSE	FALSE	FALSE	FALSE	FALSE	FALSE	FALSE	FALSE	FALSE	FALSE	FALSE	44	1219.53	39.5437	105.81	59.513	-9.0751	3.09311	728	57.4096	-10.7953	2.59538	608	56.8307	-10.691	2.41902	487	56.3809
PV040_Serie1	40	1	F	72	Básico	DIESTRO	2017-05-16	54	158	21.6311	Ama de casa	SEDENTARIO	TRUE	MODERADO	FALSE						FALSE	FALSE	FALSE	FALSE	FALSE	FALSE	FALSE	FALSE	FALSE	FALSE	FALSE	FALSE	0	1191.21	31.021	102.787	50.1126	-11.6775	2.76933	1044	48.5807	-10.0109	4.8343	84	48.2478	-9.93922	3.18037	720	48.0474
PV040_Serie2	40	2	F	72	Básico	DIESTRO	2017-05-16	54	158	21.6311	Ama de casa	SEDENTARIO	TRUE	MODERADO	FALSE						FALSE	FALSE	FALSE	FALSE	FALSE	FALSE	FALSE	FALSE	FALSE	FALSE	FALSE	FALSE	0	1149.79	31.109	98.827	53.5815	-10.5572	1.44221	693	52.8692	-10.4626	3.39859	224	52.377	-10.2663	4.29573	87	51.2345
PV041_Serie1	41	1	F	18	Superior	DIESTRO	2017-05-16	66	172	22.3094	Fisioterapeuta	MODERADO	TRUE	MODERADO	FALSE						FALSE	FALSE	FALSE	FALSE	FALSE	FALSE	FALSE	FALSE	FALSE	FALSE	FALSE	FALSE	0	1618.53	87.3935	139.572	63.3955	-3.41114	-1.17535	107	62.4038	0.156026	0.113463	492	61.9805	-2.12308	-0.783312	416	61.5378
PV041_Serie2	41	2	F	18	Superior	DIESTRO	2017-05-16	66	172	22.3094	Fisioterapeuta	MODERADO	TRUE	MODERADO	FALSE						FALSE	FALSE	FALSE	FALSE	FALSE	FALSE	FALSE	FALSE	FALSE	FALSE	FALSE	FALSE	0	1663.12	86.441	144.306	60.8926	1.04695	1.20609	182	60.6385	0.784656	1.31957	351	59.4955	2.17837	2.34802	432	58.3383
PV042_Serie1	42	1	M	48	Medio	DIESTRO	2017-05-16	102	180	31.4815	Policia	MODERADO	TRUE	LEVE	FALSE						FALSE	TRUE	FALSE	FALSE	FALSE	FALSE	TRUE	FALSE	FALSE	FALSE	FALSE	FALSE	0	1081.94	73.9028	100.669	46.6144	-3.63896	2.06374	184	46.4202	-2.21725	3.28047	50	45.7315	-2.09745	2.32983	118	45.2382
PV042_Serie2	42	2	M	48	Medio	DIESTRO	2017-05-16	102	180	31.4815	Policia	MODERADO	TRUE	LEVE	FALSE						FALSE	TRUE	FALSE	FALSE	FALSE	FALSE	TRUE	FALSE	FALSE	FALSE	FALSE	FALSE	0	967.739	58.1574	94.7131	43.931	-2.97778	1.35071	45	41.2649	-2.8333	0.603349	341	40.9689	-3.9775	-0.950275	416	40.1519
PV043_Serie1	43	1	F	64	Básico	DIESTRO	2017-05-17	45	159	17.7999		SEDENTARIO	TRUE	LEVE	FALSE				CRONICO (>6 meses desde aparición)	FRECUENTE	TRUE	TRUE	FALSE	FALSE	TRUE	FALSE	FALSE	TRUE	TRUE	FALSE	FALSE	TRUE	68	667.446	20.0796	60.2251	39.0579	3.62972	-4.37763	393	38.6375	3.58028	-3.44367	925	38.5486	5.20274	-2.27839	790	37.2164
PV043_Serie2	43	2	F	64	Básico	DIESTRO	2017-05-17	45	159	17.7999		SEDENTARIO	TRUE	LEVE	FALSE				CRONICO (>6 meses desde aparición)	FRECUENTE	TRUE	TRUE	FALSE	FALSE	TRUE	FALSE	FALSE	TRUE	TRUE	FALSE	FALSE	TRUE	68	595.589	17.4967	54.3406	36.4136	2.96614	-2.98323	943	36.0944	2.34855	-3.46086	526	35.4074	3.20297	-2.81352	671	34.8814
PV044_Serie1	44	1	F	25	Medio	AMBIDIESTRO	2017-05-17	62	163	23.3355	Administracion	SEDENTARIO	FALSE		FALSE						FALSE	FALSE	FALSE	FALSE	FALSE	FALSE	FALSE	FALSE	FALSE	FALSE	FALSE	FALSE	1	1576.52	74.6456	136.025	58.9746	5.88412	-7.37823	142	58.2357	3.73479	-7.35024	498	57.432	6.53952	-8.70324	583	56.9849
PV044_Serie2	44	2	F	25	Medio	AMBIDIESTRO	2017-05-17	62	163	23.3355	Administracion	SEDENTARIO	FALSE		FALSE						FALSE	FALSE	FALSE	FALSE	FALSE	FALSE	FALSE	FALSE	FALSE	FALSE	FALSE	FALSE	1	1396.97	67.0332	133.396	56.1257	4.0409	-10.636	53	54.6425	6.15778	-4.51007	425	52.96	6.10132	-9.28899	329	52.8385
PV045_Serie1	45	1	F	53	Medio	DIESTRO	2017-05-17	71	165	26.079	Cocinera	MODERADO	FALSE		TRUE	2017-04-16	FRONTAL	E	AGUDO (<3meses desde aparición)	FRECUENTE	TRUE	TRUE	FALSE	FALSE	FALSE	FALSE	FALSE	TRUE	FALSE	FALSE	TRUE	TRUE	79	938.624	50.2475	87.4349	49.8149	0.310748	-6.62476	223	49.809	2.36447	-5.21515	392	49.2615	-0.649132	-9.36058	144	49.07
PV045_Serie2	45	2	F	53	Medio	DIESTRO	2017-05-17	71	165	26.079	Cocinera	MODERADO	FALSE		TRUE	2017-04-16	FRONTAL	E	AGUDO (<3meses desde aparición)	FRECUENTE	TRUE	TRUE	FALSE	FALSE	FALSE	FALSE	FALSE	TRUE	FALSE	FALSE	TRUE	TRUE	79	901.773	38.3407	79.6114	50.9404	5.25942	-2.24539	666	48.545	1.60167	-3.97177	386	48.1785	2.80474	-3.12594	575	47.8178
PV046_Serie1	46	1	F	66	Superior	DIESTRO	2017-05-19	63	180	19.4444	Empresaria	SEDENTARIO	TRUE	INTENSO	FALSE						FALSE	TRUE	TRUE	FALSE	FALSE	FALSE	FALSE	FALSE	FALSE	FALSE	FALSE	FALSE	5	1260.29	62.3906	109.22	59.0704	-1.0919	3.87582	413	58.7937	-0.765073	4.04194	245	58.4775	-2.44894	4.91663	501	58.426
PV046_Serie2	46	2	F	66	Superior	DIESTRO	2017-05-19	63	180	19.4444	Empresaria	SEDENTARIO	TRUE	INTENSO	FALSE						FALSE	TRUE	TRUE	FALSE	FALSE	FALSE	FALSE	FALSE	FALSE	FALSE	FALSE	FALSE	5	1263.2	49.8893	106.682	64.6287	-6.1235	2.18372	278	64.0918	-5.80685	3.32498	360	63.2763	-5.96326	2.50633	528	63.0238
PV047_Serie1	47	1	M	22	Superior	AMBIDIESTRO	2017-05-19	70	163	26.3465	Estudiante	SEDENTARIO	TRUE	INTENSO	TRUE	2017-04-17	FRONTAL	E	AGUDO (<3meses desde aparición)	FRECUENTE	TRUE	TRUE	FALSE	FALSE	TRUE	FALSE	TRUE	FALSE	FALSE	FALSE	FALSE	TRUE	86	662.396	30.4971	65.5493	34.928	-5.76406	-5.15797	68	33.2441	-4.34165	-4.47422	275	32.5241	-3.83251	-3.87706	466	30.3272
PV047_Serie2	47	2	M	22	Superior	AMBIDIESTRO	2017-05-19	70	163	26.3465	Estudiante	SEDENTARIO	TRUE	INTENSO	TRUE	2017-04-17	FRONTAL	E	AGUDO (<3meses desde aparición)	FRECUENTE	TRUE	TRUE	FALSE	FALSE	TRUE	FALSE	TRUE	FALSE	FALSE	FALSE	FALSE	TRUE	86	598.412	35.1181	56.1054	38.6082	-3.93387	-2.49221	404	37.9254	-5.62134	-3.6742	53	36.5089	-5.09106	-2.40371	124	35.662
PV048_Serie1	48	1	F	47	Superior	DIESTRO	2017-05-19	58	170	20.0692	Fisioterapeuta	DE PIE	TRUE	INTENSO	FALSE						FALSE	TRUE	FALSE	FALSE	FALSE	FALSE	FALSE	FALSE	FALSE	FALSE	FALSE	TRUE	0	1465.87	73.147	124.364	64.7307	7.04897	0.566304	64	64.5569	4.68566	-0.304566	148	64.4012	7.02257	-0.772488	235	64.2706
PV048_Serie2	48	2	F	47	Superior	DIESTRO	2017-05-19	58	170	20.0692	Fisioterapeuta	DE PIE	TRUE	INTENSO	FALSE						FALSE	TRUE	FALSE	FALSE	FALSE	FALSE	FALSE	FALSE	FALSE	FALSE	FALSE	TRUE	0	1426.38	82.9293	121.244	64.6342	5.61746	-0.386204	117	64.401	5.2321	-1.70751	260	64.3015	3.8054	-1.05156	45	64.0487
PV049_Serie1	49	1	M	68	Superior	DIESTRO	2017-05-19	65	162	24.7676	Administración	SEDENTARIO	TRUE	MODERADO	FALSE						FALSE	TRUE	FALSE	FALSE	FALSE	FALSE	FALSE	FALSE	FALSE	FALSE	FALSE	FALSE	0	1087.74	16.8173	93.1889	51.42	1.84324	0.140414	1016	51.1736	1.12866	1.01723	681	51.1676	-1.02122	-2.47831	104	50.6506
PV049_Serie2	49	2	M	68	Superior	DIESTRO	2017-05-19	65	162	24.7676	Administración	SEDENTARIO	TRUE	MODERADO	FALSE						FALSE	TRUE	FALSE	FALSE	FALSE	FALSE	FALSE	FALSE	FALSE	FALSE	FALSE	FALSE	0	1070.07	21.4873	91.5303	50.1586	3.51554	3.22466	95	49.834	5.74673	5.2701	684	49.291	6.94802	3.73609	1340	48.922
PV050_Serie1	50	1	F	55	Superior	DIESTRO	2017-05-22	63	166	22.8625	Ama de casa	SEDENTARIO	TRUE	MODERADO	FALSE						FALSE	FALSE	FALSE	FALSE	FALSE	FALSE	FALSE	FALSE	FALSE	FALSE	FALSE	FALSE	0	1113.74	104.283	109.878	57.4888	0.29076	-1.166	46	53.6477	2.3653	-1.10327	192	52.8903	3.90136	1.2082	242	50.5214
PV050_Serie2	50	2	F	55	Superior	DIESTRO	2017-05-22	63	166	22.8625	Ama de casa	SEDENTARIO	TRUE	MODERADO	FALSE						FALSE	FALSE	FALSE	FALSE	FALSE	FALSE	FALSE	FALSE	FALSE	FALSE	FALSE	FALSE	0	1155.3	47.7396	107.077	56.8677	-7.15253	1.45495	155	56.4904	-7.36355	0.128521	264	56.4611	-4.12024	2.02006	57	56.1908
PV051_Serie1	51	1	M	33	Superior	DIESTRO	2017-05-22	98	168	34.7222	Abogado	SEDENTARIO	TRUE	LEVE	TRUE	2007-08-01					TRUE	FALSE	FALSE	FALSE	FALSE	FALSE	FALSE	FALSE	FALSE	FALSE	FALSE	FALSE	1	2259.34	30.7477	66.7597	24.8094	4.36324	-1.46199	923	21.6595	0.0605674	-4.37172	62	21.0679	5.28662	-1.77245	1018	20.1813
PV051_Serie2	51	2	M	33	Superior	DIESTRO	2017-05-22	98	168	34.7222	Abogado	SEDENTARIO	TRUE	LEVE	TRUE	2007-08-01					TRUE	FALSE	FALSE	FALSE	FALSE	FALSE	FALSE	FALSE	FALSE	FALSE	FALSE	FALSE	1	753.886	29.9161	58.2232	20.6509	3.02663	-2.51392	317	20.1247	4.02139	-1.08586	49	18.3767	2.11096	-4.06678	230	16.6038
PV052_Serie1	52	1	F	43	Superior	DIESTRO	2017-05-22	67	164	24.9108	Redactora	SEDENTARIO	FALSE		FALSE						FALSE	FALSE	FALSE	FALSE	FALSE	FALSE	FALSE	FALSE	FALSE	FALSE	FALSE	FALSE	0	1636.62	47.1921	141.731	71.6624	1.19546	0.351778	355	71.0393	0.317367	0.600222	792	70.0483	1.24909	0.848101	507	70.0423
PV052_Serie2	52	2	F	43	Superior	DIESTRO	2017-05-22	67	164	24.9108	Redactora	SEDENTARIO	FALSE		FALSE						FALSE	FALSE	FALSE	FALSE	FALSE	FALSE	FALSE	FALSE	FALSE	FALSE	FALSE	FALSE	0	1324.85	46.3235	132.263	60.6907	1.79875	-1.5482	282	60.2968	1.6594	-2.04607	567	59.4135	1.14339	-1.94196	420	53.1699
PV053_Serie1	53	1	F	52	Medio	DIESTRO	2017-05-23	109	171	37.2764	Conductora	SEDENTARIO	TRUE	LEVE	TRUE	2017-02-25	FRONTAL	C	SUBAGUDO (3-6 meses desde aparición)	FRECUENTE	TRUE	TRUE	FALSE	FALSE	TRUE	FALSE	TRUE	FALSE	FALSE	FALSE	TRUE	TRUE	47	826.099	30.2379	72.6489	32.8015	3.34079	3.10063	268	31.769	0.269851	-0.0898484	702	31.1374	1.87846	2.80591	379	29.5125
PV053_Serie2	53	2	F	52	Medio	DIESTRO	2017-05-23	109	171	37.2764	Conductora	SEDENTARIO	TRUE	LEVE	TRUE	2017-02-25	FRONTAL	C	SUBAGUDO (3-6 meses desde aparición)	FRECUENTE	TRUE	TRUE	FALSE	FALSE	TRUE	FALSE	TRUE	FALSE	FALSE	FALSE	TRUE	TRUE	47	749.839	36.6849	75.0937	32.8197	-0.262727	0.996675	553	30.8366	-0.4523	2.85994	201	30.3376	0.288121	0.602879	462	28.2593
PV054_Serie1	54	1	F	48	Medio	DIESTRO	2017-05-23	66	155	27.4714	Camarera	DE PIE	TRUE	MODERADO	TRUE	1997-02-01			CRONICO (>6 meses desde aparición)	FRECUENTE	FALSE	TRUE	FALSE	FALSE	FALSE	FALSE	TRUE	TRUE	FALSE	FALSE	FALSE	TRUE	56	1247.44	44.7433	116.381	64.1429	-5.4017	-8.0549	255	63.769	-3.89129	-7.08374	98	62.2959	-4.0174	-7.27052	519	61.8261
PV054_Serie2	54	2	F	48	Medio	DIESTRO	2017-05-23	66	155	27.4714	Camarera	DE PIE	TRUE	MODERADO	TRUE	1997-02-01			CRONICO (>6 meses desde aparición)	FRECUENTE	FALSE	TRUE	FALSE	FALSE	FALSE	FALSE	TRUE	TRUE	FALSE	FALSE	FALSE	TRUE	56	1179.22	48.8899	111.836	64.1348	-0.475053	-4.29605	76	62.6151	-1.62117	-5.75457	193	61.947	-1.12811	-7.62024	306	61.1823
PV055_Serie1	55	1	F	27	Medio	AMBIDIESTRO	2017-05-23	64	165	23.5078			FALSE		TRUE	2017-03-18	LATERAL IZQUIERDO	A			FALSE	TRUE	FALSE	FALSE	FALSE	FALSE	TRUE	FALSE	FALSE	FALSE	FALSE	TRUE	13	1580.2	68.1121	130.664	64.3238	0.15353	-2.73089	561	62.4713	1.82462	0.728677	395	62.3165	3.28573	-0.624833	480	60.4985
PV055_Serie2	55	2	F	27	Medio	AMBIDIESTRO	2017-05-23	64	165	23.5078			FALSE		TRUE	2017-03-18	LATERAL IZQUIERDO	A			FALSE	TRUE	FALSE	FALSE	FALSE	FALSE	TRUE	FALSE	FALSE	FALSE	FALSE	TRUE	13	1229.71	58.6693	108.427	58.8887	-0.692798	-1.9095	321	58.6419	-0.151396	-2.31281	575	57.6935	2.35839	-1.31783	51	54.3236
PV056_Serie1	56	1	F	36	Superior	DIESTRO	2017-05-24	80	170	27.6817	Administrativo	SEDENTARIO	FALSE		FALSE				CRONICO (>6 meses desde aparición)	FRECUENTE	FALSE	TRUE	FALSE	FALSE	TRUE	FALSE	FALSE	FALSE	FALSE	FALSE	TRUE	TRUE	79	1174.89	51.6207	101.323	43.802	1.94357	-2.59856	631	43.3982	2.3417	-3.50791	544	42.6413	2.35612	-2.88352	448	42.0116
PV056_Serie2	56	2	F	36	Superior	DIESTRO	2017-05-24	80	170	27.6817	Administrativo	SEDENTARIO	FALSE		FALSE				CRONICO (>6 meses desde aparición)	FRECUENTE	FALSE	TRUE	FALSE	FALSE	TRUE	FALSE	FALSE	FALSE	FALSE	FALSE	TRUE	TRUE	79	1138.64	58.2128	96.694	43.5069	1.11006	-2.79846	465	43.305	1.78418	-2.95531	305	43.2559	2.32475	-2.21077	225	42.898
PV057_Serie1	57	1	M	38	Medio	DIESTRO	2017-05-26	72	165	26.4463	Administrativo	SEDENTARIO	FALSE		FALSE				AGUDO (<3meses desde aparición)	ESPORADICO	FALSE	TRUE	FALSE	FALSE	FALSE	FALSE	FALSE	FALSE	FALSE	FALSE	FALSE	FALSE	3	1057.03	40.7178	93.0804	61.0268	5.31824	-0.710934	59	60.3101	3.5889	0.196093	168	60.0233	5.49976	1.18116	284	59.7858
PV057_Serie2	57	2	M	38	Medio	DIESTRO	2017-05-26	72	165	26.4463	Administrativo	SEDENTARIO	FALSE		FALSE				AGUDO (<3meses desde aparición)	ESPORADICO	FALSE	TRUE	FALSE	FALSE	FALSE	FALSE	FALSE	FALSE	FALSE	FALSE	FALSE	FALSE	3	985.642	27.843	88.8488	56.1785	-4.88587	-2.28103	81	53.6177	-4.55881	-1.85896	966	52.0047	-3.59242	-1.7966	246	51.7942
PV058_Serie1	58	1	M	42	Superior	DIESTRO	2017-05-26	63	170	21.7993	Pintor artistico	SEDENTARIO	TRUE	INTENSO	FALSE						FALSE	FALSE	FALSE	FALSE	FALSE	FALSE	FALSE	FALSE	FALSE	FALSE	FALSE	FALSE	0	1487.28	78.9428	127.413	71.1714	8.65869	-3.46305	125	71.1713	11.539	-3.67849	202	70.2161	8.37355	-4.47493	284	69.5671
PV058_Serie2	58	2	M	42	Superior	DIESTRO	2017-05-26	63	170	21.7993	Pintor artistico	SEDENTARIO	TRUE	INTENSO	FALSE						FALSE	FALSE	FALSE	FALSE	FALSE	FALSE	FALSE	FALSE	FALSE	FALSE	FALSE	FALSE	0	1155.43	73.5009	124.876	72.1396	5.49356	-5.0493	223	71.7586	7.37729	-3.44321	381	71.0694	4.24334	-2.64248	51	70.9219
PV059_Serie1	59	1	M	44	Superior	DIESTRO	2017-05-26	71	170	24.5675	Fisioterapeuta	DE PIE	TRUE	MODERADO	FALSE						FALSE	FALSE	FALSE	FALSE	FALSE	FALSE	TRUE	FALSE	FALSE	FALSE	FALSE	FALSE	25	1317.83	92.5444	123.195	53.3384	1.3338	-0.213614	369	52.8963	1.74457	0.154528	308	52.6243	0.874862	0.0896544	247	52.2497
PV059_Serie2	59	2	M	44	Superior	DIESTRO	2017-05-26	71	170	24.5675	Fisioterapeuta	DE PIE	TRUE	MODERADO	FALSE						FALSE	FALSE	FALSE	FALSE	FALSE	FALSE	TRUE	FALSE	FALSE	FALSE	FALSE	FALSE	25	1269.58	120.683	124.148	51.1398	-3.05976	-3.73059	197	51.0091	0.145869	-2.12859	102	49.8337	-0.682019	-2.53202	244	49.3591
PV060_Serie1	60	1	F	36	Superior	DIESTRO	2017-05-26	64	153	27.3399	Administrativa	SEDENTARIO	TRUE	MODERADO	FALSE				CRONICO (>6 meses desde aparición)	DISCONTINUO	TRUE	TRUE	FALSE	FALSE	TRUE	FALSE	TRUE	FALSE	FALSE	FALSE	FALSE	TRUE	47	1252.09	76.1612	116.476	67.7332	5.39674	-0.93892	354	67.4641	-2.26644	-2.64554	129	67.0218	0.864465	-1.63931	285	66.9247
PV060_Serie2	60	2	F	36	Superior	DIESTRO	2017-05-26	64	153	27.3399	Administrativa	SEDENTARIO	TRUE	MODERADO	FALSE				CRONICO (>6 meses desde aparición)	DISCONTINUO	TRUE	TRUE	FALSE	FALSE	TRUE	FALSE	TRUE	FALSE	FALSE	FALSE	FALSE	TRUE	47	1228.48	88.507	114.986	67.5959	-2.23211	-3.67789	363	65.6253	-3.62681	-1.67805	115	64.7826	-1.91162	-4.48422	183	64.6703
PV061_Serie1	61	1	F	54	Superior	DIESTRO	2017-05-26	50	156	20.5457	Investigadora	SEDENTARIO	TRUE	MODERADO	FALSE						FALSE	FALSE	FALSE	FALSE	FALSE	FALSE	FALSE	FALSE	FALSE	FALSE	FALSE	FALSE	1	1602.31	68.1255	135.644	70.4883	1.89728	-1.51118	669	70.0097	1.15473	-1.79174	387	69.9246	1.73429	-1.17028	575	69.8983
PV061_Serie2	61	2	F	54	Superior	DIESTRO	2017-05-26	50	156	20.5457	Investigadora	SEDENTARIO	TRUE	MODERADO	FALSE						FALSE	FALSE	FALSE	FALSE	FALSE	FALSE	FALSE	FALSE	FALSE	FALSE	FALSE	FALSE	1	1441.89	59.1907	133.375	72.1616	2.13252	0.713128	318	71.9457	3.43795	0.688882	200	71.0657	3.38502	2.05639	639	70.4399
PV062_Serie1	62	1	F	63	Medio	DIESTRO	2017-05-29	50	160	19.5312	Funcionaria	SEDENTARIO	TRUE	MODERADO	FALSE				CRONICO (>6 meses desde aparición)	ESPORADICO	FALSE	TRUE	FALSE	FALSE	FALSE	FALSE	FALSE	FALSE	FALSE	FALSE	FALSE	FALSE	21	1144.12	73.5297	107.705	52.0128	-0.343832	-0.033983	117	50.6972	1.59647	0.61053	260	50.3996	3.33485	2.62165	332	49.664
PV062_Serie2	62	2	F	63	Medio	DIESTRO	2017-05-29	50	160	19.5312	Funcionaria	SEDENTARIO	TRUE	MODERADO	FALSE				CRONICO (>6 meses desde aparición)	ESPORADICO	FALSE	TRUE	FALSE	FALSE	FALSE	FALSE	FALSE	FALSE	FALSE	FALSE	FALSE	FALSE	21	1125.69	64.5463	104.712	49.0877	0.0576903	0.498396	288	48.563	0.266663	2.27798	445	48.1721	-1.46667	0.369199	206	48.0617
PV063_Serie1	63	1	F	47	Básico	DIESTRO	2017-05-29	54	160	21.0937	Administrativa	SEDENTARIO	TRUE	LEVE	FALSE				CRONICO (>6 meses desde aparición)	FRECUENTE	TRUE	TRUE	FALSE	FALSE	FALSE	FALSE	TRUE	FALSE	FALSE	FALSE	TRUE	FALSE	25	1084.74	50.4063	101.888	54.8826	0.334258	4.45173	544	54.5333	-3.41535	0.463816	260	54.2666	0.534971	4.05885	456	53.3845
PV063_Serie2	63	2	F	47	Básico	DIESTRO	2017-05-29	54	160	21.0937	Administrativa	SEDENTARIO	TRUE	LEVE	FALSE				CRONICO (>6 meses desde aparición)	FRECUENTE	TRUE	TRUE	FALSE	FALSE	FALSE	FALSE	TRUE	FALSE	FALSE	FALSE	TRUE	FALSE	25	1031.33	60.2414	99.2735	51.126	-1.4516	2.19931	300	51.1166	0.15764	2.36831	375	50.9598	-2.9917	1.66968	454	50.1869
PV064_Serie1	64	1	F	65	Superior	DIESTRO	2017-05-29	64	164	23.7954	Médico	SEDENTARIO	TRUE	INTENSO	FALSE				CRONICO (>6 meses desde aparición)	ESPORADICO	FALSE	FALSE	FALSE	TRUE	FALSE	FALSE	FALSE	FALSE	FALSE	FALSE	FALSE	FALSE	0	1272.65	38.7531	108.54	53.1435	-6.28904	-0.330764	72	52.9659	-8.17817	-0.540234	604	52.3631	-8.17091	-1.58194	194	52.2819
PV064_Serie2	64	2	F	65	Superior	DIESTRO	2017-05-29	64	164	23.7954	Médico	SEDENTARIO	TRUE	INTENSO	FALSE				CRONICO (>6 meses desde aparición)	ESPORADICO	FALSE	FALSE	FALSE	TRUE	FALSE	FALSE	FALSE	FALSE	FALSE	FALSE	FALSE	FALSE	0	1141.6	52.4633	105.616	48.1174	-5.35545	-2.83221	151	47.4971	-3.67235	-3.15199	558	47.4309	-2.93661	-1.63325	248	47.4138
PV065_Serie1	65	1	F	79	Básico	DIESTRO	2017-05-29	60	155	24.974	Limpieza	MODERADO	TRUE	MODERADO	FALSE						FALSE	FALSE	FALSE	FALSE	FALSE	FALSE	FALSE	FALSE	FALSE	FALSE	FALSE	FALSE	0	1149.11	65.1425	107.637	55.8425	-0.255066	1.58121	228	55.6918	0.192953	1.60532	467	55.536	1.08917	2.56821	144	55.0812
PV065_Serie2	65	2	F	79	Básico	DIESTRO	2017-05-29	60	155	24.974	Limpieza	MODERADO	TRUE	MODERADO	FALSE						FALSE	FALSE	FALSE	FALSE	FALSE	FALSE	FALSE	FALSE	FALSE	FALSE	FALSE	FALSE	0	1120.45	67.3346	105.852	59.0495	-2.70248	2.07991	221	58.3826	-1.77895	2.27791	142	58.2174	-2.28722	2.97703	66	56.0394
PV066_Serie1	66	1	M	34	Medio	DIESTRO	2017-05-30	80	184	23.6295	Soldador	DE PIE	TRUE	LEVE	FALSE						FALSE	FALSE	FALSE	FALSE	FALSE	FALSE	TRUE	FALSE	FALSE	FALSE	FALSE	FALSE	0	1232.4	72.1544	106.936	58.0906	5.96045	2.52841	360	56.4328	6.61987	2.49924	429	55.9098	5.95892	1.82584	283	55.0653
PV066_Serie2	66	2	M	34	Medio	DIESTRO	2017-05-30	80	184	23.6295	Soldador	DE PIE	TRUE	LEVE	FALSE						FALSE	FALSE	FALSE	FALSE	FALSE	FALSE	TRUE	FALSE	FALSE	FALSE	FALSE	FALSE	0	1113.58	98.0261	105.362	56.1071	4.89153	-0.973538	210	55.2525	6.49357	-0.386724	311	55.0783	5.71991	0.365343	259	54.9582
PV068_Serie1	68	1	F	51	Superior	DIESTRO	2017-05-30	65	165	23.8751	Maitre		TRUE	MODERADO	FALSE				CRONICO (>6 meses desde aparición)	FRECUENTE	FALSE	TRUE	FALSE	FALSE	FALSE	FALSE	FALSE	FALSE	FALSE	FALSE	FALSE	FALSE	22	1276.49	56.6827	118.625	59.6162	-5.42959	2.28017	587	58.0482	-6.41211	0.464713	387	58.0329	-6.0936	1.04324	488	57.9688
PV068_Serie2	68	2	F	51	Superior	DIESTRO	2017-05-30	65	165	23.8751	Maitre		TRUE	MODERADO	FALSE				CRONICO (>6 meses desde aparición)	FRECUENTE	FALSE	TRUE	FALSE	FALSE	FALSE	FALSE	FALSE	FALSE	FALSE	FALSE	FALSE	FALSE	22	1418.37	65.4228	120.843	62.0183	-9.93364	-0.916968	245	61.8792	-12.5167	-1.97821	151	61.7075	-11.2045	-0.131221	61	61.6526
PV069_Serie1	69	1	F	25	Superior	DIESTRO	2017-05-30	72	184	21.2665	Estudiante	SEDENTARIO	TRUE	INTENSO	FALSE				CRONICO (>6 meses desde aparición)	FRECUENTE	FALSE	TRUE	FALSE	FALSE	FALSE	FALSE	TRUE	FALSE	FALSE	FALSE	FALSE	FALSE	17	1600.58	48.0367	135.938	60.9998	-0.17218	-1.58769	368	60.7746	0.144206	-0.538038	222	60.1677	1.33903	0.311847	911	58.9768
PV069_Serie2	69	2	F	25	Superior	DIESTRO	2017-05-30	72	184	21.2665	Estudiante	SEDENTARIO	TRUE	INTENSO	FALSE				CRONICO (>6 meses desde aparición)	FRECUENTE	FALSE	TRUE	FALSE	FALSE	FALSE	FALSE	TRUE	FALSE	FALSE	FALSE	FALSE	FALSE	17	1616.36	51.4109	139.033	64.5529	1.63081	-0.0389685	334	63.8555	0.970594	0.0308957	199	63.5686	2.9112	-0.0348059	608	63.108
PV070_Serie1	70	1	M	60	Superior	DIESTRO	2017-06-02	91	172	30.7599	Ingeniero	SEDENTARIO	FALSE		FALSE				CRONICO (>6 meses desde aparición)	FRECUENTE	FALSE	TRUE	FALSE	TRUE	FALSE	FALSE	TRUE	FALSE	FALSE	FALSE	FALSE	FALSE	0	991.48	47.3939	85.7823	52.1073	0.536894	0.199005	303	51.4169	-1.08415	-1.31152	387	51.2366	0.725838	-1.45471	134	50.9225
PV070_Serie2	70	2	M	60	Superior	DIESTRO	2017-06-02	91	172	30.7599	Ingeniero	SEDENTARIO	FALSE		FALSE				CRONICO (>6 meses desde aparición)	FRECUENTE	FALSE	TRUE	FALSE	TRUE	FALSE	FALSE	TRUE	FALSE	FALSE	FALSE	FALSE	FALSE	0	976.71	42.6884	85.8287	53.0941	1.04484	0.607563	331	52.6737	3.08889	2.41103	144	52.5156	2.3144	1.23326	240	52.5155
PV071_Serie1	71	1	F	52	Básico	DIESTRO	2017-06-02	72	170	24.9135	Monitora de comedor	MUY PESADO	FALSE		TRUE	2017-02-13	C	C	SUBAGUDO (3-6 meses desde aparición)	FRECUENTE	TRUE	TRUE	FALSE	FALSE	TRUE	FALSE	TRUE	FALSE	FALSE	FALSE	FALSE	FALSE	60	1128.11	38.319	96.0529	47.5083	-2.91823	-1.94317	602	47.429	-2.21534	-2.58842	358	46.9323	-1.55641	-3.10661	219	46.6761
PV071_Serie2	71	2	F	52	Básico	DIESTRO	2017-06-02	72	170	24.9135	Monitora de comedor	MUY PESADO	FALSE		TRUE	2017-02-13	C	C	SUBAGUDO (3-6 meses desde aparición)	FRECUENTE	TRUE	TRUE	FALSE	FALSE	TRUE	FALSE	TRUE	FALSE	FALSE	FALSE	FALSE	FALSE	60	1081.29	42.1061	92.389	47.1401	-1.34014	-1.62946	387	46.7073	-0.63776	0.038174	177	46.4819	-1.82914	0.378751	716	46.3751
PV072_Serie1	72	1	F	48	Medio	DIESTRO	2017-06-02	68	171	23.255	Auxiliar de enfermeria	MUY PESADO	TRUE	MODERADO	FALSE				CRONICO (>6 meses desde aparición)	FRECUENTE	FALSE	TRUE	FALSE	FALSE	FALSE	FALSE	TRUE	FALSE	FALSE	FALSE	TRUE	TRUE	10	1130.68	73.8042	108.28	47.1499	-5.50736	-3.0458	45	45.1172	-2.0749	-3.18943	111	44.4931	-3.4685	-1.43453	388	44.2619
PV072_Serie2	72	2	F	48	Medio	DIESTRO	2017-06-02	68	171	23.255	Auxiliar de enfermeria	MUY PESADO	TRUE	MODERADO	FALSE				CRONICO (>6 meses desde aparición)	FRECUENTE	FALSE	TRUE	FALSE	FALSE	FALSE	FALSE	TRUE	FALSE	FALSE	FALSE	TRUE	TRUE	10	1089.13	80.0833	106.026	54.4	-6.44433	-4.87933	52	53.0895	-3.13894	-3.6065	233	52.181	-4.51319	-3.90948	174	52.1363
PV073_Serie1	73	1	M	43	Medio	DIESTRO	2017-06-02	80	185	23.3747	Dependiente	DE PIE	FALSE		FALSE						FALSE	FALSE	FALSE	FALSE	FALSE	FALSE	FALSE	FALSE	FALSE	FALSE	FALSE	TRUE	0	1549.57	93.7995	134.49	65.5699	-2.77008	-0.79775	393	64.9435	-1.30014	-0.495177	464	63.1402	-3.24558	-0.487014	252	63.0976
PV073_Serie2	73	2	M	43	Medio	DIESTRO	2017-06-02	80	185	23.3747	Dependiente	DE PIE	FALSE		FALSE						FALSE	FALSE	FALSE	FALSE	FALSE	FALSE	FALSE	FALSE	FALSE	FALSE	FALSE	TRUE	0	1369.05	88.4397	128.985	63.2937	3.19205	0.614993	394	63.0974	1.16321	1.0839	320	61.9105	0.492916	0.428374	43	61.143
PV074_Serie1	74	1	F	68	Superior	DIESTRO	2017-06-05	53	163	19.9481	Médico	SEDENTARIO	TRUE	LEVE	FALSE				AGUDO (<3meses desde aparición)	ESPORADICO	FALSE	TRUE	FALSE	FALSE	TRUE	FALSE	FALSE	FALSE	FALSE	FALSE	FALSE	FALSE	3	989.452	25.4489	88.7634	52.328	0.386908	-1.43824	606	50.8103	0.413691	-1.46597	90	50.7573	2.06722	-0.564066	280	48.6433
PV074_Serie2	74	2	F	68	Superior	DIESTRO	2017-06-05	53	163	19.9481	Médico	SEDENTARIO	TRUE	LEVE	FALSE				AGUDO (<3meses desde aparición)	ESPORADICO	FALSE	TRUE	FALSE	FALSE	TRUE	FALSE	FALSE	FALSE	FALSE	FALSE	FALSE	FALSE	3	956.708	29.1679	83.9734	50.9945	2.96221	-0.755708	509	50.4465	2.67441	-1.17475	89	47.8771	3.36261	-1.99989	373	47.1943
PV075_Serie1	75	1	F	54	Superior	DIESTRO	2017-06-05	61	160	23.8281	Profesora	MODERADO	TRUE	LEVE	FALSE				CRONICO (>6 meses desde aparición)	DISCONTINUO	TRUE	TRUE	FALSE	FALSE	FALSE	FALSE	FALSE	TRUE	FALSE	FALSE	TRUE	TRUE	29	1196.1	57.9504	114.077	54.7926	-4.2306	-2.96697	537	52.8569	-4.16938	-3.79872	256	52.7657	-3.00813	-3.77973	161	52.2371
PV075_Serie2	75	2	F	54	Superior	DIESTRO	2017-06-05	61	160	23.8281	Profesora	MODERADO	TRUE	LEVE	FALSE				CRONICO (>6 meses desde aparición)	DISCONTINUO	TRUE	TRUE	FALSE	FALSE	FALSE	FALSE	FALSE	TRUE	FALSE	FALSE	TRUE	TRUE	29	1146.5	70.2515	108.938	57.8489	-0.991698	-2.00728	300	57.6494	-1.25665	-3.25269	446	56.5745	-0.294946	-2.77974	373	55.9309
PV076_Serie1	76	1	F	38	Superior	DIESTRO	2017-06-06	56	171	19.1512	Fisioterapeuta	DE PIE	TRUE	MODERADO	FALSE						FALSE	TRUE	FALSE	FALSE	FALSE	FALSE	FALSE	FALSE	FALSE	FALSE	FALSE	FALSE	0	1258.36	29.7625	106.765	50.3713	-4.72227	-2.82094	1141	49.8149	-5.75114	-3.69872	789	49.8039	-4.04151	-2.07918	609	49.677
PV076_Serie2	76	2	F	38	Superior	DIESTRO	2017-06-06	56	171	19.1512	Fisioterapeuta	DE PIE	TRUE	MODERADO	FALSE						FALSE	TRUE	FALSE	FALSE	FALSE	FALSE	FALSE	FALSE	FALSE	FALSE	FALSE	FALSE	0	1250.14	28.885	106.35	51.3721	-5.93771	-6.86653	604	51.1185	-5.07375	-5.20585	428	50.7736	-4.50896	-5.82242	785	50.7212
PV077_Serie1	77	1	M	29	Superior	DIESTRO	2017-06-06	97	178	30.6148	Abogado	SEDENTARIO	FALSE		FALSE				CRONICO (>6 meses desde aparición)	FRECUENTE	TRUE	TRUE	FALSE	FALSE	FALSE	FALSE	FALSE	FALSE	FALSE	FALSE	FALSE	TRUE	17	1080.52	30.7666	91.8565	50.1907	4.8051	1.64171	427	50.161	4.16191	0.265681	968	49.6848	3.73842	0.903183	268	49.1724
PV077_Serie2	77	2	M	29	Superior	DIESTRO	2017-06-06	97	178	30.6148	Abogado	SEDENTARIO	FALSE		FALSE				CRONICO (>6 meses desde aparición)	FRECUENTE	TRUE	TRUE	FALSE	FALSE	FALSE	FALSE	FALSE	FALSE	FALSE	FALSE	FALSE	TRUE	17	1116.69	30.1157	94.6714	47.0649	5.45855	2.06551	722	47.0526	4.95543	2.17855	568	46.6413	7.49921	1.13773	1014	46.3489
PV078_Serie1	78	1	F	63	Superior	DIESTRO	2017-06-06	61	153	26.0584	Médico	DE PIE	TRUE	MODERADO	FALSE						FALSE	TRUE	FALSE	FALSE	FALSE	FALSE	FALSE	FALSE	FALSE	FALSE	FALSE	FALSE	0	1109.29	73.1723	105.356	52.1566	0.617655	-3.54606	352	51.3933	2.24014	-2.97955	285	51.1822	-0.108056	-2.53508	141	50.5295
PV078_Serie2	78	2	F	63	Superior	DIESTRO	2017-06-06	61	153	26.0584	Médico	DE PIE	TRUE	MODERADO	FALSE						FALSE	TRUE	FALSE	FALSE	FALSE	FALSE	FALSE	FALSE	FALSE	FALSE	FALSE	FALSE	0	1093.57	66.1966	101.571	59.0789	-3.29227	-4.9249	52	59.0499	-0.869878	-5.33027	214	58.3964	-2.37145	-4.17268	437	58.1832
PV079_Serie1	79	1	F	50	Medio	DIESTRO	2017-06-06	59	160	23.0469	Recepcionista	SEDENTARIO	TRUE	MODERADO	TRUE	2017-05-11					FALSE	TRUE	FALSE	FALSE	FALSE	FALSE	FALSE	FALSE	FALSE	FALSE	FALSE	TRUE	9	1176.27	35.9935	101.424	59.2469	3.88493	-1.01613	245	58.7624	2.44635	-3.31442	78	58.111	9.38083	0.954908	392	57.057
PV079_Serie2	79	2	F	50	Medio	DIESTRO	2017-06-06	59	160	23.0469	Recepcionista	SEDENTARIO	TRUE	MODERADO	TRUE	2017-05-11					FALSE	TRUE	FALSE	FALSE	FALSE	FALSE	FALSE	FALSE	FALSE	FALSE	FALSE	TRUE	9	1187.4	45.3897	102.195	65.5256	2.92017	-0.954203	177	65.3199	2.14029	-1.27363	293	63.955	1.47935	-2.44287	61	63.3734
PV080_Serie1	80	1	F	37	Medio	DIESTRO	2017-06-06	52	160	20.3125	Auxiliar de farmacia	DE PIE	TRUE	INTENSO	FALSE						FALSE	TRUE	FALSE	FALSE	FALSE	FALSE	FALSE	FALSE	FALSE	FALSE	FALSE	FALSE	2	1552.22	67.8419	133.636	63.8508	-1.20227	1.09698	623	63.3097	-0.988529	0.729185	139	62.9259	-2.11636	0.568609	337	62.7371
PV080_Serie2	80	2	F	37	Medio	DIESTRO	2017-06-06	52	160	20.3125	Auxiliar de farmacia	DE PIE	TRUE	INTENSO	FALSE						FALSE	TRUE	FALSE	FALSE	FALSE	FALSE	FALSE	FALSE	FALSE	FALSE	FALSE	FALSE	2	1362.86	89.4267	128.385	58.6495	-6.62532	-2.79333	116	58.539	-4.92649	-1.78213	185	57.8654	-5.16139	-1.32758	256	57.6491
PV081_Serie1	81	1	F	62	Básico	DIESTRO	2017-06-07	66	160	25.7812	Ama de casa	MODERADO	TRUE	MODERADO	FALSE				SUBAGUDO (3-6 meses desde aparición)	FRECUENTE	FALSE	TRUE	FALSE	FALSE	FALSE	FALSE	FALSE	FALSE	FALSE	FALSE	FALSE	FALSE	11	1077.32	29.6947	93.7433	50.5962	-6.13736	-8.00341	226	49.7896	-4.88888	-7.68805	979	49.6385	-5.07793	-7.78998	536	49.547
PV081_Serie2	81	2	F	62	Básico	DIESTRO	2017-06-07	66	160	25.7812	Ama de casa	MODERADO	TRUE	MODERADO	FALSE				SUBAGUDO (3-6 meses desde aparición)	FRECUENTE	FALSE	TRUE	FALSE	FALSE	FALSE	FALSE	FALSE	FALSE	FALSE	FALSE	FALSE	FALSE	11	1043.22	31.2717	91.0157	54.9936	-2.57238	-4.7991	209	54.4926	-3.43448	-4.27034	494	53.8512	-2.61493	-4.12256	631	52.9734
PV082_Serie1	82	1	M	69	Medio	DIESTRO	2017-06-07	73	175	23.8367	Jubilado		TRUE	LEVE	FALSE				AGUDO (<3meses desde aparición)		FALSE	TRUE	FALSE	FALSE	TRUE	FALSE	FALSE	TRUE	FALSE	FALSE	TRUE	TRUE	39	1148.55	20.8979	98.2441	53.9094	1.81399	-2.52827	1469	53.0463	0.829454	-4.94063	1226	52.9466	1.43337	-2.53817	760	52.9418
PV082_Serie2	82	2	M	69	Medio	DIESTRO	2017-06-07	73	175	23.8367	Jubilado		TRUE	LEVE	FALSE				AGUDO (<3meses desde aparición)		FALSE	TRUE	FALSE	FALSE	TRUE	FALSE	FALSE	TRUE	FALSE	FALSE	TRUE	TRUE	39	1139.13	17.6227	98.6123	56.7951	2.0433	-4.30054	1714	56.6467	0.731643	-4.38528	1428	55.0284	1.39985	-2.7006	863	54.5911
PV083_Serie1	83	1	M	26	Superior	AMBIDIESTRO	2017-06-07	70	184	20.6758	Taxista	SEDENTARIO	FALSE		TRUE	2017-05-04	LATERAL IZQUIERDO	A	AGUDO (<3meses desde aparición)		FALSE	TRUE	FALSE	FALSE	TRUE	FALSE	FALSE	FALSE	FALSE	FALSE	FALSE	FALSE	34	1482.18	21.0656	130.508	69.6725	4.02033	-1.71284	102	68.4114	1.58688	-1.69075	1542	68.2821	1.74347	-0.897974	1861	68.0808
PV083_Serie2	83	2	M	26	Superior	AMBIDIESTRO	2017-06-07	70	184	20.6758	Taxista	SEDENTARIO	FALSE		TRUE	2017-05-04	LATERAL IZQUIERDO	A	AGUDO (<3meses desde aparición)		FALSE	TRUE	FALSE	FALSE	TRUE	FALSE	FALSE	FALSE	FALSE	FALSE	FALSE	FALSE	34	1343.43	23.2428	118.471	56.2151	4.31177	-3.95399	1074	55.9448	3.79991	-3.15712	99	55.2933	3.07961	-4.61757	1544	54.1435
PV084_Serie1	84	1	M	38	Superior	ZURDO	2017-06-09	72	170	24.9135	Productor cultural	SEDENTARIO	FALSE		FALSE						FALSE	TRUE	FALSE	FALSE	FALSE	FALSE	FALSE	FALSE	FALSE	FALSE	FALSE	FALSE	0	1085.67	52.0957	93.9488	56.0162	-1.55143	-1.02327	54	55.0794	2.08059	-0.85091	409	54.9713	1.59656	-1.33781	319	54.9039
PV084_Serie2	84	2	M	38	Superior	ZURDO	2017-06-09	72	170	24.9135	Productor cultural	SEDENTARIO	FALSE		FALSE						FALSE	TRUE	FALSE	FALSE	FALSE	FALSE	FALSE	FALSE	FALSE	FALSE	FALSE	FALSE	0	1095.26	65.8211	96.2899	58.5086	2.63405	0.0052536	362	57.4565	1.88299	0.582965	82	57.0163	0.878737	-2.27487	432	55.2325
PV085_Serie1	85	1	M	64	Superior	DIESTRO	2017-06-09	100	180	30.8642	Gerente	SEDENTARIO	TRUE	MODERADO	TRUE	2006-01-15	E	C			FALSE	TRUE	FALSE	FALSE	FALSE	TRUE	FALSE	FALSE	FALSE	FALSE	FALSE	FALSE	0	936.126	45.355	85.4969	52.061	3.67873	-2.89055	137	50.5838	2.06162	-2.50521	54	47.2914	5.09173	0.98156	319	47.251
PV085_Serie2	85	2	M	64	Superior	DIESTRO	2017-06-09	100	180	30.8642	Gerente	SEDENTARIO	TRUE	MODERADO	TRUE	2006-01-15	E	C			FALSE	TRUE	FALSE	FALSE	FALSE	TRUE	FALSE	FALSE	FALSE	FALSE	FALSE	FALSE	0	853.622	48.7227	81.096	46.9904	-0.415522	1.46603	219	46.1331	1.29246	-1.00299	55	44.9731	2.31901	2.09575	300	44.9222
PV086_Serie1	86	1	F	20	Superior	DIESTRO	2017-06-12	57	163	21.4536	Gestora	SEDENTARIO	FALSE		TRUE	2017-05-19	FRONTAL	C	AGUDO (<3meses desde aparición)	FRECUENTE	TRUE	TRUE	FALSE	FALSE	FALSE	FALSE	TRUE	FALSE	FALSE	FALSE	FALSE	FALSE	44	1113.91	57.5369	107.636	54.7727	-3.49905	6.1405	329	54.211	-4.34497	1.89408	408	53.9919	-5.3657	-2.16677	143	52.0197
PV086_Serie2	86	2	F	20	Superior	DIESTRO	2017-06-12	57	163	21.4536	Gestora	SEDENTARIO	FALSE		TRUE	2017-05-19	FRONTAL	C	AGUDO (<3meses desde aparición)	FRECUENTE	TRUE	TRUE	FALSE	FALSE	FALSE	FALSE	TRUE	FALSE	FALSE	FALSE	FALSE	FALSE	44	1043.04	52.1521	102.908	49.2769	-5.97634	-0.0590911	250	48.5483	-6.88303	0.210833	422	48.1667	-6.10652	0.560628	337	47.2055
PV087_Serie1	87	1	M	26	Superior	DIESTRO	2017-06-12	75	185	21.9138	Diseñador gráfico	SEDENTARIO	TRUE	MODERADO	FALSE						FALSE	FALSE	FALSE	FALSE	FALSE	FALSE	FALSE	FALSE	FALSE	FALSE	FALSE	FALSE	0	1297.45	59.19	120.324	56.7793	1.29771	-2.70637	61	56.3337	2.75608	-0.849277	260	56.0728	2.98003	-1.08609	367	55.9991
PV087_Serie2	87	2	M	26	Superior	DIESTRO	2017-06-12	75	185	21.9138	Diseñador gráfico	SEDENTARIO	TRUE	MODERADO	FALSE						FALSE	FALSE	FALSE	FALSE	FALSE	FALSE	FALSE	FALSE	FALSE	FALSE	FALSE	FALSE	0	1420.56	78.2246	120.38	57.6404	3.14011	-2.43681	390	57.4226	3.69925	-3.591	318	56.7436	1.29363	-2.48268	241	56.7068
PV088_Serie1	88	1	F	54	Superior	DIESTRO	2017-06-12	64	179	19.9744	Directora de comunicación	SEDENTARIO	FALSE		FALSE				CRONICO (>6 meses desde aparición)	FRECUENTE	TRUE	TRUE	FALSE	FALSE	FALSE	FALSE	TRUE	FALSE	FALSE	FALSE	FALSE	FALSE	18	1515.18	46.997	135.497	57.5994	-4.54126	-7.45793	210	57.1038	-3.86587	-4.4105	354	56.2527	-2.62034	-4.27627	745	55.7948
PV088_Serie2	88	2	F	54	Superior	DIESTRO	2017-06-12	64	179	19.9744	Directora de comunicación	SEDENTARIO	FALSE		FALSE				CRONICO (>6 meses desde aparición)	FRECUENTE	TRUE	TRUE	FALSE	FALSE	FALSE	FALSE	TRUE	FALSE	FALSE	FALSE	FALSE	FALSE	18	1381.39	42.2701	124.25	59.719	-6.80315	-6.6603	880	57.9653	-5.94537	-7.30091	463	57.7566	-6.60216	-7.26319	326	57.593
PV089_Serie1	89	1	M	48	Superior	DIESTRO	2017-06-12	100	195	26.2985	Técnico nuclear	MODERADO	TRUE	INTENSO	FALSE				CRONICO (>6 meses desde aparición)	ESPORADICO	FALSE	TRUE	FALSE	FALSE	TRUE	FALSE	FALSE	FALSE	FALSE	FALSE	FALSE	FALSE	4	1510.84	46.8041	120.209	60.2254	-0.619332	1.0244	396	60.0129	-0.705119	-0.0959396	531	59.7501	0.406137	1.863	653	59.2995
PV089_Serie2	89	2	M	48	Superior	DIESTRO	2017-06-12	100	195	26.2985	Técnico nuclear	MODERADO	TRUE	INTENSO	FALSE				CRONICO (>6 meses desde aparición)	ESPORADICO	FALSE	TRUE	FALSE	FALSE	TRUE	FALSE	FALSE	FALSE	FALSE	FALSE	FALSE	FALSE	4	1312.27	46.6005	113.031	58.1536	-0.880651	-1.52479	177	57.7485	-1.21864	1.86829	533	57.1032	0.949741	1.5308	414	56.4015
PV090_Serie1	90	1	M	42	Superior	DIESTRO	2017-06-13	78	175	25.4694	Guardia civil	SEDENTARIO	TRUE	INTENSO	FALSE						FALSE	TRUE	FALSE	FALSE	FALSE	FALSE	TRUE	FALSE	FALSE	TRUE	FALSE	FALSE	0	1115.12	26.152	96.8882	49.9658	0.797518	-2.91258	318	48.6738	1.55484	-2.81296	105	48.2696	1.62409	-1.96084	1001	47.9125
PV090_Serie2	90	2	M	42	Superior	DIESTRO	2017-06-13	78	175	25.4694	Guardia civil	SEDENTARIO	TRUE	INTENSO	FALSE						FALSE	TRUE	FALSE	FALSE	FALSE	FALSE	TRUE	FALSE	FALSE	TRUE	FALSE	FALSE	0	1086.03	26.8289	91.8815	50.5438	0.82483	-2.64702	81	50.5061	0.0239922	-3.14726	908	50.2368	0.421259	-2.39102	1093	50.0565
PV091_Serie1	91	1	F	69	Medio	DIESTRO	2017-06-14	70	160	27.3437	Envasadora	MUY PESADO	FALSE		FALSE				AGUDO (<3meses desde aparición)	FRECUENTE	FALSE	TRUE	FALSE	FALSE	FALSE	FALSE	TRUE	FALSE	FALSE	FALSE	FALSE	FALSE	0	1203.84	43.1792	111.974	48.4493	-1.44217	6.26993	333	48.1456	-2.83552	6.36403	209	47.9199	-1.64118	4.44942	459	47.5601
PV091_Serie2	91	2	F	69	Medio	DIESTRO	2017-06-14	70	160	27.3437	Envasadora	MUY PESADO	FALSE		FALSE				AGUDO (<3meses desde aparición)	FRECUENTE	FALSE	TRUE	FALSE	FALSE	FALSE	FALSE	TRUE	FALSE	FALSE	FALSE	FALSE	FALSE	0	1281.52	48.3959	108.328	49.5598	-9.34605	1.93438	282	49.4254	-3.78486	1.746	65	49.3724	-10.789	-1.47996	616	49.3313
PV092_Serie1	92	1	F	21	Superior	DIESTRO	2017-06-14	60	162	22.8624	Estudiante	SEDENTARIO	TRUE	INTENSO	FALSE				CRONICO (>6 meses desde aparición)	FRECUENTE	FALSE	TRUE	FALSE	FALSE	FALSE	FALSE	FALSE	FALSE	FALSE	FALSE	FALSE	TRUE	35	1554.18	51.1918	132.766	59.9718	-3.38577	-5.17927	348	59.7475	-2.58324	-3.88757	68	59.5574	-2.05398	-4.75355	217	58.8002
PV092_Serie2	92	2	F	21	Superior	DIESTRO	2017-06-14	60	162	22.8624	Estudiante	SEDENTARIO	TRUE	INTENSO	FALSE				CRONICO (>6 meses desde aparición)	FRECUENTE	FALSE	TRUE	FALSE	FALSE	FALSE	FALSE	FALSE	FALSE	FALSE	FALSE	FALSE	TRUE	35	1544.28	55.9522	130.494	60.3682	-5.84963	-5.69682	632	60.2077	-3.42039	-3.96229	55	60.1783	-5.52821	-5.62031	290	60.1
PV093_Serie1	93	1	F	50	Medio	DIESTRO	2017-06-14	61	160	23.8281	Ama de casa	MODERADO	FALSE		FALSE				CRONICO (>6 meses desde aparición)	FRECUENTE	TRUE	TRUE	FALSE	FALSE	FALSE	FALSE	FALSE	FALSE	FALSE	FALSE	FALSE	TRUE	41	1341.33	35.5602	114.838	59.1465	-2.12252	-5.60611	612	58.6065	-1.25709	-5.50858	294	58.5431	-3.12983	-4.81092	768	58.1523
PV093_Serie2	93	2	F	50	Medio	DIESTRO	2017-06-14	61	160	23.8281	Ama de casa	MODERADO	FALSE		FALSE				CRONICO (>6 meses desde aparición)	FRECUENTE	TRUE	TRUE	FALSE	FALSE	FALSE	FALSE	FALSE	FALSE	FALSE	FALSE	FALSE	TRUE	41	1339.52	44.1212	114.141	61.6559	-3.22247	-5.44885	465	60.5497	-2.34352	-5.86039	209	60.543	-1.99275	-5.97061	714	60.4828
PV094_Serie1	94	1	M	44	Superior	DIESTRO	2017-06-15	68	169	23.8087	Militar	MUY PESADO	TRUE	INTENSO	FALSE						FALSE	TRUE	FALSE	FALSE	FALSE	FALSE	FALSE	FALSE	FALSE	FALSE	FALSE	FALSE	0	1440.43	46.0495	124.038	63.1569	0.0577982	0.0845703	213	62.8797	-0.704694	0.376425	470	62.7341	1.40385	0.18479	80	62.4234
PV094_Serie2	94	2	M	44	Superior	DIESTRO	2017-06-15	68	169	23.8087	Militar	MUY PESADO	TRUE	INTENSO	FALSE						FALSE	TRUE	FALSE	FALSE	FALSE	FALSE	FALSE	FALSE	FALSE	FALSE	FALSE	FALSE	0	1415.8	54.9611	124.895	63.5641	4.28743	-0.196743	698	61.4374	3.53542	-0.900178	488	61.0335	5.4518	-0.577824	591	60.6647
PV095_Serie1	95	1	M	42	Medio	DIESTRO	2017-06-15	78	167	27.968	Operario de lavado	MODERADO	FALSE		FALSE				AGUDO (<3meses desde aparición)	FRECUENTE	TRUE	TRUE	FALSE	FALSE	FALSE	FALSE	FALSE	FALSE	FALSE	FALSE	FALSE	TRUE	40	1203.37	67.9103	115.641	54.0708	-7.31137	-1.81808	149	51.3425	-4.83015	-1.3495	462	51.1332	-9.00213	-1.66898	232	49.1157
PV095_Serie2	95	2	M	42	Medio	DIESTRO	2017-06-15	78	167	27.968	Operario de lavado	MODERADO	FALSE		FALSE				AGUDO (<3meses desde aparición)	FRECUENTE	TRUE	TRUE	FALSE	FALSE	FALSE	FALSE	FALSE	FALSE	FALSE	FALSE	FALSE	TRUE	40	1155.58	84.7197	101.096	49.3844	-2.20282	1.03391	255	48.8848	-1.0477	-0.641419	82	48.4672	-0.387685	0.872344	367	48.3451
PV096_Serie1	96	1	F	29	Medio	DIESTRO	2017-06-16	80	176	25.8264	Comercial	DE PIE	FALSE		TRUE	2017-02-22	C	C	SUBAGUDO (3-6 meses desde aparición)	DISCONTINUO	FALSE	TRUE	FALSE	FALSE	FALSE	FALSE	FALSE	FALSE	FALSE	FALSE	FALSE	TRUE	9	1330.09	33.8963	114.819	62.0231	-0.0389607	3.62338	230	60.8182	-2.05128	0.558701	558	60.2875	-1.55779	1.95467	734	59.8469
PV096_Serie2	96	2	F	29	Medio	DIESTRO	2017-06-16	80	176	25.8264	Comercial	DE PIE	FALSE		TRUE	2017-02-22	C	C	SUBAGUDO (3-6 meses desde aparición)	DISCONTINUO	FALSE	TRUE	FALSE	FALSE	FALSE	FALSE	FALSE	FALSE	FALSE	FALSE	FALSE	TRUE	9	1320.23	42.809	113.791	62.8691	-0.226293	0.87182	445	61.0255	-1.47192	1.44823	177	60.2813	-1.24072	-1.97392	576	60.187
PV097_Serie1	97	1	F	51	Superior	DIESTRO	2017-06-16	47	153	20.0777	Dependienta	DE PIE	TRUE	MODERADO	FALSE						FALSE	FALSE	FALSE	FALSE	FALSE	FALSE	FALSE	FALSE	FALSE	FALSE	FALSE	FALSE	0	1375.72	37.2623	118.658	46.8187	-3.98528	0.870372	458	45.8507	-3.66063	-1.147	88	45.6306	-4.09568	-0.276853	280	44.6541
PV097_Serie2	97	2	F	51	Superior	DIESTRO	2017-06-16	47	153	20.0777	Dependienta	DE PIE	TRUE	MODERADO	FALSE						FALSE	FALSE	FALSE	FALSE	FALSE	FALSE	FALSE	FALSE	FALSE	FALSE	FALSE	FALSE	0	1156.44	47.2403	109.592	47.2598	-3.10767	2.63734	71	46.6215	-5.63417	1.79069	189	44.9541	-7.1836	-1.07608	630	44.5056
PV098_Serie1	98	1	M	36	Medio	DIESTRO	2017-06-16	75	178	23.6713	Comercial	SEDENTARIO	FALSE		FALSE						FALSE	TRUE	FALSE	FALSE	FALSE	FALSE	FALSE	FALSE	FALSE	FALSE	FALSE	FALSE	0	1620.35	55.9513	140.654	79.1993	-0.0501904	-1.33052	187	79.0637	2.14559	-2.91132	60	78.7684	-1.48926	-2.30837	312	78.0898
PV098_Serie2	98	2	M	36	Medio	DIESTRO	2017-06-16	75	178	23.6713	Comercial	SEDENTARIO	FALSE		FALSE						FALSE	TRUE	FALSE	FALSE	FALSE	FALSE	FALSE	FALSE	FALSE	FALSE	FALSE	FALSE	0	1509.22	70.922	135.3	75.0042	1.91057	-1.87734	59	70.8866	-0.759684	-4.29767	591	69.0753	-4.24984	-4.48673	150	68.9729
PV099_Serie1	99	1	M	60	Superior	DIESTRO	2017-06-16	94	180	29.0123	Médico	SEDENTARIO	TRUE	LEVE	TRUE	2016-07-16	E	C			FALSE	FALSE	FALSE	FALSE	TRUE	FALSE	TRUE	FALSE	FALSE	FALSE	FALSE	FALSE		1161.92	95.5526	111.778	59.2648	10.2022	-8.47653	163	57.3764	13.0028	-10.9486	331	56.3301	9.7724	-8.82598	222	55.9015
PV099_Serie2	99	2	M	60	Superior	DIESTRO	2017-06-16	94	180	29.0123	Médico	SEDENTARIO	TRUE	LEVE	TRUE	2016-07-16	E	C			FALSE	FALSE	FALSE	FALSE	TRUE	FALSE	TRUE	FALSE	FALSE	FALSE	FALSE	FALSE		1185.44	109.358	111.812	56.291	11.3871	-7.0577	238	55.7027	9.43255	-9.39193	89	55.547	10.2048	-9.64537	139	54.2547
PV100_Serie1	100	1	F	54	Medio	DIESTRO	2017-06-19	59	162	22.4813	Locutora radiotaxi	SEDENTARIO	TRUE	LEVE	TRUE	2011-11-01	LATERAL DERECHO	C	CRONICO (>6 meses desde aparición)	FRECUENTE	TRUE	TRUE	FALSE	FALSE	FALSE	FALSE	FALSE	FALSE	FALSE	FALSE	FALSE	TRUE	44	1309.1	42.5585	114.915	51.694	-8.48263	-8.24254	458	50.5075	-9.26296	-7.76692	584	49.3799	-5.39206	-5.97435	713	49.0408
PV100_Serie2	100	2	F	54	Medio	DIESTRO	2017-06-19	59	162	22.4813	Locutora radiotaxi	SEDENTARIO	TRUE	LEVE	TRUE	2011-11-01	LATERAL DERECHO	C	CRONICO (>6 meses desde aparición)	FRECUENTE	TRUE	TRUE	FALSE	FALSE	FALSE	FALSE	FALSE	FALSE	FALSE	FALSE	FALSE	TRUE	44	1354.95	36.3843	116.408	54.0567	-7.40185	-5.63066	732	53.6945	-5.86034	-5.62633	428	53.6843	-5.57253	-6.39927	264	53.237
PV101_Serie1	101	1	F	38	Básico	DIESTRO	2017-06-19	80	165	29.3848	Locutora radiotaxi	SEDENTARIO	FALSE		FALSE				CRONICO (>6 meses desde aparición)	FRECUENTE	TRUE	TRUE	FALSE	TRUE	FALSE	FALSE	FALSE	TRUE	FALSE	FALSE	TRUE	FALSE	73	821.15	42.8575	83.9007	39.4355	-1.99517	-0.664183	72	37.8493	-1.89276	-1.99189	192	35.1524	-1.41564	-1.18976	281	33.1815
PV101_Serie2	101	2	F	38	Básico	DIESTRO	2017-06-19	80	165	29.3848	Locutora radiotaxi	SEDENTARIO	FALSE		FALSE				CRONICO (>6 meses desde aparición)	FRECUENTE	TRUE	TRUE	FALSE	TRUE	FALSE	FALSE	FALSE	TRUE	FALSE	FALSE	TRUE	FALSE	73	782.069	63.6864	74.764	33.5849	-1.86812	-1.86106	208	33.3192	-0.564891	0.0870503	263	31.3596	-0.669395	-0.915808	320	30.9516
PV102_Serie1	102	1	M	39	Superior	DIESTRO	2017-06-19	68	176	21.9525	Procurador	SEDENTARIO	FALSE		FALSE						FALSE	FALSE	FALSE	FALSE	FALSE	FALSE	FALSE	FALSE	FALSE	FALSE	FALSE	TRUE	13	1607.87	48.1398	140.181	68.876	-8.34162	3.64692	87	67.1771	-1.38323	7.73126	556	65.8498	2.54056	8.89893	803	65.685
PV102_Serie2	102	2	M	39	Superior	DIESTRO	2017-06-19	68	176	21.9525	Procurador	SEDENTARIO	FALSE		FALSE						FALSE	FALSE	FALSE	FALSE	FALSE	FALSE	FALSE	FALSE	FALSE	FALSE	FALSE	TRUE	13	1554.86	51.8979	133.406	64.4876	-4.0581	2.64992	81	63.3989	-1.47093	6.56259	830	63.1299	-2.25925	7.55623	461	63.0894
PV103_Serie1	103	1	F	60	Medio	DIESTRO	2017-06-20	75	180	23.1481	Ama de casa		TRUE	LEVE	TRUE	2017-03-30	FRONTAL		SUBAGUDO (3-6 meses desde aparición)	ESPORADICO	TRUE	TRUE	FALSE	FALSE	FALSE	FALSE	FALSE	FALSE	FALSE	FALSE	FALSE	FALSE	26	1265.48	23.0423	101.818	65.771	-4.99912	-4.42272	757	65.3495	-4.03703	-2.80196	1204	65.1903	-2.7711	-5.01711	334	65.1596
PV103_Serie2	103	2	F	60	Medio	DIESTRO	2017-06-20	75	180	23.1481	Ama de casa		TRUE	LEVE	TRUE	2017-03-30	FRONTAL		SUBAGUDO (3-6 meses desde aparición)	ESPORADICO	TRUE	TRUE	FALSE	FALSE	FALSE	FALSE	FALSE	FALSE	FALSE	FALSE	FALSE	FALSE	26	1183.49	22.9181	104.634	68.559	-2.4709	-4.03625	131	66.3634	-3.35465	-4.85628	408	66.0481	-1.96406	-4.53871	817	65.3314
PV104_Serie1	104	1	M	62	Medio	AMBIDIESTRO	2017-06-20	98	174	32.3689	Conductor de autobus	SEDENTARIO	TRUE	MODERADO	FALSE						FALSE	FALSE	FALSE	FALSE	FALSE	FALSE	FALSE	FALSE	FALSE	FALSE	FALSE	FALSE	0	1162.09	44.1523	100.896	56.3158	0.282059	-3.58586	559	56.2585	4.46649	-1.09051	201	56.2181	1.21624	-0.876985	322	55.8545
PV104_Serie2	104	2	M	62	Medio	AMBIDIESTRO	2017-06-20	98	174	32.3689	Conductor de autobus	SEDENTARIO	TRUE	MODERADO	FALSE						FALSE	FALSE	FALSE	FALSE	FALSE	FALSE	FALSE	FALSE	FALSE	FALSE	FALSE	FALSE	0	1149.96	51.4295	101.524	56.2834	0.926092	-3.27864	154	53.5393	-0.671408	-0.715624	352	52.5848	1.97239	0.319487	253	51.8385
PV105_Serie1	105	1	M	25	Superior	DIESTRO	2017-06-20	78	183	23.2912	Estudiante	SEDENTARIO	TRUE	INTENSO	FALSE					ESPORADICO	FALSE	TRUE	FALSE	FALSE	FALSE	FALSE	FALSE	FALSE	FALSE	FALSE	FALSE	FALSE	3	1413.79	52.3626	122.336	71.6473	-2.3315	-4.58011	444	69.5789	1.0068	-3.88115	218	68.9842	-4.25862	-3.99605	762	68.4209
PV105_Serie2	105	2	M	25	Superior	DIESTRO	2017-06-20	78	183	23.2912	Estudiante	SEDENTARIO	TRUE	INTENSO	FALSE					ESPORADICO	FALSE	TRUE	FALSE	FALSE	FALSE	FALSE	FALSE	FALSE	FALSE	FALSE	FALSE	FALSE	3	1255.05	62.0082	116.735	71.1777	-1.49139	-4.44087	188	70.8234	0.177388	-2.00688	545	70.2666	1.14831	-1.74809	282	69.9063
PV106_Serie1	106	1	M	59	Superior	DIESTRO	2017-06-20	100	175	32.6531	Médico	SEDENTARIO	TRUE	MODERADO	FALSE				AGUDO (<3meses desde aparición)	ESPORADICO	FALSE	TRUE	FALSE	FALSE	FALSE	FALSE	TRUE	FALSE	FALSE	FALSE	TRUE	FALSE	2	1064.94	32.3493	91.5531	55.2937	-3.4006	1.91756	784	55.179	-3.24502	2.27237	367	54.9749	-4.01047	2.21504	656	54.6028
PV106_Serie2	106	2	M	59	Superior	DIESTRO	2017-06-20	100	175	32.6531	Médico	SEDENTARIO	TRUE	MODERADO	FALSE				AGUDO (<3meses desde aparición)	ESPORADICO	FALSE	TRUE	FALSE	FALSE	FALSE	FALSE	TRUE	FALSE	FALSE	FALSE	TRUE	FALSE	2	1133.21	36.6972	96.4995	54.9986	-3.58162	-0.0593019	226	54.819	-4.62958	-1.20863	501	54.5903	-2.31036	1.27109	373	54.3167
PV107_Serie1	107	1	F	43	Superior	DIESTRO	2017-06-20	52	155	21.6441	Médico Médico	SEDENTARIO	TRUE	LEVE	TRUE	2017-04-01	LATERAL IZQUIERDO		AGUDO (<3meses desde aparición)	ESPORADICO	FALSE	TRUE	FALSE	FALSE	FALSE	FALSE	FALSE	FALSE	FALSE	FALSE	TRUE	FALSE	5	1196.45	19.7825	104.123	52.851	2.30848	-4.6108	1611	52.8062	0.997987	-2.32346	99	51.0391	5.65054	-0.804185	1359	48.8109
PV107_Serie2	107	2	F	43	Superior	DIESTRO	2017-06-20	52	155	21.6441	Médico Médico	SEDENTARIO	TRUE	LEVE	TRUE	2017-04-01	LATERAL IZQUIERDO		AGUDO (<3meses desde aparición)	ESPORADICO	FALSE	TRUE	FALSE	FALSE	FALSE	FALSE	FALSE	FALSE	FALSE	FALSE	TRUE	FALSE	5	1219.46	25.4903	104.203	54.1968	2.23927	-4.03445	679	53.4487	0.35296	-5.02403	1064	53.3742	2.57044	-3.712	1281	52.9414
PV108_Serie1	108	1	M	48	Medio	DIESTRO	2017-06-20	80	175	26.1224	Vendedor	SEDENTARIO	FALSE		FALSE						FALSE	TRUE	FALSE	FALSE	FALSE	FALSE	FALSE	FALSE	FALSE	FALSE	FALSE	FALSE	0	1300.91	38.0829	104.761	61.3046	-3.49017	2.96257	344	60.8631	-4.74551	3.00443	203	60.8269	-2.72429	2.72467	481	60.7452
PV108_Serie2	108	2	M	48	Medio	DIESTRO	2017-06-20	80	175	26.1224	Vendedor	SEDENTARIO	FALSE		FALSE						FALSE	TRUE	FALSE	FALSE	FALSE	FALSE	FALSE	FALSE	FALSE	FALSE	FALSE	FALSE	0	1213.13	38.7829	103.018	61.6887	-6.29802	2.26673	445	61.342	-8.82027	1.52556	180	61.1569	-7.7251	2.63488	836	60.967
PV109_Serie1	109	1	F	19	Superior	DIESTRO	2017-06-21	73	172	24.6755	Programador	SEDENTARIO	FALSE		FALSE						FALSE	FALSE	FALSE	FALSE	FALSE	FALSE	FALSE	FALSE	FALSE	FALSE	FALSE	FALSE	0	1248.25	87.6582	115.927	60.1876	0.69276	2.38083	240	59.5754	2.41895	3.24089	371	58.321	-3.98501	1.90427	51	58.2836
PV109_Serie2	109	2	F	119	Superior	DIESTRO	2017-06-21	73	172	24.6755	Programador	SEDENTARIO	FALSE		FALSE						FALSE	FALSE	FALSE	FALSE	FALSE	FALSE	FALSE	FALSE	FALSE	FALSE	FALSE	FALSE	0	1261.42	100.752	119.413	64.123	3.18407	2.65154	161	63.0206	2.36144	2.57042	220	60.7533	4.65772	3.94075	327	60.6583
PV110_Serie1	110	1	F	58	Medio	DIESTRO	2017-06-21	69	160	26.9531	Agente comercial	SEDENTARIO	TRUE	LEVE	TRUE	1991-06-15			CRONICO (>6 meses desde aparición)	FRECUENTE	TRUE	TRUE	FALSE	FALSE	TRUE	FALSE	TRUE	FALSE	FALSE	FALSE	FALSE	FALSE	70	830.524	11.145	78.4232	45.0996	-3.91172	-0.660697	105	41.3996	-2.53739	-0.470181	685	40.3245	-2.51533	-0.0807096	973	39.7022
PV110_Serie2	110	2	F	58	Medio	DIESTRO	2017-06-21	69	160	26.9531	Agente comercial	SEDENTARIO	TRUE	LEVE	TRUE	1991-06-15			CRONICO (>6 meses desde aparición)	FRECUENTE	TRUE	TRUE	FALSE	FALSE	TRUE	FALSE	TRUE	FALSE	FALSE	FALSE	FALSE	FALSE	70	733.033	12.492	70.0469	39.3086	-0.757437	0.965109	1555	34.9865	-2.30425	0.461631	328	34.8518	-2.8438	-0.742024	88	33.489
PV111_Serie1	111	1	M	24	Superior	ZURDO	2017-06-21	69	175	22.5306	Estudiante	SEDENTARIO	TRUE	MODERADO	FALSE						FALSE	FALSE	FALSE	FALSE	FALSE	FALSE	FALSE	FALSE	FALSE	FALSE	FALSE	FALSE	0	1353.34	78.6825	132.335	59.0445	7.22803	3.90496	356	58.5447	7.62833	0.420154	206	56.1783	4.31465	2.24933	281	55.4139
PV111_Serie2	111	2	M	24	Superior	ZURDO	2017-06-21	69	175	22.5306	Estudiante	SEDENTARIO	TRUE	MODERADO	FALSE						FALSE	FALSE	FALSE	FALSE	FALSE	FALSE	FALSE	FALSE	FALSE	FALSE	FALSE	FALSE	0	1390.89	88.2541	131.192	56.71	3.5462	1.50507	345	55.7065	4.63303	2.43303	127	55.3772	3.58946	2.69983	50	55.1258
PV112_Serie1	112	1	M	38	Medio	DIESTRO	2017-06-22	75	172	25.3515	Director de empresa	SEDENTARIO	FALSE		FALSE				CRONICO (>6 meses desde aparición)	DISCONTINUO	FALSE	TRUE	FALSE	FALSE	FALSE	FALSE	FALSE	FALSE	FALSE	FALSE	FALSE	TRUE	27	1137.14	50.856	97.2208	55.4501	7.27219	-5.12034	613	55.2934	3.44395	-6.57703	146	54.9107	5.11042	-6.24535	527	54.8209
PV112_Serie2	112	2	M	38	Medio	DIESTRO	2017-06-22	75	172	25.3515	Director de empresa	SEDENTARIO	FALSE		FALSE				CRONICO (>6 meses desde aparición)	DISCONTINUO	FALSE	TRUE	FALSE	FALSE	FALSE	FALSE	FALSE	FALSE	FALSE	FALSE	FALSE	TRUE	27	1150.56	60.1757	98.0317	59.9184	1.9064	-8.88568	531	59.5725	1.78855	-6.84569	368	59.3819	2.34293	-8.01711	289	59.357
PV113_Serie1	113	1	M	47	Básico	DIESTRO	2017-06-23	79	184	23.3341	Guardia Civil	MODERADO	TRUE	MODERADO	TRUE	2017-05-12	C	B	AGUDO (<3meses desde aparición)	FRECUENTE	TRUE	TRUE	FALSE	FALSE	FALSE	FALSE	FALSE	FALSE	FALSE	FALSE	TRUE	FALSE	36	1407.83	58.7576	131.574	59.7852	-0.403521	0.946225	178	59.7611	-0.588323	-2.05467	63	59.4056	1.30816	0.747019	604	59.3064
PV113_Serie2	113	2	M	47	Básico	DIESTRO	2017-06-23	79	184	23.3341	Guardia Civil	MODERADO	TRUE	MODERADO	TRUE	2017-05-12	C	B	AGUDO (<3meses desde aparición)	FRECUENTE	TRUE	TRUE	FALSE	FALSE	FALSE	FALSE	FALSE	FALSE	FALSE	FALSE	TRUE	FALSE	36	1410.98	76.6837	131.181	61.318	-4.22653	-2.25902	55	60.963	-2.85059	-1.48505	132	60.4475	-3.01266	-0.572618	385	60.2428
PV114_Serie1	114	1	M	32	Superior	DIESTRO	2017-06-23	72	171	24.623	Comercial	DE PIE	FALSE		TRUE	2017-05-31	E	E	AGUDO (<3meses desde aparición)	FRECUENTE	FALSE	TRUE	FALSE	FALSE	TRUE	FALSE	FALSE	TRUE	TRUE	TRUE	TRUE	TRUE	77	807.461	40.6986	76.8128	44.3382	-1.64322	-2.37901	251	43.8806	-1.17022	-2.82487	155	43.3626	1.15558	-1.06444	345	43.2728
PV114_Serie2	114	2	M	32	Superior	DIESTRO	2017-06-23	72	171	24.623	Comercial	DE PIE	FALSE		TRUE	2017-05-31	E	E	AGUDO (<3meses desde aparición)	FRECUENTE	FALSE	TRUE	FALSE	FALSE	TRUE	FALSE	FALSE	TRUE	TRUE	TRUE	TRUE	TRUE	77	832.751	52.0469	80.2277	47.37	2.81967	0.257404	408	45.9681	4.97081	1.77441	191	43.6459	3.95982	1.05266	123	42.6818
PV115_Serie1	115	1	M	26	Superior	DIESTRO	2017-06-23	67	180	20.679	Estudiante	SEDENTARIO	TRUE	MODERADO	FALSE						FALSE	FALSE	FALSE	FALSE	FALSE	FALSE	FALSE	FALSE	FALSE	FALSE	FALSE	FALSE	6	1228.14	67.3323	115.291	57.0122	2.79756	-0.260358	65	56.8483	0.761044	-2.3694	243	55.795	1.85643	-1.33988	403	55.6267
PV115_Serie2	115	2	M	26	Superior	DIESTRO	2017-06-23	67	180	20.679	Estudiante	SEDENTARIO	TRUE	MODERADO	FALSE						FALSE	FALSE	FALSE	FALSE	FALSE	FALSE	FALSE	FALSE	FALSE	FALSE	FALSE	FALSE	6	1254.85	72.6185	111.685	58.9181	1.69538	-1.02739	270	58.8233	3.89924	-0.564996	345	58.1634	3.26797	1.1211	128	57.4343
PV116_Serie1	116	1	M	50	Superior	DIESTRO	2017-06-27	96	182	28.982	Ingeniero	SEDENTARIO	TRUE	LEVE	FALSE						FALSE	FALSE	FALSE	FALSE	FALSE	FALSE	FALSE	FALSE	FALSE	FALSE	FALSE	FALSE	0	1125.26	59.8544	106.812	56.4935	-0.271647	-2.88263	346	56.3666	-0.150344	-3.4168	270	55.9683	-1.68972	-2.73222	170	55.0259
PV116_Serie2	116	2	M	50	Superior	DIESTRO	2017-06-27	96	182	28.982	Ingeniero	SEDENTARIO	TRUE	LEVE	FALSE						FALSE	FALSE	FALSE	FALSE	FALSE	FALSE	FALSE	FALSE	FALSE	FALSE	FALSE	FALSE	0	1101.18	84.7063	107.176	61.7445	-0.0130994	-3.25076	241	61.693	1.48979	-1.85444	179	61.6055	1.04911	-3.73866	118	60.6315
PV117_Serie1	117	1	F	18	Superior	DIESTRO	2017-06-27	76	171	25.9909	Estudiante	SEDENTARIO	FALSE		FALSE						FALSE	FALSE	FALSE	FALSE	FALSE	FALSE	FALSE	FALSE	FALSE	FALSE	FALSE	FALSE	2	1476.78	68.4965	128.589	69.2335	4.57742	-3.1371	424	67.8659	-2.99299	-6.32449	515	67.3581	3.14731	-1.17361	341	66.5649
PV117_Serie2	117	2	F	18	Superior	DIESTRO	2017-06-27	76	171	25.9909	Estudiante	SEDENTARIO	FALSE		FALSE						FALSE	FALSE	FALSE	FALSE	FALSE	FALSE	FALSE	FALSE	FALSE	FALSE	FALSE	FALSE	2	1355.67	79.9332	126.258	64.6242	-0.0535705	-2.23683	65	64.3445	-2.97711	-3.9484	147	63.1166	4.02015	0.365577	457	62.6474
PV118_Serie1	118	1	F	28	Medio	DIESTRO	2017-06-27	64	176	20.6612	Maquilladora	SEDENTARIO	TRUE	MODERADO	TRUE	2017-05-26	E	C	AGUDO (<3meses desde aparición)	FRECUENTE	FALSE	TRUE	FALSE	FALSE	FALSE	FALSE	TRUE	FALSE	FALSE	FALSE	FALSE	TRUE	41	1474.47	45.5082	130.755	66.403	0.410307	-2.91367	259	64.7909	1.60232	-4.47566	108	63.9843	-0.164856	-2.83758	393	63.7606
PV118_Serie2	118	2	F	28	Medio	DIESTRO	2017-06-27	64	176	20.6612	Maquilladora	SEDENTARIO	TRUE	MODERADO	TRUE	2017-05-26	E	C	AGUDO (<3meses desde aparición)	FRECUENTE	FALSE	TRUE	FALSE	FALSE	FALSE	FALSE	TRUE	FALSE	FALSE	FALSE	FALSE	TRUE	41	1424.85	44.2499	125.295	72.7104	-1.17154	-3.72737	217	72.1369	-2.15015	-5.2749	770	71.2891	-2.19703	-3.62614	357	71.1633
PV119_Serie1	119	1	F	25	Superior	DIESTRO	2017-06-28	65	173	21.7181	Estudiante	SEDENTARIO	TRUE	LEVE	FALSE						FALSE	FALSE	FALSE	FALSE	FALSE	FALSE	FALSE	FALSE	FALSE	FALSE	FALSE	FALSE	0	1639.62	62.3906	140.238	66.6119	-2.76062	1.36177	611	65.7527	-9.26914	-1.23505	727	65.1932	-4.48486	1.52397	295	64.7135
PV119_Serie2	119	2	F	25	Superior	DIESTRO	2017-06-28	65	173	21.7181	Estudiante	SEDENTARIO	TRUE	LEVE	FALSE						FALSE	FALSE	FALSE	FALSE	FALSE	FALSE	FALSE	FALSE	FALSE	FALSE	FALSE	FALSE	0	1568.14	65.9993	136.864	65.5012	-4.84959	-0.926988	454	63.6219	-4.44058	2.917	657	63.0275	-8.48609	0.333033	556	62.494
PV120_Serie1	120	1		24	Superior	DIESTRO	2017-06-30	67	180	20.679	Administrativo	SEDENTARIO	TRUE	MODERADO	FALSE						FALSE	FALSE	FALSE	FALSE	FALSE	FALSE	FALSE	FALSE	FALSE	FALSE	FALSE	FALSE	0	1311.12	56.7094	122.325	55.7701	-3.11895	-4.67003	161	55.0165	-4.39824	-5.94991	383	54.2294	-2.62704	-4.80452	486	54.0186
PV120_Serie2	120	2		24	Superior	DIESTRO	2017-06-30	67	180	20.679	Administrativo	SEDENTARIO	TRUE	MODERADO	FALSE						FALSE	FALSE	FALSE	FALSE	FALSE	FALSE	FALSE	FALSE	FALSE	FALSE	FALSE	FALSE	0	1182.09	58.0593	113.107	53.9724	-6.08834	-6.07901	149	52.5327	-4.8214	-5.35955	432	51.9818	-5.24534	-5.75814	521	51.3559
PV121_Serie1	121	1	M	39	Medio	DIESTRO	2017-06-30	91	187	26.023	Optico	SEDENTARIO	TRUE	MODERADO	FALSE				CRONICO (>6 meses desde aparición)	DISCONTINUO	FALSE	TRUE	FALSE	FALSE	FALSE	FALSE	FALSE	FALSE	FALSE	FALSE	FALSE	FALSE	0	1129.53	32.7591	105.23	46.6237	-1.16448	-2.39205	854	46.1515	-3.10287	-5.10471	226	46.0412	-2.15255	-4.22394	70	45.9201
PV121_Serie2	121	2	M	39	Medio	DIESTRO	2017-06-30	91	187	26.023	Optico	SEDENTARIO	TRUE	MODERADO	FALSE				CRONICO (>6 meses desde aparición)	DISCONTINUO	FALSE	TRUE	FALSE	FALSE	FALSE	FALSE	FALSE	FALSE	FALSE	FALSE	FALSE	FALSE	0	1212.49	26.825	103.447	51.036	-3.36869	-1.4844	634	50.9012	-4.92466	-1.91838	821	50.7975	-3.38634	-2.49252	457	50.783
PV122_Serie1	122	1	M	46	Superior	DIESTRO	2017-06-30	81	178	25.565	Psicologo	SEDENTARIO	FALSE		FALSE				CRONICO (>6 meses desde aparición)	FRECUENTE	FALSE	TRUE	FALSE	TRUE	TRUE	FALSE	FALSE	FALSE	FALSE	FALSE	FALSE	FALSE	0	1221.72	26.3756	104.024	45.3287	0.149927	-0.311171	82	44.5671	-2.21371	-0.682328	274	43.9723	-5.00792	-0.161846	869	43.7904
PV122_Serie2	122	2	M	46	Superior	DIESTRO	2017-06-30	81	178	25.565	Psicologo	SEDENTARIO	FALSE		FALSE				CRONICO (>6 meses desde aparición)	FRECUENTE	FALSE	TRUE	FALSE	TRUE	TRUE	FALSE	FALSE	FALSE	FALSE	FALSE	FALSE	FALSE	0	1158.88	22.2178	98.7559	49.318	-1.92294	-2.13843	84	49.1269	-1.68787	-0.946218	489	48.5745	-1.33627	-2.21166	277	47.8706
PV123_Serie1	123	1	M	47	Medio	DIESTRO	2017-06-30	72	180	22.2222	Pizzero	MODERADO	TRUE	MODERADO	FALSE				AGUDO (<3meses desde aparición)	FRECUENTE	TRUE	TRUE	FALSE	FALSE	TRUE	FALSE	TRUE	FALSE	FALSE	TRUE	FALSE	TRUE	0	896.694	36.0408	84.4991	46.2444	0.771017	-0.85837	601	44.3016	0.393483	-2.57435	698	43.8925	1.36065	-1.29827	500	40.4556
PV123_Serie2	123	2	M	47	Medio	DIESTRO	2017-06-30	72	180	22.2222	Pizzero	MODERADO	TRUE	MODERADO	FALSE				AGUDO (<3meses desde aparición)	FRECUENTE	TRUE	TRUE	FALSE	FALSE	TRUE	FALSE	TRUE	FALSE	FALSE	TRUE	FALSE	TRUE	0	679.246	36.5186	74.2098	42.3597	-0.46729	-0.355795	57	36.6642	3.73239	0.897094	237	34.5876	3.04679	-0.12885	146	33.7112
PV124_Serie1	124	1	M	54	Medio	DIESTRO	2017-06-30	87	179	27.1527	Taxista	SEDENTARIO	FALSE		TRUE	2017-05-26	E	D			FALSE	TRUE	FALSE	FALSE	FALSE	FALSE	FALSE	FALSE	FALSE	FALSE	FALSE	FALSE	0	1194.92	43.0448	101.759	46.3265	-0.405878	-1.5448	182	46	4.89996	-0.756964	640	45.9806	-0.984825	-2.076	73	45.6776
PV124_Serie2	124	2	M	54	Medio	DIESTRO	2017-06-30	87	179	27.1527	Taxista	SEDENTARIO	FALSE		TRUE	2017-05-26	E	D			FALSE	TRUE	FALSE	FALSE	FALSE	FALSE	FALSE	FALSE	FALSE	FALSE	FALSE	FALSE	0	1118.8	45.8523	98.6285	48.9005	-1.2322	-1.80975	65	47.1093	-1.32363	-1.70347	478	47.0198	0.885498	-1.92075	578	45.7759
PV125_Serie1	125	1	M	55	Medio	AMBIDIESTRO	2017-07-10	100	167	35.8564	Encargado de almacen	MUY PESADO	TRUE	INTENSO	FALSE						FALSE	FALSE	FALSE	FALSE	FALSE	FALSE	FALSE	FALSE	FALSE	FALSE	FALSE	FALSE	0	1014.37	53.727	86.7164	50.0468	9.72045	0.609047	48	49.4237	10.1461	1.09192	121	49.011	7.29211	-1.2557	360	48.0676
PV125_Serie2	125	2	M	55	Medio	AMBIDIESTRO	2017-07-10	100	167	35.8564	Encargado de almacen	MUY PESADO	TRUE	INTENSO	FALSE						FALSE	FALSE	FALSE	FALSE	FALSE	FALSE	FALSE	FALSE	FALSE	FALSE	FALSE	FALSE	0	1012.46	55.6295	85.959	47.7334	7.94968	-0.219136	500	47.7041	8.19356	-1.42193	45	46.9408	6.22923	-1.38318	119	46.1229
PV126_Serie1	126	1	M	28	Superior	DIESTRO	2017-07-10	71	173	23.7228	Ingeniero de producción	DE PIE	TRUE	LEVE	TRUE	2017-02-02	D	C			FALSE	FALSE	FALSE	FALSE	FALSE	FALSE	FALSE	FALSE	FALSE	FALSE	FALSE	FALSE	0	1221.73	35.1071	107.026	58.3785	-2.2792	1.38424	932	58.0934	-1.60213	1.65537	211	57.5452	-1.96046	2.31723	353	57.5148
PV126_Serie2	126	2	M	28	Superior	DIESTRO	2017-07-10	71	173	23.7228	Ingeniero de producción	DE PIE	TRUE	LEVE	TRUE	2017-02-02	D	C			FALSE	FALSE	FALSE	FALSE	FALSE	FALSE	FALSE	FALSE	FALSE	FALSE	FALSE	FALSE	0	1301.2	30.8927	115.706	64.3277	1.61874	1.4325	434	63.1999	-0.608753	1.00236	250	60.7403	1.82079	1.65365	1134	56.1881
PV127_Serie1	127	1	F	64	Básico	DIESTRO	2017-07-11	89	155	37.0447	Ama de casa	MODERADO	FALSE		TRUE	1992-07-11	FRONTAL	C	CRONICO (>6 meses desde aparición)	FRECUENTE	TRUE	TRUE	FALSE	TRUE	TRUE	FALSE	FALSE	FALSE	FALSE	FALSE	FALSE	FALSE	26	1057.29	39.6881	99.0909	62.9381	-3.45153	-1.31357	730	56.6781	-4.41717	-3.72063	610	56.4558	-4.757	-4.67867	245	52.3888
PV127_Serie2	127	2	F	64	Básico	DIESTRO	2017-07-11	89	155	37.0447	Ama de casa	MODERADO	FALSE		TRUE	1992-07-11	FRONTAL	C	CRONICO (>6 meses desde aparición)	FRECUENTE	TRUE	TRUE	FALSE	TRUE	TRUE	FALSE	FALSE	FALSE	FALSE	FALSE	FALSE	FALSE	26	1000.65	63.6545	97.2797	66.5376	-5.74631	-1.8152	194	64.5718	-4.76024	-2.01152	339	63.7048	-5.09073	-0.571526	269	63.154
PV128_Serie1	128	1	M	25	Superior	DIESTRO	2017-07-11	77	190	21.3296	Estudiante y entrenador	DE PIE	TRUE	INTENSO	FALSE						FALSE	FALSE	FALSE	FALSE	FALSE	FALSE	FALSE	FALSE	FALSE	FALSE	FALSE	FALSE	0	1423.43	79.0792	123.121	66.2861	-9.1164	-7.48806	282	65.223	-8.88733	-5.91177	507	64.3919	-11.4533	-8.26439	436	64.2244
PV128_Serie2	128	2	M	25	Superior	DIESTRO	2017-07-11	77	190	21.3296	Estudiante y entrenador	DE PIE	TRUE	INTENSO	FALSE						FALSE	FALSE	FALSE	FALSE	FALSE	FALSE	FALSE	FALSE	FALSE	FALSE	FALSE	FALSE	0	1341.82	86.2352	127.893	65.8533	-9.23015	-4.41092	118	63.294	-10.0509	-5.3401	190	62.6344	-14.4934	-5.56459	327	61.8373
PV129_Serie1	129	1	M	44	Superior	DIESTRO	2017-07-14	80	164	29.7442	Agente de banca	SEDENTARIO	TRUE	MODERADO	FALSE						FALSE	TRUE	FALSE	FALSE	FALSE	FALSE	FALSE	FALSE	FALSE	FALSE	FALSE	FALSE	0	924.363	15.5932	81.4216	61.7664	5.23359	-7.25393	1022	61.3575	1.38673	-6.47844	1577	60.4689	6.93361	-6.16772	291	60.0085
PV129_Serie2	129	2	M	44	Superior	DIESTRO	2017-07-14	80	164	29.7442	Agente de banca	SEDENTARIO	TRUE	MODERADO	FALSE						FALSE	TRUE	FALSE	FALSE	FALSE	FALSE	FALSE	FALSE	FALSE	FALSE	FALSE	FALSE	0	937.132	50.9311	80.9726	62.3057	3.85779	-6.34742	361	61.6327	0.383421	-4.71536	58	61.4451	7.09376	-8.70051	518	61.3097
PV130_Serie1	130	1	F	28	Básico	DIESTRO	2017-07-14	89	172	30.0838	En paro	SEDENTARIO	FALSE		TRUE	2017-05-16	E	A	AGUDO (<3meses desde aparición)	FRECUENTE	FALSE	TRUE	FALSE	FALSE	FALSE	FALSE	FALSE	FALSE	FALSE	FALSE	FALSE	FALSE	46	1085.1	55.7032	105.247	49.8615	-6.66627	0.350084	335	47.2315	-8.17742	0.336038	420	46.8196	-7.34345	0.357028	155	44.975
PV130_Serie2	130	2	F	28	Básico	DIESTRO	2017-07-14	89	172	30.0838	En paro	SEDENTARIO	FALSE		TRUE	2017-05-16	E	A	AGUDO (<3meses desde aparición)	FRECUENTE	FALSE	TRUE	FALSE	FALSE	FALSE	FALSE	FALSE	FALSE	FALSE	FALSE	FALSE	FALSE	46	923.855	54.6013	88.874	40.1177	-9.12771	-0.0139513	326	39.5275	-9.03612	-0.330757	170	36.6465	-8.78804	-0.187769	252	36.1714
PV131_Serie1	131	1	F	45	Medio	DIESTRO	2017-07-17	71	162	27.0538	Policia local	MODERADO	TRUE	INTENSO	TRUE	2013-05-15	E	C	CRONICO (>6 meses desde aparición)	ESPORADICO	FALSE	TRUE	FALSE	FALSE	FALSE	FALSE	FALSE	FALSE	FALSE	TRUE	FALSE	FALSE	13	1244.52	64.6838	107.669	61.0942	0.118955	-7.82688	464	59.5503	2.01806	-8.11848	547	58.9804	1.21436	-6.8308	383	58.9006
PV131_Serie2	131	2	F	45	Medio	DIESTRO	2017-07-17	71	162	27.0538	Policia local	MODERADO	TRUE	INTENSO	TRUE	2013-05-15	E	C	CRONICO (>6 meses desde aparición)	ESPORADICO	FALSE	TRUE	FALSE	FALSE	FALSE	FALSE	FALSE	FALSE	FALSE	TRUE	FALSE	FALSE	13	1099.83	65.7791	104.782	59.4252	1.9968	-3.67719	360	58.4439	1.56679	-4.93543	283	57.9399	0.275838	-6.20787	211	57.0703
PV132_Serie1	132	1	F	51	Medio	DIESTRO	2017-07-17	64	162	24.3865	Operario de producción	DE PIE	TRUE	INTENSO	FALSE				CRONICO (>6 meses desde aparición)	FRECUENTE	TRUE	TRUE	FALSE	FALSE	TRUE	FALSE	FALSE	TRUE	FALSE	TRUE	FALSE	TRUE	94	1152.01	36.1359	102.2	53.7907	5.8773	-6.02286	775	53.6972	3.81988	-6.85238	243	51.9115	4.56829	-3.24068	97	49.7199
PV132_Serie2	132	2	F	51	Medio	DIESTRO	2017-07-17	64	162	24.3865	Operario de producción	DE PIE	TRUE	INTENSO	FALSE				CRONICO (>6 meses desde aparición)	FRECUENTE	TRUE	TRUE	FALSE	FALSE	TRUE	FALSE	FALSE	TRUE	FALSE	TRUE	FALSE	TRUE	94	1046.71	32.5875	95.1431	54.2718	3.39056	-5.63067	269	53.2902	2.72501	-6.03823	546	52.4978	2.67197	-3.98441	119	48.1414
PV133_Serie1	133	1	F	34	Básico	DIESTRO	2017-07-17	157	50	628	Militar	MUY PESADO	TRUE	MODERADO	FALSE				AGUDO (<3meses desde aparición)	FRECUENTE	FALSE	TRUE	FALSE	FALSE	FALSE	FALSE	FALSE	TRUE	FALSE	FALSE	TRUE	TRUE	68	916.956	21.9368	112.457	70.3113	6.98579	-7.3073	106	38.6849	10.8348	-5.97448	307	38.4653	11.5974	-4.22265	483	36.3523
PV133_Serie2	133	2	F	34	Básico	DIESTRO	2017-07-17	157	50	628	Militar	MUY PESADO	TRUE	MODERADO	FALSE				AGUDO (<3meses desde aparición)	FRECUENTE	FALSE	TRUE	FALSE	FALSE	FALSE	FALSE	FALSE	TRUE	FALSE	FALSE	TRUE	TRUE	68	1304.76	22.5894	79.8347	30.6584	6.74242	-1.07771	122	25.6919	7.75334	1.17394	1142	24.1479	7.17287	1.08114	1431	23.9431
PV134_Serie1	134	1	M	51	Básico	DIESTRO	2017-07-18	134	187	38.3197	Portero discoteca	DE PIE	FALSE		TRUE	2017-06-15	E	E	AGUDO (<3meses desde aparición)	ESPORADICO	FALSE	TRUE	FALSE	FALSE	TRUE	FALSE	TRUE	FALSE	FALSE	FALSE	TRUE	FALSE	26	1186.45	33.44	101.458	56.0977	-1.30467	-2.4121	241	56.027	-2.68266	-1.97405	840	55.1361	-1.44172	-2.06831	88	54.2573
PV134_Serie2	134	2	M	51	Básico	DIESTRO	2017-07-18	134	187	38.3197	Portero discoteca	DE PIE	FALSE		TRUE	2017-06-15	E	E	AGUDO (<3meses desde aparición)	ESPORADICO	FALSE	TRUE	FALSE	FALSE	TRUE	FALSE	TRUE	FALSE	FALSE	FALSE	TRUE	FALSE	26	1169.8	45.2011	100.118	55.5105	1.97911	0.595028	707	55.4782	0.776318	-1.33677	387	54.9058	1.61061	-1.52502	598	54.5366
PV135_Serie1	135	1	F	38	Superior	DIESTRO	2017-07-18	56	168	19.8413	Fisioterapeuta	DE PIE	TRUE	MODERADO	TRUE	2017-03-15	E	D	SUBAGUDO (3-6 meses desde aparición)	DISCONTINUO	FALSE	TRUE	FALSE	FALSE	TRUE	FALSE	TRUE	FALSE	FALSE	FALSE	TRUE	FALSE	28	1197.09	38.467	102.685	60.626	1.91761	2.75365	517	60.2685	-0.8646	0.783119	767	60.1737	0.118269	3.12023	886	59.9524
PV135_Serie2	135	2	F	38	Superior	DIESTRO	2017-07-18	56	168	19.8413	Fisioterapeuta	DE PIE	TRUE	MODERADO	TRUE	2017-03-15	E	D	SUBAGUDO (3-6 meses desde aparición)	DISCONTINUO	FALSE	TRUE	FALSE	FALSE	TRUE	FALSE	TRUE	FALSE	FALSE	FALSE	TRUE	FALSE	28	1228.46	48.3647	105.007	58.7785	-3.13514	0.949593	390	58.4873	-1.79256	0.525124	174	57.479	-0.102031	0.939834	282	57.1311
PV136_Serie1	136	1	F	55	Medio	AMBIDIESTRO	2017-07-21	63	161	24.3046	Auxiliar de enfermeria	MODERADO	TRUE	MODERADO	TRUE	2012-02-17	E	C	CRONICO (>6 meses desde aparición)	FRECUENTE	TRUE	TRUE	FALSE	FALSE	FALSE	FALSE	FALSE	FALSE	FALSE	FALSE	TRUE	TRUE	96	813.345	28.5184	85.8954	45.287	-7.75431	-5.14397	153	33.0254	-5.94509	-8.22935	866	32.7086	-5.33596	-6.88329	544	32.157
PV136_Serie2	136	2	F	55	Medio	AMBIDIESTRO	2017-07-21	63	161	24.3046	Auxiliar de enfermeria	MODERADO	TRUE	MODERADO	TRUE	2012-02-17	E	C	CRONICO (>6 meses desde aparición)	FRECUENTE	TRUE	TRUE	FALSE	FALSE	FALSE	FALSE	FALSE	FALSE	FALSE	FALSE	TRUE	TRUE	96	553.753	13.9274	60.645	32.885	-2.88008	-3.08645	127	30.0208	-3.2929	-5.7698	334	26.5544	-5.17131	-7.0238	522	26.1826
PV137_Serie1	137	1	F	50	Básico	DIESTRO	2017-07-21	70	150	31.1111	Ama de casa	SEDENTARIO	FALSE		TRUE	2017-05-31	E	A	AGUDO (<3meses desde aparición)	FRECUENTE	TRUE	TRUE	FALSE	FALSE	TRUE	FALSE	FALSE	FALSE	FALSE	FALSE	FALSE	FALSE	91	558.422	18.9167	59.1231	33.8901	2.73586	1.16329	642	30.3587	3.72892	2.13868	366	29.7661	3.13677	0.287491	767	27.6849
PV137_Serie2	137	2	F	50	Básico	DIESTRO	2017-07-21	70	150	31.1111	Ama de casa	SEDENTARIO	FALSE		TRUE	2017-05-31	E	A	AGUDO (<3meses desde aparición)	FRECUENTE	TRUE	TRUE	FALSE	FALSE	TRUE	FALSE	FALSE	FALSE	FALSE	FALSE	FALSE	FALSE	91	489.199	13.9135	46.706	26.2086	0.75102	2.06945	660	25.3413	0.583446	2.0373	524	22.318	2.95519	1.99642	381	22.2752
PV138_Serie1	138	1	F	49	Superior	DIESTRO	2017-07-24	62	173	20.7157	Medico	MUY PESADO	TRUE	MODERADO	TRUE	2017-06-22	FRONTAL	C	AGUDO (<3meses desde aparición)	DISCONTINUO	FALSE	TRUE	FALSE	FALSE	TRUE	FALSE	TRUE	FALSE	FALSE	FALSE	FALSE	FALSE	31	1334.94	52.8897	118.443	59.5516	-1.1647	-1.24471	159	59.4249	1.95414	-0.957959	588	57.4252	-1.20016	-0.0578964	485	57.1684
PV138_Serie2	138	2	F	49	Superior	DIESTRO	2017-07-24	62	173	20.7157	Medico	MUY PESADO	TRUE	MODERADO	TRUE	2017-06-22	FRONTAL	C	AGUDO (<3meses desde aparición)	DISCONTINUO	FALSE	TRUE	FALSE	FALSE	TRUE	FALSE	TRUE	FALSE	FALSE	FALSE	FALSE	FALSE	31	1202.39	45.1347	114.105	62.7165	-5.21373	-1.53551	660	62.1382	0.7866	0.0127503	321	62.1203	-1.93283	-1.96478	550	61.6607
PV139_Serie1	139	1	F	53	Medio	DIESTRO	2017-07-24	45	163	16.937	Oficial administrativo	SEDENTARIO	TRUE	LEVE	TRUE	2017-02-08	LATERAL DERECHO	C	SUBAGUDO (3-6 meses desde aparición)	FRECUENTE	TRUE	TRUE	FALSE	FALSE	TRUE	FALSE	TRUE	TRUE	TRUE	FALSE	TRUE	TRUE	71	604.311	23.207	65.3373	39.2473	-3.27048	-0.609816	67	34.7679	-2.88369	-2.67157	183	29.7015	-1.89341	-1.02979	429	29.3496
PV139_Serie2	139	2	F	53	Medio	DIESTRO	2017-07-24	45	163	16.937	Oficial administrativo	SEDENTARIO	TRUE	LEVE	TRUE	2017-02-08	LATERAL DERECHO	C	SUBAGUDO (3-6 meses desde aparición)	FRECUENTE	TRUE	TRUE	FALSE	FALSE	TRUE	FALSE	TRUE	TRUE	TRUE	FALSE	TRUE	TRUE	71	761.809	28.5964	71.6154	44.7794	-6.5431	-1.51083	69	39.5167	-7.94192	-5.11038	735	39.0788	-7.20731	-4.74154	623	38.6893
PV140_Serie1	140	1	F	52	Superior	DIESTRO	2017-07-19	72	161	27.7767	Trabajadora social	SEDENTARIO	FALSE		FALSE				CRONICO (>6 meses desde aparición)	ESPORADICO	TRUE	TRUE	FALSE	FALSE	FALSE	FALSE	FALSE	FALSE	FALSE	FALSE	FALSE	FALSE	0	1135.39	59.0119	107.487	57.8193	-2.95471	-0.801169	339	57.3152	-4.77215	-1.42858	179	57.241	0.120365	-0.549031	77	55.7405
PV140_Serie2	140	2	F	52	Superior	DIESTRO	2017-07-19	72	161	27.7767	Trabajadora social	SEDENTARIO	FALSE		FALSE				CRONICO (>6 meses desde aparición)	ESPORADICO	TRUE	TRUE	FALSE	FALSE	FALSE	FALSE	FALSE	FALSE	FALSE	FALSE	FALSE	FALSE	0	1140.84	63.8052	105.991	61.8765	-6.27944	-2.26882	295	61.8762	-5.22533	-2.31443	455	61.8732	-6.42217	-4.32526	215	61.8027
PV141_Serie1	141	1					2017-07-25	0	0	#DIV/0!			FALSE		FALSE						FALSE	FALSE	FALSE	FALSE	FALSE	FALSE	FALSE	FALSE	FALSE	FALSE	FALSE	FALSE	0	1233.13	65.8723	126.407	84.2985	-4.05049	4.82685	522	77.9619	-2.01502	4.80905	444	68.8453	-2.32937	4.61383	366	66.8678
PV141_Serie2	141	2					2017-07-25	0	0	#DIV/0!			FALSE		FALSE						FALSE	FALSE	FALSE	FALSE	FALSE	FALSE	FALSE	FALSE	FALSE	FALSE	FALSE	FALSE	0	1310.76	81.1112	122.78	73.9969	3.89589	5.73057	415	69.1615	8.88766	6.08249	219	68.1553	4.88682	5.51574	345	67.9039
PV142_Serie1	142	1					2017-07-25	0	0	#DIV/0!			FALSE		FALSE						FALSE	FALSE	FALSE	FALSE	FALSE	FALSE	FALSE	FALSE	FALSE	FALSE	FALSE	FALSE	0	1193.34	78.7164	125.382	58.4003	-4.95505	-0.866456	286	45.3617	-6.02591	-0.136803	216	44.4651	-6.14099	-4.82384	147	42.8299
PV142_Serie2	142	2					2017-07-25	0	0	#DIV/0!			FALSE		FALSE						FALSE	FALSE	FALSE	FALSE	FALSE	FALSE	FALSE	FALSE	FALSE	FALSE	FALSE	FALSE	0	1311.73	85.3991	125.405	60.4836	-9.55596	-1.28842	494	60.4308	-6.10171	-1.54919	349	58.6114	-3.30276	0.0539162	211	54.2616
PV143_Serie1	143	1	F	51	Medio	DIESTRO	2017-07-25	65	160	25.3906	Esteticista	SEDENTARIO	TRUE	LEVE	TRUE	2016-12-14	A	E	CRONICO (>6 meses desde aparición)	ESPORADICO	FALSE	TRUE	FALSE	FALSE	FALSE	FALSE	FALSE	TRUE	FALSE	FALSE	TRUE	TRUE	0	1133.1	50.6754	102.907	60.3732	2.58488	3.2045	527	58.242	4.53436	2.87419	613	55.9807	4.78226	3.68094	440	51.7376
PV143_Serie2	143	2	F	51	Medio	DIESTRO	2017-07-25	65	160	25.3906	Esteticista	SEDENTARIO	TRUE	LEVE	TRUE	2016-12-14	A	E	CRONICO (>6 meses desde aparición)	ESPORADICO	FALSE	TRUE	FALSE	FALSE	FALSE	FALSE	FALSE	TRUE	FALSE	FALSE	TRUE	TRUE	0	1039.51	51.3591	91.513	47.3747	-5.55999	0.0350393	488	47.148	-9.24945	-3.42964	399	45.4524	-8.78201	-0.994892	311	44.5272
PV146_Serie1	146	1	M	66	Superior	DIESTRO	2017-11-03	110	174	36.3324	Medico	SEDENTARIO	FALSE		TRUE	2017-04-10	E	C	SUBAGUDO (3-6 meses desde aparición)	FRECUENTE	FALSE	TRUE	FALSE	FALSE	TRUE	FALSE	TRUE	FALSE	FALSE	FALSE	FALSE	TRUE	0	839.63	23.2972	71.3849	42.8665	2.64285	5.15543	336	41.4105	0.134311	3.1943	131	40.8916	2.11497	6.05518	933	39.2187
PV146_Serie2	146	2	M	66	Superior	DIESTRO	2017-11-03	110	174	36.3324	Medico	SEDENTARIO	FALSE		TRUE	2017-04-10	E	C	SUBAGUDO (3-6 meses desde aparición)	FRECUENTE	FALSE	TRUE	FALSE	FALSE	TRUE	FALSE	TRUE	FALSE	FALSE	FALSE	FALSE	TRUE	0	645.646	23.4951	70.9782	40.8859	1.7429	2.33524	92	38.6445	1.98455	2.6865	239	33.6119	2.38589	4.20802	375	30.189
PV147_Serie1	147	1	M	31	Superior	DIESTRO	2017-11-06	67	169	23.4586	enfermera	MODERADO	TRUE	LEVE	TRUE	2017-04-12	E	C	CRONICO (>6 meses desde aparición)	FRECUENTE	TRUE	TRUE	FALSE	FALSE	FALSE	FALSE	FALSE	FALSE	TRUE	FALSE	TRUE	FALSE	0	991.059	72.4458	97.6992	57.6869	1.476	-6.79009	297	56.4501	5.01909	-4.87145	118	52.2478	3.88256	-3.15101	180	52.1067
PV147_Serie2	147	2	M	31	Superior	DIESTRO	2017-11-06	67	169	23.4586	enfermera	MODERADO	TRUE	LEVE	TRUE	2017-04-12	E	C	CRONICO (>6 meses desde aparición)	FRECUENTE	TRUE	TRUE	FALSE	FALSE	FALSE	FALSE	FALSE	FALSE	TRUE	FALSE	TRUE	FALSE	0	1050.58	72.354	101.243	57.5271	0.0775712	-3.5836	248	57.0067	1.49251	-3.70784	384	56.1652	3.8085	0.543174	183	51.6514
PV148_Serie1	148	1	M	47	Medio	DIESTRO	2017-11-06	88	182	26.5668	diseñador ropa	SEDENTARIO	FALSE		TRUE	2016-07-22			CRONICO (>6 meses desde aparición)	FRECUENTE	FALSE	TRUE	FALSE	FALSE	TRUE	FALSE	TRUE	FALSE	FALSE	FALSE	TRUE	TRUE	0	822.131	31.1413	75.5276	52.7254	-9.66252	2.37254	629	51.4393	-7.99121	1.66746	741	50.4052	-8.88065	1.67199	515	48.9623
PV148_Serie2	148	2	M	47	Medio	DIESTRO	2017-11-06	88	182	26.5668	diseñador ropa	SEDENTARIO	FALSE		TRUE	2016-07-22			CRONICO (>6 meses desde aparición)	FRECUENTE	FALSE	TRUE	FALSE	FALSE	TRUE	FALSE	TRUE	FALSE	FALSE	FALSE	TRUE	TRUE	0	831.963	30.4525	73.338	53.2393	-7.43115	2.52695	183	51.4888	-7.28449	1.34918	59	50.4869	-6.39713	2.82872	521	50.4287
PV149_Serie1	149	1	F	23	Superior	DIESTRO	2017-11-06	70	160	27.3437	estudiante	SEDENTARIO	TRUE	MODERADO	TRUE	2017-05-06	E	B	SUBAGUDO (3-6 meses desde aparición)	FRECUENTE	FALSE	TRUE	FALSE	FALSE	FALSE	FALSE	FALSE	FALSE	FALSE	FALSE	TRUE	TRUE	0	750.311	20.148	79.4432	41.1578	-4.15048	-3.06921	530	37.5503	-2.1045	-2.42297	373	36.433	-3.08126	-3.37803	705	35.9706
PV149_Serie2	149	2	F	23	Superior	DIESTRO	2017-11-06	70	160	27.3437	estudiante	SEDENTARIO	TRUE	MODERADO	TRUE	2017-05-06	E	B	SUBAGUDO (3-6 meses desde aparición)	FRECUENTE	FALSE	TRUE	FALSE	FALSE	FALSE	FALSE	FALSE	FALSE	FALSE	FALSE	TRUE	TRUE	0	1033.77	28.4316	96.3998	53.3575	0.731435	2.42569	530	51.434	0.941325	2.7987	353	50.447	0.699927	2.1439	844	47.8244
PV150_Serie1	150	1	F	51	Básico	DIESTRO	2017-11-06	70	158	28.0404	Militar	MUY PESADO	TRUE	MODERADO	FALSE	2017-08-22			AGUDO (<3meses desde aparición)	ESPORADICO	TRUE	TRUE	FALSE	FALSE	FALSE	FALSE	TRUE	FALSE	FALSE	FALSE	FALSE	TRUE	0	1299.96	44.5803	114.387	79.0496	6.01353	-4.80772	90	78.1306	5.76652	-2.15983	334	77.8262	7.04311	-5.16085	452	77.4125
PV150_Serie2	150	2	F	51	Básico	DIESTRO	2017-11-06	70	158	28.0404	Militar	MUY PESADO	TRUE	MODERADO	FALSE	2017-08-22			AGUDO (<3meses desde aparición)	ESPORADICO	TRUE	TRUE	FALSE	FALSE	FALSE	FALSE	TRUE	FALSE	FALSE	FALSE	FALSE	TRUE	0	1302.52	52.3522	110.57	81.0703	6.32157	-2.85598	564	80.657	0.643514	-5.38216	141	80.6448	-2.12866	-4.27461	459	80.3817
PV151_Serie1	151	1	F	46	Medio	DIESTRO	2017-11-06	71	155	29.5525	Ama de casa	SEDENTARIO	FALSE		TRUE	2016-08-16	E	E	CRONICO (>6 meses desde aparición)	FRECUENTE	TRUE	TRUE	FALSE	FALSE	TRUE	FALSE	FALSE	FALSE	FALSE	FALSE	FALSE	FALSE	0	1008.82	24.3912	89.8008	57.0982	-4.71774	1.41423	723	56.613	-3.11347	1.58487	873	56.5451	-2.60187	1.80687	544	56.3726
PV151_Serie2	151	2	F	46	Medio	DIESTRO	2017-11-06	71	155	29.5525	Ama de casa	SEDENTARIO	FALSE		TRUE	2016-08-16	E	E	CRONICO (>6 meses desde aparición)	FRECUENTE	TRUE	TRUE	FALSE	FALSE	TRUE	FALSE	FALSE	FALSE	FALSE	FALSE	FALSE	FALSE	0	932.961	39.4654	84.6324	58.9939	-3.56718	-1.81279	261	57.2644	-8.3424	-3.94687	551	56.6997	-5.49781	-3.9002	158	55.0266
PV152_Serie1	152	1	M	41	Superior	DIESTRO	2017-11-21	94	189	26.3151		SEDENTARIO	FALSE		TRUE	2017-09-20	E	C	AGUDO (<3meses desde aparición)	FRECUENTE	FALSE	FALSE	FALSE	FALSE	FALSE	FALSE	FALSE	FALSE	FALSE	FALSE	FALSE	FALSE	0	551.199	24.476	61.351	43.8761	9.41989	9.21532	76	40.7286	12.1375	11.4807	287	40.2242	10.38	10.9593	180	38.5161
PV152_Serie2	152	2	M	41	Superior	DIESTRO	2017-11-21	94	189	26.3151		SEDENTARIO	FALSE		TRUE	2017-09-20	E	C	AGUDO (<3meses desde aparición)	FRECUENTE	FALSE	FALSE	FALSE	FALSE	FALSE	FALSE	FALSE	FALSE	FALSE	FALSE	FALSE	FALSE	0	646.674	36.5766	66.1519	53.3177	19.4006	12.2394	192	51.9304	20.8757	14.1213	341	48.9188	21.1218	16.8291	412	45.201
PV153_Serie1	153	1	M	47	Superior	DIESTRO	2017-11-21	80	178	25.2493		SEDENTARIO	TRUE	LEVE	FALSE	2017-09-19	E	C	AGUDO (<3meses desde aparición)	ESPORADICO	FALSE	TRUE	FALSE	FALSE	FALSE	FALSE	FALSE	FALSE	FALSE	FALSE	TRUE	TRUE	0	1021.33	45.923	99.2527	62.075	8.41333	7.12208	153	62.0081	7.74187	7.35108	55	57.8017	9.29224	8.83425	252	55.1888
PV153_Serie2	153	2	M	47	Superior	DIESTRO	2017-11-21	80	178	25.2493		SEDENTARIO	TRUE	LEVE	FALSE	2017-09-19	E	C	AGUDO (<3meses desde aparición)	ESPORADICO	FALSE	TRUE	FALSE	FALSE	FALSE	FALSE	FALSE	FALSE	FALSE	FALSE	TRUE	TRUE	0	852.405	34.9346	81.1135	53.058	-6.73447	-9.64672	239	52.1749	-5.55522	-9.58989	142	50.0945	-5.21839	-9.52038	52	46.7754
PV154_Serie1	154	1	M	49	Medio	DIESTRO	2017-11-21	76	169	26.6097		DE PIE	TRUE	INTENSO	TRUE	2017-06-23	D	E	SUBAGUDO (3-6 meses desde aparición)	FRECUENTE	FALSE	TRUE	FALSE	FALSE	TRUE	FALSE	FALSE	FALSE	FALSE	FALSE	TRUE	TRUE	0	1060.92	40.5549	93.1523	46.8817	7.50033	7.32164	271	46.381	8.95969	9.53112	384	45.9755	10.3367	10.3734	481	45.4239
PV154_Serie2	154	2	M	49	Medio	DIESTRO	2017-11-21	76	169	26.6097		DE PIE	TRUE	INTENSO	TRUE	2017-06-23	D	E	SUBAGUDO (3-6 meses desde aparición)	FRECUENTE	FALSE	TRUE	FALSE	FALSE	TRUE	FALSE	FALSE	FALSE	FALSE	FALSE	TRUE	TRUE	0	944.206	47.8807	91.8685	42.6268	9.19923	-2.39258	328	42.4233	7.4557	-2.00361	239	40.8552	5.98834	-2.30942	145	39.0459
[truncated: 179 more columns]

## Sheet: Variable_View
Patient Characterisation Data	Identification	ID
		Series
		Gender
		Age
		Educational Level
		Dominant Size
	Temporary	Date
	Anthropometric	Weight
		Height
		BMI
	Daily Life Activities	Workplace
		Workplace Intensity
		Physical Activity
		Physical Activity Intensity
Clinical Data: Assessed and Reported Data		Traffic Accident
		Traffic Accident Date
		Type of Scope
		Head Position Scope
		Type of Pain
		Pain Periodicity
		Feeling of Instability
		Contracture
		Surgery
		Rheumatic Disease
		Limitation of Mobility
		SHORT Neck
		Spinal Column Alterations
		Spurling
		Distraction
		Valsalva
		Jackson Compression
		Paravertebral Pain
		Scale WDQ
Clinical Data: Measured Data		Rx.01.Length
		Rx.02.Vel
		Rx.03.MaxRange
		1º Max. Rx
		Acoplado Rz
		Acoplado Ry
		Frame
		2º Max. Rx
		Acoplado Rz
		Acoplado Ry
		Frame
		3º Max. Rx
		Acoplado Rz
		Acoplado Ry
		Frame
		4º Max. Rx
		Acoplado Rz
		Acoplado Ry
		Frame
		5º Max. Rx
		Acoplado Rz
		Acoplado Ry
		Frame
		Media Max.Rx
		µ_Aco.Rz_Flex
		µ_Aco.Ry_Flex
		Rx.05.Max
		Rx.06.MaxMean
		Rx.07.MaxStd
		Rx.08.MaxCV[%]
		1º Min. Rx
		Acoplado Rz
		Acoplado Ry
		Frame
		2º Min. Rx
		Acoplado Rz
		Acoplado Ry
		Frame
		3º Min. Rx
		Acoplado Rz
		Acoplado Ry
		Frame
		4º Min. Rx
		Acoplado Rz
		Acoplado Ry
		Frame
		5º Min. Rx
		Acoplado Rz
		Acoplado Ry
		Frame
		µ_Aco.Rz_Ext
		µ_Aco.Ry_Ext
		Rx.10.Min
		Rx.11.MinMean
		Rx.12.MinStd
		Rx.13.MinCV[%]
		1º Max.Vel.Rx
		Rx
		frame
		2º Max.Vel.Rx
		Rx
		frame
		3º Max.Vel.Rx
		Rx
		frame
		4º Max.Vel.Rx
		Rx
		frame
		5º Max.Vel.Rx
		Rx
		frame
		Rx.15.Speed.Max
		Rx.16.Speed.MaxMean
		Rx.17.Speed.MaxStd
		Rx.18.Speed.MaxCV[%]
		1º Min.Vel.Rx
		Rx
		frame
		2º Min.Vel.Rx
		Rx
		frame
		3º Min.Vel.Rx
		Rx
		frame
		4º Min.Vel.Rx
		Rx
		frame
		5º Min.Vel.Rx
		Rx
		frame
		Rx.20.Speed.Min
		Rx.21.Speed.MinMean
		Rx.22.Speed.MinStd
		Rx.23.Speed.MinCV[%]
		Rz.01.Length
		Rz.02.Vel
		Rz.03.MaxRange
		1º Max. Rz
		Acoplado Rx
		Acoplado Ry
		Frame
		2º Max. Rz
		Acoplado Rx
		Acoplado Ry
		Frame
		3º Max. Rz
		Acoplado Rx
		Acoplado Ry
		Frame
		4º Max. Rz
		Acoplado Rx
		Acoplado Ry
		Frame
		5º Max. Rz
		Acoplado Rx
		Acoplado Ry
		Frame
		µ_Aco.Rx_Right.Lat
		µ_Aco.Ry_Right.Lat
		Rz.05.Max
		Rz.06.MaxMean
		Rz.07.MaxStd
		Rz.08.MaxCV[%]
		1º Min. Rz
		Acoplado Rx
		Acoplado Ry
		Frame
		2º Min. Rz
		Acoplado Rx
		Acoplado Ry
		Frame
		3º Min. Rz
		Acoplado Rx
		Acoplado Ry
		Frame
		4º Min. Rz
		Acoplado Rx
		Acoplado Ry
		Frame
		5º Min. Rz
		Acoplado Rx
		Acoplado Ry
		Frame
		µ_Aco.Rx_Left.Lat
		µ_Aco.Ry_Left.Lat
		Rz.10.Min
		Rz.11.MinMean
		Rz.12.MinStd
		Rz.13.MinCV[%]
		1º Max.Vel.Rz
		Rz
		frame
		2º Max.Vel.Rz
		Rz
		frame
		3º Max.Vel.Rz
		Rz
		frame
		4º Max.Vel.Rz
		Rz
		frame
		5º Max.Vel.Rz
		Rz
		frame
		Rz.15.Speed.Max
		Rz.16.Speed.MaxMean
		Rz.17.Speed.MaxStd
		Rz.18.Speed.MaxCV[%]
		1º Min.Vel.Rz
		Rz
		frame
		2º Min.Vel.Rz
		Rz
		frame
		3º Min.Vel.Rz
		Rz
		frame
		4º Min.Vel.Rz
		Rz
		frame
		5º Min.Vel.Rz
		Rz
		frame
		Rz.20.Speed.Min
		Rz.21.Speed.MinMean
		Rz.22.Speed.MinStd
		Rz.23.Speed.MinCV[%]
		Ry.01.Length
		Ry.02.Vel
		Ry.03.MaxRange
		1º Max. Ry
		Acoplado Rx
		Acoplado Rz
		Frame
		2º Max. Ry
		2º Min.Vel.Rz
		Rz
		frame
		3º Min.Vel.Rz
		Rz
		frame
		4º Min.Vel.Rz
		Rz
		frame
		5º Min.Vel.Rz
		Rz
		frame
		Rz.20.Speed.Min
		Rz.21.Speed.MinMean
		Rz.22.Speed.MinStd
		Rz.23.Speed.MinCV[%]
		Ry.01.Length
		Ry.02.Vel
		Ry.03.MaxRange
		1º Max. Ry
		Acoplado Rx
		Acoplado Rz
		Frame
		2º Max. Ry
		Acoplado Rx
		Acoplado Rz
		Frame
		3º Max. Ry
		Acoplado Rx
		Acoplado Rz
		Frame
		4º Max. Ry
		Acoplado Rx
		Acoplado Rz
		Frame
		5º Max. Ry
		Acoplado Rx
		Acoplado Rz
		Frame
		µ_Aco.Rx_Right.Rot
		µ_Aco.Rz_Right.Rot
		Ry.05.Max
		Ry.06.MaxMean
		Ry.07.MaxStd
		Ry.08.MaxCV[%]
		1º Min. Ry
		Acoplado Rx
		Acoplado Rz
		Frame
		2º Min. Ry
		Acoplado Rx
		Acoplado Rz
		Frame
		3º Min. Ry
		Acoplado Rx
		Acoplado Rz
		Frame
		4º Min. Ry
		Acoplado Rx
		Acoplado Rz
		Frame
		5º Min. Ry
		Acoplado Rx
		Acoplado Rz
		Frame
		µ_Aco.Rx_Left.Rot
		µ_Aco.Rz_Left.Rot
		Ry.10.Min
		Ry.11.MinMean
		Ry.12.MinStd
		Ry.13.MinCV[%]
		1º Max.Vel.Ry
		Ry
		frame
		2º Max.Vel.Ry
		Ry
		frame
		3º Max.Vel.Ry
		Ry
		frame
		4º Max.Vel.Ry
		Ry
		frame
		5º Max.Vel.Ry
		Ry
		frame
		Ry.15.Speed.Max
		Ry.16.Speed.MaxMean
		Ry.17.Speed.MaxStd
		Ry.18.Speed.MaxCV[%]
		1º Min.Vel.Ry
		Ry
		frame
		2º Min.Vel.Ry
		Ry
		frame
		3º Min.Vel.Ry
		Ry
		frame
		4º Min.Vel.Ry
		Ry
		frame
		5º Min.Vel.Ry
		Ry
		frame
		Ry.20.Speed.Min
		Ry.21.Speed.MinMean
		Ry.22.Speed.MinStd
		Ry.23.Speed.MinCV[%]
PAIN
