# Supplementary material
Source: MDPI journal article supplement (https://www.mdpi.com/2076-3417/10/17/5942)
Supplement: s1 [file s1 › 2. Coded database. Supplementary material.xls]

## Sheet: Data_View
Patient Characterisation Data														Clinical Data: Assessed and Reported Data																			(Rx= Flexo-Extension; Ry= Rotation; Rz= Lateralization)					Clinical Data: Measured Data With Sensors
	Identification						Temporary	Anthropometric			Daily Life Activities
	ID	Series	Gender	Age	Educational Level	Dominant Size	Date	Weight	Height	BMI	Physical Activity	Physical Activity Intensity	Workplace Intensity	Traffic Accident	Time Since Traffic Accident	Type of Scope	Head Position Scope	Time since Pain	Pain Periodicity	Paravertebral Pain	Surgery	Rheumatic Disease	SHORT Neck	Spurling	Distraction	Valsalva	Jackson Compression	Scale WDQ	Spinal Column Alterations	Feeling of Instability	Limitation of Mobility	Contracture	Rx.01.Length	Rx.02.Vel	Rx.03.MaxRange	1º Max. Rx	Acoplado Rz	Acoplado Ry	Frame	2º Max. Rx	Acoplado Rz	Acoplado Ry	Frame	3º Max. Rx	Acoplado Rz	Acoplado Ry	Frame	4º Max. Rx	Acoplado Rz
PV001_Serie1	1	1	F	30-55	University studies	DIESTRO	2017-04-19	<60	158-185	<24	FALSE	LEVE	DE PIE	FALSE						FALSE	FALSE	FALSE	FALSE	FALSE	FALSE	FALSE	FALSE	0	FALSE	FALSE	FALSE	FALSE	1553.73	73.0137	136.088	76.4013	-0.189129	-5.38368	244	74.9311	4.66077	-1.89362	423	73.3684	0.667532	-2.80838	155	72.6113	1.71383
PV001_Serie2	1	2	F	30-55	University studies	DIESTRO	2017-04-19	<60	158-185	<24	FALSE	LEVE	DE PIE	FALSE						FALSE	FALSE	FALSE	FALSE	FALSE	FALSE	FALSE	FALSE	0	FALSE	FALSE	FALSE	FALSE	1347.92	84.2452	129.752	73.7302	-1.90877	-3.79424	121	73.3793	-0.604915	-4.79812	47	72.2458	1.15756	-3.44119	198	69.8514	2.82323
PV002_Serie1	2	1	F	<30	University studies	DIESTRO	2017-04-19	<60	158-185	<24	TRUE	MODERADO	DE PIE	FALSE				2	Frequent	FALSE	FALSE	FALSE	FALSE	FALSE	FALSE	FALSE	FALSE	0	FALSE	FALSE	FALSE	FALSE	1581.68	69.1296	135.135	82.9657	10.4227	-9.00143	55	82.7574	9.04938	-4.20595	428	82.5559	9.43272	-7.56559	627	81.2439	13.7403
PV002_Serie2	2	2	F	<30	University studies	DIESTRO	2017-04-19	<60	158-185	<24	TRUE	MODERADO	DE PIE	FALSE				2	Frequent	FALSE	FALSE	FALSE	FALSE	FALSE	FALSE	FALSE	FALSE	0	FALSE	FALSE	FALSE	FALSE	1637.89	77.5518	139.416	81.6892	13.4468	-4.62368	399	81.617	11.3162	-4.80377	218	81.4126	7.32755	-7.07728	52	81.1982	13.8061
PV003_Serie1	3	1	F	30-55	University studies	DIESTRO	2017-04-20	<60	158-185	<24	FALSE	LEVE	DE PIE	FALSE				2	Frequent	FALSE	FALSE	FALSE	FALSE	FALSE	FALSE	FALSE	FALSE	0	FALSE	FALSE	TRUE	FALSE	1456.27	41.3713	127.418	66.8491	-3.47065	-1.58179	832	65.0846	-6.22486	-1.79429	418	64.6338	-5.35415	-2.29151	266	64.5918	-4.76915
PV003_Serie2	3	2	F	30-55	University studies	DIESTRO	2017-04-20	<60	158-185	<24	FALSE	LEVE	DE PIE	FALSE				2	Frequent	FALSE	FALSE	FALSE	FALSE	FALSE	FALSE	FALSE	FALSE	0	FALSE	FALSE	TRUE	FALSE	1396.32	42.5187	124.034	69.3839	-5.54654	-2.11921	484	68.1798	-5.34356	-2.89489	895	67.2031	-6.2203	-2.7198	612	66.4154	-4.89954
PV004_Serie1	4	1	F	30-55	University studies	DIESTRO	2017-04-21	60-85	158-185	24-30	TRUE	MODERADO	DE PIE	FALSE						TRUE	FALSE	FALSE	FALSE	FALSE	FALSE	FALSE	TRUE	1-25	FALSE	FALSE	FALSE	FALSE	1387.79	35.9903	118.949	73.3373	-2.77259	-6.73336	1043	72.5936	-4.65001	-5.31996	904	71.8484	-3.60579	-4.22217	300	71.7532	-4.72608
PV004_Serie2	4	2	F	30-55	University studies	DIESTRO	2017-04-21	60-85	158-185	24-30	TRUE	MODERADO	DE PIE	FALSE						TRUE	FALSE	FALSE	FALSE	FALSE	FALSE	FALSE	TRUE	1-25	FALSE	FALSE	FALSE	FALSE	1400.28	46.0619	119.412	71.6467	-1.43266	-1.04164	845	71.1581	-2.29372	-2.75151	724	69.8731	-4.63221	-0.236504	358	69.6553	-2.93143
PV005_Serie1	5	1	F	30-55	University studies	DIESTRO	2017-04-21	<60	<158	<24	FALSE	LEVE	SEDENTARIO	FALSE				2	Discontinuous	TRUE	FALSE	FALSE	FALSE	FALSE	FALSE	FALSE	FALSE	26-50	FALSE	FALSE	FALSE	TRUE	1609.8	61.1627	138.915	67.7001	-0.863922	-4.63041	57	67.0734	2.39866	-4.62523	158	64.6482	1.63204	-3.39839	389	63.5588	0.772023
PV005_Serie2	5	2	F	30-55	University studies	DIESTRO	2017-04-21	<60	<158	<24	FALSE	LEVE	SEDENTARIO	FALSE				2	Discontinuous	TRUE	FALSE	FALSE	FALSE	FALSE	FALSE	FALSE	FALSE	26-50	FALSE	FALSE	FALSE	TRUE	1632.75	52.1312	142.237	71.308	0.377523	-4.86903	191	69.082	-1.43806	-6.249	54	68.3641	-1.09373	-4.43293	837	66.9797	-2.60318
PV006_Serie1	6	1	F	30-55	Bachelor	DIESTRO	2017-04-21	<60	158-185	<24	FALSE	LEVE	DE PIE	TRUE	<180	E	D	0	Frequent	TRUE	FALSE	FALSE	FALSE	FALSE	FALSE	FALSE	FALSE	>50	FALSE	FALSE	TRUE	TRUE	1074.52	80.9123	108.357	68.3863	-3.59499	-5.42263	115	63.2477	-2.80825	-5.73946	181	59.9054	-3.4858	-6.20427	355	58.4108	1.44678
PV006_Serie2	6	2	F	30-55	Bachelor	DIESTRO	2017-04-21	<60	158-185	<24	FALSE	LEVE	DE PIE	TRUE	<180	E	D	0	Frequent	TRUE	FALSE	FALSE	FALSE	FALSE	FALSE	FALSE	FALSE	>50	FALSE	FALSE	TRUE	TRUE	1120.46	104.912	119.439	65.6278	3.08136	-1.74973	100	63.4726	5.59469	-0.954092	195	61.7867	7.13287	-1.58215	147	61.1589	0.587608
PV007_Serie1	7	1	M	<30	University studies	DIESTRO	2017-04-21	>85	158-185	24-30	TRUE	MODERADO	DE PIE	FALSE						FALSE	FALSE	FALSE	FALSE	FALSE	FALSE	FALSE	FALSE	0	FALSE	FALSE	FALSE	TRUE	1646.02	62.9213	141.604	67.9902	2.69254	-1.33498	592	66.5242	1.99368	-5.08859	729	65.6665	0.102133	-6.8457	377	65.0148	1.79501
PV007_Serie2	7	2	M	<30	University studies	DIESTRO	2017-04-21	>85	158-185	24-30	TRUE	MODERADO	DE PIE	FALSE						FALSE	FALSE	FALSE	FALSE	FALSE	FALSE	FALSE	FALSE	0	FALSE	FALSE	FALSE	TRUE	1592.48	67.2501	137.215	64.7627	4.29718	-3.27633	460	64.2268	9.47425	2.20613	151	62.5682	5.19576	-4.18435	359	62.1186	2.91391
PV008_Serie1	8	1	F	30-55	University studies	DIESTRO	2017-04-25	<60	158-185	<24	FALSE	LEVE		TRUE	<180	B	C	2	Frequent	FALSE	FALSE	FALSE	FALSE	FALSE	FALSE	FALSE	FALSE	26-50	FALSE	FALSE	FALSE	FALSE	1234.41	74.1832	115.95	60.8108	2.16844	-0.678045	283	59.6624	2.72856	2.10191	361	59.4114	0.0731882	-1.7467	52	59.2068	2.11249
PV008_Serie2	8	2	F	30-55	University studies	DIESTRO	2017-04-25	<60	158-185	<24	FALSE	LEVE		TRUE	<180	B	C	2	Frequent	FALSE	FALSE	FALSE	FALSE	FALSE	FALSE	FALSE	FALSE	26-50	FALSE	FALSE	FALSE	FALSE	1241.53	89.9658	117.22	59.3988	-0.131608	-3.24286	301	58.7888	0.810593	0.419588	111	58.7111	2.26975	-2.31105	178	58.2879	3.57218
PV009_Serie1	9	1	F	30-55	University studies	DIESTRO	2017-04-25	60-85	158-185	24-30	FALSE	LEVE	DE PIE	TRUE	>365	B	C	2	Sporadic	TRUE	FALSE	FALSE	FALSE	FALSE	FALSE	FALSE	FALSE	1-25	FALSE	TRUE	FALSE	TRUE	1164.01	34.9764	106.177	55.3862	-0.639791	0.153346	79	53.0689	-2.00393	0.26829	237	52.5545	-3.22997	-2.27029	649	51.1062	-4.76995
PV009_Serie2	9	2	F	30-55	University studies	DIESTRO	2017-04-25	60-85	158-185	24-30	FALSE	LEVE	DE PIE	TRUE	>365	B	C	2	Sporadic	TRUE	FALSE	FALSE	FALSE	FALSE	FALSE	FALSE	FALSE	1-25	FALSE	TRUE	FALSE	TRUE	1125.69	31.444	102.717	54.4285	-4.34505	-4.50564	78	53.0887	-5.75507	-6.17577	824	51.6843	-6.71864	-6.30587	973	51.2988	-3.50767
PV010_Serie1	10	1	F	30-55	High school	DIESTRO	2017-04-26	>85	158-185	>30	FALSE	LEVE	MODERADO	FALSE				2	Frequent	TRUE	FALSE	FALSE	FALSE	FALSE	FALSE	FALSE	FALSE	1-25	TRUE	TRUE	FALSE	TRUE	957.872	51.8329	93.0461	48.7939	1.86036	-4.57609	482	45.5453	2.42039	-4.37281	316	45.4453	2.7336	-4.38717	395	44.522	3.23758
PV010_Serie2	10	2	F	30-55	High school	DIESTRO	2017-04-26	>85	158-185	>30	FALSE	LEVE	MODERADO	FALSE				2	Frequent	TRUE	FALSE	FALSE	FALSE	FALSE	FALSE	FALSE	FALSE	1-25	TRUE	TRUE	FALSE	TRUE	913.574	49.7589	87.9236	44.3739	4.92664	-3.19895	272	44.1824	3.20347	-4.7493	354	44.0235	5.28122	-2.75355	437	42.0159	4.55405
PV011_Serie1	11	1	F	30-55	Bachelor	DIESTRO	2017-05-26	60-85	158-185	<24	TRUE	MODERADO	SEDENTARIO	FALSE						TRUE	FALSE	FALSE	FALSE	FALSE	FALSE	FALSE	FALSE	1-25	FALSE	FALSE	FALSE	FALSE	897.392	38.9493	84.3635	40.8689	0.568325	0.0721552	607	39.8723	0.287426	-0.782758	510	39.8033	-0.726412	-2.50752	84	39.4546	0.364662
PV011_Serie2	11	2	F	30-55	Bachelor	DIESTRO	2017-05-26	60-85	158-185	<24	TRUE	MODERADO	SEDENTARIO	FALSE						TRUE	FALSE	FALSE	FALSE	FALSE	FALSE	FALSE	FALSE	1-25	FALSE	FALSE	FALSE	FALSE	820.051	53.3887	80.1779	45.1655	4.72286	-2.24639	401	43.1781	4.78273	-1.82315	330	41.8602	3.71804	-0.44278	189	41.8373	4.6529
PV012_Serie1	12	1	F	30-55	University studies	DIESTRO	2017-04-26	<60	158-185	<24	TRUE	MODERADO	SEDENTARIO	FALSE						FALSE	FALSE	FALSE	FALSE	FALSE	FALSE	FALSE	FALSE	1-25	FALSE	FALSE	FALSE	FALSE	1528.46	57.6341	133.081	68.0603	-1.72817	-3.53011	736	67.6138	-2.70749	-4.17218	403	67.2105	-5.21121	-1.0793	509	66.6072	-0.243631
PV012_Serie2	12	2	F	30-55	University studies	DIESTRO	2017-04-26	<60	158-185	<24	TRUE	MODERADO	SEDENTARIO	FALSE						FALSE	FALSE	FALSE	FALSE	FALSE	FALSE	FALSE	FALSE	1-25	FALSE	FALSE	FALSE	FALSE	1453.84	56.9688	127.054	71.15	-3.38863	-5.00848	272	71.13	-2.6944	-4.3043	692	70.6988	-5.38244	-5.98016	160	70.1361	-4.59788
PV013_Serie1	13	1	F	<30	Bachelor	DIESTRO	2017-04-28	<60	<158	24-30	FALSE	LEVE	DE PIE	FALSE						FALSE	FALSE	FALSE	FALSE	FALSE	FALSE	FALSE	FALSE	26-50	FALSE	FALSE	FALSE	FALSE	1193.72	54.4579	105.019	51.925	3.17936	-2.02355	363	51.242	-2.09707	-2.09187	454	50.194	-1.4847	-3.02968	623	49.8101	-1.08795
PV013_Serie2	13	2	F	<30	Bachelor	DIESTRO	2017-04-28	<60	<158	24-30	FALSE	LEVE	DE PIE	FALSE						FALSE	FALSE	FALSE	FALSE	FALSE	FALSE	FALSE	FALSE	26-50	FALSE	FALSE	FALSE	FALSE	994.069	48.5385	93.3918	54.7337	-1.7829	-4.66745	253	50.0557	0.177457	-4.21041	167	49.7851	1.89699	-3.3118	330	49.4657	-0.423764
PV014_Serie1	80	1	F	<30	Bachelor	DIESTRO	2017-06-06	<60	158-185	<24	TRUE	INTENSO	SEDENTARIO	FALSE						FALSE	FALSE	FALSE	FALSE	FALSE	FALSE	FALSE	FALSE	1-25	FALSE	FALSE	FALSE	TRUE	1120.12	58.9535	103.51	60.9237	1.38422	1.43219	221	57.3428	1.04439	-0.7482	139	57.0719	0.170315	0.489118	302	56.2876	5.12933
PV014_Serie2	80	2	F	<30	Bachelor	DIESTRO	2017-06-06	<60	158-185	<24	TRUE	INTENSO	SEDENTARIO	FALSE						FALSE	FALSE	FALSE	FALSE	FALSE	FALSE	FALSE	FALSE	1-25	FALSE	FALSE	FALSE	TRUE	1363.25	56.8971	118.057	64.9419	-0.948898	-0.189647	190	64.3988	-2.00328	-0.563615	391	64.3962	-1.66645	-0.742539	295	64.3171	-2.46475
PV015_Serie1	15	1	F	30-55	High school	DIESTRO	2017-05-28	<60	<158	<24	TRUE	LEVE	MODERADO	TRUE	>365	F	C	2	Frequent	TRUE	FALSE	FALSE	FALSE	FALSE	FALSE	FALSE	TRUE	1-25	TRUE	FALSE	TRUE	TRUE	1117.36	33.2944	103.275	57.9642	-1.2295	-0.402121	893	54.975	-0.267523	-0.340022	762	54.0904	-0.403337	-0.680072	631	51.309	0.136214
PV015_Serie2	15	2	F	30-55	High school	DIESTRO	2017-05-28	<60	<158	<24	TRUE	LEVE	MODERADO	TRUE	>365	F	C	2	Frequent	TRUE	FALSE	FALSE	FALSE	FALSE	FALSE	FALSE	TRUE	1-25	TRUE	FALSE	TRUE	TRUE	1118.83	50.3071	104.25	62.6104	1.32617	1.13209	430	59.7602	-0.37499	-0.258558	340	56.4861	1.14615	0.714081	520	53.8276	0.421482
PV016_Serie1	16	1	F	30-55	University studies	DIESTRO	2017-04-28	<60	158-185	<24	TRUE	LEVE	DE PIE	FALSE				2	Frequent	FALSE	FALSE	FALSE	FALSE	FALSE	FALSE	FALSE	FALSE	>50	FALSE	TRUE	TRUE	FALSE	873.652	28.2918	76.6436	49.1716	-3.59187	-5.10614	729	47.9467	-3.73547	-6.85705	608	47.9441	-3.87102	-6.8506	839	46.7204	-3.01869
PV016_Serie2	16	2	F	30-55	University studies	DIESTRO	2017-04-28	<60	158-185	<24	TRUE	LEVE	DE PIE	FALSE				2	Frequent	FALSE	FALSE	FALSE	FALSE	FALSE	FALSE	FALSE	FALSE	>50	FALSE	TRUE	TRUE	FALSE	703.652	20.1504	66.3051	45.6654	-0.993945	-3.03379	606	45.4969	1.48486	-2.76704	97	43.2485	-0.660478	-2.57018	466	42.6322	-1.24731
PV017_Serie1	17	1	F	<30	University studies	DIESTRO	2017-05-02	60-85	<158	24-30	FALSE	LEVE	DE PIE	FALSE						FALSE	FALSE	FALSE	FALSE	FALSE	FALSE	FALSE	FALSE	0	FALSE	FALSE	FALSE	FALSE	1673.76	78.3596	145.926	83.0947	10.1411	-0.678047	614	82.4374	7.8021	-4.8244	351	81.6248	10.5592	-1.29211	525	81.3357	12.2104
PV017_Serie2	17	2	F	<30	University studies	DIESTRO	2017-05-02	60-85	<158	24-30	FALSE	LEVE	DE PIE	FALSE						FALSE	FALSE	FALSE	FALSE	FALSE	FALSE	FALSE	FALSE	0	FALSE	FALSE	FALSE	FALSE	1501.85	98.8061	141.252	89.7564	4.46656	-0.0696812	397	87.8107	5.31229	-0.851288	195	87.759	2.97097	1.48268	264	86.1738	6.16948
PV018_Serie1	18	1	M	>55	High school	DIESTRO	2017-05-02	60-85	<158	24-30	TRUE	MODERADO	DE PIE	FALSE				0	Frequent	TRUE	FALSE	FALSE	FALSE	FALSE	FALSE	FALSE	FALSE	1-25	TRUE	TRUE	FALSE	TRUE	1047.28	52.5742	98.8551	56.2766	9.23252	-3.41624	262	54.1292	8.13848	-3.30754	353	53.7625	8.68802	-3.87005	69	53.4116	8.88302
PV018_Serie2	18	2	M	>55	High school	DIESTRO	2017-05-02	60-85	<158	24-30	TRUE	MODERADO	DE PIE	FALSE				0	Frequent	TRUE	FALSE	FALSE	FALSE	FALSE	FALSE	FALSE	FALSE	1-25	TRUE	TRUE	FALSE	TRUE	802.65	52.3923	79.3416	44.5028	4.82022	-1.20187	402	41.9983	5.63588	-0.464207	336	39.397	3.73372	-0.391889	271	39.0721	2.37738
PV019_Serie1	19	1	F	<30	University studies	DIESTRO	2017-05-02	60-85	158-185	24-30	TRUE	MODERADO	DE PIE	FALSE						FALSE	FALSE	FALSE	FALSE	FALSE	FALSE	FALSE	FALSE	0	FALSE	FALSE	FALSE	FALSE	1330.44	36.7119	114.446	63.6929	-4.06202	-5.28201	400	62.9464	-5.02949	-8.71663	564	61.8732	-3.61196	-5.42356	989	61.8246	-2.77727
PV019_Serie2	19	2	F	<30	University studies	DIESTRO	2017-05-02	60-85	158-185	24-30	TRUE	MODERADO	DE PIE	FALSE						FALSE	FALSE	FALSE	FALSE	FALSE	FALSE	FALSE	FALSE	0	FALSE	FALSE	FALSE	FALSE	1415.11	40.5243	125.099	70.5006	5.06427	-4.68793	91	67.3681	3.79162	-2.63962	253	67.2059	-4.21269	-5.11083	964	66.8915	-1.11764
PV020_Serie1	20	1	M	30-55	University studies	DIESTRO	2017-05-03	60-85	158-185	24-30	TRUE	MODERADO	SEDENTARIO	FALSE						FALSE	FALSE	FALSE	FALSE	FALSE	FALSE	FALSE	FALSE	0	FALSE	FALSE	FALSE	FALSE	1208.82	40.7283	105.458	64.2788	2.24232	-0.967523	808	63.7387	0.153005	-0.841905	703	63.6997	-0.0519457	-1.78433	339	63.6935	-1.16875
PV020_Serie2	20	2	M	30-55	University studies	DIESTRO	2017-05-03	60-85	158-185	24-30	TRUE	MODERADO	SEDENTARIO	FALSE						FALSE	FALSE	FALSE	FALSE	FALSE	FALSE	FALSE	FALSE	0	FALSE	FALSE	FALSE	FALSE	1105.82	40.2997	95.6867	59.4439	-1.48218	-3.65932	67	58.8731	1.13157	-0.136972	641	58.3298	1.06323	-3.13004	305	58.1438	-0.0824964
PV021_Serie1	21	1	F	30-55	Bachelor	AMBIDIESTRO	2017-05-03	60-85	158-185	<24	TRUE	LEVE	SEDENTARIO	TRUE		E		2	Sporadic	FALSE	FALSE	FALSE	FALSE	FALSE	FALSE	FALSE	FALSE	0	FALSE	FALSE	FALSE	FALSE	1088.58	49.0351	114.297	52.0228	5.50825	1.55137	75	44.4256	4.7675	-0.197024	168	42.5293	3.44417	0.163901	381	40.9526	5.17005
PV021_Serie2	21	2	F	30-55	Bachelor	AMBIDIESTRO	2017-05-03	60-85	158-185	<24	TRUE	LEVE	SEDENTARIO	TRUE		E		2	Sporadic	FALSE	FALSE	FALSE	FALSE	FALSE	FALSE	FALSE	FALSE	0	FALSE	FALSE	FALSE	FALSE	1075.05	51.3888	105.727	38.4192	4.02428	-3.16045	271	36.9866	6.48272	-2.69338	366	35.6869	7.10925	-2.31587	167	34.9463	7.61442
PV022_Serie1	22	1	F	30-55	University studies	DIESTRO	2017-05-03	60-85	158-185	24-30	TRUE	MODERADO	MODERADO	TRUE	<180	B	D	2	Frequent	TRUE	FALSE	FALSE	FALSE	FALSE	FALSE	FALSE	FALSE	>50	TRUE	TRUE	TRUE	TRUE	1242.67	53.9352	110.378	50.7024	5.20603	-0.44794	447	50.4172	2.91637	-0.137793	76	48.6073	5.41643	-0.76302	357	48.1987	8.39291
PV022_Serie2	22	2	F	30-55	University studies	DIESTRO	2017-05-03	60-85	158-185	24-30	TRUE	MODERADO	MODERADO	TRUE	<180	B	D	2	Frequent	TRUE	FALSE	FALSE	FALSE	FALSE	FALSE	FALSE	FALSE	>50	TRUE	TRUE	TRUE	TRUE	1265.04	41.7228	108.839	51.0298	-1.23036	-5.15837	821	50.1854	2.30899	-4.28153	314	49.4555	2.58611	-2.90629	63	49.2115	-0.566936
PV023_Serie1	23	1	F	>55	University studies	ZURDO	2017-05-03	<60	<158	<24	FALSE	LEVE	MODERADO	FALSE				0	Frequent	TRUE	FALSE	FALSE	FALSE	TRUE	FALSE	FALSE	TRUE	>50	FALSE	FALSE	TRUE	TRUE	558.412	18.9164	58.1804	30.3613	5.64758	-3.14768	235	26.7331	5.01121	-4.16594	385	26.102	5.52468	-2.91632	638	26.0749	4.47933
PV023_Serie2	23	2	F	>55	University studies	ZURDO	2017-05-03	<60	<158	<24	FALSE	LEVE	MODERADO	FALSE				0	Frequent	TRUE	FALSE	FALSE	FALSE	TRUE	FALSE	FALSE	TRUE	>50	FALSE	FALSE	TRUE	TRUE	493.722	23.9671	50.8502	32.0379	5.38528	-2.71997	454	28.2138	5.19957	-3.74986	275	27.2663	5.54695	-1.34258	72	26.8389	5.17395
PV024_Serie1	24	1	F	30-55	Bachelor	DIESTRO	2017-05-03	<60	<158	<24	TRUE	MODERADO	DE PIE	FALSE				2	Frequent	TRUE	FALSE	FALSE	FALSE	TRUE	FALSE	FALSE	FALSE	1-25	TRUE	TRUE	TRUE	TRUE	966.253	13.4351	79.7261	44.5407	7.11475	0.297634	329	43.9485	5.6539	-1.28174	907	41.0155	7.97718	0.955927	662	41.0041	6.1724
PV024_Serie2	24	2	F	30-55	Bachelor	DIESTRO	2017-05-03	<60	<158	<24	TRUE	MODERADO	DE PIE	FALSE				2	Frequent	TRUE	FALSE	FALSE	FALSE	TRUE	FALSE	FALSE	FALSE	1-25	TRUE	TRUE	TRUE	TRUE	792.087	11.0073	70.2699	44.1314	3.07602	0.978958	1108	43.6116	5.10101	0.700533	489	42.9341	3.24006	0.251839	801	40.1059	2.1301
PV025_Serie1	25	1	M	30-55	University studies	DIESTRO	2017-05-05	60-85	158-185	<24	FALSE	LEVE	SEDENTARIO	FALSE				2	Frequent	FALSE	FALSE	FALSE	FALSE	FALSE	FALSE	FALSE	FALSE	26-50	FALSE	FALSE	FALSE	TRUE	1291.91	45.0458	112.604	58.7613	-0.860776	-1.534	672	56.9329	-0.761844	-1.03003	783	56.7199	0.27528	0.616115	558	54.8381	-0.122054
PV025_Serie2	25	2	M	30-55	University studies	DIESTRO	2017-05-05	60-85	158-185	<24	FALSE	LEVE	SEDENTARIO	FALSE				2	Frequent	FALSE	FALSE	FALSE	FALSE	FALSE	FALSE	FALSE	FALSE	26-50	FALSE	FALSE	FALSE	TRUE	1215.16	37.5514	108.359	58.3139	-6.03332	3.27721	388	56.1531	-4.68631	1.31378	886	53.9988	-3.76925	2.88921	769	53.7572	-3.81617
PV026_Serie1	26	1	F	30-55	University studies	DIESTRO	2017-05-05	<60	158-185	<24	TRUE	LEVE	DE PIE	FALSE						FALSE	FALSE	FALSE	FALSE	FALSE	FALSE	FALSE	FALSE	0	FALSE	FALSE	FALSE	FALSE	1535.39	72.0162	132.301	75.5497	4.87775	4.00215	71	74.997	2.06491	3.16691	266	74.7645	1.85964	3.83071	523	74.682	2.03716
PV026_Serie2	26	2	F	30-55	University studies	DIESTRO	2017-05-05	<60	158-185	<24	TRUE	LEVE	DE PIE	FALSE						FALSE	FALSE	FALSE	FALSE	FALSE	FALSE	FALSE	FALSE	0	FALSE	FALSE	FALSE	FALSE	1501.9	76.9414	130.45	77.0164	-0.163341	1.85506	482	76.565	-2.26294	-0.331773	329	76.0487	-0.606012	0.0556157	248	75.6768	-0.305572
PV027_Serie1	27	1	F	30-55	Bachelor	DIESTRO	2017-05-05	60-85	158-185	24-30	TRUE	LEVE	SEDENTARIO	FALSE						FALSE	FALSE	FALSE	FALSE	FALSE	FALSE	FALSE	FALSE	0	FALSE	FALSE	FALSE	FALSE	1343.79	49.187	114.713	54.2501	1.3983	1.85637	96	53.7211	4.47881	1.6753	560	53.6224	5.67241	3.06665	667	52.9808	5.10406
PV027_Serie2	27	2	F	30-55	Bachelor	DIESTRO	2017-05-05	60-85	158-185	24-30	TRUE	LEVE	SEDENTARIO	FALSE						FALSE	FALSE	FALSE	FALSE	FALSE	FALSE	FALSE	FALSE	0	FALSE	FALSE	FALSE	FALSE	1146.57	55.4433	102.207	48.0617	1.08883	0.888827	54	47.7986	4.43507	3.01088	571	47.2638	-0.556965	1.03239	247	46.741	-0.258089
PV028_Serie1	28	1	F	30-55	Bachelor	DIESTRO	2017-05-05	60-85	158-185	24-30	TRUE	MODERADO	DE PIE	FALSE				2	Frequent	TRUE	FALSE	FALSE	FALSE	FALSE	FALSE	FALSE	FALSE	1-25	FALSE	FALSE	FALSE	TRUE	1147.01	54.7235	103.079	50.8166	-3.40749	-3.98654	572	49.937	-0.863898	-1.99032	216	49.0443	-1.33144	-1.97732	308	47.8294	-2.15646
PV028_Serie2	28	2	F	30-55	Bachelor	DIESTRO	2017-05-05	60-85	158-185	24-30	TRUE	MODERADO	DE PIE	FALSE				2	Frequent	TRUE	FALSE	FALSE	FALSE	FALSE	FALSE	FALSE	FALSE	1-25	FALSE	FALSE	FALSE	TRUE	1006.15	56.1466	97.2116	43.3903	-6.1614	1.34215	368	43.2117	-6.95269	-1.67014	450	41.6437	-5.06042	-3.76698	196	41.4911	-6.59275
PV029_Serie1	29	1	F	30-55	High school	DIESTRO	2017-05-05	>85	<158	>30	FALSE	LEVE	MODERADO	FALSE				2	Frequent	FALSE	FALSE	FALSE	FALSE	FALSE	FALSE	FALSE	TRUE	>50	FALSE	FALSE	TRUE	TRUE	1148.75	61.894	111.525	53.6968	3.58761	5.19489	346	52.5241	2.47578	4.162	269	50.0995	4.21565	5.21093	425	48.618	1.57007
PV029_Serie2	29	2	F	30-55	High school	DIESTRO	2017-05-05	>85	<158	>30	FALSE	LEVE	MODERADO	FALSE				2	Frequent	FALSE	FALSE	FALSE	FALSE	FALSE	FALSE	FALSE	TRUE	>50	FALSE	FALSE	TRUE	TRUE	1257.98	61.3053	111.219	58.3809	-0.451542	5.84527	589	57.4217	-2.30867	4.84078	258	57.2117	-0.790688	5.4132	342	55.5928	-0.202569
PV030_Serie1	30	1	F	>55	University studies	DIESTRO	2017-05-09	60-85	158-185	<24	TRUE	MODERADO	SEDENTARIO	FALSE				2	Sporadic	FALSE	FALSE	FALSE	FALSE	FALSE	FALSE	FALSE	FALSE	26-50	FALSE	FALSE	FALSE	FALSE	1386.88	30.2812	118.384	59.761	-4.50288	-0.693002	499	59.3179	-5.06237	-1.65698	301	59.1905	-6.15949	-1.23565	686	58.7256	-5.39888
PV030_Serie2	30	2	F	>55	University studies	DIESTRO	2017-05-09	60-85	158-185	<24	TRUE	MODERADO	SEDENTARIO	FALSE				2	Sporadic	FALSE	FALSE	FALSE	FALSE	FALSE	FALSE	FALSE	FALSE	26-50	FALSE	FALSE	FALSE	FALSE	1417.49	27.5134	120.707	57.9566	-1.55543	-0.788213	1395	57.1911	-1.26437	0.116206	1178	56.9097	-1.88142	-1.09742	332	56.6705	-3.83303
PV031_Serie1	31	1	M	30-55	University studies	DIESTRO	2017-05-10	60-85	158-185	24-30	TRUE	INTENSO	MUY PESADO	FALSE				2	Frequent	FALSE	FALSE	FALSE	FALSE	FALSE	FALSE	FALSE	FALSE	1-25	FALSE	FALSE	FALSE	TRUE	1733.32	55.8414	137.956	61.5615	1.28847	-0.267264	621	60.373	2.11356	1.19848	505	60.1062	3.39009	0.0999281	257	59.4427	2.08252
PV031_Serie2	31	2	M	30-55	University studies	DIESTRO	2017-05-10	60-85	158-185	24-30	TRUE	INTENSO	MUY PESADO	FALSE				2	Frequent	FALSE	FALSE	FALSE	FALSE	FALSE	FALSE	FALSE	FALSE	1-25	FALSE	FALSE	FALSE	TRUE	1625.03	43.4964	133.775	62.0781	2.61005	-0.561259	464	61.7321	3.41338	0.347997	616	61.448	0.696587	-0.271772	754	59.3134	1.84804
PV032_Serie1	32	1	M	30-55	University studies	DIESTRO	2017-05-10	60-85	158-185	<24	FALSE	LEVE	SEDENTARIO	FALSE				2	Sporadic	TRUE	FALSE	FALSE	FALSE	FALSE	FALSE	FALSE	FALSE	1-25	FALSE	FALSE	TRUE	TRUE	1377.34	63.2967	119.049	56.6648	-1.94894	0.0816652	433	56.6172	-2.39364	0.408683	347	54.7801	-3.59515	0.44745	615	54.2898	-1.72109
PV032_Serie2	32	2	M	30-55	University studies	DIESTRO	2017-05-10	60-85	158-185	<24	FALSE	LEVE	SEDENTARIO	FALSE				2	Sporadic	TRUE	FALSE	FALSE	FALSE	FALSE	FALSE	FALSE	FALSE	1-25	FALSE	FALSE	TRUE	TRUE	1195.83	66.2874	111.466	53.0751	-1.56236	-1.80081	400	52.3585	0.0775661	-0.849361	317	51.9075	0.391862	-2.20496	477	51.4908	0.191591
PV033_Serie1	33	1	F	>55	Bachelor	DIESTRO	2017-05-10	>85	158-185	>30	FALSE	LEVE	MODERADO	FALSE				2	Frequent	FALSE	FALSE	FALSE	FALSE	FALSE	FALSE	FALSE	FALSE	1-25	FALSE	TRUE	TRUE	TRUE	1159.76	34.9746	100.874	56.7241	-5.42266	-2.51036	251	56.6939	-3.75872	-2.71232	402	56.0652	-5.81602	-2.37016	97	54.8733	-4.37085
PV033_Serie2	33	2	F	>55	Bachelor	DIESTRO	2017-05-10	>85	158-185	>30	FALSE	LEVE	MODERADO	FALSE				2	Frequent	FALSE	FALSE	FALSE	FALSE	FALSE	FALSE	FALSE	FALSE	1-25	FALSE	TRUE	TRUE	TRUE	1194.7	28.8297	101.68	60.545	-9.38218	-3.10103	600	59.8057	-6.85578	-1.42603	422	59.6208	-8.15785	-2.01835	780	59.4585	-8.46415
PV034_Serie1	34	1	F	<30	University studies		2017-05-10	<60	158-185	<24	TRUE	LEVE	SEDENTARIO	TRUE	>365	E	C	2	Frequent	TRUE	FALSE	FALSE	FALSE	FALSE	FALSE	FALSE	FALSE	26-50	TRUE	FALSE	FALSE	TRUE	1363.57	45.2111	118.567	62.29	-6.93733	-3.675	221	60.9199	-7.48955	-4.16925	717	60.4675	-7.10253	-4.9967	352	60.3224	-5.48579
PV034_Serie2	34	2	F	<30	University studies		2017-05-10	<60	158-185	<24	TRUE	LEVE	SEDENTARIO	TRUE	>365	E	C	2	Frequent	TRUE	FALSE	FALSE	FALSE	FALSE	FALSE	FALSE	FALSE	26-50	TRUE	FALSE	FALSE	TRUE	1242.62	44.4428	111.433	66.8341	-4.81358	-4.02252	196	65.6243	-4.10431	-4.27232	555	64.6574	-3.84978	-5.40784	433	61.3536	-0.22444
PV035_Serie1	35	1	F	>55	University studies	DIESTRO	2017-05-12	60-85	158-185	<24	TRUE	MODERADO	DE PIE	TRUE	>365	G	C	2	Sporadic	FALSE	FALSE	FALSE	FALSE	FALSE	FALSE	FALSE	FALSE	1-25	TRUE	FALSE	TRUE	TRUE	1144.9	73.2033	113.492	48.8304	3.62542	-2.25618	128	44.8629	-0.719432	-6.00025	63	40.9643	2.62666	-3.36529	201	40.1629	0.518745
PV035_Serie2	35	2	F	>55	University studies	DIESTRO	2017-05-12	60-85	158-185	<24	TRUE	MODERADO	DE PIE	TRUE	>365	G	C	2	Sporadic	FALSE	FALSE	FALSE	FALSE	FALSE	FALSE	FALSE	FALSE	1-25	TRUE	FALSE	TRUE	TRUE	1237.22	78.5041	116.246	49.3314	4.12855	-1.29158	125	48.5319	2.89373	-2.2555	55	47.8632	2.77159	-0.761545	411	46.4259	4.22621
PV036_Serie1	130	1	F	30-55	University studies	DIESTRO	2017-07-14	>85	158-185	>30	FALSE	MODERADO	DE PIE	TRUE	<180	E	A	0	Frequent	FALSE	FALSE	FALSE	FALSE	FALSE	FALSE	FALSE	FALSE	26-50	FALSE	FALSE	FALSE	TRUE	1633.15	32.3013	137.81	62.8002	5.69382	-0.181054	348	62.5388	5.88605	-0.323269	117	61.7723	3.61905	-0.884904	571	61.5374	5.34775
PV036_Serie2	130	2	F	30-55	University studies	DIESTRO	2017-07-14	>85	158-185	>30	FALSE	MODERADO	DE PIE	TRUE	<180	E	A	0	Frequent	FALSE	FALSE	FALSE	FALSE	FALSE	FALSE	FALSE	FALSE	26-50	FALSE	FALSE	FALSE	TRUE	1612.97	35.6536	136.75	66.7774	2.7851	-2.53793	319	66.2555	4.89085	-0.618246	1236	65.8024	3.44756	-2.37186	695	64.917	3.77659
PV037_Serie1	131	1	F	30-55	High school	DIESTRO	2017-07-17	60-85	158-185	24-30	TRUE	LEVE	SEDENTARIO	TRUE	>365	E	C	2	Sporadic	FALSE	FALSE	FALSE	FALSE	TRUE	TRUE	FALSE	FALSE	1-25	FALSE	FALSE	FALSE	TRUE	1292.34	64.4882	116.295	60.2193	-4.54984	0.132983	576	57.505	-4.66467	-2.5283	168	56.5511	-4.23938	-1.71444	331	55.6861	-4.21042
PV037_Serie2	131	2	F	30-55	High school	DIESTRO	2017-07-17	60-85	158-185	24-30	TRUE	LEVE	SEDENTARIO	TRUE	>365	E	C	2	Sporadic	FALSE	FALSE	FALSE	FALSE	TRUE	TRUE	FALSE	FALSE	1-25	FALSE	FALSE	FALSE	TRUE	1149.75	55.813	113.676	61.7205	-5.34119	-0.999738	332	59.7078	-3.65212	0.228326	525	58.1279	-1.98596	-0.625889	432	57.839	-3.1141
PV038_Serie1	132	1	F	<30	University studies	DIESTRO	2017-07-17	60-85	158-185	24-30	TRUE	LEVE	SEDENTARIO	FALSE				2	Frequent	TRUE	FALSE	FALSE	FALSE	FALSE	FALSE	FALSE	FALSE	>50	FALSE	TRUE	TRUE	TRUE	1388.48	80.3521	133.555	71.9292	-4.66044	-4.70433	357	68.9189	-2.58386	-5.53093	436	67.7694	-2.15612	-4.21826	207	65.4917	-3.35483
PV038_Serie2	132	2	F	<30	University studies	DIESTRO	2017-07-17	60-85	158-185	24-30	TRUE	LEVE	SEDENTARIO	FALSE				2	Frequent	TRUE	FALSE	FALSE	FALSE	FALSE	FALSE	FALSE	FALSE	>50	FALSE	TRUE	TRUE	TRUE	1453.63	92.2352	130.577	73.369	-3.99994	-0.544008	180	72.2356	4.12055	-0.258668	444	71.1588	-1.45512	0.682582	311	69.6416	1.40074
PV039_Serie1	36	1	F	30-55	University studies	DIESTRO	2017-05-12	60-85	158-185	<24	TRUE	LEVE		FALSE						TRUE	FALSE	FALSE	FALSE	FALSE	FALSE	FALSE	FALSE	0	FALSE	FALSE	FALSE	FALSE	1276.7	33.5267	111.013	57.8143	-8.68156	0.814756	241	57.0395	-8.5828	1.68752	709	56.8256	-8.71944	2.07754	555	56.647	-10.2489
PV039_Serie2	36	2	F	30-55	University studies	DIESTRO	2017-05-12	60-85	158-185	<24	TRUE	LEVE		FALSE						TRUE	FALSE	FALSE	FALSE	FALSE	FALSE	FALSE	FALSE	0	FALSE	FALSE	FALSE	FALSE	1219.53	39.5437	105.81	59.513	-9.0751	3.09311	728	57.4096	-10.7953	2.59538	608	56.8307	-10.691	2.41902	487	56.3809	-10.0197
PV040_Serie1	37	1	F	>55	High school	DIESTRO	2017-05-12	>85	158-185	>30	FALSE	MODERADO	SEDENTARIO	TRUE		E	C	2	Frequent	FALSE	FALSE	FALSE	FALSE	FALSE	FALSE	FALSE	FALSE	1-25	FALSE	FALSE	FALSE	TRUE	1191.21	31.021	102.787	50.1126	-11.6775	2.76933	1044	48.5807	-10.0109	4.8343	84	48.2478	-9.93922	3.18037	720	48.0474	-9.68324
PV040_Serie2	37	2	F	>55	High school	DIESTRO	2017-05-12	>85	158-185	>30	FALSE	MODERADO	SEDENTARIO	TRUE		E	C	2	Frequent	FALSE	FALSE	FALSE	FALSE	FALSE	FALSE	FALSE	FALSE	1-25	FALSE	FALSE	FALSE	TRUE	1149.79	31.109	98.827	53.5815	-10.5572	1.44221	693	52.8692	-10.4626	3.39859	224	52.377	-10.2663	4.29573	87	51.2345	-10.8043
PV041_Serie1	41	1	F	<30	University studies	DIESTRO	2017-05-16	60-85	158-185	<24	TRUE	MODERADO	MODERADO	FALSE						FALSE	FALSE	FALSE	FALSE	FALSE	FALSE	FALSE	FALSE	0	FALSE	FALSE	FALSE	FALSE	1618.53	87.3935	139.572	63.3955	-3.41114	-1.17535	107	62.4038	0.156026	0.113463	492	61.9805	-2.12308	-0.783312	416	61.5378	-3.06113
PV041_Serie2	41	2	F	<30	University studies	DIESTRO	2017-05-16	60-85	158-185	<24	TRUE	MODERADO	MODERADO	FALSE						FALSE	FALSE	FALSE	FALSE	FALSE	FALSE	FALSE	FALSE	0	FALSE	FALSE	FALSE	FALSE	1663.12	86.441	144.306	60.8926	1.04695	1.20609	182	60.6385	0.784656	1.31957	351	59.4955	2.17837	2.34802	432	58.3383	1.47602
PV042_Serie1	42	1	M	30-55	Bachelor	DIESTRO	2017-05-16	>85	158-185	>30	TRUE	LEVE	MODERADO	FALSE						FALSE	FALSE	FALSE	FALSE	FALSE	FALSE	FALSE	FALSE	0	TRUE	FALSE	FALSE	TRUE	1081.94	73.9028	100.669	46.6144	-3.63896	2.06374	184	46.4202	-2.21725	3.28047	50	45.7315	-2.09745	2.32983	118	45.2382	-1.45938
PV042_Serie2	42	2	M	30-55	Bachelor	DIESTRO	2017-05-16	>85	158-185	>30	TRUE	LEVE	MODERADO	FALSE						FALSE	FALSE	FALSE	FALSE	FALSE	FALSE	FALSE	FALSE	0	TRUE	FALSE	FALSE	TRUE	967.739	58.1574	94.7131	43.931	-2.97778	1.35071	45	41.2649	-2.8333	0.603349	341	40.9689	-3.9775	-0.950275	416	40.1519	-3.03377
PV043_Serie1	43	1	F	>55	High school	DIESTRO	2017-05-17	<60	158-185	<24	TRUE	LEVE	SEDENTARIO	FALSE				2	Frequent	TRUE	FALSE	FALSE	FALSE	TRUE	TRUE	FALSE	FALSE	>50	FALSE	TRUE	TRUE	TRUE	667.446	20.0796	60.2251	39.0579	3.62972	-4.37763	393	38.6375	3.58028	-3.44367	925	38.5486	5.20274	-2.27839	790	37.2164	4.07072
PV043_Serie2	43	2	F	>55	High school	DIESTRO	2017-05-17	<60	158-185	<24	TRUE	LEVE	SEDENTARIO	FALSE				2	Frequent	TRUE	FALSE	FALSE	FALSE	TRUE	TRUE	FALSE	FALSE	>50	FALSE	TRUE	TRUE	TRUE	595.589	17.4967	54.3406	36.4136	2.96614	-2.98323	943	36.0944	2.34855	-3.46086	526	35.4074	3.20297	-2.81352	671	34.8814	2.5772
PV044_Serie1	44	1	F	<30	Bachelor	AMBIDIESTRO	2017-05-17	60-85	158-185	<24	FALSE	LEVE	SEDENTARIO	FALSE						FALSE	FALSE	FALSE	FALSE	FALSE	FALSE	FALSE	FALSE	1-25	FALSE	FALSE	FALSE	FALSE	1576.52	74.6456	136.025	58.9746	5.88412	-7.37823	142	58.2357	3.73479	-7.35024	498	57.432	6.53952	-8.70324	583	56.9849	5.81308
PV044_Serie2	44	2	F	<30	Bachelor	AMBIDIESTRO	2017-05-17	60-85	158-185	<24	FALSE	LEVE	SEDENTARIO	FALSE						FALSE	FALSE	FALSE	FALSE	FALSE	FALSE	FALSE	FALSE	1-25	FALSE	FALSE	FALSE	FALSE	1396.97	67.0332	133.396	56.1257	4.0409	-10.636	53	54.6425	6.15778	-4.51007	425	52.96	6.10132	-9.28899	329	52.8385	2.83014
PV045_Serie1	45	1	F	30-55	Bachelor	DIESTRO	2017-05-17	60-85	158-185	24-30	FALSE	LEVE	MODERADO	TRUE	<180	F	E	0	Frequent	TRUE	FALSE	FALSE	FALSE	TRUE	FALSE	FALSE	TRUE	>50	FALSE	TRUE	FALSE	TRUE	938.624	50.2475	87.4349	49.8149	0.310748	-6.62476	223	49.809	2.36447	-5.21515	392	49.2615	-0.649132	-9.36058	144	49.07	0.534811
PV045_Serie2	45	2	F	30-55	Bachelor	DIESTRO	2017-05-17	60-85	158-185	24-30	FALSE	LEVE	MODERADO	TRUE	<180	F	E	0	Frequent	TRUE	FALSE	FALSE	FALSE	TRUE	FALSE	FALSE	TRUE	>50	FALSE	TRUE	FALSE	TRUE	901.773	38.3407	79.6114	50.9404	5.25942	-2.24539	666	48.545	1.60167	-3.97177	386	48.1785	2.80474	-3.12594	575	47.8178	1.84823
PV046_Serie1	46	1	F	>55	University studies	DIESTRO	2017-05-19	60-85	158-185	<24	TRUE	INTENSO	SEDENTARIO	FALSE						FALSE	TRUE	FALSE	FALSE	FALSE	FALSE	FALSE	FALSE	1-25	FALSE	FALSE	FALSE	TRUE	1260.29	62.3906	109.22	59.0704	-1.0919	3.87582	413	58.7937	-0.765073	4.04194	245	58.4775	-2.44894	4.91663	501	58.426	-2.53187
PV046_Serie2	46	2	F	>55	University studies	DIESTRO	2017-05-19	60-85	158-185	<24	TRUE	INTENSO	SEDENTARIO	FALSE						FALSE	TRUE	FALSE	FALSE	FALSE	FALSE	FALSE	FALSE	1-25	FALSE	FALSE	FALSE	TRUE	1263.2	49.8893	106.682	64.6287	-6.1235	2.18372	278	64.0918	-5.80685	3.32498	360	63.2763	-5.96326	2.50633	528	63.0238	-6.7613
PV047_Serie1	47	1	M	<30	University studies	AMBIDIESTRO	2017-05-19	60-85	158-185	24-30	TRUE	INTENSO	SEDENTARIO	TRUE	<180	F	E	0	Frequent	TRUE	FALSE	FALSE	FALSE	FALSE	FALSE	FALSE	FALSE	>50	TRUE	TRUE	TRUE	TRUE	662.396	30.4971	65.5493	34.928	-5.76406	-5.15797	68	33.2441	-4.34165	-4.47422	275	32.5241	-3.83251	-3.87706	466	30.3272	-3.42064
PV047_Serie2	47	2	M	<30	University studies	AMBIDIESTRO	2017-05-19	60-85	158-185	24-30	TRUE	INTENSO	SEDENTARIO	TRUE	<180	F	E	0	Frequent	TRUE	FALSE	FALSE	FALSE	FALSE	FALSE	FALSE	FALSE	>50	TRUE	TRUE	TRUE	TRUE	598.412	35.1181	56.1054	38.6082	-3.93387	-2.49221	404	37.9254	-5.62134	-3.6742	53	36.5089	-5.09106	-2.40371	124	35.662	-4.97741
PV048_Serie1	48	1	F	30-55	University studies	DIESTRO	2017-05-19	<60	158-185	<24	TRUE	INTENSO	DE PIE	FALSE						TRUE	FALSE	FALSE	FALSE	FALSE	FALSE	FALSE	FALSE	0	FALSE	FALSE	FALSE	TRUE	1465.87	73.147	124.364	64.7307	7.04897	0.566304	64	64.5569	4.68566	-0.304566	148	64.4012	7.02257	-0.772488	235	64.2706	9.89406
PV048_Serie2	48	2	F	30-55	University studies	DIESTRO	2017-05-19	<60	158-185	<24	TRUE	INTENSO	DE PIE	FALSE						TRUE	FALSE	FALSE	FALSE	FALSE	FALSE	FALSE	FALSE	0	FALSE	FALSE	FALSE	TRUE	1426.38	82.9293	121.244	64.6342	5.61746	-0.386204	117	64.401	5.2321	-1.70751	260	64.3015	3.8054	-1.05156	45	64.0487	6.75986
PV049_Serie1	49	1	M	>55	University studies	DIESTRO	2017-05-19	60-85	158-185	24-30	TRUE	MODERADO	SEDENTARIO	FALSE						FALSE	FALSE	FALSE	FALSE	FALSE	FALSE	FALSE	FALSE	0	FALSE	FALSE	FALSE	TRUE	1087.74	16.8173	93.1889	51.42	1.84324	0.140414	1016	51.1736	1.12866	1.01723	681	51.1676	-1.02122	-2.47831	104	50.6506	-1.21238
PV049_Serie2	49	2	M	>55	University studies	DIESTRO	2017-05-19	60-85	158-185	24-30	TRUE	MODERADO	SEDENTARIO	FALSE						FALSE	FALSE	FALSE	FALSE	FALSE	FALSE	FALSE	FALSE	0	FALSE	FALSE	FALSE	TRUE	1070.07	21.4873	91.5303	50.1586	3.51554	3.22466	95	49.834	5.74673	5.2701	684	49.291	6.94802	3.73609	1340	48.922	4.59017
PV050_Serie1	50	1	F	30-55	University studies	DIESTRO	2017-05-22	60-85	158-185	<24	TRUE	MODERADO	SEDENTARIO	FALSE						FALSE	FALSE	FALSE	FALSE	FALSE	FALSE	FALSE	FALSE	0	FALSE	FALSE	FALSE	FALSE	1113.74	104.283	109.878	57.4888	0.29076	-1.166	46	53.6477	2.3653	-1.10327	192	52.8903	3.90136	1.2082	242	50.5214	7.34771
PV050_Serie2	50	2	F	30-55	University studies	DIESTRO	2017-05-22	60-85	158-185	<24	TRUE	MODERADO	SEDENTARIO	FALSE						FALSE	FALSE	FALSE	FALSE	FALSE	FALSE	FALSE	FALSE	0	FALSE	FALSE	FALSE	FALSE	1155.3	47.7396	107.077	56.8677	-7.15253	1.45495	155	56.4904	-7.36355	0.128521	264	56.4611	-4.12024	2.02006	57	56.1908	-6.38839
PV051_Serie1	51	1	M	30-55	University studies	DIESTRO	2017-05-22	>85	158-185	>30	TRUE	LEVE	SEDENTARIO	TRUE	>365					FALSE	FALSE	FALSE	FALSE	FALSE	FALSE	FALSE	FALSE	1-25	FALSE	TRUE	FALSE	FALSE	2259.34	30.7477	66.7597	24.8094	4.36324	-1.46199	923	21.6595	0.0605674	-4.37172	62	21.0679	5.28662	-1.77245	1018	20.1813	5.71611
PV051_Serie2	51	2	M	30-55	University studies	DIESTRO	2017-05-22	>85	158-185	>30	TRUE	LEVE	SEDENTARIO	TRUE	>365					FALSE	FALSE	FALSE	FALSE	FALSE	FALSE	FALSE	FALSE	1-25	FALSE	TRUE	FALSE	FALSE	753.886	29.9161	58.2232	20.6509	3.02663	-2.51392	317	20.1247	4.02139	-1.08586	49	18.3767	2.11096	-4.06678	230	16.6038	3.86042
PV052_Serie1	52	1	F	30-55	University studies	DIESTRO	2017-05-22	60-85	158-185	24-30	FALSE	LEVE	SEDENTARIO	FALSE						FALSE	FALSE	FALSE	FALSE	FALSE	FALSE	FALSE	FALSE	0	FALSE	FALSE	FALSE	FALSE	1636.62	47.1921	141.731	71.6624	1.19546	0.351778	355	71.0393	0.317367	0.600222	792	70.0483	1.24909	0.848101	507	70.0423	1.233
PV052_Serie2	52	2	F	30-55	University studies	DIESTRO	2017-05-22	60-85	158-185	24-30	FALSE	LEVE	SEDENTARIO	FALSE						FALSE	FALSE	FALSE	FALSE	FALSE	FALSE	FALSE	FALSE	0	FALSE	FALSE	FALSE	FALSE	1324.85	46.3235	132.263	60.6907	1.79875	-1.5482	282	60.2968	1.6594	-2.04607	567	59.4135	1.14339	-1.94196	420	53.1699	2.22873
PV053_Serie1	53	1	F	30-55	Bachelor	DIESTRO	2017-05-23	>85	158-185	>30	TRUE	LEVE	SEDENTARIO	TRUE	<180	F	C	1	Frequent	TRUE	FALSE	FALSE	FALSE	FALSE	FALSE	FALSE	TRUE	26-50	TRUE	TRUE	TRUE	TRUE	826.099	30.2379	72.6489	32.8015	3.34079	3.10063	268	31.769	0.269851	-0.0898484	702	31.1374	1.87846	2.80591	379	29.5125	1.21409
PV053_Serie2	53	2	F	30-55	Bachelor	DIESTRO	2017-05-23	>85	158-185	>30	TRUE	LEVE	SEDENTARIO	TRUE	<180	F	C	1	Frequent	TRUE	FALSE	FALSE	FALSE	FALSE	FALSE	FALSE	TRUE	26-50	TRUE	TRUE	TRUE	TRUE	749.839	36.6849	75.0937	32.8197	-0.262727	0.996675	553	30.8366	-0.4523	2.85994	201	30.3376	0.288121	0.602879	462	28.2593	0.909887
PV054_Serie1	54	1	F	30-55	Bachelor	DIESTRO	2017-05-23	60-85	<158	24-30	TRUE	MODERADO	DE PIE	TRUE	>365			2	Frequent	TRUE	FALSE	FALSE	FALSE	TRUE	FALSE	FALSE	FALSE	>50	TRUE	FALSE	FALSE	TRUE	1247.44	44.7433	116.381	64.1429	-5.4017	-8.0549	255	63.769	-3.89129	-7.08374	98	62.2959	-4.0174	-7.27052	519	61.8261	-5.04835
PV054_Serie2	54	2	F	30-55	Bachelor	DIESTRO	2017-05-23	60-85	<158	24-30	TRUE	MODERADO	DE PIE	TRUE	>365			2	Frequent	TRUE	FALSE	FALSE	FALSE	TRUE	FALSE	FALSE	FALSE	>50	TRUE	FALSE	FALSE	TRUE	1179.22	48.8899	111.836	64.1348	-0.475053	-4.29605	76	62.6151	-1.62117	-5.75457	193	61.947	-1.12811	-7.62024	306	61.1823	-0.349899
PV055_Serie1	55	1	F	<30	Bachelor	AMBIDIESTRO	2017-05-23	60-85	158-185	<24	FALSE	LEVE		TRUE	<180	H	A			TRUE	FALSE	FALSE	FALSE	FALSE	FALSE	FALSE	FALSE	1-25	TRUE	FALSE	FALSE	TRUE	1580.2	68.1121	130.664	64.3238	0.15353	-2.73089	561	62.4713	1.82462	0.728677	395	62.3165	3.28573	-0.624833	480	60.4985	2.34238
PV055_Serie2	55	2	F	<30	Bachelor	AMBIDIESTRO	2017-05-23	60-85	158-185	<24	FALSE	LEVE		TRUE	<180	H	A			TRUE	FALSE	FALSE	FALSE	FALSE	FALSE	FALSE	FALSE	1-25	TRUE	FALSE	FALSE	TRUE	1229.71	58.6693	108.427	58.8887	-0.692798	-1.9095	321	58.6419	-0.151396	-2.31281	575	57.6935	2.35839	-1.31783	51	54.3236	-2.18431
PV056_Serie1	56	1	F	30-55	University studies	DIESTRO	2017-05-24	60-85	158-185	24-30	FALSE	LEVE	SEDENTARIO	FALSE				2	Frequent	TRUE	FALSE	FALSE	FALSE	FALSE	FALSE	FALSE	TRUE	>50	FALSE	FALSE	TRUE	TRUE	1174.89	51.6207	101.323	43.802	1.94357	-2.59856	631	43.3982	2.3417	-3.50791	544	42.6413	2.35612	-2.88352	448	42.0116	2.33767
PV056_Serie2	56	2	F	30-55	University studies	DIESTRO	2017-05-24	60-85	158-185	24-30	FALSE	LEVE	SEDENTARIO	FALSE				2	Frequent	TRUE	FALSE	FALSE	FALSE	FALSE	FALSE	FALSE	TRUE	>50	FALSE	FALSE	TRUE	TRUE	1138.64	58.2128	96.694	43.5069	1.11006	-2.79846	465	43.305	1.78418	-2.95531	305	43.2559	2.32475	-2.21077	225	42.898	1.15823
PV057_Serie1	57	1	M	30-55	Bachelor	DIESTRO	2017-05-26	60-85	158-185	24-30	FALSE	LEVE	SEDENTARIO	FALSE				0	Sporadic	FALSE	FALSE	FALSE	FALSE	FALSE	FALSE	FALSE	FALSE	1-25	FALSE	FALSE	FALSE	TRUE	1057.03	40.7178	93.0804	61.0268	5.31824	-0.710934	59	60.3101	3.5889	0.196093	168	60.0233	5.49976	1.18116	284	59.7858	1.8851
PV057_Serie2	57	2	M	30-55	Bachelor	DIESTRO	2017-05-26	60-85	158-185	24-30	FALSE	LEVE	SEDENTARIO	FALSE				0	Sporadic	FALSE	FALSE	FALSE	FALSE	FALSE	FALSE	FALSE	FALSE	1-25	FALSE	FALSE	FALSE	TRUE	985.642	27.843	88.8488	56.1785	-4.88587	-2.28103	81	53.6177	-4.55881	-1.85896	966	52.0047	-3.59242	-1.7966	246	51.7942	-6.9599
PV058_Serie1	58	1	M	30-55	University studies	DIESTRO	2017-05-26	60-85	158-185	<24	TRUE	INTENSO	SEDENTARIO	FALSE						FALSE	FALSE	FALSE	FALSE	FALSE	FALSE	FALSE	FALSE	0	FALSE	FALSE	FALSE	FALSE	1487.28	78.9428	127.413	71.1714	8.65869	-3.46305	125	71.1713	11.539	-3.67849	202	70.2161	8.37355	-4.47493	284	69.5671	12.0521
PV058_Serie2	58	2	M	30-55	University studies	DIESTRO	2017-05-26	60-85	158-185	<24	TRUE	INTENSO	SEDENTARIO	FALSE						FALSE	FALSE	FALSE	FALSE	FALSE	FALSE	FALSE	FALSE	0	FALSE	FALSE	FALSE	FALSE	1155.43	73.5009	124.876	72.1396	5.49356	-5.0493	223	71.7586	7.37729	-3.44321	381	71.0694	4.24334	-2.64248	51	70.9219	4.62429
PV059_Serie1	59	1	M	30-55	University studies	DIESTRO	2017-05-26	60-85	158-185	24-30	TRUE	MODERADO	DE PIE	FALSE						FALSE	FALSE	FALSE	FALSE	FALSE	FALSE	FALSE	FALSE	1-25	TRUE	FALSE	FALSE	FALSE	1317.83	92.5444	123.195	53.3384	1.3338	-0.213614	369	52.8963	1.74457	0.154528	308	52.6243	0.874862	0.0896544	247	52.2497	0.74523
PV059_Serie2	59	2	M	30-55	University studies	DIESTRO	2017-05-26	60-85	158-185	24-30	TRUE	MODERADO	DE PIE	FALSE						FALSE	FALSE	FALSE	FALSE	FALSE	FALSE	FALSE	FALSE	1-25	TRUE	FALSE	FALSE	FALSE	1269.58	120.683	124.148	51.1398	-3.05976	-3.73059	197	51.0091	0.145869	-2.12859	102	49.8337	-0.682019	-2.53202	244	49.3591	-1.32852
PV060_Serie1	60	1	F	30-55	University studies	DIESTRO	2017-05-26	60-85	<158	24-30	TRUE	MODERADO	SEDENTARIO	FALSE				2	Discontinuous	TRUE	FALSE	FALSE	FALSE	FALSE	FALSE	FALSE	FALSE	26-50	TRUE	TRUE	TRUE	TRUE	1252.09	76.1612	116.476	67.7332	5.39674	-0.93892	354	67.4641	-2.26644	-2.64554	129	67.0218	0.864465	-1.63931	285	66.9247	1.35726
PV060_Serie2	60	2	F	30-55	University studies	DIESTRO	2017-05-26	60-85	<158	24-30	TRUE	MODERADO	SEDENTARIO	FALSE				2	Discontinuous	TRUE	FALSE	FALSE	FALSE	FALSE	FALSE	FALSE	FALSE	26-50	TRUE	TRUE	TRUE	TRUE	1228.48	88.507	114.986	67.5959	-2.23211	-3.67789	363	65.6253	-3.62681	-1.67805	115	64.7826	-1.91162	-4.48422	183	64.6703	-3.66964
PV061_Serie1	61	1	F	30-55	University studies	DIESTRO	2017-05-26	<60	<158	<24	TRUE	MODERADO	SEDENTARIO	FALSE						FALSE	FALSE	FALSE	FALSE	FALSE	FALSE	FALSE	FALSE	1-25	FALSE	FALSE	FALSE	FALSE	1602.31	68.1255	135.644	70.4883	1.89728	-1.51118	669	70.0097	1.15473	-1.79174	387	69.9246	1.73429	-1.17028	575	69.8983	1.23558
PV061_Serie2	61	2	F	30-55	University studies	DIESTRO	2017-05-26	<60	<158	<24	TRUE	MODERADO	SEDENTARIO	FALSE						FALSE	FALSE	FALSE	FALSE	FALSE	FALSE	FALSE	FALSE	1-25	FALSE	FALSE	FALSE	FALSE	1441.89	59.1907	133.375	72.1616	2.13252	0.713128	318	71.9457	3.43795	0.688882	200	71.0657	3.38502	2.05639	639	70.4399	1.09325
PV062_Serie1	62	1	F	>55	Bachelor	DIESTRO	2017-05-29	<60	158-185	<24	TRUE	MODERADO	SEDENTARIO	FALSE				2	Sporadic	FALSE	FALSE	FALSE	FALSE	FALSE	FALSE	FALSE	FALSE	1-25	FALSE	FALSE	FALSE	TRUE	1144.12	73.5297	107.705	52.0128	-0.343832	-0.033983	117	50.6972	1.59647	0.61053	260	50.3996	3.33485	2.62165	332	49.664	-0.726676
PV062_Serie2	62	2	F	>55	Bachelor	DIESTRO	2017-05-29	<60	158-185	<24	TRUE	MODERADO	SEDENTARIO	FALSE				2	Sporadic	FALSE	FALSE	FALSE	FALSE	FALSE	FALSE	FALSE	FALSE	1-25	FALSE	FALSE	FALSE	TRUE	1125.69	64.5463	104.712	49.0877	0.0576903	0.498396	288	48.563	0.266663	2.27798	445	48.1721	-1.46667	0.369199	206	48.0617	-2.29092
PV063_Serie1	63	1	F	30-55	High school	DIESTRO	2017-05-29	<60	158-185	<24	TRUE	LEVE	SEDENTARIO	FALSE				2	Frequent	FALSE	FALSE	FALSE	FALSE	FALSE	FALSE	FALSE	TRUE	1-25	TRUE	TRUE	FALSE	TRUE	1084.74	50.4063	101.888	54.8826	0.334258	4.45173	544	54.5333	-3.41535	0.463816	260	54.2666	0.534971	4.05885	456	53.3845	-1.34942
PV063_Serie2	63	2	F	30-55	High school	DIESTRO	2017-05-29	<60	158-185	<24	TRUE	LEVE	SEDENTARIO	FALSE				2	Frequent	FALSE	FALSE	FALSE	FALSE	FALSE	FALSE	FALSE	TRUE	1-25	TRUE	TRUE	FALSE	TRUE	1031.33	60.2414	99.2735	51.126	-1.4516	2.19931	300	51.1166	0.15764	2.36831	375	50.9598	-2.9917	1.66968	454	50.1869	-3.89427
PV064_Serie1	64	1	F	>55	University studies	DIESTRO	2017-05-29	60-85	158-185	<24	TRUE	INTENSO	SEDENTARIO	FALSE				2	Sporadic	FALSE	FALSE	TRUE	FALSE	FALSE	FALSE	FALSE	FALSE	0	FALSE	FALSE	FALSE	FALSE	1272.65	38.7531	108.54	53.1435	-6.28904	-0.330764	72	52.9659	-8.17817	-0.540234	604	52.3631	-8.17091	-1.58194	194	52.2819	-7.74837
PV064_Serie2	64	2	F	>55	University studies	DIESTRO	2017-05-29	60-85	158-185	<24	TRUE	INTENSO	SEDENTARIO	FALSE				2	Sporadic	FALSE	FALSE	TRUE	FALSE	FALSE	FALSE	FALSE	FALSE	0	FALSE	FALSE	FALSE	FALSE	1141.6	52.4633	105.616	48.1174	-5.35545	-2.83221	151	47.4971	-3.67235	-3.15199	558	47.4309	-2.93661	-1.63325	248	47.4138	-3.71479
PV065_Serie1	65	1	F	>55	High school	DIESTRO	2017-05-29	60-85	<158	24-30	TRUE	MODERADO	MODERADO	FALSE						FALSE	FALSE	FALSE	FALSE	FALSE	FALSE	FALSE	FALSE	0	FALSE	FALSE	FALSE	FALSE	1149.11	65.1425	107.637	55.8425	-0.255066	1.58121	228	55.6918	0.192953	1.60532	467	55.536	1.08917	2.56821	144	55.0812	1.87282
PV065_Serie2	65	2	F	>55	High school	DIESTRO	2017-05-29	60-85	<158	24-30	TRUE	MODERADO	MODERADO	FALSE						FALSE	FALSE	FALSE	FALSE	FALSE	FALSE	FALSE	FALSE	0	FALSE	FALSE	FALSE	FALSE	1120.45	67.3346	105.852	59.0495	-2.70248	2.07991	221	58.3826	-1.77895	2.27791	142	58.2174	-2.28722	2.97703	66	56.0394	-1.94406
PV066_Serie1	66	1	M	30-55	Bachelor	DIESTRO	2017-05-30	60-85	158-185	<24	TRUE	LEVE	DE PIE	FALSE						FALSE	FALSE	FALSE	FALSE	FALSE	FALSE	FALSE	FALSE	0	TRUE	FALSE	FALSE	FALSE	1232.4	72.1544	106.936	58.0906	5.96045	2.52841	360	56.4328	6.61987	2.49924	429	55.9098	5.95892	1.82584	283	55.0653	5.43182
PV066_Serie2	66	2	M	30-55	Bachelor	DIESTRO	2017-05-30	60-85	158-185	<24	TRUE	LEVE	DE PIE	FALSE						FALSE	FALSE	FALSE	FALSE	FALSE	FALSE	FALSE	FALSE	0	TRUE	FALSE	FALSE	FALSE	1113.58	98.0261	105.362	56.1071	4.89153	-0.973538	210	55.2525	6.49357	-0.386724	311	55.0783	5.71991	0.365343	259	54.9582	8.06052
PV068_Serie1	68	1	F	30-55	University studies	DIESTRO	2017-05-30	60-85	158-185	<24	TRUE	MODERADO		FALSE				2	Frequent	FALSE	FALSE	FALSE	FALSE	FALSE	FALSE	FALSE	FALSE	1-25	FALSE	FALSE	FALSE	TRUE	1276.49	56.6827	118.625	59.6162	-5.42959	2.28017	587	58.0482	-6.41211	0.464713	387	58.0329	-6.0936	1.04324	488	57.9688	-11.5839
PV068_Serie2	68	2	F	30-55	University studies	DIESTRO	2017-05-30	60-85	158-185	<24	TRUE	MODERADO		FALSE				2	Frequent	FALSE	FALSE	FALSE	FALSE	FALSE	FALSE	FALSE	FALSE	1-25	FALSE	FALSE	FALSE	TRUE	1418.37	65.4228	120.843	62.0183	-9.93364	-0.916968	245	61.8792	-12.5167	-1.97821	151	61.7075	-11.2045	-0.131221	61	61.6526	-4.5034
PV069_Serie1	69	1	F	<30	University studies	DIESTRO	2017-05-30	60-85	158-185	<24	TRUE	INTENSO	SEDENTARIO	FALSE				2	Frequent	FALSE	FALSE	FALSE	FALSE	FALSE	FALSE	FALSE	FALSE	1-25	TRUE	FALSE	FALSE	TRUE	1600.58	48.0367	135.938	60.9998	-0.17218	-1.58769	368	60.7746	0.144206	-0.538038	222	60.1677	1.33903	0.311847	911	58.9768	2.25545
PV069_Serie2	69	2	F	<30	University studies	DIESTRO	2017-05-30	60-85	158-185	<24	TRUE	INTENSO	SEDENTARIO	FALSE				2	Frequent	FALSE	FALSE	FALSE	FALSE	FALSE	FALSE	FALSE	FALSE	1-25	TRUE	FALSE	FALSE	TRUE	1616.36	51.4109	139.033	64.5529	1.63081	-0.0389685	334	63.8555	0.970594	0.0308957	199	63.5686	2.9112	-0.0348059	608	63.108	1.00133
PV070_Serie1	70	1	M	>55	University studies	DIESTRO	2017-06-02	>85	158-185	>30	FALSE	LEVE	SEDENTARIO	FALSE				2	Frequent	FALSE	FALSE	TRUE	FALSE	FALSE	FALSE	FALSE	FALSE	0	TRUE	FALSE	FALSE	TRUE	991.48	47.3939	85.7823	52.1073	0.536894	0.199005	303	51.4169	-1.08415	-1.31152	387	51.2366	0.725838	-1.45471	134	50.9225	-0.712113
PV070_Serie2	70	2	M	>55	University studies	DIESTRO	2017-06-02	>85	158-185	>30	FALSE	LEVE	SEDENTARIO	FALSE				2	Frequent	FALSE	FALSE	TRUE	FALSE	FALSE	FALSE	FALSE	FALSE	0	TRUE	FALSE	FALSE	TRUE	976.71	42.6884	85.8287	53.0941	1.04484	0.607563	331	52.6737	3.08889	2.41103	144	52.5156	2.3144	1.23326	240	52.5155	1.8688
PV071_Serie1	71	1	F	30-55	High school	DIESTRO	2017-06-02	60-85	158-185	24-30	FALSE	LEVE	MUY PESADO	TRUE	<180	C	C	1	Frequent	FALSE	FALSE	FALSE	FALSE	FALSE	FALSE	FALSE	FALSE	>50	TRUE	TRUE	TRUE	TRUE	1128.11	38.319	96.0529	47.5083	-2.91823	-1.94317	602	47.429	-2.21534	-2.58842	358	46.9323	-1.55641	-3.10661	219	46.6761	-2.84542
PV071_Serie2	71	2	F	30-55	High school	DIESTRO	2017-06-02	60-85	158-185	24-30	FALSE	LEVE	MUY PESADO	TRUE	<180	C	C	1	Frequent	FALSE	FALSE	FALSE	FALSE	FALSE	FALSE	FALSE	FALSE	>50	TRUE	TRUE	TRUE	TRUE	1081.29	42.1061	92.389	47.1401	-1.34014	-1.62946	387	46.7073	-0.63776	0.038174	177	46.4819	-1.82914	0.378751	716	46.3751	-2.2191
PV072_Serie1	72	1	F	30-55	Bachelor	DIESTRO	2017-06-02	60-85	158-185	<24	TRUE	MODERADO	MUY PESADO	FALSE				2	Frequent	TRUE	FALSE	FALSE	FALSE	FALSE	FALSE	FALSE	TRUE	1-25	TRUE	FALSE	FALSE	TRUE	1130.68	73.8042	108.28	47.1499	-5.50736	-3.0458	45	45.1172	-2.0749	-3.18943	111	44.4931	-3.4685	-1.43453	388	44.2619	-3.39333
PV072_Serie2	72	2	F	30-55	Bachelor	DIESTRO	2017-06-02	60-85	158-185	<24	TRUE	MODERADO	MUY PESADO	FALSE				2	Frequent	TRUE	FALSE	FALSE	FALSE	FALSE	FALSE	FALSE	TRUE	1-25	TRUE	FALSE	FALSE	TRUE	1089.13	80.0833	106.026	54.4	-6.44433	-4.87933	52	53.0895	-3.13894	-3.6065	233	52.181	-4.51319	-3.90948	174	52.1363	-5.56646
PV073_Serie1	73	1	M	30-55	Bachelor	DIESTRO	2017-06-02	60-85	158-185	<24	FALSE	LEVE	DE PIE	FALSE						TRUE	FALSE	FALSE	FALSE	FALSE	FALSE	FALSE	FALSE	0	FALSE	FALSE	FALSE	FALSE	1549.57	93.7995	134.49	65.5699	-2.77008	-0.79775	393	64.9435	-1.30014	-0.495177	464	63.1402	-3.24558	-0.487014	252	63.0976	-2.4958
PV073_Serie2	73	2	M	30-55	Bachelor	DIESTRO	2017-06-02	60-85	158-185	<24	FALSE	LEVE	DE PIE	FALSE						TRUE	FALSE	FALSE	FALSE	FALSE	FALSE	FALSE	FALSE	0	FALSE	FALSE	FALSE	FALSE	1369.05	88.4397	128.985	63.2937	3.19205	0.614993	394	63.0974	1.16321	1.0839	320	61.9105	0.492916	0.428374	43	61.143	1.90047
PV074_Serie1	74	1	F	>55	University studies	DIESTRO	2017-06-05	<60	158-185	<24	TRUE	LEVE	SEDENTARIO	FALSE				0	Sporadic	FALSE	FALSE	FALSE	FALSE	FALSE	FALSE	FALSE	FALSE	1-25	FALSE	FALSE	TRUE	TRUE	989.452	25.4489	88.7634	52.328	0.386908	-1.43824	606	50.8103	0.413691	-1.46597	90	50.7573	2.06722	-0.564066	280	48.6433	1.89853
PV074_Serie2	74	2	F	>55	University studies	DIESTRO	2017-06-05	<60	158-185	<24	TRUE	LEVE	SEDENTARIO	FALSE				0	Sporadic	FALSE	FALSE	FALSE	FALSE	FALSE	FALSE	FALSE	FALSE	1-25	FALSE	FALSE	TRUE	TRUE	956.708	29.1679	83.9734	50.9945	2.96221	-0.755708	509	50.4465	2.67441	-1.17475	89	47.8771	3.36261	-1.99989	373	47.1943	4.33188
PV075_Serie1	75	1	F	30-55	University studies	DIESTRO	2017-06-05	60-85	158-185	<24	TRUE	LEVE	MODERADO	FALSE				2	Discontinuous	TRUE	FALSE	FALSE	FALSE	TRUE	FALSE	FALSE	TRUE	26-50	FALSE	TRUE	FALSE	TRUE	1196.1	57.9504	114.077	54.7926	-4.2306	-2.96697	537	52.8569	-4.16938	-3.79872	256	52.7657	-3.00813	-3.77973	161	52.2371	-4.62325
PV075_Serie2	75	2	F	30-55	University studies	DIESTRO	2017-06-05	60-85	158-185	<24	TRUE	LEVE	MODERADO	FALSE				2	Discontinuous	TRUE	FALSE	FALSE	FALSE	TRUE	FALSE	FALSE	TRUE	26-50	FALSE	TRUE	FALSE	TRUE	1146.5	70.2515	108.938	57.8489	-0.991698	-2.00728	300	57.6494	-1.25665	-3.25269	446	56.5745	-0.294946	-2.77974	373	55.9309	-0.00318796
PV076_Serie1	76	1	F	30-55	University studies	DIESTRO	2017-06-06	<60	158-185	<24	TRUE	MODERADO	DE PIE	FALSE						FALSE	FALSE	FALSE	FALSE	FALSE	FALSE	FALSE	FALSE	0	FALSE	FALSE	FALSE	TRUE	1258.36	29.7625	106.765	50.3713	-4.72227	-2.82094	1141	49.8149	-5.75114	-3.69872	789	49.8039	-4.04151	-2.07918	609	49.677	-5.54223
PV076_Serie2	76	2	F	30-55	University studies	DIESTRO	2017-06-06	<60	158-185	<24	TRUE	MODERADO	DE PIE	FALSE						FALSE	FALSE	FALSE	FALSE	FALSE	FALSE	FALSE	FALSE	0	FALSE	FALSE	FALSE	TRUE	1250.14	28.885	106.35	51.3721	-5.93771	-6.86653	604	51.1185	-5.07375	-5.20585	428	50.7736	-4.50896	-5.82242	785	50.7212	-6.39045
PV077_Serie1	14	1	M	<30	University studies	DIESTRO	2017-05-28	60-85	158-185	<24	TRUE	LEVE	SEDENTARIO	TRUE	<180	E	C	0		TRUE	FALSE	FALSE	FALSE	FALSE	FALSE	FALSE	FALSE	26-50	FALSE	FALSE	TRUE	TRUE	1080.52	30.7666	91.8565	50.1907	4.8051	1.64171	427	50.161	4.16191	0.265681	968	49.6848	3.73842	0.903183	268	49.1724	4.4868
PV077_Serie2	14	2	M	<30	University studies	DIESTRO	2017-05-28	60-85	158-185	<24	TRUE	LEVE	SEDENTARIO	TRUE	<180	E	C	0		TRUE	FALSE	FALSE	FALSE	FALSE	FALSE	FALSE	FALSE	26-50	FALSE	FALSE	TRUE	TRUE	1116.69	30.1157	94.6714	47.0649	5.45855	2.06551	722	47.0526	4.95543	2.17855	568	46.6413	7.49921	1.13773	1014	46.3489	6.31024
PV078_Serie1	77	1	M	>55	University studies	DIESTRO	2017-06-06	>85	158-185	>30	FALSE	MODERADO	DE PIE	FALSE				2	Frequent	TRUE	FALSE	FALSE	FALSE	FALSE	FALSE	FALSE	FALSE	1-25	FALSE	TRUE	FALSE	TRUE	1109.29	73.1723	105.356	52.1566	0.617655	-3.54606	352	51.3933	2.24014	-2.97955	285	51.1822	-0.108056	-2.53508	141	50.5295	0.808737
PV078_Serie2	77	2	M	>55	University studies	DIESTRO	2017-06-06	>85	158-185	>30	FALSE	MODERADO	DE PIE	FALSE				2	Frequent	TRUE	FALSE	FALSE	FALSE	FALSE	FALSE	FALSE	FALSE	1-25	FALSE	TRUE	FALSE	TRUE	1093.57	66.1966	101.571	59.0789	-3.29227	-4.9249	52	59.0499	-0.869878	-5.33027	214	58.3964	-2.37145	-4.17268	437	58.1832	-0.0856269
PV079_Serie1	78	1	F	30-55	Bachelor	DIESTRO	2017-06-06	60-85	<158	24-30	TRUE	MODERADO	SEDENTARIO	FALSE						FALSE	FALSE	FALSE	FALSE	FALSE	FALSE	FALSE	FALSE	0	FALSE	FALSE	FALSE	TRUE	1176.27	35.9935	101.424	59.2469	3.88493	-1.01613	245	58.7624	2.44635	-3.31442	78	58.111	9.38083	0.954908	392	57.057	3.96732
PV079_Serie2	78	2	F	30-55	Bachelor	DIESTRO	2017-06-06	60-85	<158	24-30	TRUE	MODERADO	SEDENTARIO	FALSE						FALSE	FALSE	FALSE	FALSE	FALSE	FALSE	FALSE	FALSE	0	FALSE	FALSE	FALSE	TRUE	1187.4	45.3897	102.195	65.5256	2.92017	-0.954203	177	65.3199	2.14029	-1.27363	293	63.955	1.47935	-2.44287	61	63.3734	2.3195
PV080_Serie1	79	1	F	30-55	Bachelor	DIESTRO	2017-06-06	<60	158-185	<24	TRUE	INTENSO	DE PIE	TRUE	<180					TRUE	FALSE	FALSE	FALSE	FALSE	FALSE	FALSE	FALSE	1-25	FALSE	FALSE	FALSE	TRUE	1552.22	67.8419	133.636	63.8508	-1.20227	1.09698	623	63.3097	-0.988529	0.729185	139	62.9259	-2.11636	0.568609	337	62.7371	-1.78364
PV080_Serie2	79	2	F	30-55	Bachelor	DIESTRO	2017-06-06	<60	158-185	<24	TRUE	INTENSO	DE PIE	TRUE	<180					TRUE	FALSE	FALSE	FALSE	FALSE	FALSE	FALSE	FALSE	1-25	FALSE	FALSE	FALSE	TRUE	1362.86	89.4267	128.385	58.6495	-6.62532	-2.79333	116	58.539	-4.92649	-1.78213	185	57.8654	-5.16139	-1.32758	256	57.6491	-3.06352
PV081_Serie1	81	1	F	>55	High school	DIESTRO	2017-06-07	60-85	158-185	24-30	TRUE	MODERADO	MODERADO	FALSE				1	Frequent	FALSE	FALSE	FALSE	FALSE	FALSE	FALSE	FALSE	FALSE	1-25	FALSE	FALSE	FALSE	TRUE	1077.32	29.6947	93.7433	50.5962	-6.13736	-8.00341	226	49.7896	-4.88888	-7.68805	979	49.6385	-5.07793	-7.78998	536	49.547	-5.84457
PV081_Serie2	81	2	F	>55	High school	DIESTRO	2017-06-07	60-85	158-185	24-30	TRUE	MODERADO	MODERADO	FALSE				1	Frequent	FALSE	FALSE	FALSE	FALSE	FALSE	FALSE	FALSE	FALSE	1-25	FALSE	FALSE	FALSE	TRUE	1043.22	31.2717	91.0157	54.9936	-2.57238	-4.7991	209	54.4926	-3.43448	-4.27034	494	53.8512	-2.61493	-4.12256	631	52.9734	-2.38573
PV082_Serie1	82	1	M	>55	Bachelor	DIESTRO	2017-06-07	60-85	158-185	<24	TRUE	LEVE		FALSE				0		TRUE	FALSE	FALSE	FALSE	TRUE	FALSE	FALSE	TRUE	26-50	FALSE	FALSE	TRUE	TRUE	1148.55	20.8979	98.2441	53.9094	1.81399	-2.52827	1469	53.0463	0.829454	-4.94063	1226	52.9466	1.43337	-2.53817	760	52.9418	2.88241
PV082_Serie2	82	2	M	>55	Bachelor	DIESTRO	2017-06-07	60-85	158-185	<24	TRUE	LEVE		FALSE				0		TRUE	FALSE	FALSE	FALSE	TRUE	FALSE	FALSE	TRUE	26-50	FALSE	FALSE	TRUE	TRUE	1139.13	17.6227	98.6123	56.7951	2.0433	-4.30054	1714	56.6467	0.731643	-4.38528	1428	55.0284	1.39985	-2.7006	863	54.5911	-0.83486
PV083_Serie1	83	1	M	<30	University studies	AMBIDIESTRO	2017-06-07	60-85	158-185	<24	FALSE	LEVE	SEDENTARIO	TRUE	<180	H	A	0		FALSE	FALSE	FALSE	FALSE	FALSE	FALSE	FALSE	FALSE	26-50	FALSE	FALSE	TRUE	TRUE	1482.18	21.0656	130.508	69.6725	4.02033	-1.71284	102	68.4114	1.58688	-1.69075	1542	68.2821	1.74347	-0.897974	1861	68.0808	2.54864
PV083_Serie2	83	2	M	<30	University studies	AMBIDIESTRO	2017-06-07	60-85	158-185	<24	FALSE	LEVE	SEDENTARIO	TRUE	<180	H	A	0		FALSE	FALSE	FALSE	FALSE	FALSE	FALSE	FALSE	FALSE	26-50	FALSE	FALSE	TRUE	TRUE	1343.43	23.2428	118.471	56.2151	4.31177	-3.95399	1074	55.9448	3.79991	-3.15712	99	55.2933	3.07961	-4.61757	1544	54.1435	4.28794
PV084_Serie1	84	1	M	30-55	University studies	ZURDO	2017-06-09	60-85	158-185	24-30	FALSE	LEVE	SEDENTARIO	FALSE						FALSE	FALSE	FALSE	FALSE	FALSE	FALSE	FALSE	FALSE	0	FALSE	FALSE	FALSE	TRUE	1085.67	52.0957	93.9488	56.0162	-1.55143	-1.02327	54	55.0794	2.08059	-0.85091	409	54.9713	1.59656	-1.33781	319	54.9039	0.589896
PV084_Serie2	84	2	M	30-55	University studies	ZURDO	2017-06-09	60-85	158-185	24-30	FALSE	LEVE	SEDENTARIO	FALSE						FALSE	FALSE	FALSE	FALSE	FALSE	FALSE	FALSE	FALSE	0	FALSE	FALSE	FALSE	TRUE	1095.26	65.8211	96.2899	58.5086	2.63405	0.0052536	362	57.4565	1.88299	0.582965	82	57.0163	0.878737	-2.27487	432	55.2325	2.74226
PV085_Serie1	85	1	M	>55	University studies	DIESTRO	2017-06-09	>85	158-185	>30	TRUE	MODERADO	SEDENTARIO	TRUE	>365	E	C			FALSE	FALSE	FALSE	TRUE	FALSE	FALSE	FALSE	FALSE	0	FALSE	FALSE	FALSE	TRUE	936.126	45.355	85.4969	52.061	3.67873	-2.89055	137	50.5838	2.06162	-2.50521	54	47.2914	5.09173	0.98156	319	47.251	4.52304
PV085_Serie2	85	2	M	>55	University studies	DIESTRO	2017-06-09	>85	158-185	>30	TRUE	MODERADO	SEDENTARIO	TRUE	>365	E	C			FALSE	FALSE	FALSE	TRUE	FALSE	FALSE	FALSE	FALSE	0	FALSE	FALSE	FALSE	TRUE	853.622	48.7227	81.096	46.9904	-0.415522	1.46603	219	46.1331	1.29246	-1.00299	55	44.9731	2.31901	2.09575	300	44.9222	1.83546
PV086_Serie1	86	1	F	<30	University studies	DIESTRO	2017-06-12	<60	158-185	<24	FALSE	LEVE	SEDENTARIO	TRUE	<180	F	C	0	Frequent	FALSE	FALSE	FALSE	FALSE	FALSE	FALSE	FALSE	FALSE	26-50	TRUE	TRUE	FALSE	TRUE	1113.91	57.5369	107.636	54.7727	-3.49905	6.1405	329	54.211	-4.34497	1.89408	408	53.9919	-5.3657	-2.16677	143	52.0197	-2.04753
PV086_Serie2	86	2	F	<30	University studies	DIESTRO	2017-06-12	<60	158-185	<24	FALSE	LEVE	SEDENTARIO	TRUE	<180	F	C	0	Frequent	FALSE	FALSE	FALSE	FALSE	FALSE	FALSE	FALSE	FALSE	26-50	TRUE	TRUE	FALSE	TRUE	1043.04	52.1521	102.908	49.2769	-5.97634	-0.0590911	250	48.5483	-6.88303	0.210833	422	48.1667	-6.10652	0.560628	337	47.2055	-3.70478
PV087_Serie1	87	1	M	<30	University studies	DIESTRO	2017-06-12	60-85	158-185	<24	TRUE	MODERADO	SEDENTARIO	FALSE						FALSE	FALSE	FALSE	FALSE	FALSE	FALSE	FALSE	FALSE	0	FALSE	FALSE	FALSE	FALSE	1297.45	59.19	120.324	56.7793	1.29771	-2.70637	61	56.3337	2.75608	-0.849277	260	56.0728	2.98003	-1.08609	367	55.9991	2.30207
PV087_Serie2	87	2	M	<30	University studies	DIESTRO	2017-06-12	60-85	158-185	<24	TRUE	MODERADO	SEDENTARIO	FALSE						FALSE	FALSE	FALSE	FALSE	FALSE	FALSE	FALSE	FALSE	0	FALSE	FALSE	FALSE	FALSE	1420.56	78.2246	120.38	57.6404	3.14011	-2.43681	390	57.4226	3.69925	-3.591	318	56.7436	1.29363	-2.48268	241	56.7068	0.0366821
PV088_Serie1	88	1	F	30-55	University studies	DIESTRO	2017-06-12	60-85	158-185	<24	FALSE	LEVE	SEDENTARIO	FALSE				2	Frequent	FALSE	FALSE	FALSE	FALSE	FALSE	FALSE	FALSE	FALSE	1-25	TRUE	TRUE	FALSE	TRUE	1515.18	46.997	135.497	57.5994	-4.54126	-7.45793	210	57.1038	-3.86587	-4.4105	354	56.2527	-2.62034	-4.27627	745	55.7948	-1.19024
PV088_Serie2	88	2	F	30-55	University studies	DIESTRO	2017-06-12	60-85	158-185	<24	FALSE	LEVE	SEDENTARIO	FALSE				2	Frequent	FALSE	FALSE	FALSE	FALSE	FALSE	FALSE	FALSE	FALSE	1-25	TRUE	TRUE	FALSE	TRUE	1381.39	42.2701	124.25	59.719	-6.80315	-6.6603	880	57.9653	-5.94537	-7.30091	463	57.7566	-6.60216	-7.26319	326	57.593	-6.59376
PV089_Serie1	89	1	M	30-55	University studies	DIESTRO	2017-06-12	>85	>185	24-30	TRUE	INTENSO	MODERADO	FALSE				2	Sporadic	FALSE	FALSE	FALSE	FALSE	FALSE	FALSE	FALSE	FALSE	1-25	FALSE	FALSE	TRUE	TRUE	1510.84	46.8041	120.209	60.2254	-0.619332	1.0244	396	60.0129	-0.705119	-0.0959396	531	59.7501	0.406137	1.863	653	59.2995	-2.24351
PV089_Serie2	89	2	M	30-55	University studies	DIESTRO	2017-06-12	>85	>185	24-30	TRUE	INTENSO	MODERADO	FALSE				2	Sporadic	FALSE	FALSE	FALSE	FALSE	FALSE	FALSE	FALSE	FALSE	1-25	FALSE	FALSE	TRUE	TRUE	1312.27	46.6005	113.031	58.1536	-0.880651	-1.52479	177	57.7485	-1.21864	1.86829	533	57.1032	0.949741	1.5308	414	56.4015	-1.14811
PV090_Serie1	90	1	M	30-55	University studies	DIESTRO	2017-06-13	60-85	158-185	24-30	TRUE	INTENSO	SEDENTARIO	FALSE						FALSE	FALSE	FALSE	FALSE	FALSE	FALSE	TRUE	FALSE	0	TRUE	FALSE	FALSE	TRUE	1115.12	26.152	96.8882	49.9658	0.797518	-2.91258	318	48.6738	1.55484	-2.81296	105	48.2696	1.62409	-1.96084	1001	47.9125	0.77486
PV090_Serie2	90	2	M	30-55	University studies	DIESTRO	2017-06-13	60-85	158-185	24-30	TRUE	INTENSO	SEDENTARIO	FALSE						FALSE	FALSE	FALSE	FALSE	FALSE	FALSE	TRUE	FALSE	0	TRUE	FALSE	FALSE	TRUE	1086.03	26.8289	91.8815	50.5438	0.82483	-2.64702	81	50.5061	0.0239922	-3.14726	908	50.2368	0.421259	-2.39102	1093	50.0565	1.64574
PV091_Serie1	91	1	F	>55	Bachelor	DIESTRO	2017-06-14	60-85	158-185	24-30	FALSE	LEVE	MUY PESADO	FALSE				0	Frequent	FALSE	FALSE	FALSE	FALSE	FALSE	FALSE	FALSE	FALSE	0	TRUE	FALSE	FALSE	TRUE	1203.84	43.1792	111.974	48.4493	-1.44217	6.26993	333	48.1456	-2.83552	6.36403	209	47.9199	-1.64118	4.44942	459	47.5601	-1.9774
PV091_Serie2	91	2	F	>55	Bachelor	DIESTRO	2017-06-14	60-85	158-185	24-30	FALSE	LEVE	MUY PESADO	FALSE				0	Frequent	FALSE	FALSE	FALSE	FALSE	FALSE	FALSE	FALSE	FALSE	0	TRUE	FALSE	FALSE	TRUE	1281.52	48.3959	108.328	49.5598	-9.34605	1.93438	282	49.4254	-3.78486	1.746	65	49.3724	-10.789	-1.47996	616	49.3313	-8.10146
PV092_Serie1	92	1	F	<30	University studies	DIESTRO	2017-06-14	60-85	158-185	<24	TRUE	INTENSO	SEDENTARIO	FALSE				2	Frequent	TRUE	FALSE	FALSE	FALSE	FALSE	FALSE	FALSE	FALSE	26-50	FALSE	FALSE	FALSE	TRUE	1554.18	51.1918	132.766	59.9718	-3.38577	-5.17927	348	59.7475	-2.58324	-3.88757	68	59.5574	-2.05398	-4.75355	217	58.8002	-3.28784
PV092_Serie2	92	2	F	<30	University studies	DIESTRO	2017-06-14	60-85	158-185	<24	TRUE	INTENSO	SEDENTARIO	FALSE				2	Frequent	TRUE	FALSE	FALSE	FALSE	FALSE	FALSE	FALSE	FALSE	26-50	FALSE	FALSE	FALSE	TRUE	1544.28	55.9522	130.494	60.3682	-5.84963	-5.69682	632	60.2077	-3.42039	-3.96229	55	60.1783	-5.52821	-5.62031	290	60.1	-4.89856
PV093_Serie1	93	1	F	30-55	Bachelor	DIESTRO	2017-06-14	60-85	158-185	<24	FALSE	LEVE	MODERADO	FALSE				2	Frequent	TRUE	FALSE	FALSE	FALSE	FALSE	FALSE	FALSE	FALSE	26-50	FALSE	TRUE	FALSE	TRUE	1341.33	35.5602	114.838	59.1465	-2.12252	-5.60611	612	58.6065	-1.25709	-5.50858	294	58.5431	-3.12983	-4.81092	768	58.1523	-4.09274
PV093_Serie2	93	2	F	30-55	Bachelor	DIESTRO	2017-06-14	60-85	158-185	<24	FALSE	LEVE	MODERADO	FALSE				2	Frequent	TRUE	FALSE	FALSE	FALSE	FALSE	FALSE	FALSE	FALSE	26-50	FALSE	TRUE	FALSE	TRUE	1339.52	44.1212	114.141	61.6559	-3.22247	-5.44885	465	60.5497	-2.34352	-5.86039	209	60.543	-1.99275	-5.97061	714	60.4828	-3.10795
PV094_Serie1	94	1	M	30-55	University studies	DIESTRO	2017-06-15	60-85	158-185	<24	TRUE	INTENSO	MUY PESADO	FALSE						FALSE	FALSE	FALSE	FALSE	FALSE	FALSE	FALSE	FALSE	0	FALSE	FALSE	FALSE	TRUE	1440.43	46.0495	124.038	63.1569	0.0577982	0.0845703	213	62.8797	-0.704694	0.376425	470	62.7341	1.40385	0.18479	80	62.4234	1.87047
PV094_Serie2	94	2	M	30-55	University studies	DIESTRO	2017-06-15	60-85	158-185	<24	TRUE	INTENSO	MUY PESADO	FALSE						FALSE	FALSE	FALSE	FALSE	FALSE	FALSE	FALSE	FALSE	0	FALSE	FALSE	FALSE	TRUE	1415.8	54.9611	124.895	63.5641	4.28743	-0.196743	698	61.4374	3.53542	-0.900178	488	61.0335	5.4518	-0.577824	591	60.6647	4.37626
PV095_Serie1	95	1	M	30-55	Bachelor	DIESTRO	2017-06-15	60-85	158-185	24-30	FALSE	LEVE	MODERADO	FALSE				0	Frequent	TRUE	FALSE	FALSE	FALSE	FALSE	FALSE	FALSE	FALSE	26-50	FALSE	TRUE	FALSE	TRUE	1203.37	67.9103	115.641	54.0708	-7.31137	-1.81808	149	51.3425	-4.83015	-1.3495	462	51.1332	-9.00213	-1.66898	232	49.1157	-5.42656
PV095_Serie2	95	2	M	30-55	Bachelor	DIESTRO	2017-06-15	60-85	158-185	24-30	FALSE	LEVE	MODERADO	FALSE				0	Frequent	TRUE	FALSE	FALSE	FALSE	FALSE	FALSE	FALSE	FALSE	26-50	FALSE	TRUE	FALSE	TRUE	1155.58	84.7197	101.096	49.3844	-2.20282	1.03391	255	48.8848	-1.0477	-0.641419	82	48.4672	-0.387685	0.872344	367	48.3451	-0.672519
PV096_Serie1	96	1	F	<30	Bachelor	DIESTRO	2017-06-16	60-85	158-185	24-30	FALSE	LEVE	DE PIE	TRUE	<180	C	C	1	Discontinuous	TRUE	FALSE	FALSE	FALSE	FALSE	FALSE	FALSE	FALSE	1-25	FALSE	FALSE	FALSE	TRUE	1330.09	33.8963	114.819	62.0231	-0.0389607	3.62338	230	60.8182	-2.05128	0.558701	558	60.2875	-1.55779	1.95467	734	59.8469	-2.3949
PV096_Serie2	96	2	F	<30	Bachelor	DIESTRO	2017-06-16	60-85	158-185	24-30	FALSE	LEVE	DE PIE	TRUE	<180	C	C	1	Discontinuous	TRUE	FALSE	FALSE	FALSE	FALSE	FALSE	FALSE	FALSE	1-25	FALSE	FALSE	FALSE	TRUE	1320.23	42.809	113.791	62.8691	-0.226293	0.87182	445	61.0255	-1.47192	1.44823	177	60.2813	-1.24072	-1.97392	576	60.187	-0.191196
PV097_Serie1	97	1	F	30-55	University studies	DIESTRO	2017-06-16	<60	<158	<24	TRUE	MODERADO	DE PIE	FALSE						FALSE	FALSE	FALSE	FALSE	FALSE	FALSE	FALSE	FALSE	0	FALSE	FALSE	FALSE	FALSE	1375.72	37.2623	118.658	46.8187	-3.98528	0.870372	458	45.8507	-3.66063	-1.147	88	45.6306	-4.09568	-0.276853	280	44.6541	-1.23214
PV097_Serie2	97	2	F	30-55	University studies	DIESTRO	2017-06-16	<60	<158	<24	TRUE	MODERADO	DE PIE	FALSE						FALSE	FALSE	FALSE	FALSE	FALSE	FALSE	FALSE	FALSE	0	FALSE	FALSE	FALSE	FALSE	1156.44	47.2403	109.592	47.2598	-3.10767	2.63734	71	46.6215	-5.63417	1.79069	189	44.9541	-7.1836	-1.07608	630	44.5056	-7.14281
PV098_Serie1	98	1	M	30-55	Bachelor	DIESTRO	2017-06-16	60-85	158-185	<24	FALSE	LEVE	SEDENTARIO	FALSE						FALSE	FALSE	FALSE	FALSE	FALSE	FALSE	FALSE	FALSE	0	FALSE	FALSE	FALSE	TRUE	1620.35	55.9513	140.654	79.1993	-0.0501904	-1.33052	187	79.0637	2.14559	-2.91132	60	78.7684	-1.48926	-2.30837	312	78.0898	0.206787
PV098_Serie2	98	2	M	30-55	Bachelor	DIESTRO	2017-06-16	60-85	158-185	<24	FALSE	LEVE	SEDENTARIO	FALSE						FALSE	FALSE	FALSE	FALSE	FALSE	FALSE	FALSE	FALSE	0	FALSE	FALSE	FALSE	TRUE	1509.22	70.922	135.3	75.0042	1.91057	-1.87734	59	70.8866	-0.759684	-4.29767	591	69.0753	-4.24984	-4.48673	150	68.9729	-1.156
PV099_Serie1	99	1	M	>55	University studies	DIESTRO	2017-06-16	>85	158-185	24-30	TRUE	LEVE	SEDENTARIO	TRUE		E	C			FALSE	FALSE	FALSE	FALSE	FALSE	FALSE	FALSE	FALSE	0	TRUE	FALSE	TRUE	FALSE	1161.92	95.5526	111.778	59.2648	10.2022	-8.47653	163	57.3764	13.0028	-10.9486	331	56.3301	9.7724	-8.82598	222	55.9015	12.6331
PV099_Serie2	99	2	M	>55	University studies	DIESTRO	2017-06-16	>85	158-185	24-30	TRUE	LEVE	SEDENTARIO	TRUE		E	C			FALSE	FALSE	FALSE	FALSE	FALSE	FALSE	FALSE	FALSE	0	TRUE	FALSE	TRUE	FALSE	1185.44	109.358	111.812	56.291	11.3871	-7.0577	238	55.7027	9.43255	-9.39193	89	55.547	10.2048	-9.64537	139	54.2547	13.5376
PV100_Serie1	100	1	F	30-55	Bachelor	DIESTRO	2017-06-19	<60	158-185	<24	TRUE	LEVE	SEDENTARIO	TRUE	>365	G	C	2	Frequent	TRUE	FALSE	FALSE	FALSE	FALSE	FALSE	FALSE	FALSE	26-50	FALSE	TRUE	FALSE	TRUE	1309.1	42.5585	114.915	51.694	-8.48263	-8.24254	458	50.5075	-9.26296	-7.76692	584	49.3799	-5.39206	-5.97435	713	49.0408	-5.11329
PV100_Serie2	100	2	F	30-55	Bachelor	DIESTRO	2017-06-19	<60	158-185	<24	TRUE	LEVE	SEDENTARIO	TRUE	>365	G	C	2	Frequent	TRUE	FALSE	FALSE	FALSE	FALSE	FALSE	FALSE	FALSE	26-50	FALSE	TRUE	FALSE	TRUE	1354.95	36.3843	116.408	54.0567	-7.40185	-5.63066	732	53.6945	-5.86034	-5.62633	428	53.6843	-5.57253	-6.39927	264	53.237	-6.31332
PV101_Serie1	101	1	F	30-55	High school	DIESTRO	2017-06-19	60-85	158-185	24-30	FALSE	LEVE	SEDENTARIO	FALSE				2	Frequent	FALSE	FALSE	TRUE	FALSE	TRUE	FALSE	FALSE	TRUE	>50	FALSE	TRUE	FALSE	TRUE	821.15	42.8575	83.9007	39.4355	-1.99517	-0.664183	72	37.8493	-1.89276	-1.99189	192	35.1524	-1.41564	-1.18976	281	33.1815	-2.14994
PV101_Serie2	101	2	F	30-55	High school	DIESTRO	2017-06-19	60-85	158-185	24-30	FALSE	LEVE	SEDENTARIO	FALSE				2	Frequent	FALSE	FALSE	TRUE	FALSE	TRUE	FALSE	FALSE	TRUE	>50	FALSE	TRUE	FALSE	TRUE	782.069	63.6864	74.764	33.5849	-1.86812	-1.86106	208	33.3192	-0.564891	0.0870503	263	31.3596	-0.669395	-0.915808	320	30.9516	0.172478
PV102_Serie1	102	1	M	30-55	University studies	DIESTRO	2017-06-19	60-85	158-185	<24	FALSE	LEVE	SEDENTARIO	FALSE						TRUE	FALSE	FALSE	FALSE	FALSE	FALSE	FALSE	FALSE	1-25	FALSE	FALSE	FALSE	FALSE	1607.87	48.1398	140.181	68.876	-8.34162	3.64692	87	67.1771	-1.38323	7.73126	556	65.8498	2.54056	8.89893	803	65.685	-1.30137
PV102_Serie2	102	2	M	30-55	University studies	DIESTRO	2017-06-19	60-85	158-185	<24	FALSE	LEVE	SEDENTARIO	FALSE						TRUE	FALSE	FALSE	FALSE	FALSE	FALSE	FALSE	FALSE	1-25	FALSE	FALSE	FALSE	FALSE	1554.86	51.8979	133.406	64.4876	-4.0581	2.64992	81	63.3989	-1.47093	6.56259	830	63.1299	-2.25925	7.55623	461	63.0894	-2.52854
PV103_Serie1	103	1	F	>55	Bachelor	DIESTRO	2017-06-20	60-85	158-185	<24	TRUE	LEVE		TRUE	<180	F		1	Sporadic	FALSE	FALSE	FALSE	FALSE	FALSE	FALSE	FALSE	FALSE	26-50	FALSE	TRUE	FALSE	TRUE	1265.48	23.0423	101.818	65.771	-4.99912	-4.42272	757	65.3495	-4.03703	-2.80196	1204	65.1903	-2.7711	-5.01711	334	65.1596	-3.70642
PV103_Serie2	103	2	F	>55	Bachelor	DIESTRO	2017-06-20	60-85	158-185	<24	TRUE	LEVE		TRUE	<180	F		1	Sporadic	FALSE	FALSE	FALSE	FALSE	FALSE	FALSE	FALSE	FALSE	26-50	FALSE	TRUE	FALSE	TRUE	1183.49	22.9181	104.634	68.559	-2.4709	-4.03625	131	66.3634	-3.35465	-4.85628	408	66.0481	-1.96406	-4.53871	817	65.3314	-2.59971
PV104_Serie1	104	1	M	30-55	Bachelor	AMBIDIESTRO	2017-06-20	>85	158-185	>30	TRUE	MODERADO	SEDENTARIO	FALSE						FALSE	FALSE	FALSE	FALSE	FALSE	FALSE	FALSE	FALSE	0	FALSE	FALSE	FALSE	FALSE	1162.09	44.1523	100.896	56.3158	0.282059	-3.58586	559	56.2585	4.46649	-1.09051	201	56.2181	1.21624	-0.876985	322	55.8545	2.96946
PV104_Serie2	104	2	M	30-55	Bachelor	AMBIDIESTRO	2017-06-20	>85	158-185	>30	TRUE	MODERADO	SEDENTARIO	FALSE						FALSE	FALSE	FALSE	FALSE	FALSE	FALSE	FALSE	FALSE	0	FALSE	FALSE	FALSE	FALSE	1149.96	51.4295	101.524	56.2834	0.926092	-3.27864	154	53.5393	-0.671408	-0.715624	352	52.5848	1.97239	0.319487	253	51.8385	1.90503
PV105_Serie1	105	1	M	<30	University studies	DIESTRO	2017-06-20	60-85	158-185	<24	TRUE	INTENSO	SEDENTARIO	FALSE					Sporadic	FALSE	FALSE	FALSE	FALSE	FALSE	FALSE	FALSE	FALSE	1-25	FALSE	FALSE	FALSE	TRUE	1413.79	52.3626	122.336	71.6473	-2.3315	-4.58011	444	69.5789	1.0068	-3.88115	218	68.9842	-4.25862	-3.99605	762	68.4209	-1.1134
PV105_Serie2	105	2	M	<30	University studies	DIESTRO	2017-06-20	60-85	158-185	<24	TRUE	INTENSO	SEDENTARIO	FALSE					Sporadic	FALSE	FALSE	FALSE	FALSE	FALSE	FALSE	FALSE	FALSE	1-25	FALSE	FALSE	FALSE	TRUE	1255.05	62.0082	116.735	71.1777	-1.49139	-4.44087	188	70.8234	0.177388	-2.00688	545	70.2666	1.14831	-1.74809	282	69.9063	-0.0396202
PV106_Serie1	106	1	M	>55	University studies	DIESTRO	2017-06-20	>85	158-185	>30	TRUE	MODERADO	SEDENTARIO	FALSE				0	Sporadic	FALSE	FALSE	FALSE	FALSE	FALSE	FALSE	FALSE	TRUE	1-25	TRUE	FALSE	FALSE	TRUE	1064.94	32.3493	91.5531	55.2937	-3.4006	1.91756	784	55.179	-3.24502	2.27237	367	54.9749	-4.01047	2.21504	656	54.6028	-3.97272
PV106_Serie2	106	2	M	>55	University studies	DIESTRO	2017-06-20	>85	158-185	>30	TRUE	MODERADO	SEDENTARIO	FALSE				0	Sporadic	FALSE	FALSE	FALSE	FALSE	FALSE	FALSE	FALSE	TRUE	1-25	TRUE	FALSE	FALSE	TRUE	1133.21	36.6972	96.4995	54.9986	-3.58162	-0.0593019	226	54.819	-4.62958	-1.20863	501	54.5903	-2.31036	1.27109	373	54.3167	-3.03767
PV107_Serie1	107	1	F	30-55	University studies	DIESTRO	2017-06-20	<60	<158	<24	TRUE	LEVE	SEDENTARIO	TRUE	<180	H		0	Sporadic	FALSE	FALSE	FALSE	FALSE	FALSE	FALSE	FALSE	TRUE	1-25	FALSE	FALSE	FALSE	TRUE	1196.45	19.7825	104.123	52.851	2.30848	-4.6108	1611	52.8062	0.997987	-2.32346	99	51.0391	5.65054	-0.804185	1359	48.8109	2.76314
PV107_Serie2	107	2	F	30-55	University studies	DIESTRO	2017-06-20	<60	<158	<24	TRUE	LEVE	SEDENTARIO	TRUE	<180	H		0	Sporadic	FALSE	FALSE	FALSE	FALSE	FALSE	FALSE	FALSE	TRUE	1-25	FALSE	FALSE	FALSE	TRUE	1219.46	25.4903	104.203	54.1968	2.23927	-4.03445	679	53.4487	0.35296	-5.02403	1064	53.3742	2.57044	-3.712	1281	52.9414	2.71284
PV108_Serie1	108	1	M	30-55	Bachelor	DIESTRO	2017-06-20	60-85	158-185	24-30	FALSE	LEVE	SEDENTARIO	FALSE						FALSE	FALSE	FALSE	FALSE	FALSE	FALSE	FALSE	FALSE	0	FALSE	FALSE	FALSE	TRUE	1300.91	38.0829	104.761	61.3046	-3.49017	2.96257	344	60.8631	-4.74551	3.00443	203	60.8269	-2.72429	2.72467	481	60.7452	-1.96376
PV108_Serie2	108	2	M	30-55	Bachelor	DIESTRO	2017-06-20	60-85	158-185	24-30	FALSE	LEVE	SEDENTARIO	FALSE						FALSE	FALSE	FALSE	FALSE	FALSE	FALSE	FALSE	FALSE	0	FALSE	FALSE	FALSE	TRUE	1213.13	38.7829	103.018	61.6887	-6.29802	2.26673	445	61.342	-8.82027	1.52556	180	61.1569	-7.7251	2.63488	836	60.967	-6.70402
PV109_Serie1	109	1	F	<30	University studies	DIESTRO	2017-06-21	60-85	158-185	24-30	FALSE	LEVE	SEDENTARIO	FALSE						FALSE	FALSE	FALSE	FALSE	FALSE	FALSE	FALSE	FALSE	0	FALSE	FALSE	FALSE	FALSE	1248.25	87.6582	115.927	60.1876	0.69276	2.38083	240	59.5754	2.41895	3.24089	371	58.321	-3.98501	1.90427	51	58.2836	2.55706
PV109_Serie2	109	2	F	<30	University studies	DIESTRO	2017-06-21	60-85	158-185	24-30	FALSE	LEVE	SEDENTARIO	FALSE						FALSE	FALSE	FALSE	FALSE	FALSE	FALSE	FALSE	FALSE	0	FALSE	FALSE	FALSE	FALSE	1261.42	100.752	119.413	64.123	3.18407	2.65154	161	63.0206	2.36144	2.57042	220	60.7533	4.65772	3.94075	327	60.6583	-0.727489
PV110_Serie1	146	1	M	>55	Bachelor	DIESTRO	2017-11-03	>85	158-185	>30	FALSE	LEVE	SEDENTARIO	TRUE		E	C	1	Frequent	TRUE	FALSE	FALSE	FALSE	FALSE	FALSE	FALSE	FALSE	0	TRUE	FALSE	TRUE	TRUE	830.524	11.145	78.4232	45.0996	-3.91172	-0.660697	105	41.3996	-2.53739	-0.470181	685	40.3245	-2.51533	-0.0807096	973	39.7022	-1.8891
PV110_Serie2	146	2	M	>55	Bachelor	DIESTRO	2017-11-03	>85	158-185	>30	FALSE	LEVE	SEDENTARIO	TRUE		E	C	1	Frequent	TRUE	FALSE	FALSE	FALSE	FALSE	FALSE	FALSE	FALSE	0	TRUE	FALSE	TRUE	TRUE	733.033	12.492	70.0469	39.3086	-0.757437	0.965109	1555	34.9865	-2.30425	0.461631	328	34.8518	-2.8438	-0.742024	88	33.489	-1.10564
PV111_Serie1	147	1	M	<30	University studies	DIESTRO	2017-11-06	60-85	158-185	<24	TRUE	MODERADO	SEDENTARIO	TRUE		E	C	2	Frequent	FALSE	FALSE	FALSE	FALSE	FALSE	FALSE	FALSE	FALSE	0	FALSE	TRUE	FALSE	TRUE	1353.34	78.6825	132.335	59.0445	7.22803	3.90496	356	58.5447	7.62833	0.420154	206	56.1783	4.31465	2.24933	281	55.4139	6.15799
PV111_Serie2	147	2	M	<30	University studies	DIESTRO	2017-11-06	60-85	158-185	<24	TRUE	MODERADO	SEDENTARIO	TRUE		E	C	2	Frequent	FALSE	FALSE	FALSE	FALSE	FALSE	FALSE	FALSE	FALSE	0	FALSE	TRUE	FALSE	TRUE	1390.89	88.2541	131.192	56.71	3.5462	1.50507	345	55.7065	4.63303	2.43303	127	55.3772	3.58946	2.69983	50	55.1258	5.09417
PV112_Serie1	148	1	M	30-55	Bachelor	DIESTRO	2017-11-06	>85	158-185	24-30	FALSE	LEVE	SEDENTARIO	TRUE	>365			2	Frequent	TRUE	FALSE	FALSE	FALSE	FALSE	FALSE	FALSE	FALSE	0	TRUE	FALSE	TRUE	TRUE	1137.14	50.856	97.2208	55.4501	7.27219	-5.12034	613	55.2934	3.44395	-6.57703	146	54.9107	5.11042	-6.24535	527	54.8209	6.37977
PV112_Serie2	148	2	M	30-55	Bachelor	DIESTRO	2017-11-06	>85	158-185	24-30	FALSE	LEVE	SEDENTARIO	TRUE	>365			2	Frequent	TRUE	FALSE	FALSE	FALSE	FALSE	FALSE	FALSE	FALSE	0	TRUE	FALSE	TRUE	TRUE	1150.56	60.1757	98.0317	59.9184	1.9064	-8.88568	531	59.5725	1.78855	-6.84569	368	59.3819	2.34293	-8.01711	289	59.357	2.89909
PV113_Serie1	110	1	F	30-55	High school	DIESTRO	2017-06-21	60-85	158-185	24-30	TRUE	MODERADO	MODERADO	TRUE	>365			2	Frequent	FALSE	FALSE	FALSE	FALSE	FALSE	FALSE	FALSE	TRUE	>50	TRUE	TRUE	TRUE	TRUE	1407.83	58.7576	131.574	59.7852	-0.403521	0.946225	178	59.7611	-0.588323	-2.05467	63	59.4056	1.30816	0.747019	604	59.3064	-0.00393432
PV113_Serie2	110	2	F	30-55	High school	DIESTRO	2017-06-21	60-85	158-185	24-30	TRUE	MODERADO	MODERADO	TRUE	>365			2	Frequent	FALSE	FALSE	FALSE	FALSE	FALSE	FALSE	FALSE	TRUE	>50	TRUE	TRUE	TRUE	TRUE	1410.98	76.6837	131.181	61.318	-4.22653	-2.25902	55	60.963	-2.85059	-1.48505	132	60.4475	-3.01266	-0.572618	385	60.2428	-4.16276
PV114_Serie1	111	1	M	30-55	University studies	ZURDO	2017-06-21	60-85	158-185	<24	TRUE	LEVE	DE PIE	FALSE						FALSE	FALSE	FALSE	FALSE	TRUE	TRUE	TRUE	TRUE	0	FALSE	FALSE	FALSE	FALSE	807.461	40.6986	76.8128	44.3382	-1.64322	-2.37901	251	43.8806	-1.17022	-2.82487	155	43.3626	1.15558	-1.06444	345	43.2728	-2.13575
PV114_Serie2	111	2	M	30-55	University studies	ZURDO	2017-06-21	60-85	158-185	<24	TRUE	LEVE	DE PIE	FALSE						FALSE	FALSE	FALSE	FALSE	TRUE	TRUE	TRUE	TRUE	0	FALSE	FALSE	FALSE	FALSE	832.751	52.0469	80.2277	47.37	2.81967	0.257404	408	45.9681	4.97081	1.77441	191	43.6459	3.95982	1.05266	123	42.6818	5.56656
PV115_Serie1	112	1	M	<30	University studies	DIESTRO	2017-06-22	60-85	158-185	24-30	FALSE	MODERADO	SEDENTARIO	FALSE				2	Discontinuous	TRUE	FALSE	FALSE	FALSE	FALSE	FALSE	FALSE	FALSE	26-50	FALSE	FALSE	FALSE	TRUE	1228.14	67.3323	115.291	57.0122	2.79756	-0.260358	65	56.8483	0.761044	-2.3694	243	55.795	1.85643	-1.33988	403	55.6267	4.8081
PV115_Serie2	112	2	M	<30	University studies	DIESTRO	2017-06-22	60-85	158-185	24-30	FALSE	MODERADO	SEDENTARIO	FALSE				2	Discontinuous	TRUE	FALSE	FALSE	FALSE	FALSE	FALSE	FALSE	FALSE	26-50	FALSE	FALSE	FALSE	TRUE	1254.85	72.6185	111.685	58.9181	1.69538	-1.02739	270	58.8233	3.89924	-0.564996	345	58.1634	3.26797	1.1211	128	57.4343	2.18081
PV116_Serie1	113	1	M	30-55	University studies	DIESTRO	2017-06-23	60-85	158-185	<24	TRUE	LEVE	SEDENTARIO	TRUE	<180	C	B	0	Frequent	FALSE	FALSE	FALSE	FALSE	FALSE	FALSE	FALSE	FALSE	26-50	FALSE	TRUE	FALSE	TRUE	1125.26	59.8544	106.812	56.4935	-0.271647	-2.88263	346	56.3666	-0.150344	-3.4168	270	55.9683	-1.68972	-2.73222	170	55.0259	0.346292
PV116_Serie2	113	2	M	30-55	University studies	DIESTRO	2017-06-23	60-85	158-185	<24	TRUE	LEVE	SEDENTARIO	TRUE	<180	C	B	0	Frequent	FALSE	FALSE	FALSE	FALSE	FALSE	FALSE	FALSE	FALSE	26-50	FALSE	TRUE	FALSE	TRUE	1101.18	84.7063	107.176	61.7445	-0.0130994	-3.25076	241	61.693	1.48979	-1.85444	179	61.6055	1.04911	-3.73866	118	60.6315	0.038164
PV117_Serie1	114	1	M	<30	University studies	DIESTRO	2017-06-23	60-85	158-185	24-30	FALSE	LEVE	SEDENTARIO	TRUE	<180	E	E	0	Frequent	TRUE	FALSE	FALSE	FALSE	FALSE	FALSE	FALSE	FALSE	>50	FALSE	FALSE	TRUE	TRUE	1476.78	68.4965	128.589	69.2335	4.57742	-3.1371	424	67.8659	-2.99299	-6.32449	515	67.3581	3.14731	-1.17361	341	66.5649	-0.871569
PV117_Serie2	114	2	M	<30	University studies	DIESTRO	2017-06-23	60-85	158-185	24-30	FALSE	LEVE	SEDENTARIO	TRUE	<180	E	E	0	Frequent	TRUE	FALSE	FALSE	FALSE	FALSE	FALSE	FALSE	FALSE	>50	FALSE	FALSE	TRUE	TRUE	1355.67	79.9332	126.258	64.6242	-0.0535705	-2.23683	65	64.3445	-2.97711	-3.9484	147	63.1166	4.02015	0.365577	457	62.6474	1.00682
PV118_Serie1	118	1	F	<30	Bachelor	DIESTRO	2017-06-27	60-85	158-185	<24	TRUE	MODERADO	SEDENTARIO	TRUE	<180	E	C	0	Frequent	TRUE	FALSE	FALSE	FALSE	FALSE	FALSE	FALSE	FALSE	26-50	TRUE	FALSE	FALSE	TRUE	1474.47	45.5082	130.755	66.403	0.410307	-2.91367	259	64.7909	1.60232	-4.47566	108	63.9843	-0.164856	-2.83758	393	63.7606	-1.08379
PV118_Serie2	118	2	F	<30	Bachelor	DIESTRO	2017-06-27	60-85	158-185	<24	TRUE	MODERADO	SEDENTARIO	TRUE	<180	E	C	0	Frequent	TRUE	FALSE	FALSE	FALSE	FALSE	FALSE	FALSE	FALSE	26-50	TRUE	FALSE	FALSE	TRUE	1424.85	44.2499	125.295	72.7104	-1.17154	-3.72737	217	72.1369	-2.15015	-5.2749	770	71.2891	-2.19703	-3.62614	357	71.1633	0.0471576
PV119_Serie1	119	1	F	<30	University studies	DIESTRO	2017-06-28	60-85	158-185	<24	TRUE	LEVE	SEDENTARIO	FALSE						FALSE	FALSE	FALSE	FALSE	FALSE	FALSE	FALSE	FALSE	0	FALSE	FALSE	FALSE	FALSE	1639.62	62.3906	140.238	66.6119	-2.76062	1.36177	611	65.7527	-9.26914	-1.23505	727	65.1932	-4.48486	1.52397	295	64.7135	-4.35919
PV119_Serie2	119	2	F	<30	University studies	DIESTRO	2017-06-28	60-85	158-185	<24	TRUE	LEVE	SEDENTARIO	FALSE						FALSE	FALSE	FALSE	FALSE	FALSE	FALSE	FALSE	FALSE	0	FALSE	FALSE	FALSE	FALSE	1568.14	65.9993	136.864	65.5012	-4.84959	-0.926988	454	63.6219	-4.44058	2.917	657	63.0275	-8.48609	0.333033	556	62.494	2.02298
PV120_Serie1	120	1	M	<30	University studies	DIESTRO	2017-06-30	60-85	158-185	<24	TRUE	MODERADO	SEDENTARIO	FALSE						FALSE	FALSE	FALSE	FALSE	FALSE	FALSE	FALSE	FALSE	0	FALSE	FALSE	FALSE	FALSE	1311.12	56.7094	122.325	55.7701	-3.11895	-4.67003	161	55.0165	-4.39824	-5.94991	383	54.2294	-2.62704	-4.80452	486	54.0186	-3.83861
PV120_Serie2	120	2	M	<30	University studies	DIESTRO	2017-06-30	60-85	158-185	<24	TRUE	MODERADO	SEDENTARIO	FALSE						FALSE	FALSE	FALSE	FALSE	FALSE	FALSE	FALSE	FALSE	0	FALSE	FALSE	FALSE	FALSE	1182.09	58.0593	113.107	53.9724	-6.08834	-6.07901	149	52.5327	-4.8214	-5.35955	432	51.9818	-5.24534	-5.75814	521	51.3559	-9.03567
PV121_Serie1	121	1	M	30-55	Bachelor	DIESTRO	2017-06-30	>85	>185	24-30	TRUE	MODERADO	SEDENTARIO	FALSE				2	Discontinuous	FALSE	FALSE	FALSE	FALSE	FALSE	FALSE	FALSE	FALSE	0	FALSE	FALSE	FALSE	TRUE	1129.53	32.7591	105.23	46.6237	-1.16448	-2.39205	854	46.1515	-3.10287	-5.10471	226	46.0412	-2.15255	-4.22394	70	45.9201	-2.75178
PV121_Serie2	121	2	M	30-55	Bachelor	DIESTRO	2017-06-30	>85	>185	24-30	TRUE	MODERADO	SEDENTARIO	FALSE				2	Discontinuous	FALSE	FALSE	FALSE	FALSE	FALSE	FALSE	FALSE	FALSE	0	FALSE	FALSE	FALSE	TRUE	1212.49	26.825	103.447	51.036	-3.36869	-1.4844	634	50.9012	-4.92466	-1.91838	821	50.7975	-3.38634	-2.49252	457	50.783	-5.54841
PV122_Serie1	122	1	M	30-55	University studies	DIESTRO	2017-06-30	60-85	158-185	24-30	FALSE	LEVE	SEDENTARIO	FALSE				2	Frequent	FALSE	FALSE	TRUE	FALSE	FALSE	FALSE	FALSE	FALSE	0	FALSE	FALSE	TRUE	TRUE	1221.72	26.3756	104.024	45.3287	0.149927	-0.311171	82	44.5671	-2.21371	-0.682328	274	43.9723	-5.00792	-0.161846	869	43.7904	-2.86606
PV122_Serie2	122	2	M	30-55	University studies	DIESTRO	2017-06-30	60-85	158-185	24-30	FALSE	LEVE	SEDENTARIO	FALSE				2	Frequent	FALSE	FALSE	TRUE	FALSE	FALSE	FALSE	FALSE	FALSE	0	FALSE	FALSE	TRUE	TRUE	1158.88	22.2178	98.7559	49.318	-1.92294	-2.13843	84	49.1269	-1.68787	-0.946218	489	48.5745	-1.33627	-2.21166	277	47.8706	-2.60531
PV123_Serie1	123	1	M	30-55	Bachelor	DIESTRO	2017-06-30	60-85	158-185	<24	TRUE	MODERADO	MODERADO	FALSE				0	Frequent	TRUE	FALSE	FALSE	FALSE	FALSE	FALSE	TRUE	FALSE	0	TRUE	TRUE	TRUE	TRUE	896.694	36.0408	84.4991	46.2444	0.771017	-0.85837	601	44.3016	0.393483	-2.57435	698	43.8925	1.36065	-1.29827	500	40.4556	-0.584094
PV123_Serie2	123	2	M	30-55	Bachelor	DIESTRO	2017-06-30	60-85	158-185	<24	TRUE	MODERADO	MODERADO	FALSE				0	Frequent	TRUE	FALSE	FALSE	FALSE	FALSE	FALSE	TRUE	FALSE	0	TRUE	TRUE	TRUE	TRUE	679.246	36.5186	74.2098	42.3597	-0.46729	-0.355795	57	36.6642	3.73239	0.897094	237	34.5876	3.04679	-0.12885	146	33.7112	6.50487
PV124_Serie1	124	1	M	30-55	Bachelor	DIESTRO	2017-06-30	>85	158-185	24-30	FALSE	LEVE	SEDENTARIO	TRUE	<180	E	D			FALSE	FALSE	FALSE	FALSE	FALSE	FALSE	FALSE	FALSE	0	FALSE	FALSE	FALSE	TRUE	1194.92	43.0448	101.759	46.3265	-0.405878	-1.5448	182	46	4.89996	-0.756964	640	45.9806	-0.984825	-2.076	73	45.6776	2.05878
PV124_Serie2	124	2	M	30-55	Bachelor	DIESTRO	2017-06-30	>85	158-185	24-30	FALSE	LEVE	SEDENTARIO	TRUE	<180	E	D			FALSE	FALSE	FALSE	FALSE	FALSE	FALSE	FALSE	FALSE	0	FALSE	FALSE	FALSE	TRUE	1118.8	45.8523	98.6285	48.9005	-1.2322	-1.80975	65	47.1093	-1.32363	-1.70347	478	47.0198	0.885498	-1.92075	578	45.7759	-4.79737
PV125_Serie1	125	1	M	30-55	Bachelor	AMBIDIESTRO	2017-07-10	>85	158-185	>30	TRUE	INTENSO	MUY PESADO	FALSE						FALSE	FALSE	FALSE	FALSE	FALSE	FALSE	FALSE	FALSE	0	FALSE	FALSE	FALSE	FALSE	1014.37	53.727	86.7164	50.0468	9.72045	0.609047	48	49.4237	10.1461	1.09192	121	49.011	7.29211	-1.2557	360	48.0676	6.90104
PV125_Serie2	125	2	M	30-55	Bachelor	AMBIDIESTRO	2017-07-10	>85	158-185	>30	TRUE	INTENSO	MUY PESADO	FALSE						FALSE	FALSE	FALSE	FALSE	FALSE	FALSE	FALSE	FALSE	0	FALSE	FALSE	FALSE	FALSE	1012.46	55.6295	85.959	47.7334	7.94968	-0.219136	500	47.7041	8.19356	-1.42193	45	46.9408	6.22923	-1.38318	119	46.1229	8.43616
PV126_Serie1	126	1	M	<30	University studies	DIESTRO	2017-07-10	60-85	158-185	<24	TRUE	LEVE	DE PIE	TRUE	<180	D	C			FALSE	FALSE	FALSE	FALSE	FALSE	FALSE	FALSE	FALSE	0	FALSE	FALSE	FALSE	FALSE	1221.73	35.1071	107.026	58.3785	-2.2792	1.38424	932	58.0934	-1.60213	1.65537	211	57.5452	-1.96046	2.31723	353	57.5148	0.201281
PV126_Serie2	126	2	M	<30	University studies	DIESTRO	2017-07-10	60-85	158-185	<24	TRUE	LEVE	DE PIE	TRUE	<180	D	C			FALSE	FALSE	FALSE	FALSE	FALSE	FALSE	FALSE	FALSE	0	FALSE	FALSE	FALSE	FALSE	1301.2	30.8927	115.706	64.3277	1.61874	1.4325	434	63.1999	-0.608753	1.00236	250	60.7403	1.82079	1.65365	1134	56.1881	1.57487
PV127_Serie1	38	1	F	>55	High school	AMBIDIESTRO	2017-05-12	60-85	158-185	24-30	TRUE	LEVE	MODERADO	FALSE						FALSE	FALSE	TRUE	FALSE	FALSE	FALSE	FALSE	FALSE	0	FALSE	FALSE	FALSE	FALSE	1057.29	39.6881	99.0909	62.9381	-3.45153	-1.31357	730	56.6781	-4.41717	-3.72063	610	56.4558	-4.757	-4.67867	245	52.3888	-4.91184
PV127_Serie2	38	2	F	>55	High school	AMBIDIESTRO	2017-05-12	60-85	158-185	24-30	TRUE	LEVE	MODERADO	FALSE						FALSE	FALSE	TRUE	FALSE	FALSE	FALSE	FALSE	FALSE	0	FALSE	FALSE	FALSE	FALSE	1000.65	63.6545	97.2797	66.5376	-5.74631	-1.8152	194	64.5718	-4.76024	-2.01152	339	63.7048	-5.09073	-0.571526	269	63.154	-9.34101
PV128_Serie1	39	1	F	<30	University studies	DIESTRO	2017-05-16	<60	158-185	<24	FALSE	INTENSO	DE PIE	TRUE	>365	E	C			FALSE	FALSE	FALSE	FALSE	FALSE	FALSE	FALSE	FALSE	26-50	FALSE	FALSE	FALSE	FALSE	1423.43	79.0792	123.121	66.2861	-9.1164	-7.48806	282	65.223	-8.88733	-5.91177	507	64.3919	-11.4533	-8.26439	436	64.2244	-7.7328
PV128_Serie2	39	2	F	<30	University studies	DIESTRO	2017-05-16	<60	158-185	<24	FALSE	INTENSO	DE PIE	TRUE	>365	E	C			FALSE	FALSE	FALSE	FALSE	FALSE	FALSE	FALSE	FALSE	26-50	FALSE	FALSE	FALSE	FALSE	1341.82	86.2352	127.893	65.8533	-9.23015	-4.41092	118	63.294	-10.0509	-5.3401	190	62.6344	-14.4934	-5.56459	327	61.8373	-6.09212
PV129_Serie1	40	1	F	30-55	University studies	DIESTRO	2017-05-16	<60	158-185	<24	TRUE	MODERADO	SEDENTARIO	FALSE						FALSE	FALSE	FALSE	FALSE	FALSE	FALSE	FALSE	FALSE	0	FALSE	FALSE	FALSE	FALSE	924.363	15.5932	81.4216	61.7664	5.23359	-7.25393	1022	61.3575	1.38673	-6.47844	1577	60.4689	6.93361	-6.16772	291	60.0085	0.855729
PV129_Serie2	40	2	F	30-55	University studies	DIESTRO	2017-05-16	<60	158-185	<24	TRUE	MODERADO	SEDENTARIO	FALSE						FALSE	FALSE	FALSE	FALSE	FALSE	FALSE	FALSE	FALSE	0	FALSE	FALSE	FALSE	FALSE	937.132	50.9311	80.9726	62.3057	3.85779	-6.34742	361	61.6327	0.383421	-4.71536	58	61.4451	7.09376	-8.70051	518	61.3097	6.93865
PV130_Serie1	127	1	F	<30	High school	DIESTRO	2017-07-11	>85	<158	>30	FALSE	LEVE	SEDENTARIO	TRUE	>365	F	C	2	Frequent	FALSE	FALSE	FALSE	FALSE	FALSE	FALSE	FALSE	FALSE	26-50	FALSE	TRUE	TRUE	TRUE	1085.1	55.7032	105.247	49.8615	-6.66627	0.350084	335	47.2315	-8.17742	0.336038	420	46.8196	-7.34345	0.357028	155	44.975	-5.09998
PV130_Serie2	127	2	F	<30	High school	DIESTRO	2017-07-11	>85	<158	>30	FALSE	LEVE	SEDENTARIO	TRUE	>365	F	C	2	Frequent	FALSE	FALSE	FALSE	FALSE	FALSE	FALSE	FALSE	FALSE	26-50	FALSE	TRUE	TRUE	TRUE	923.855	54.6013	88.874	40.1177	-9.12771	-0.0139513	326	39.5275	-9.03612	-0.330757	170	36.6465	-8.78804	-0.187769	252	36.1714	-8.94418
PV131_Serie1	128	1	M	30-55	Bachelor	DIESTRO	2017-07-11	60-85	>185	<24	TRUE	INTENSO	MODERADO	FALSE						FALSE	FALSE	FALSE	FALSE	FALSE	FALSE	TRUE	FALSE	0	FALSE	FALSE	FALSE	FALSE	1244.52	64.6838	107.669	61.0942	0.118955	-7.82688	464	59.5503	2.01806	-8.11848	547	58.9804	1.21436	-6.8308	383	58.9006	0.0401807
PV131_Serie2	128	2	M	30-55	Bachelor	DIESTRO	2017-07-11	60-85	>185	<24	TRUE	INTENSO	MODERADO	FALSE						FALSE	FALSE	FALSE	FALSE	FALSE	FALSE	TRUE	FALSE	0	FALSE	FALSE	FALSE	FALSE	1099.83	65.7791	104.782	59.4252	1.9968	-3.67719	360	58.4439	1.56679	-4.93543	283	57.9399	0.275838	-6.20787	211	57.0703	2.73729
PV132_Serie1	129	1	M	30-55	Bachelor	DIESTRO	2017-07-14	60-85	158-185	24-30	TRUE	INTENSO	DE PIE	FALSE						FALSE	FALSE	FALSE	FALSE	TRUE	FALSE	TRUE	FALSE	0	FALSE	FALSE	FALSE	TRUE	1152.01	36.1359	102.2	53.7907	5.8773	-6.02286	775	53.6972	3.81988	-6.85238	243	51.9115	4.56829	-3.24068	97	49.7199	4.65442
PV132_Serie2	129	2	M	30-55	Bachelor	DIESTRO	2017-07-14	60-85	158-185	24-30	TRUE	INTENSO	DE PIE	FALSE						FALSE	FALSE	FALSE	FALSE	TRUE	FALSE	TRUE	FALSE	0	FALSE	FALSE	FALSE	TRUE	1046.71	32.5875	95.1431	54.2718	3.39056	-5.63067	269	53.2902	2.72501	-6.03823	546	52.4978	2.67197	-3.98441	119	48.1414	0.681695
PV133_Serie1	133	1	F	30-55	High school	DIESTRO	2017-07-17	<60	<158	<24	TRUE	MODERADO	MUY PESADO	FALSE				0	Frequent	TRUE	FALSE	FALSE	FALSE	TRUE	FALSE	FALSE	TRUE	>50	FALSE	FALSE	FALSE	TRUE	916.956	21.9368	112.457	70.3113	6.98579	-7.3073	106	38.6849	10.8348	-5.97448	307	38.4653	11.5974	-4.22265	483	36.3523	8.76686
PV133_Serie2	133	2	F	30-55	High school	DIESTRO	2017-07-17	<60	<158	<24	TRUE	MODERADO	MUY PESADO	FALSE				0	Frequent	TRUE	FALSE	FALSE	FALSE	TRUE	FALSE	FALSE	TRUE	>50	FALSE	FALSE	FALSE	TRUE	1304.76	22.5894	79.8347	30.6584	6.74242	-1.07771	122	25.6919	7.75334	1.17394	1142	24.1479	7.17287	1.08114	1431	23.9431	7.91712
PV134_Serie1	134	1	M	30-55	High school	DIESTRO	2017-07-18	>85	>185	>30	FALSE	LEVE	DE PIE	TRUE	<180	E	E	0	Sporadic	FALSE	FALSE	FALSE	FALSE	FALSE	FALSE	FALSE	TRUE	26-50	TRUE	FALSE	TRUE	TRUE	1186.45	33.44	101.458	56.0977	-1.30467	-2.4121	241	56.027	-2.68266	-1.97405	840	55.1361	-1.44172	-2.06831	88	54.2573	-1.78498
PV134_Serie2	134	2	M	30-55	High school	DIESTRO	2017-07-18	>85	>185	>30	FALSE	LEVE	DE PIE	TRUE	<180	E	E	0	Sporadic	FALSE	FALSE	FALSE	FALSE	FALSE	FALSE	FALSE	TRUE	26-50	TRUE	FALSE	TRUE	TRUE	1169.8	45.2011	100.118	55.5105	1.97911	0.595028	707	55.4782	0.776318	-1.33677	387	54.9058	1.61061	-1.52502	598	54.5366	3.15396
PV135_Serie1	135	1	F	30-55	University studies	DIESTRO	2017-07-18	<60	158-185	<24	TRUE	MODERADO	DE PIE	TRUE	<180	E	D	1	Discontinuous	FALSE	FALSE	FALSE	FALSE	FALSE	FALSE	FALSE	TRUE	26-50	TRUE	FALSE	TRUE	TRUE	1197.09	38.467	102.685	60.626	1.91761	2.75365	517	60.2685	-0.8646	0.783119	767	60.1737	0.118269	3.12023	886	59.9524	-0.188572
PV135_Serie2	135	2	F	30-55	University studies	DIESTRO	2017-07-18	<60	158-185	<24	TRUE	MODERADO	DE PIE	TRUE	<180	E	D	1	Discontinuous	FALSE	FALSE	FALSE	FALSE	FALSE	FALSE	FALSE	TRUE	26-50	TRUE	FALSE	TRUE	TRUE	1228.46	48.3647	105.007	58.7785	-3.13514	0.949593	390	58.4873	-1.79256	0.525124	174	57.479	-0.102031	0.939834	282	57.1311	-3.61672
PV136_Serie1	136	1	F	30-55	Bachelor	AMBIDIESTRO	2017-07-21	60-85	158-185	24-30	TRUE	MODERADO	MODERADO	TRUE	>365	E	C	2	Frequent	TRUE	FALSE	FALSE	FALSE	FALSE	FALSE	FALSE	TRUE	>50	FALSE	TRUE	FALSE	TRUE	813.345	28.5184	85.8954	45.287	-7.75431	-5.14397	153	33.0254	-5.94509	-8.22935	866	32.7086	-5.33596	-6.88329	544	32.157	-6.78166
PV136_Serie2	136	2	F	30-55	Bachelor	AMBIDIESTRO	2017-07-21	60-85	158-185	24-30	TRUE	MODERADO	MODERADO	TRUE	>365	E	C	2	Frequent	TRUE	FALSE	FALSE	FALSE	FALSE	FALSE	FALSE	TRUE	>50	FALSE	TRUE	FALSE	TRUE	553.753	13.9274	60.645	32.885	-2.88008	-3.08645	127	30.0208	-3.2929	-5.7698	334	26.5544	-5.17131	-7.0238	522	26.1826	-5.48943
PV137_Serie1	137	1	F	30-55	High school	DIESTRO	2017-07-21	60-85	<158	>30	FALSE	LEVE	SEDENTARIO	TRUE	<180	E	A	0	Frequent	FALSE	FALSE	FALSE	FALSE	FALSE	FALSE	FALSE	FALSE	>50	FALSE	TRUE	TRUE	TRUE	558.422	18.9167	59.1231	33.8901	2.73586	1.16329	642	30.3587	3.72892	2.13868	366	29.7661	3.13677	0.287491	767	27.6849	3.37042
PV137_Serie2	137	2	F	30-55	High school	DIESTRO	2017-07-21	60-85	<158	>30	FALSE	LEVE	SEDENTARIO	TRUE	<180	E	A	0	Frequent	FALSE	FALSE	FALSE	FALSE	FALSE	FALSE	FALSE	FALSE	>50	FALSE	TRUE	TRUE	TRUE	489.199	13.9135	46.706	26.2086	0.75102	2.06945	660	25.3413	0.583446	2.0373	524	22.318	2.95519	1.99642	381	22.2752	2.5681
PV138_Serie1	138	1	F	30-55	University studies	DIESTRO	2017-07-24	60-85	158-185	<24	TRUE	MODERADO	MUY PESADO	TRUE	<180	F	C	0	Discontinuous	FALSE	FALSE	FALSE	FALSE	FALSE	FALSE	FALSE	FALSE	26-50	TRUE	FALSE	TRUE	TRUE	1334.94	52.8897	118.443	59.5516	-1.1647	-1.24471	159	59.4249	1.95414	-0.957959	588	57.4252	-1.20016	-0.0578964	485	57.1684	2.04244
PV138_Serie2	138	2	F	30-55	University studies	DIESTRO	2017-07-24	60-85	158-185	<24	TRUE	MODERADO	MUY PESADO	TRUE	<180	F	C	0	Discontinuous	FALSE	FALSE	FALSE	FALSE	FALSE	FALSE	FALSE	FALSE	26-50	TRUE	FALSE	TRUE	TRUE	1202.39	45.1347	114.105	62.7165	-5.21373	-1.53551	660	62.1382	0.7866	0.0127503	321	62.1203	-1.93283	-1.96478	550	61.6607	2.1845
PV139_Serie1	139	1	F	30-55	Bachelor	DIESTRO	2017-07-24	<60	158-185	<24	TRUE	LEVE	SEDENTARIO	TRUE	<180	G	C	1	Frequent	TRUE	FALSE	FALSE	FALSE	TRUE	TRUE	FALSE	TRUE	>50	TRUE	TRUE	TRUE	TRUE	604.311	23.207	65.3373	39.2473	-3.27048	-0.609816	67	34.7679	-2.88369	-2.67157	183	29.7015	-1.89341	-1.02979	429	29.3496	-1.39186
PV139_Serie2	139	2	F	30-55	Bachelor	DIESTRO	2017-07-24	<60	158-185	<24	TRUE	LEVE	SEDENTARIO	TRUE	<180	G	C	1	Frequent	TRUE	FALSE	FALSE	FALSE	TRUE	TRUE	FALSE	TRUE	>50	TRUE	TRUE	TRUE	TRUE	761.809	28.5964	71.6154	44.7794	-6.5431	-1.51083	69	39.5167	-7.94192	-5.11038	735	39.0788	-7.20731	-4.74154	623	38.6893	-7.18498
PV140_Serie1	140	1	F	30-55	University studies	DIESTRO	2017-07-19	60-85	158-185	24-30	FALSE	LEVE	SEDENTARIO	FALSE				2	Sporadic	FALSE	FALSE	FALSE	FALSE	FALSE	FALSE	FALSE	FALSE	0	FALSE	TRUE	FALSE	TRUE	1135.39	59.0119	107.487	57.8193	-2.95471	-0.801169	339	57.3152	-4.77215	-1.42858	179	57.241	0.120365	-0.549031	77	55.7405	-3.80056
PV140_Serie2	140	2	F	30-55	University studies	DIESTRO	2017-07-19	60-85	158-185	24-30	FALSE	LEVE	SEDENTARIO	FALSE				2	Sporadic	FALSE	FALSE	FALSE	FALSE	FALSE	FALSE	FALSE	FALSE	0	FALSE	TRUE	FALSE	TRUE	1140.84	63.8052	105.991	61.8765	-6.27944	-2.26882	295	61.8762	-5.22533	-2.31443	455	61.8732	-6.42217	-4.32526	215	61.8027	-5.33409
PV141_Serie1	115	1	M			DIESTRO	2017-06-23	60-85	158-185	<24	TRUE	LEVE		FALSE						FALSE	FALSE	FALSE	FALSE	FALSE	FALSE	FALSE	FALSE	1-25	FALSE	FALSE	FALSE	FALSE	1233.13	65.8723	126.407	84.2985	-4.05049	4.82685	522	77.9619	-2.01502	4.80905	444	68.8453	-2.32937	4.61383	366	66.8678	3.02497
PV141_Serie2	115	2	M			DIESTRO	2017-06-23	60-85	158-185	<24	TRUE	LEVE		FALSE						FALSE	FALSE	FALSE	FALSE	FALSE	FALSE	FALSE	FALSE	1-25	FALSE	FALSE	FALSE	FALSE	1310.76	81.1112	122.78	73.9969	3.89589	5.73057	415	69.1615	8.88766	6.08249	219	68.1553	4.88682	5.51574	345	67.9039	6.71874
PV142_Serie1	116	1	M			DIESTRO	2017-06-27	>85	158-185	24-30	TRUE	LEVE		FALSE						FALSE	FALSE	FALSE	FALSE	FALSE	FALSE	FALSE	FALSE	0	FALSE	FALSE	FALSE	FALSE	1193.34	78.7164	125.382	58.4003	-4.95505	-0.866456	286	45.3617	-6.02591	-0.136803	216	44.4651	-6.14099	-4.82384	147	42.8299	-2.96587
PV142_Serie2	116	2	M			DIESTRO	2017-06-27	>85	158-185	24-30	TRUE	LEVE		FALSE						FALSE	FALSE	FALSE	FALSE	FALSE	FALSE	FALSE	FALSE	0	FALSE	FALSE	FALSE	FALSE	1311.73	85.3991	125.405	60.4836	-9.55596	-1.28842	494	60.4308	-6.10171	-1.54919	349	58.6114	-3.30276	0.0539162	211	54.2616	0.0111114
PV143_Serie1	117	1	F	30-55	Bachelor	DIESTRO	2017-06-27	60-85	158-185	24-30	FALSE	LEVE	SEDENTARIO	FALSE						FALSE	FALSE	FALSE	FALSE	TRUE	FALSE	FALSE	TRUE	1-25	FALSE	FALSE	FALSE	FALSE	1133.1	50.6754	102.907	60.3732	2.58488	3.2045	527	58.242	4.53436	2.87419	613	55.9807	4.78226	3.68094	440	51.7376	3.56356
PV143_Serie2	117	2	F	30-55	Bachelor	DIESTRO	2017-06-27	60-85	158-185	24-30	FALSE	LEVE	SEDENTARIO	FALSE						FALSE	FALSE	FALSE	FALSE	TRUE	FALSE	FALSE	TRUE	1-25	FALSE	FALSE	FALSE	FALSE	1039.51	51.3591	91.513	47.3747	-5.55999	0.0350393	488	47.148	-9.24945	-3.42964	399	45.4524	-8.78201	-0.994892	311	44.5272	-8.28337
PV146_Serie1	141	1		>55	University studies		2017-07-25	<60	158-185	<24	FALSE	LEVE	SEDENTARIO	FALSE						FALSE	FALSE	FALSE	FALSE	FALSE	FALSE	FALSE	FALSE	0	FALSE	FALSE	FALSE	FALSE	839.63	23.2972	71.3849	42.8665	2.64285	5.15543	336	41.4105	0.134311	3.1943	131	40.8916	2.11497	6.05518	933	39.2187	3.53396
PV146_Serie2	141	2		>55	University studies		2017-07-25	<60	158-185	<24	FALSE	LEVE	SEDENTARIO	FALSE						FALSE	FALSE	FALSE	FALSE	FALSE	FALSE	FALSE	FALSE	0	FALSE	FALSE	FALSE	FALSE	645.646	23.4951	70.9782	40.8859	1.7429	2.33524	92	38.6445	1.98455	2.6865	239	33.6119	2.38589	4.20802	375	30.189	4.53002
PV147_Serie1	142	1		31	University studies		2017-07-25	60-85	158-185	24-30	FALSE	LEVE	MODERADO	FALSE						FALSE	FALSE	FALSE	FALSE	FALSE	TRUE	FALSE	TRUE	0	FALSE	FALSE	FALSE	FALSE	991.059	72.4458	97.6992	57.6869	1.476	-6.79009	297	56.4501	5.01909	-4.87145	118	52.2478	3.88256	-3.15101	180	52.1067	2.09131
PV147_Serie2	142	2		31	University studies		2017-07-25	60-85	158-185	24-30	FALSE	LEVE	MODERADO	FALSE						FALSE	FALSE	FALSE	FALSE	FALSE	TRUE	FALSE	TRUE	0	FALSE	FALSE	FALSE	FALSE	1050.58	72.354	101.243	57.5271	0.0775712	-3.5836	248	57.0067	1.49251	-3.70784	384	56.1652	3.8085	0.543174	183	51.6514	0.737592
PV148_Serie1	143	1	F	47	Bachelor	DIESTRO	2017-07-25	60-85	158-185	24-30	TRUE	LEVE	SEDENTARIO	TRUE		A	E	2	Sporadic	TRUE	FALSE	FALSE	FALSE	FALSE	FALSE	FALSE	TRUE	0	FALSE	FALSE	FALSE	TRUE	822.131	31.1413	75.5276	52.7254	-9.66252	2.37254	629	51.4393	-7.99121	1.66746	741	50.4052	-8.88065	1.67199	515	48.9623	-8.82948
PV148_Serie2	143	2	F	47	Bachelor	DIESTRO	2017-07-25	60-85	158-185	24-30	TRUE	LEVE	SEDENTARIO	TRUE		A	E	2	Sporadic	TRUE	FALSE	FALSE	FALSE	FALSE	FALSE	FALSE	TRUE	0	FALSE	FALSE	FALSE	TRUE	831.963	30.4525	73.338	53.2393	-7.43115	2.52695	183	51.4888	-7.28449	1.34918	59	50.4869	-6.39713	2.82872	521	50.4287	-5.31131
PV149_Serie1	149	1	F	<30	University studies	DIESTRO	2017-11-06	60-85	158-185	24-30	TRUE	MODERADO	SEDENTARIO	TRUE		E	B	1	Frequent	TRUE	FALSE	FALSE	FALSE	FALSE	FALSE	FALSE	TRUE	0	FALSE	FALSE	FALSE	TRUE	750.311	20.148	79.4432	41.1578	-4.15048	-3.06921	530	37.5503	-2.1045	-2.42297	373	36.433	-3.08126	-3.37803	705	35.9706	-2.50702
PV149_Serie2	149	2	F	<30	University studies	DIESTRO	2017-11-06	60-85	158-185	24-30	TRUE	MODERADO	SEDENTARIO	TRUE		E	B	1	Frequent	TRUE	FALSE	FALSE	FALSE	FALSE	FALSE	FALSE	TRUE	0	FALSE	FALSE	FALSE	TRUE	1033.77	28.4316	96.3998	53.3575	0.731435	2.42569	530	51.434	0.941325	2.7987	353	50.447	0.699927	2.1439	844	47.8244	2.09783
PV150_Serie1	150	1	F	30-55	High school	DIESTRO	2017-11-06	60-85	158-185	24-30	TRUE	MODERADO	MUY PESADO	FALSE	<180			0	Sporadic	TRUE	FALSE	FALSE	FALSE	FALSE	FALSE	FALSE	FALSE	0	TRUE	TRUE	FALSE	TRUE	1299.96	44.5803	114.387	79.0496	6.01353	-4.80772	90	78.1306	5.76652	-2.15983	334	77.8262	7.04311	-5.16085	452	77.4125	5.77375
PV150_Serie2	150	2	F	30-55	High school	DIESTRO	2017-11-06	60-85	158-185	24-30	TRUE	MODERADO	MUY PESADO	FALSE	<180			0	Sporadic	TRUE	FALSE	FALSE	FALSE	FALSE	FALSE	FALSE	FALSE	0	TRUE	TRUE	FALSE	TRUE	1302.52	52.3522	110.57	81.0703	6.32157	-2.85598	564	80.657	0.643514	-5.38216	141	80.6448	-2.12866	-4.27461	459	80.3817	-1.50227
PV151_Serie1	151	1	F	30-55	Bachelor	DIESTRO	2017-11-06	60-85	<158	24-30	FALSE	LEVE	SEDENTARIO	TRUE	>365	E	E	2	Frequent	FALSE	FALSE	FALSE	FALSE	FALSE	FALSE	FALSE	FALSE	0	FALSE	TRUE	TRUE	TRUE	1008.82	24.3912	89.8008	57.0982	-4.71774	1.41423	723	56.613	-3.11347	1.58487	873	56.5451	-2.60187	1.80687	544	56.3726	-2.83353
PV151_Serie2	151	2	F	30-55	Bachelor	DIESTRO	2017-11-06	60-85	<158	24-30	FALSE	LEVE	SEDENTARIO	TRUE	>365	E	E	2	Frequent	FALSE	FALSE	FALSE	FALSE	FALSE	FALSE	FALSE	FALSE	0	FALSE	TRUE	TRUE	TRUE	932.961	39.4654	84.6324	58.9939	-3.56718	-1.81279	261	57.2644	-8.3424	-3.94687	551	56.6997	-5.49781	-3.9002	158	55.0266	-8.76561
PV152_Serie1	152	1	M	30-55	University studies	DIESTRO	2017-11-21	>85	>185	24-30	FALSE	LEVE	SEDENTARIO	TRUE	<180	E	C	0	Frequent	FALSE	FALSE	FALSE	FALSE	FALSE	FALSE	FALSE	FALSE	0	FALSE	FALSE	FALSE	FALSE	551.199	24.476	61.351	43.8761	9.41989	9.21532	76	40.7286	12.1375	11.4807	287	40.2242	10.38	10.9593	180	38.5161	13.0022
PV152_Serie2	152	2	M	30-55	University studies	DIESTRO	2017-11-21	>85	>185	24-30	FALSE	LEVE	SEDENTARIO	TRUE	<180	E	C	0	Frequent	FALSE	FALSE	FALSE	FALSE	FALSE	FALSE	FALSE	FALSE	0	FALSE	FALSE	FALSE	FALSE	646.674	36.5766	66.1519	53.3177	19.4006	12.2394	192	51.9304	20.8757	14.1213	341	48.9188	21.1218	16.8291	412	45.201	15.6324
PV153_Serie1	153	1	M	30-55	University studies	DIESTRO	2017-11-21	60-85	158-185	24-30	TRUE	LEVE	SEDENTARIO	FALSE	<180	E	C	0	Sporadic	TRUE	FALSE	FALSE	FALSE	FALSE	FALSE	FALSE	TRUE	0	FALSE	FALSE	FALSE	TRUE	1021.33	45.923	99.2527	62.075	8.41333	7.12208	153	62.0081	7.74187	7.35108	55	57.8017	9.29224	8.83425	252	55.1888	7.81989
PV153_Serie2	153	2	M	30-55	University studies	DIESTRO	2017-11-21	60-85	158-185	24-30	TRUE	LEVE	SEDENTARIO	FALSE	<180	E	C	0	Sporadic	TRUE	FALSE	FALSE	FALSE	FALSE	FALSE	FALSE	TRUE	0	FALSE	FALSE	FALSE	TRUE	852.405	34.9346	81.1135	53.058	-6.73447	-9.64672	239	52.1749	-5.55522	-9.58989	142	50.0945	-5.21839	-9.52038	52	46.7754	-9.96174
PV154_Serie1	154	1	M	30-55	Bachelor	DIESTRO	2017-11-21	60-85	158-185	24-30	TRUE	INTENSO	DE PIE	TRUE	<180	D	E	1	Frequent	TRUE	FALSE	FALSE	FALSE	FALSE	FALSE	FALSE	TRUE	0	FALSE	FALSE	TRUE	TRUE	1060.92	40.5549	93.1523	46.8817	7.50033	7.32164	271	46.381	8.95969	9.53112	384	45.9755	10.3367	10.3734	481	45.4239	10.5702
PV154_Serie2	154	2	M	30-55	Bachelor	DIESTRO	2017-11-21	60-85	158-185	24-30	TRUE	INTENSO	DE PIE	TRUE	<180	D	E	1	Frequent	TRUE	FALSE	FALSE	FALSE	FALSE	FALSE	FALSE	TRUE	0	FALSE	FALSE	TRUE	TRUE	944.206	47.8807	91.8685	42.6268	9.19923	-2.39258	328	42.4233	7.4557	-2.00361	239	40.8552	5.98834	-2.30942	145	39.0459	7.70586
[truncated: 179 more columns]

## Sheet: Data_View_NumericalCode
Patient Characterisation Data														Clinical Data: Assessed and Reported Data																			(Rx= Flexo-Extension; Ry= Rotation; Rz= Lateralization)					Clinical Data: Measured Data With Sensors
	Identification						Temporary	Anthropometric			Daily Life Activities
	ID	Series	Gender	Age	Educational Level	Dominant Size	Date	Weight	Height	BMI	Physical Activity	Physical Activity Intensity	Workplace Intensity	Traffic Accident	Time Since Traffic Accident	Type of Scope	Head Position Scope	Time since Pain	Pain Periodicity	Paravertebral Pain	Surgery	Rheumatic Disease	SHORT Neck	Spurling	Distraction	Valsalva	Jackson Compression	Scale WDQ	Spinal Column Alterations	Feeling of Instability	Limitation of Mobility	Contracture	Rx.01.Length	Rx.02.Vel	Rx.03.MaxRange	1º Max. Rx	Acoplado Rz	Acoplado Ry	Frame	2º Max. Rx	Acoplado Rz	Acoplado Ry	Frame	3º Max. Rx	Acoplado Rz	Acoplado Ry	Frame	4º Max. Rx	Acoplado Rz
PV001_Serie1	1	1	F	1	2	DIESTRO	2017-04-19	0	1	0	FALSE	0	1	FALSE						FALSE	FALSE	FALSE	FALSE	FALSE	FALSE	FALSE	FALSE	0	FALSE	FALSE	FALSE	FALSE	1553.73	73.0137	136.088	76.4013	-0.189129	-5.38368	244	74.9311	4.66077	-1.89362	423	73.3684	0.667532	-2.80838	155	72.6113	1.71383
PV001_Serie2	1	2	F	1	2	DIESTRO	2017-04-19	0	1	0	FALSE	0	1	FALSE						FALSE	FALSE	FALSE	FALSE	FALSE	FALSE	FALSE	FALSE	0	FALSE	FALSE	FALSE	FALSE	1347.92	84.2452	129.752	73.7302	-1.90877	-3.79424	121	73.3793	-0.604915	-4.79812	47	72.2458	1.15756	-3.44119	198	69.8514	2.82323
PV002_Serie1	2	1	F	0	2	DIESTRO	2017-04-19	0	1	0	TRUE	1	1	FALSE				2	2	FALSE	FALSE	FALSE	FALSE	FALSE	FALSE	FALSE	FALSE	0	FALSE	FALSE	FALSE	FALSE	1581.68	69.1296	135.135	82.9657	10.4227	-9.00143	55	82.7574	9.04938	-4.20595	428	82.5559	9.43272	-7.56559	627	81.2439	13.7403
PV002_Serie2	2	2	F	0	2	DIESTRO	2017-04-19	0	1	0	TRUE	1	1	FALSE				2	2	FALSE	FALSE	FALSE	FALSE	FALSE	FALSE	FALSE	FALSE	0	FALSE	FALSE	FALSE	FALSE	1637.89	77.5518	139.416	81.6892	13.4468	-4.62368	399	81.617	11.3162	-4.80377	218	81.4126	7.32755	-7.07728	52	81.1982	13.8061
PV003_Serie1	3	1	F	1	2	DIESTRO	2017-04-20	0	1	0	FALSE	0	1	FALSE				2	2	FALSE	FALSE	FALSE	FALSE	FALSE	FALSE	FALSE	FALSE	0	FALSE	FALSE	TRUE	FALSE	1456.27	41.3713	127.418	66.8491	-3.47065	-1.58179	832	65.0846	-6.22486	-1.79429	418	64.6338	-5.35415	-2.29151	266	64.5918	-4.76915
PV003_Serie2	3	2	F	1	2	DIESTRO	2017-04-20	0	1	0	FALSE	0	1	FALSE				2	2	FALSE	FALSE	FALSE	FALSE	FALSE	FALSE	FALSE	FALSE	0	FALSE	FALSE	TRUE	FALSE	1396.32	42.5187	124.034	69.3839	-5.54654	-2.11921	484	68.1798	-5.34356	-2.89489	895	67.2031	-6.2203	-2.7198	612	66.4154	-4.89954
PV004_Serie1	4	1	F	1	2	DIESTRO	2017-04-21	1	1	1	TRUE	1	1	FALSE						TRUE	FALSE	FALSE	FALSE	FALSE	FALSE	FALSE	TRUE	1	FALSE	FALSE	FALSE	FALSE	1387.79	35.9903	118.949	73.3373	-2.77259	-6.73336	1043	72.5936	-4.65001	-5.31996	904	71.8484	-3.60579	-4.22217	300	71.7532	-4.72608
PV004_Serie2	4	2	F	1	2	DIESTRO	2017-04-21	1	1	1	TRUE	1	1	FALSE						TRUE	FALSE	FALSE	FALSE	FALSE	FALSE	FALSE	TRUE	1	FALSE	FALSE	FALSE	FALSE	1400.28	46.0619	119.412	71.6467	-1.43266	-1.04164	845	71.1581	-2.29372	-2.75151	724	69.8731	-4.63221	-0.236504	358	69.6553	-2.93143
PV005_Serie1	5	1	F	1	2	DIESTRO	2017-04-21	0	0	0	FALSE	0	0	FALSE				2	1	TRUE	FALSE	FALSE	FALSE	FALSE	FALSE	FALSE	FALSE	2	FALSE	FALSE	FALSE	TRUE	1609.8	61.1627	138.915	67.7001	-0.863922	-4.63041	57	67.0734	2.39866	-4.62523	158	64.6482	1.63204	-3.39839	389	63.5588	0.772023
PV005_Serie2	5	2	F	1	2	DIESTRO	2017-04-21	0	0	0	FALSE	0	0	FALSE				2	1	TRUE	FALSE	FALSE	FALSE	FALSE	FALSE	FALSE	FALSE	2	FALSE	FALSE	FALSE	TRUE	1632.75	52.1312	142.237	71.308	0.377523	-4.86903	191	69.082	-1.43806	-6.249	54	68.3641	-1.09373	-4.43293	837	66.9797	-2.60318
PV006_Serie1	6	1	F	1	1	DIESTRO	2017-04-21	0	1	0	FALSE	0	1	TRUE	1	E	D	0	2	TRUE	FALSE	FALSE	FALSE	FALSE	FALSE	FALSE	FALSE	3	FALSE	FALSE	TRUE	TRUE	1074.52	80.9123	108.357	68.3863	-3.59499	-5.42263	115	63.2477	-2.80825	-5.73946	181	59.9054	-3.4858	-6.20427	355	58.4108	1.44678
PV006_Serie2	6	2	F	1	1	DIESTRO	2017-04-21	0	1	0	FALSE	0	1	TRUE	1	E	D	0	2	TRUE	FALSE	FALSE	FALSE	FALSE	FALSE	FALSE	FALSE	3	FALSE	FALSE	TRUE	TRUE	1120.46	104.912	119.439	65.6278	3.08136	-1.74973	100	63.4726	5.59469	-0.954092	195	61.7867	7.13287	-1.58215	147	61.1589	0.587608
PV007_Serie1	7	1	M	0	2	DIESTRO	2017-04-21	2	1	1	TRUE	1	1	FALSE						FALSE	FALSE	FALSE	FALSE	FALSE	FALSE	FALSE	FALSE	0	FALSE	FALSE	FALSE	TRUE	1646.02	62.9213	141.604	67.9902	2.69254	-1.33498	592	66.5242	1.99368	-5.08859	729	65.6665	0.102133	-6.8457	377	65.0148	1.79501
PV007_Serie2	7	2	M	0	2	DIESTRO	2017-04-21	2	1	1	TRUE	1	1	FALSE						FALSE	FALSE	FALSE	FALSE	FALSE	FALSE	FALSE	FALSE	0	FALSE	FALSE	FALSE	TRUE	1592.48	67.2501	137.215	64.7627	4.29718	-3.27633	460	64.2268	9.47425	2.20613	151	62.5682	5.19576	-4.18435	359	62.1186	2.91391
PV008_Serie1	8	1	F	1	2	DIESTRO	2017-04-25	0	1	0	FALSE	0		TRUE	1	B	C	2	2	FALSE	FALSE	FALSE	FALSE	FALSE	FALSE	FALSE	FALSE	2	FALSE	FALSE	FALSE	FALSE	1234.41	74.1832	115.95	60.8108	2.16844	-0.678045	283	59.6624	2.72856	2.10191	361	59.4114	0.0731882	-1.7467	52	59.2068	2.11249
PV008_Serie2	8	2	F	1	2	DIESTRO	2017-04-25	0	1	0	FALSE	0		TRUE	1	B	C	2	2	FALSE	FALSE	FALSE	FALSE	FALSE	FALSE	FALSE	FALSE	2	FALSE	FALSE	FALSE	FALSE	1241.53	89.9658	117.22	59.3988	-0.131608	-3.24286	301	58.7888	0.810593	0.419588	111	58.7111	2.26975	-2.31105	178	58.2879	3.57218
PV009_Serie1	9	1	F	1	2	DIESTRO	2017-04-25	1	1	1	FALSE	0	1	TRUE	3	B	C	2	0	TRUE	FALSE	FALSE	FALSE	FALSE	FALSE	FALSE	FALSE	1	FALSE	TRUE	FALSE	TRUE	1164.01	34.9764	106.177	55.3862	-0.639791	0.153346	79	53.0689	-2.00393	0.26829	237	52.5545	-3.22997	-2.27029	649	51.1062	-4.76995
PV009_Serie2	9	2	F	1	2	DIESTRO	2017-04-25	1	1	1	FALSE	0	1	TRUE	3	B	C	2	0	TRUE	FALSE	FALSE	FALSE	FALSE	FALSE	FALSE	FALSE	1	FALSE	TRUE	FALSE	TRUE	1125.69	31.444	102.717	54.4285	-4.34505	-4.50564	78	53.0887	-5.75507	-6.17577	824	51.6843	-6.71864	-6.30587	973	51.2988	-3.50767
PV010_Serie1	10	1	F	1	0	DIESTRO	2017-04-26	2	1	2	FALSE	0	2	FALSE				2	2	TRUE	FALSE	FALSE	FALSE	FALSE	FALSE	FALSE	FALSE	1	TRUE	TRUE	FALSE	TRUE	957.872	51.8329	93.0461	48.7939	1.86036	-4.57609	482	45.5453	2.42039	-4.37281	316	45.4453	2.7336	-4.38717	395	44.522	3.23758
PV010_Serie2	10	2	F	1	0	DIESTRO	2017-04-26	2	1	2	FALSE	0	2	FALSE				2	2	TRUE	FALSE	FALSE	FALSE	FALSE	FALSE	FALSE	FALSE	1	TRUE	TRUE	FALSE	TRUE	913.574	49.7589	87.9236	44.3739	4.92664	-3.19895	272	44.1824	3.20347	-4.7493	354	44.0235	5.28122	-2.75355	437	42.0159	4.55405
PV011_Serie1	11	1	F	1	1	DIESTRO	2017-05-26	1	1	0	TRUE	1	0	FALSE						TRUE	FALSE	FALSE	FALSE	FALSE	FALSE	FALSE	FALSE	1	FALSE	FALSE	FALSE	FALSE	897.392	38.9493	84.3635	40.8689	0.568325	0.0721552	607	39.8723	0.287426	-0.782758	510	39.8033	-0.726412	-2.50752	84	39.4546	0.364662
PV011_Serie2	11	2	F	1	1	DIESTRO	2017-05-26	1	1	0	TRUE	1	0	FALSE						TRUE	FALSE	FALSE	FALSE	FALSE	FALSE	FALSE	FALSE	1	FALSE	FALSE	FALSE	FALSE	820.051	53.3887	80.1779	45.1655	4.72286	-2.24639	401	43.1781	4.78273	-1.82315	330	41.8602	3.71804	-0.44278	189	41.8373	4.6529
PV012_Serie1	12	1	F	1	2	DIESTRO	2017-04-26	0	1	0	TRUE	1	0	FALSE						FALSE	FALSE	FALSE	FALSE	FALSE	FALSE	FALSE	FALSE	1	FALSE	FALSE	FALSE	FALSE	1528.46	57.6341	133.081	68.0603	-1.72817	-3.53011	736	67.6138	-2.70749	-4.17218	403	67.2105	-5.21121	-1.0793	509	66.6072	-0.243631
PV012_Serie2	12	2	F	1	2	DIESTRO	2017-04-26	0	1	0	TRUE	1	0	FALSE						FALSE	FALSE	FALSE	FALSE	FALSE	FALSE	FALSE	FALSE	1	FALSE	FALSE	FALSE	FALSE	1453.84	56.9688	127.054	71.15	-3.38863	-5.00848	272	71.13	-2.6944	-4.3043	692	70.6988	-5.38244	-5.98016	160	70.1361	-4.59788
PV013_Serie1	13	1	F	0	1	DIESTRO	2017-04-28	0	0	1	FALSE	0	1	FALSE						FALSE	FALSE	FALSE	FALSE	FALSE	FALSE	FALSE	FALSE	2	FALSE	FALSE	FALSE	FALSE	1193.72	54.4579	105.019	51.925	3.17936	-2.02355	363	51.242	-2.09707	-2.09187	454	50.194	-1.4847	-3.02968	623	49.8101	-1.08795
PV013_Serie2	13	2	F	0	1	DIESTRO	2017-04-28	0	0	1	FALSE	0	1	FALSE						FALSE	FALSE	FALSE	FALSE	FALSE	FALSE	FALSE	FALSE	2	FALSE	FALSE	FALSE	FALSE	994.069	48.5385	93.3918	54.7337	-1.7829	-4.66745	253	50.0557	0.177457	-4.21041	167	49.7851	1.89699	-3.3118	330	49.4657	-0.423764
PV014_Serie1	80	1	F	1	1	DIESTRO	2017-06-06	0	1	0	TRUE	2	1	FALSE						FALSE	FALSE	FALSE	FALSE	FALSE	FALSE	FALSE	FALSE	1	FALSE	FALSE	FALSE	TRUE	1120.12	58.9535	103.51	60.9237	1.38422	1.43219	221	57.3428	1.04439	-0.7482	139	57.0719	0.170315	0.489118	302	56.2876	5.12933
PV014_Serie2	80	2	F	1	1	DIESTRO	2017-06-06	0	1	0	TRUE	2	1	FALSE						FALSE	FALSE	FALSE	FALSE	FALSE	FALSE	FALSE	FALSE	1	FALSE	FALSE	FALSE	TRUE	1363.25	56.8971	118.057	64.9419	-0.948898	-0.189647	190	64.3988	-2.00328	-0.563615	391	64.3962	-1.66645	-0.742539	295	64.3171	-2.46475
PV015_Serie1	15	1	F	1	0	DIESTRO	2017-05-28	0	0	0	TRUE	0	2	TRUE	3	F	C	2	2	TRUE	FALSE	FALSE	FALSE	FALSE	FALSE	FALSE	TRUE	1	TRUE	FALSE	TRUE	TRUE	1117.36	33.2944	103.275	57.9642	-1.2295	-0.402121	893	54.975	-0.267523	-0.340022	762	54.0904	-0.403337	-0.680072	631	51.309	0.136214
PV015_Serie2	15	2	F	1	0	DIESTRO	2017-05-28	0	0	0	TRUE	0	2	TRUE	3	F	C	2	2	TRUE	FALSE	FALSE	FALSE	FALSE	FALSE	FALSE	TRUE	1	TRUE	FALSE	TRUE	TRUE	1118.83	50.3071	104.25	62.6104	1.32617	1.13209	430	59.7602	-0.37499	-0.258558	340	56.4861	1.14615	0.714081	520	53.8276	0.421482
PV016_Serie1	16	1	F	1	2	DIESTRO	2017-04-28	0	1	0	TRUE	0	1	FALSE				2	2	FALSE	FALSE	FALSE	FALSE	FALSE	FALSE	FALSE	FALSE	3	FALSE	TRUE	TRUE	FALSE	873.652	28.2918	76.6436	49.1716	-3.59187	-5.10614	729	47.9467	-3.73547	-6.85705	608	47.9441	-3.87102	-6.8506	839	46.7204	-3.01869
PV016_Serie2	16	2	F	1	2	DIESTRO	2017-04-28	0	1	0	TRUE	0	1	FALSE				2	2	FALSE	FALSE	FALSE	FALSE	FALSE	FALSE	FALSE	FALSE	3	FALSE	TRUE	TRUE	FALSE	703.652	20.1504	66.3051	45.6654	-0.993945	-3.03379	606	45.4969	1.48486	-2.76704	97	43.2485	-0.660478	-2.57018	466	42.6322	-1.24731
PV017_Serie1	17	1	F	0	2	DIESTRO	2017-05-02	1	0	1	FALSE	0	1	FALSE						FALSE	FALSE	FALSE	FALSE	FALSE	FALSE	FALSE	FALSE	0	FALSE	FALSE	FALSE	FALSE	1673.76	78.3596	145.926	83.0947	10.1411	-0.678047	614	82.4374	7.8021	-4.8244	351	81.6248	10.5592	-1.29211	525	81.3357	12.2104
PV017_Serie2	17	2	F	0	2	DIESTRO	2017-05-02	1	0	1	FALSE	0	1	FALSE						FALSE	FALSE	FALSE	FALSE	FALSE	FALSE	FALSE	FALSE	0	FALSE	FALSE	FALSE	FALSE	1501.85	98.8061	141.252	89.7564	4.46656	-0.0696812	397	87.8107	5.31229	-0.851288	195	87.759	2.97097	1.48268	264	86.1738	6.16948
PV018_Serie1	18	1	M	2	0	DIESTRO	2017-05-02	1	0	1	TRUE	1	1	FALSE				0	2	TRUE	FALSE	FALSE	FALSE	FALSE	FALSE	FALSE	FALSE	1	TRUE	TRUE	FALSE	TRUE	1047.28	52.5742	98.8551	56.2766	9.23252	-3.41624	262	54.1292	8.13848	-3.30754	353	53.7625	8.68802	-3.87005	69	53.4116	8.88302
PV018_Serie2	18	2	M	2	0	DIESTRO	2017-05-02	1	0	1	TRUE	1	1	FALSE				0	2	TRUE	FALSE	FALSE	FALSE	FALSE	FALSE	FALSE	FALSE	1	TRUE	TRUE	FALSE	TRUE	802.65	52.3923	79.3416	44.5028	4.82022	-1.20187	402	41.9983	5.63588	-0.464207	336	39.397	3.73372	-0.391889	271	39.0721	2.37738
PV019_Serie1	19	1	F	0	2	DIESTRO	2017-05-02	1	1	1	TRUE	1	1	FALSE						FALSE	FALSE	FALSE	FALSE	FALSE	FALSE	FALSE	FALSE	0	FALSE	FALSE	FALSE	FALSE	1330.44	36.7119	114.446	63.6929	-4.06202	-5.28201	400	62.9464	-5.02949	-8.71663	564	61.8732	-3.61196	-5.42356	989	61.8246	-2.77727
PV019_Serie2	19	2	F	0	2	DIESTRO	2017-05-02	1	1	1	TRUE	1	1	FALSE						FALSE	FALSE	FALSE	FALSE	FALSE	FALSE	FALSE	FALSE	0	FALSE	FALSE	FALSE	FALSE	1415.11	40.5243	125.099	70.5006	5.06427	-4.68793	91	67.3681	3.79162	-2.63962	253	67.2059	-4.21269	-5.11083	964	66.8915	-1.11764
PV020_Serie1	20	1	M	1	2	DIESTRO	2017-05-03	1	1	1	TRUE	1	0	FALSE						FALSE	FALSE	FALSE	FALSE	FALSE	FALSE	FALSE	FALSE	0	FALSE	FALSE	FALSE	FALSE	1208.82	40.7283	105.458	64.2788	2.24232	-0.967523	808	63.7387	0.153005	-0.841905	703	63.6997	-0.0519457	-1.78433	339	63.6935	-1.16875
PV020_Serie2	20	2	M	1	2	DIESTRO	2017-05-03	1	1	1	TRUE	1	0	FALSE						FALSE	FALSE	FALSE	FALSE	FALSE	FALSE	FALSE	FALSE	0	FALSE	FALSE	FALSE	FALSE	1105.82	40.2997	95.6867	59.4439	-1.48218	-3.65932	67	58.8731	1.13157	-0.136972	641	58.3298	1.06323	-3.13004	305	58.1438	-0.0824964
PV021_Serie1	21	1	F	1	1	AMBIDIESTRO	2017-05-03	1	1	0	TRUE	0	0	TRUE	2	E		2	0	FALSE	FALSE	FALSE	FALSE	FALSE	FALSE	FALSE	FALSE	0	FALSE	FALSE	FALSE	FALSE	1088.58	49.0351	114.297	52.0228	5.50825	1.55137	75	44.4256	4.7675	-0.197024	168	42.5293	3.44417	0.163901	381	40.9526	5.17005
PV021_Serie2	21	2	F	1	1	AMBIDIESTRO	2017-05-03	1	1	0	TRUE	0	0	TRUE	2	E		2	0	FALSE	FALSE	FALSE	FALSE	FALSE	FALSE	FALSE	FALSE	0	FALSE	FALSE	FALSE	FALSE	1075.05	51.3888	105.727	38.4192	4.02428	-3.16045	271	36.9866	6.48272	-2.69338	366	35.6869	7.10925	-2.31587	167	34.9463	7.61442
PV022_Serie1	22	1	F	1	2	DIESTRO	2017-05-03	1	1	1	TRUE	1	2	TRUE	1	B	D	2	2	TRUE	FALSE	FALSE	FALSE	FALSE	FALSE	FALSE	FALSE	3	TRUE	TRUE	TRUE	TRUE	1242.67	53.9352	110.378	50.7024	5.20603	-0.44794	447	50.4172	2.91637	-0.137793	76	48.6073	5.41643	-0.76302	357	48.1987	8.39291
PV022_Serie2	22	2	F	1	2	DIESTRO	2017-05-03	1	1	1	TRUE	1	2	TRUE	1	B	D	2	2	TRUE	FALSE	FALSE	FALSE	FALSE	FALSE	FALSE	FALSE	3	TRUE	TRUE	TRUE	TRUE	1265.04	41.7228	108.839	51.0298	-1.23036	-5.15837	821	50.1854	2.30899	-4.28153	314	49.4555	2.58611	-2.90629	63	49.2115	-0.566936
PV023_Serie1	23	1	F	2	2	ZURDO	2017-05-03	0	0	0	FALSE	0	2	FALSE				0	2	TRUE	FALSE	FALSE	FALSE	TRUE	FALSE	FALSE	TRUE	3	FALSE	FALSE	TRUE	TRUE	558.412	18.9164	58.1804	30.3613	5.64758	-3.14768	235	26.7331	5.01121	-4.16594	385	26.102	5.52468	-2.91632	638	26.0749	4.47933
PV023_Serie2	23	2	F	2	2	ZURDO	2017-05-03	0	0	0	FALSE	0	2	FALSE				0	2	TRUE	FALSE	FALSE	FALSE	TRUE	FALSE	FALSE	TRUE	3	FALSE	FALSE	TRUE	TRUE	493.722	23.9671	50.8502	32.0379	5.38528	-2.71997	454	28.2138	5.19957	-3.74986	275	27.2663	5.54695	-1.34258	72	26.8389	5.17395
PV024_Serie1	24	1	F	1	1	DIESTRO	2017-05-03	0	0	0	TRUE	1	1	FALSE				2	2	TRUE	FALSE	FALSE	FALSE	TRUE	FALSE	FALSE	FALSE	1	TRUE	TRUE	TRUE	TRUE	966.253	13.4351	79.7261	44.5407	7.11475	0.297634	329	43.9485	5.6539	-1.28174	907	41.0155	7.97718	0.955927	662	41.0041	6.1724
PV024_Serie2	24	2	F	1	1	DIESTRO	2017-05-03	0	0	0	TRUE	1	1	FALSE				2	2	TRUE	FALSE	FALSE	FALSE	TRUE	FALSE	FALSE	FALSE	1	TRUE	TRUE	TRUE	TRUE	792.087	11.0073	70.2699	44.1314	3.07602	0.978958	1108	43.6116	5.10101	0.700533	489	42.9341	3.24006	0.251839	801	40.1059	2.1301
PV025_Serie1	25	1	M	1	2	DIESTRO	2017-05-05	1	1	0	FALSE	0	0	FALSE				2	2	FALSE	FALSE	FALSE	FALSE	FALSE	FALSE	FALSE	FALSE	2	FALSE	FALSE	FALSE	TRUE	1291.91	45.0458	112.604	58.7613	-0.860776	-1.534	672	56.9329	-0.761844	-1.03003	783	56.7199	0.27528	0.616115	558	54.8381	-0.122054
PV025_Serie2	25	2	M	1	2	DIESTRO	2017-05-05	1	1	0	FALSE	0	0	FALSE				2	2	FALSE	FALSE	FALSE	FALSE	FALSE	FALSE	FALSE	FALSE	2	FALSE	FALSE	FALSE	TRUE	1215.16	37.5514	108.359	58.3139	-6.03332	3.27721	388	56.1531	-4.68631	1.31378	886	53.9988	-3.76925	2.88921	769	53.7572	-3.81617
PV026_Serie1	26	1	F	1	2	DIESTRO	2017-05-05	0	1	0	TRUE	0	1	FALSE						FALSE	FALSE	FALSE	FALSE	FALSE	FALSE	FALSE	FALSE	0	FALSE	FALSE	FALSE	FALSE	1535.39	72.0162	132.301	75.5497	4.87775	4.00215	71	74.997	2.06491	3.16691	266	74.7645	1.85964	3.83071	523	74.682	2.03716
PV026_Serie2	26	2	F	1	2	DIESTRO	2017-05-05	0	1	0	TRUE	0	1	FALSE						FALSE	FALSE	FALSE	FALSE	FALSE	FALSE	FALSE	FALSE	0	FALSE	FALSE	FALSE	FALSE	1501.9	76.9414	130.45	77.0164	-0.163341	1.85506	482	76.565	-2.26294	-0.331773	329	76.0487	-0.606012	0.0556157	248	75.6768	-0.305572
PV027_Serie1	27	1	F	1	1	DIESTRO	2017-05-05	1	1	1	TRUE	0	0	FALSE						FALSE	FALSE	FALSE	FALSE	FALSE	FALSE	FALSE	FALSE	0	FALSE	FALSE	FALSE	FALSE	1343.79	49.187	114.713	54.2501	1.3983	1.85637	96	53.7211	4.47881	1.6753	560	53.6224	5.67241	3.06665	667	52.9808	5.10406
PV027_Serie2	27	2	F	1	1	DIESTRO	2017-05-05	1	1	1	TRUE	0	0	FALSE						FALSE	FALSE	FALSE	FALSE	FALSE	FALSE	FALSE	FALSE	0	FALSE	FALSE	FALSE	FALSE	1146.57	55.4433	102.207	48.0617	1.08883	0.888827	54	47.7986	4.43507	3.01088	571	47.2638	-0.556965	1.03239	247	46.741	-0.258089
PV028_Serie1	28	1	F	1	1	DIESTRO	2017-05-05	1	1	1	TRUE	1	1	FALSE				2	2	TRUE	FALSE	FALSE	FALSE	FALSE	FALSE	FALSE	FALSE	1	FALSE	FALSE	FALSE	TRUE	1147.01	54.7235	103.079	50.8166	-3.40749	-3.98654	572	49.937	-0.863898	-1.99032	216	49.0443	-1.33144	-1.97732	308	47.8294	-2.15646
PV028_Serie2	28	2	F	1	1	DIESTRO	2017-05-05	1	1	1	TRUE	1	1	FALSE				2	2	TRUE	FALSE	FALSE	FALSE	FALSE	FALSE	FALSE	FALSE	1	FALSE	FALSE	FALSE	TRUE	1006.15	56.1466	97.2116	43.3903	-6.1614	1.34215	368	43.2117	-6.95269	-1.67014	450	41.6437	-5.06042	-3.76698	196	41.4911	-6.59275
PV029_Serie1	29	1	F	1	0	DIESTRO	2017-05-05	2	0	2	FALSE	0	2	FALSE				2	2	FALSE	FALSE	FALSE	FALSE	FALSE	FALSE	FALSE	TRUE	3	FALSE	FALSE	TRUE	TRUE	1148.75	61.894	111.525	53.6968	3.58761	5.19489	346	52.5241	2.47578	4.162	269	50.0995	4.21565	5.21093	425	48.618	1.57007
PV029_Serie2	29	2	F	1	0	DIESTRO	2017-05-05	2	0	2	FALSE	0	2	FALSE				2	2	FALSE	FALSE	FALSE	FALSE	FALSE	FALSE	FALSE	TRUE	3	FALSE	FALSE	TRUE	TRUE	1257.98	61.3053	111.219	58.3809	-0.451542	5.84527	589	57.4217	-2.30867	4.84078	258	57.2117	-0.790688	5.4132	342	55.5928	-0.202569
PV030_Serie1	30	1	F	2	2	DIESTRO	2017-05-09	1	1	0	TRUE	1	0	FALSE				2	0	FALSE	FALSE	FALSE	FALSE	FALSE	FALSE	FALSE	FALSE	2	FALSE	FALSE	FALSE	FALSE	1386.88	30.2812	118.384	59.761	-4.50288	-0.693002	499	59.3179	-5.06237	-1.65698	301	59.1905	-6.15949	-1.23565	686	58.7256	-5.39888
PV030_Serie2	30	2	F	2	2	DIESTRO	2017-05-09	1	1	0	TRUE	1	0	FALSE				2	0	FALSE	FALSE	FALSE	FALSE	FALSE	FALSE	FALSE	FALSE	2	FALSE	FALSE	FALSE	FALSE	1417.49	27.5134	120.707	57.9566	-1.55543	-0.788213	1395	57.1911	-1.26437	0.116206	1178	56.9097	-1.88142	-1.09742	332	56.6705	-3.83303
PV031_Serie1	31	1	M	1	2	DIESTRO	2017-05-10	1	1	1	TRUE	2	3	FALSE				2	2	FALSE	FALSE	FALSE	FALSE	FALSE	FALSE	FALSE	FALSE	1	FALSE	FALSE	FALSE	TRUE	1733.32	55.8414	137.956	61.5615	1.28847	-0.267264	621	60.373	2.11356	1.19848	505	60.1062	3.39009	0.0999281	257	59.4427	2.08252
PV031_Serie2	31	2	M	1	2	DIESTRO	2017-05-10	1	1	1	TRUE	2	3	FALSE				2	2	FALSE	FALSE	FALSE	FALSE	FALSE	FALSE	FALSE	FALSE	1	FALSE	FALSE	FALSE	TRUE	1625.03	43.4964	133.775	62.0781	2.61005	-0.561259	464	61.7321	3.41338	0.347997	616	61.448	0.696587	-0.271772	754	59.3134	1.84804
PV032_Serie1	32	1	M	1	2	DIESTRO	2017-05-10	1	1	0	FALSE	0	0	FALSE				2	0	TRUE	FALSE	FALSE	FALSE	FALSE	FALSE	FALSE	FALSE	1	FALSE	FALSE	TRUE	TRUE	1377.34	63.2967	119.049	56.6648	-1.94894	0.0816652	433	56.6172	-2.39364	0.408683	347	54.7801	-3.59515	0.44745	615	54.2898	-1.72109
PV032_Serie2	32	2	M	1	2	DIESTRO	2017-05-10	1	1	0	FALSE	0	0	FALSE				2	0	TRUE	FALSE	FALSE	FALSE	FALSE	FALSE	FALSE	FALSE	1	FALSE	FALSE	TRUE	TRUE	1195.83	66.2874	111.466	53.0751	-1.56236	-1.80081	400	52.3585	0.0775661	-0.849361	317	51.9075	0.391862	-2.20496	477	51.4908	0.191591
PV033_Serie1	33	1	F	2	1	DIESTRO	2017-05-10	2	1	2	FALSE	0	2	FALSE				2	2	FALSE	FALSE	FALSE	FALSE	FALSE	FALSE	FALSE	FALSE	1	FALSE	TRUE	TRUE	TRUE	1159.76	34.9746	100.874	56.7241	-5.42266	-2.51036	251	56.6939	-3.75872	-2.71232	402	56.0652	-5.81602	-2.37016	97	54.8733	-4.37085
PV033_Serie2	33	2	F	2	1	DIESTRO	2017-05-10	2	1	2	FALSE	0	2	FALSE				2	2	FALSE	FALSE	FALSE	FALSE	FALSE	FALSE	FALSE	FALSE	1	FALSE	TRUE	TRUE	TRUE	1194.7	28.8297	101.68	60.545	-9.38218	-3.10103	600	59.8057	-6.85578	-1.42603	422	59.6208	-8.15785	-2.01835	780	59.4585	-8.46415
PV034_Serie1	34	1	F	0	2		2017-05-10	0	1	0	TRUE	0	0	TRUE	3	E	C	2	2	TRUE	FALSE	FALSE	FALSE	FALSE	FALSE	FALSE	FALSE	2	TRUE	FALSE	FALSE	TRUE	1363.57	45.2111	118.567	62.29	-6.93733	-3.675	221	60.9199	-7.48955	-4.16925	717	60.4675	-7.10253	-4.9967	352	60.3224	-5.48579
PV034_Serie2	34	2	F	0	2		2017-05-10	0	1	0	TRUE	0	0	TRUE	3	E	C	2	2	TRUE	FALSE	FALSE	FALSE	FALSE	FALSE	FALSE	FALSE	2	TRUE	FALSE	FALSE	TRUE	1242.62	44.4428	111.433	66.8341	-4.81358	-4.02252	196	65.6243	-4.10431	-4.27232	555	64.6574	-3.84978	-5.40784	433	61.3536	-0.22444
PV035_Serie1	35	1	F	2	2	DIESTRO	2017-05-12	1	1	0	TRUE	1	1	TRUE	3	G	C	2	0	FALSE	FALSE	FALSE	FALSE	FALSE	FALSE	FALSE	FALSE	1	TRUE	FALSE	TRUE	TRUE	1144.9	73.2033	113.492	48.8304	3.62542	-2.25618	128	44.8629	-0.719432	-6.00025	63	40.9643	2.62666	-3.36529	201	40.1629	0.518745
PV035_Serie2	35	2	F	2	2	DIESTRO	2017-05-12	1	1	0	TRUE	1	1	TRUE	3	G	C	2	0	FALSE	FALSE	FALSE	FALSE	FALSE	FALSE	FALSE	FALSE	1	TRUE	FALSE	TRUE	TRUE	1237.22	78.5041	116.246	49.3314	4.12855	-1.29158	125	48.5319	2.89373	-2.2555	55	47.8632	2.77159	-0.761545	411	46.4259	4.22621
PV036_Serie1	130	1	F	0	0	DIESTRO	2017-07-14	2	1	2	FALSE	1	0	TRUE	1	E	A	0	2	FALSE	FALSE	FALSE	FALSE	FALSE	FALSE	FALSE	FALSE	2	FALSE	FALSE	FALSE	TRUE	1633.15	32.3013	137.81	62.8002	5.69382	-0.181054	348	62.5388	5.88605	-0.323269	117	61.7723	3.61905	-0.884904	571	61.5374	5.34775
PV036_Serie2	130	2	F	0	0	DIESTRO	2017-07-14	2	1	2	FALSE	1	0	TRUE	1	E	A	0	2	FALSE	FALSE	FALSE	FALSE	FALSE	FALSE	FALSE	FALSE	2	FALSE	FALSE	FALSE	TRUE	1612.97	35.6536	136.75	66.7774	2.7851	-2.53793	319	66.2555	4.89085	-0.618246	1236	65.8024	3.44756	-2.37186	695	64.917	3.77659
PV037_Serie1	131	1	F	1	1	DIESTRO	2017-07-17	1	1	1	TRUE	0	2	TRUE	3	E	C	2	0	FALSE	FALSE	FALSE	FALSE	TRUE	TRUE	FALSE	FALSE	1	FALSE	FALSE	FALSE	TRUE	1292.34	64.4882	116.295	60.2193	-4.54984	0.132983	576	57.505	-4.66467	-2.5283	168	56.5511	-4.23938	-1.71444	331	55.6861	-4.21042
PV037_Serie2	131	2	F	1	1	DIESTRO	2017-07-17	1	1	1	TRUE	0	2	TRUE	3	E	C	2	0	FALSE	FALSE	FALSE	FALSE	TRUE	TRUE	FALSE	FALSE	1	FALSE	FALSE	FALSE	TRUE	1149.75	55.813	113.676	61.7205	-5.34119	-0.999738	332	59.7078	-3.65212	0.228326	525	58.1279	-1.98596	-0.625889	432	57.839	-3.1141
PV038_Serie1	132	1	F	1	1	DIESTRO	2017-07-17	1	1	1	TRUE	0	1	FALSE				2	2	TRUE	FALSE	FALSE	FALSE	FALSE	FALSE	FALSE	FALSE	3	FALSE	TRUE	TRUE	TRUE	1388.48	80.3521	133.555	71.9292	-4.66044	-4.70433	357	68.9189	-2.58386	-5.53093	436	67.7694	-2.15612	-4.21826	207	65.4917	-3.35483
PV038_Serie2	132	2	F	1	1	DIESTRO	2017-07-17	1	1	1	TRUE	0	1	FALSE				2	2	TRUE	FALSE	FALSE	FALSE	FALSE	FALSE	FALSE	FALSE	3	FALSE	TRUE	TRUE	TRUE	1453.63	92.2352	130.577	73.369	-3.99994	-0.544008	180	72.2356	4.12055	-0.258668	444	71.1588	-1.45512	0.682582	311	69.6416	1.40074
PV039_Serie1	36	1	F	1	2	DIESTRO	2017-05-12	1	1	0	TRUE	0	1	FALSE						TRUE	FALSE	FALSE	FALSE	FALSE	FALSE	FALSE	FALSE	0	FALSE	FALSE	FALSE	FALSE	1276.7	33.5267	111.013	57.8143	-8.68156	0.814756	241	57.0395	-8.5828	1.68752	709	56.8256	-8.71944	2.07754	555	56.647	-10.2489
PV039_Serie2	36	2	F	1	2	DIESTRO	2017-05-12	1	1	0	TRUE	0	1	FALSE						TRUE	FALSE	FALSE	FALSE	FALSE	FALSE	FALSE	FALSE	0	FALSE	FALSE	FALSE	FALSE	1219.53	39.5437	105.81	59.513	-9.0751	3.09311	728	57.4096	-10.7953	2.59538	608	56.8307	-10.691	2.41902	487	56.3809	-10.0197
PV040_Serie1	37	1	F	1	0	DIESTRO	2017-05-12	2	1	2	FALSE	1	0	TRUE		E	C	2	2	FALSE	FALSE	FALSE	FALSE	FALSE	FALSE	FALSE	FALSE	1	FALSE	FALSE	FALSE	TRUE	1191.21	31.021	102.787	50.1126	-11.6775	2.76933	1044	48.5807	-10.0109	4.8343	84	48.2478	-9.93922	3.18037	720	48.0474	-9.68324
PV040_Serie2	37	2	F	1	0	DIESTRO	2017-05-12	2	1	2	FALSE	1	0	TRUE		E	C	2	2	FALSE	FALSE	FALSE	FALSE	FALSE	FALSE	FALSE	FALSE	1	FALSE	FALSE	FALSE	TRUE	1149.79	31.109	98.827	53.5815	-10.5572	1.44221	693	52.8692	-10.4626	3.39859	224	52.377	-10.2663	4.29573	87	51.2345	-10.8043
PV041_Serie1	41	1	F	0	2	DIESTRO	2017-05-16	1	1	0	TRUE	1	2	FALSE						FALSE	FALSE	FALSE	FALSE	FALSE	FALSE	FALSE	FALSE	0	FALSE	FALSE	FALSE	FALSE	1618.53	87.3935	139.572	63.3955	-3.41114	-1.17535	107	62.4038	0.156026	0.113463	492	61.9805	-2.12308	-0.783312	416	61.5378	-3.06113
PV041_Serie2	41	2	F	0	2	DIESTRO	2017-05-16	1	1	0	TRUE	1	2	FALSE						FALSE	FALSE	FALSE	FALSE	FALSE	FALSE	FALSE	FALSE	0	FALSE	FALSE	FALSE	FALSE	1663.12	86.441	144.306	60.8926	1.04695	1.20609	182	60.6385	0.784656	1.31957	351	59.4955	2.17837	2.34802	432	58.3383	1.47602
PV042_Serie1	42	1	M	1	1	DIESTRO	2017-05-16	2	1	2	TRUE	0	2	FALSE						FALSE	FALSE	FALSE	FALSE	FALSE	FALSE	FALSE	FALSE	0	TRUE	FALSE	FALSE	TRUE	1081.94	73.9028	100.669	46.6144	-3.63896	2.06374	184	46.4202	-2.21725	3.28047	50	45.7315	-2.09745	2.32983	118	45.2382	-1.45938
PV042_Serie2	42	2	M	1	1	DIESTRO	2017-05-16	2	1	2	TRUE	0	2	FALSE						FALSE	FALSE	FALSE	FALSE	FALSE	FALSE	FALSE	FALSE	0	TRUE	FALSE	FALSE	TRUE	967.739	58.1574	94.7131	43.931	-2.97778	1.35071	45	41.2649	-2.8333	0.603349	341	40.9689	-3.9775	-0.950275	416	40.1519	-3.03377
PV043_Serie1	43	1	F	2	0	DIESTRO	2017-05-17	0	1	0	TRUE	0	0	FALSE				2	2	TRUE	FALSE	FALSE	FALSE	TRUE	TRUE	FALSE	FALSE	3	FALSE	TRUE	TRUE	TRUE	667.446	20.0796	60.2251	39.0579	3.62972	-4.37763	393	38.6375	3.58028	-3.44367	925	38.5486	5.20274	-2.27839	790	37.2164	4.07072
PV043_Serie2	43	2	F	2	0	DIESTRO	2017-05-17	0	1	0	TRUE	0	0	FALSE				2	2	TRUE	FALSE	FALSE	FALSE	TRUE	TRUE	FALSE	FALSE	3	FALSE	TRUE	TRUE	TRUE	595.589	17.4967	54.3406	36.4136	2.96614	-2.98323	943	36.0944	2.34855	-3.46086	526	35.4074	3.20297	-2.81352	671	34.8814	2.5772
PV044_Serie1	44	1	F	0	1	AMBIDIESTRO	2017-05-17	1	1	0	FALSE	0	0	FALSE						FALSE	FALSE	FALSE	FALSE	FALSE	FALSE	FALSE	FALSE	1	FALSE	FALSE	FALSE	FALSE	1576.52	74.6456	136.025	58.9746	5.88412	-7.37823	142	58.2357	3.73479	-7.35024	498	57.432	6.53952	-8.70324	583	56.9849	5.81308
PV044_Serie2	44	2	F	0	1	AMBIDIESTRO	2017-05-17	1	1	0	FALSE	0	0	FALSE						FALSE	FALSE	FALSE	FALSE	FALSE	FALSE	FALSE	FALSE	1	FALSE	FALSE	FALSE	FALSE	1396.97	67.0332	133.396	56.1257	4.0409	-10.636	53	54.6425	6.15778	-4.51007	425	52.96	6.10132	-9.28899	329	52.8385	2.83014
PV045_Serie1	45	1	F	1	1	DIESTRO	2017-05-17	1	1	1	FALSE	0	2	TRUE	1	F	E	0	2	TRUE	FALSE	FALSE	FALSE	TRUE	FALSE	FALSE	TRUE	3	FALSE	TRUE	FALSE	TRUE	938.624	50.2475	87.4349	49.8149	0.310748	-6.62476	223	49.809	2.36447	-5.21515	392	49.2615	-0.649132	-9.36058	144	49.07	0.534811
PV045_Serie2	45	2	F	1	1	DIESTRO	2017-05-17	1	1	1	FALSE	0	2	TRUE	1	F	E	0	2	TRUE	FALSE	FALSE	FALSE	TRUE	FALSE	FALSE	TRUE	3	FALSE	TRUE	FALSE	TRUE	901.773	38.3407	79.6114	50.9404	5.25942	-2.24539	666	48.545	1.60167	-3.97177	386	48.1785	2.80474	-3.12594	575	47.8178	1.84823
PV046_Serie1	46	1	F	2	2	DIESTRO	2017-05-19	1	1	0	TRUE	2	0	FALSE						FALSE	TRUE	FALSE	FALSE	FALSE	FALSE	FALSE	FALSE	1	FALSE	FALSE	FALSE	TRUE	1260.29	62.3906	109.22	59.0704	-1.0919	3.87582	413	58.7937	-0.765073	4.04194	245	58.4775	-2.44894	4.91663	501	58.426	-2.53187
PV046_Serie2	46	2	F	2	2	DIESTRO	2017-05-19	1	1	0	TRUE	2	0	FALSE						FALSE	TRUE	FALSE	FALSE	FALSE	FALSE	FALSE	FALSE	1	FALSE	FALSE	FALSE	TRUE	1263.2	49.8893	106.682	64.6287	-6.1235	2.18372	278	64.0918	-5.80685	3.32498	360	63.2763	-5.96326	2.50633	528	63.0238	-6.7613
PV047_Serie1	47	1	M	0	2	AMBIDIESTRO	2017-05-19	1	1	1	TRUE	2	0	TRUE	1	F	E	0	2	TRUE	FALSE	FALSE	FALSE	FALSE	FALSE	FALSE	FALSE	3	TRUE	TRUE	TRUE	TRUE	662.396	30.4971	65.5493	34.928	-5.76406	-5.15797	68	33.2441	-4.34165	-4.47422	275	32.5241	-3.83251	-3.87706	466	30.3272	-3.42064
PV047_Serie2	47	2	M	0	2	AMBIDIESTRO	2017-05-19	1	1	1	TRUE	2	0	TRUE	1	F	E	0	2	TRUE	FALSE	FALSE	FALSE	FALSE	FALSE	FALSE	FALSE	3	TRUE	TRUE	TRUE	TRUE	598.412	35.1181	56.1054	38.6082	-3.93387	-2.49221	404	37.9254	-5.62134	-3.6742	53	36.5089	-5.09106	-2.40371	124	35.662	-4.97741
PV048_Serie1	48	1	F	1	2	DIESTRO	2017-05-19	0	1	0	TRUE	2	1	FALSE						TRUE	FALSE	FALSE	FALSE	FALSE	FALSE	FALSE	FALSE	0	FALSE	FALSE	FALSE	TRUE	1465.87	73.147	124.364	64.7307	7.04897	0.566304	64	64.5569	4.68566	-0.304566	148	64.4012	7.02257	-0.772488	235	64.2706	9.89406
PV048_Serie2	48	2	F	1	2	DIESTRO	2017-05-19	0	1	0	TRUE	2	1	FALSE						TRUE	FALSE	FALSE	FALSE	FALSE	FALSE	FALSE	FALSE	0	FALSE	FALSE	FALSE	TRUE	1426.38	82.9293	121.244	64.6342	5.61746	-0.386204	117	64.401	5.2321	-1.70751	260	64.3015	3.8054	-1.05156	45	64.0487	6.75986
PV049_Serie1	49	1	M	2	2	DIESTRO	2017-05-19	1	1	1	TRUE	1	0	FALSE						FALSE	FALSE	FALSE	FALSE	FALSE	FALSE	FALSE	FALSE	0	FALSE	FALSE	FALSE	TRUE	1087.74	16.8173	93.1889	51.42	1.84324	0.140414	1016	51.1736	1.12866	1.01723	681	51.1676	-1.02122	-2.47831	104	50.6506	-1.21238
PV049_Serie2	49	2	M	2	2	DIESTRO	2017-05-19	1	1	1	TRUE	1	0	FALSE						FALSE	FALSE	FALSE	FALSE	FALSE	FALSE	FALSE	FALSE	0	FALSE	FALSE	FALSE	TRUE	1070.07	21.4873	91.5303	50.1586	3.51554	3.22466	95	49.834	5.74673	5.2701	684	49.291	6.94802	3.73609	1340	48.922	4.59017
PV050_Serie1	50	1	F	1	2	DIESTRO	2017-05-22	1	1	0	TRUE	1	0	FALSE						FALSE	FALSE	FALSE	FALSE	FALSE	FALSE	FALSE	FALSE	0	FALSE	FALSE	FALSE	FALSE	1113.74	104.283	109.878	57.4888	0.29076	-1.166	46	53.6477	2.3653	-1.10327	192	52.8903	3.90136	1.2082	242	50.5214	7.34771
PV050_Serie2	50	2	F	1	2	DIESTRO	2017-05-22	1	1	0	TRUE	1	0	FALSE						FALSE	FALSE	FALSE	FALSE	FALSE	FALSE	FALSE	FALSE	0	FALSE	FALSE	FALSE	FALSE	1155.3	47.7396	107.077	56.8677	-7.15253	1.45495	155	56.4904	-7.36355	0.128521	264	56.4611	-4.12024	2.02006	57	56.1908	-6.38839
PV051_Serie1	51	1	M	1	2	DIESTRO	2017-05-22	2	1	2	TRUE	0	0	TRUE	3					FALSE	FALSE	FALSE	FALSE	FALSE	FALSE	FALSE	FALSE	1	FALSE	TRUE	FALSE	FALSE	2259.34	30.7477	66.7597	24.8094	4.36324	-1.46199	923	21.6595	0.0605674	-4.37172	62	21.0679	5.28662	-1.77245	1018	20.1813	5.71611
PV051_Serie2	51	2	M	1	2	DIESTRO	2017-05-22	2	1	2	TRUE	0	0	TRUE	3					FALSE	FALSE	FALSE	FALSE	FALSE	FALSE	FALSE	FALSE	1	FALSE	TRUE	FALSE	FALSE	753.886	29.9161	58.2232	20.6509	3.02663	-2.51392	317	20.1247	4.02139	-1.08586	49	18.3767	2.11096	-4.06678	230	16.6038	3.86042
PV052_Serie1	52	1	F	1	2	DIESTRO	2017-05-22	1	1	1	FALSE	0	0	FALSE						FALSE	FALSE	FALSE	FALSE	FALSE	FALSE	FALSE	FALSE	0	FALSE	FALSE	FALSE	FALSE	1636.62	47.1921	141.731	71.6624	1.19546	0.351778	355	71.0393	0.317367	0.600222	792	70.0483	1.24909	0.848101	507	70.0423	1.233
PV052_Serie2	52	2	F	1	2	DIESTRO	2017-05-22	1	1	1	FALSE	0	0	FALSE						FALSE	FALSE	FALSE	FALSE	FALSE	FALSE	FALSE	FALSE	0	FALSE	FALSE	FALSE	FALSE	1324.85	46.3235	132.263	60.6907	1.79875	-1.5482	282	60.2968	1.6594	-2.04607	567	59.4135	1.14339	-1.94196	420	53.1699	2.22873
PV053_Serie1	53	1	F	1	1	DIESTRO	2017-05-23	2	1	2	TRUE	0	0	TRUE	1	F	C	1	2	TRUE	FALSE	FALSE	FALSE	FALSE	FALSE	FALSE	TRUE	2	TRUE	TRUE	TRUE	TRUE	826.099	30.2379	72.6489	32.8015	3.34079	3.10063	268	31.769	0.269851	-0.0898484	702	31.1374	1.87846	2.80591	379	29.5125	1.21409
PV053_Serie2	53	2	F	1	1	DIESTRO	2017-05-23	2	1	2	TRUE	0	0	TRUE	1	F	C	1	2	TRUE	FALSE	FALSE	FALSE	FALSE	FALSE	FALSE	TRUE	2	TRUE	TRUE	TRUE	TRUE	749.839	36.6849	75.0937	32.8197	-0.262727	0.996675	553	30.8366	-0.4523	2.85994	201	30.3376	0.288121	0.602879	462	28.2593	0.909887
PV054_Serie1	54	1	F	1	1	DIESTRO	2017-05-23	1	0	1	TRUE	1	1	TRUE	3			2	2	TRUE	FALSE	FALSE	FALSE	TRUE	FALSE	FALSE	FALSE	3	TRUE	FALSE	FALSE	TRUE	1247.44	44.7433	116.381	64.1429	-5.4017	-8.0549	255	63.769	-3.89129	-7.08374	98	62.2959	-4.0174	-7.27052	519	61.8261	-5.04835
PV054_Serie2	54	2	F	1	1	DIESTRO	2017-05-23	1	0	1	TRUE	1	1	TRUE	3			2	2	TRUE	FALSE	FALSE	FALSE	TRUE	FALSE	FALSE	FALSE	3	TRUE	FALSE	FALSE	TRUE	1179.22	48.8899	111.836	64.1348	-0.475053	-4.29605	76	62.6151	-1.62117	-5.75457	193	61.947	-1.12811	-7.62024	306	61.1823	-0.349899
PV055_Serie1	55	1	F	0	1	AMBIDIESTRO	2017-05-23	1	1	0	FALSE	0		TRUE	1	H	A			TRUE	FALSE	FALSE	FALSE	FALSE	FALSE	FALSE	FALSE	1	TRUE	FALSE	FALSE	TRUE	1580.2	68.1121	130.664	64.3238	0.15353	-2.73089	561	62.4713	1.82462	0.728677	395	62.3165	3.28573	-0.624833	480	60.4985	2.34238
PV055_Serie2	55	2	F	0	1	AMBIDIESTRO	2017-05-23	1	1	0	FALSE	0		TRUE	1	H	A			TRUE	FALSE	FALSE	FALSE	FALSE	FALSE	FALSE	FALSE	1	TRUE	FALSE	FALSE	TRUE	1229.71	58.6693	108.427	58.8887	-0.692798	-1.9095	321	58.6419	-0.151396	-2.31281	575	57.6935	2.35839	-1.31783	51	54.3236	-2.18431
PV056_Serie1	56	1	F	1	2	DIESTRO	2017-05-24	1	1	1	FALSE	0	0	FALSE				2	2	TRUE	FALSE	FALSE	FALSE	FALSE	FALSE	FALSE	TRUE	3	FALSE	FALSE	TRUE	TRUE	1174.89	51.6207	101.323	43.802	1.94357	-2.59856	631	43.3982	2.3417	-3.50791	544	42.6413	2.35612	-2.88352	448	42.0116	2.33767
PV056_Serie2	56	2	F	1	2	DIESTRO	2017-05-24	1	1	1	FALSE	0	0	FALSE				2	2	TRUE	FALSE	FALSE	FALSE	FALSE	FALSE	FALSE	TRUE	3	FALSE	FALSE	TRUE	TRUE	1138.64	58.2128	96.694	43.5069	1.11006	-2.79846	465	43.305	1.78418	-2.95531	305	43.2559	2.32475	-2.21077	225	42.898	1.15823
PV057_Serie1	57	1	M	1	1	DIESTRO	2017-05-26	1	1	1	FALSE	0	0	FALSE				0	0	FALSE	FALSE	FALSE	FALSE	FALSE	FALSE	FALSE	FALSE	1	FALSE	FALSE	FALSE	TRUE	1057.03	40.7178	93.0804	61.0268	5.31824	-0.710934	59	60.3101	3.5889	0.196093	168	60.0233	5.49976	1.18116	284	59.7858	1.8851
PV057_Serie2	57	2	M	1	1	DIESTRO	2017-05-26	1	1	1	FALSE	0	0	FALSE				0	0	FALSE	FALSE	FALSE	FALSE	FALSE	FALSE	FALSE	FALSE	1	FALSE	FALSE	FALSE	TRUE	985.642	27.843	88.8488	56.1785	-4.88587	-2.28103	81	53.6177	-4.55881	-1.85896	966	52.0047	-3.59242	-1.7966	246	51.7942	-6.9599
PV058_Serie1	58	1	M	1	2	DIESTRO	2017-05-26	1	1	0	TRUE	2	0	FALSE						FALSE	FALSE	FALSE	FALSE	FALSE	FALSE	FALSE	FALSE	0	FALSE	FALSE	FALSE	FALSE	1487.28	78.9428	127.413	71.1714	8.65869	-3.46305	125	71.1713	11.539	-3.67849	202	70.2161	8.37355	-4.47493	284	69.5671	12.0521
PV058_Serie2	58	2	M	1	2	DIESTRO	2017-05-26	1	1	0	TRUE	2	0	FALSE						FALSE	FALSE	FALSE	FALSE	FALSE	FALSE	FALSE	FALSE	0	FALSE	FALSE	FALSE	FALSE	1155.43	73.5009	124.876	72.1396	5.49356	-5.0493	223	71.7586	7.37729	-3.44321	381	71.0694	4.24334	-2.64248	51	70.9219	4.62429
PV059_Serie1	59	1	M	1	2	DIESTRO	2017-05-26	1	1	1	TRUE	1	1	FALSE						FALSE	FALSE	FALSE	FALSE	FALSE	FALSE	FALSE	FALSE	1	TRUE	FALSE	FALSE	FALSE	1317.83	92.5444	123.195	53.3384	1.3338	-0.213614	369	52.8963	1.74457	0.154528	308	52.6243	0.874862	0.0896544	247	52.2497	0.74523
PV059_Serie2	59	2	M	1	2	DIESTRO	2017-05-26	1	1	1	TRUE	1	1	FALSE						FALSE	FALSE	FALSE	FALSE	FALSE	FALSE	FALSE	FALSE	1	TRUE	FALSE	FALSE	FALSE	1269.58	120.683	124.148	51.1398	-3.05976	-3.73059	197	51.0091	0.145869	-2.12859	102	49.8337	-0.682019	-2.53202	244	49.3591	-1.32852
PV060_Serie1	60	1	F	1	2	DIESTRO	2017-05-26	1	0	1	TRUE	1	0	FALSE				2	1	TRUE	FALSE	FALSE	FALSE	FALSE	FALSE	FALSE	FALSE	2	TRUE	TRUE	TRUE	TRUE	1252.09	76.1612	116.476	67.7332	5.39674	-0.93892	354	67.4641	-2.26644	-2.64554	129	67.0218	0.864465	-1.63931	285	66.9247	1.35726
PV060_Serie2	60	2	F	1	2	DIESTRO	2017-05-26	1	0	1	TRUE	1	0	FALSE				2	1	TRUE	FALSE	FALSE	FALSE	FALSE	FALSE	FALSE	FALSE	2	TRUE	TRUE	TRUE	TRUE	1228.48	88.507	114.986	67.5959	-2.23211	-3.67789	363	65.6253	-3.62681	-1.67805	115	64.7826	-1.91162	-4.48422	183	64.6703	-3.66964
PV061_Serie1	61	1	F	1	2	DIESTRO	2017-05-26	0	0	0	TRUE	1	0	FALSE						FALSE	FALSE	FALSE	FALSE	FALSE	FALSE	FALSE	FALSE	1	FALSE	FALSE	FALSE	FALSE	1602.31	68.1255	135.644	70.4883	1.89728	-1.51118	669	70.0097	1.15473	-1.79174	387	69.9246	1.73429	-1.17028	575	69.8983	1.23558
PV061_Serie2	61	2	F	1	2	DIESTRO	2017-05-26	0	0	0	TRUE	1	0	FALSE						FALSE	FALSE	FALSE	FALSE	FALSE	FALSE	FALSE	FALSE	1	FALSE	FALSE	FALSE	FALSE	1441.89	59.1907	133.375	72.1616	2.13252	0.713128	318	71.9457	3.43795	0.688882	200	71.0657	3.38502	2.05639	639	70.4399	1.09325
PV062_Serie1	62	1	F	2	1	DIESTRO	2017-05-29	0	1	0	TRUE	1	0	FALSE				2	0	FALSE	FALSE	FALSE	FALSE	FALSE	FALSE	FALSE	FALSE	1	FALSE	FALSE	FALSE	TRUE	1144.12	73.5297	107.705	52.0128	-0.343832	-0.033983	117	50.6972	1.59647	0.61053	260	50.3996	3.33485	2.62165	332	49.664	-0.726676
PV062_Serie2	62	2	F	2	1	DIESTRO	2017-05-29	0	1	0	TRUE	1	0	FALSE				2	0	FALSE	FALSE	FALSE	FALSE	FALSE	FALSE	FALSE	FALSE	1	FALSE	FALSE	FALSE	TRUE	1125.69	64.5463	104.712	49.0877	0.0576903	0.498396	288	48.563	0.266663	2.27798	445	48.1721	-1.46667	0.369199	206	48.0617	-2.29092
PV063_Serie1	63	1	F	1	0	DIESTRO	2017-05-29	0	1	0	TRUE	0	0	FALSE				2	2	FALSE	FALSE	FALSE	FALSE	FALSE	FALSE	FALSE	TRUE	1	TRUE	TRUE	FALSE	TRUE	1084.74	50.4063	101.888	54.8826	0.334258	4.45173	544	54.5333	-3.41535	0.463816	260	54.2666	0.534971	4.05885	456	53.3845	-1.34942
PV063_Serie2	63	2	F	1	0	DIESTRO	2017-05-29	0	1	0	TRUE	0	0	FALSE				2	2	FALSE	FALSE	FALSE	FALSE	FALSE	FALSE	FALSE	TRUE	1	TRUE	TRUE	FALSE	TRUE	1031.33	60.2414	99.2735	51.126	-1.4516	2.19931	300	51.1166	0.15764	2.36831	375	50.9598	-2.9917	1.66968	454	50.1869	-3.89427
PV064_Serie1	64	1	F	2	2	DIESTRO	2017-05-29	1	1	0	TRUE	2	0	FALSE				2	0	FALSE	FALSE	TRUE	FALSE	FALSE	FALSE	FALSE	FALSE	0	FALSE	FALSE	FALSE	FALSE	1272.65	38.7531	108.54	53.1435	-6.28904	-0.330764	72	52.9659	-8.17817	-0.540234	604	52.3631	-8.17091	-1.58194	194	52.2819	-7.74837
PV064_Serie2	64	2	F	2	2	DIESTRO	2017-05-29	1	1	0	TRUE	2	0	FALSE				2	0	FALSE	FALSE	TRUE	FALSE	FALSE	FALSE	FALSE	FALSE	0	FALSE	FALSE	FALSE	FALSE	1141.6	52.4633	105.616	48.1174	-5.35545	-2.83221	151	47.4971	-3.67235	-3.15199	558	47.4309	-2.93661	-1.63325	248	47.4138	-3.71479
PV065_Serie1	65	1	F	2	0	DIESTRO	2017-05-29	1	0	1	TRUE	1	2	FALSE						FALSE	FALSE	FALSE	FALSE	FALSE	FALSE	FALSE	FALSE	0	FALSE	FALSE	FALSE	FALSE	1149.11	65.1425	107.637	55.8425	-0.255066	1.58121	228	55.6918	0.192953	1.60532	467	55.536	1.08917	2.56821	144	55.0812	1.87282
PV065_Serie2	65	2	F	2	0	DIESTRO	2017-05-29	1	0	1	TRUE	1	2	FALSE						FALSE	FALSE	FALSE	FALSE	FALSE	FALSE	FALSE	FALSE	0	FALSE	FALSE	FALSE	FALSE	1120.45	67.3346	105.852	59.0495	-2.70248	2.07991	221	58.3826	-1.77895	2.27791	142	58.2174	-2.28722	2.97703	66	56.0394	-1.94406
PV066_Serie1	66	1	M	1	1	DIESTRO	2017-05-30	1	1	0	TRUE	0	1	FALSE						FALSE	FALSE	FALSE	FALSE	FALSE	FALSE	FALSE	FALSE	0	TRUE	FALSE	FALSE	FALSE	1232.4	72.1544	106.936	58.0906	5.96045	2.52841	360	56.4328	6.61987	2.49924	429	55.9098	5.95892	1.82584	283	55.0653	5.43182
PV066_Serie2	66	2	M	1	1	DIESTRO	2017-05-30	1	1	0	TRUE	0	1	FALSE						FALSE	FALSE	FALSE	FALSE	FALSE	FALSE	FALSE	FALSE	0	TRUE	FALSE	FALSE	FALSE	1113.58	98.0261	105.362	56.1071	4.89153	-0.973538	210	55.2525	6.49357	-0.386724	311	55.0783	5.71991	0.365343	259	54.9582	8.06052
PV068_Serie1	68	1	F	1	2	DIESTRO	2017-05-30	1	1	0	TRUE	1		FALSE				2	2	FALSE	FALSE	FALSE	FALSE	FALSE	FALSE	FALSE	FALSE	1	FALSE	FALSE	FALSE	TRUE	1276.49	56.6827	118.625	59.6162	-5.42959	2.28017	587	58.0482	-6.41211	0.464713	387	58.0329	-6.0936	1.04324	488	57.9688	-11.5839
PV068_Serie2	68	2	F	1	2	DIESTRO	2017-05-30	1	1	0	TRUE	1		FALSE				2	2	FALSE	FALSE	FALSE	FALSE	FALSE	FALSE	FALSE	FALSE	1	FALSE	FALSE	FALSE	TRUE	1418.37	65.4228	120.843	62.0183	-9.93364	-0.916968	245	61.8792	-12.5167	-1.97821	151	61.7075	-11.2045	-0.131221	61	61.6526	-4.5034
PV069_Serie1	69	1	F	0	2	DIESTRO	2017-05-30	1	1	0	TRUE	2	0	FALSE				2	2	FALSE	FALSE	FALSE	FALSE	FALSE	FALSE	FALSE	FALSE	1	TRUE	FALSE	FALSE	TRUE	1600.58	48.0367	135.938	60.9998	-0.17218	-1.58769	368	60.7746	0.144206	-0.538038	222	60.1677	1.33903	0.311847	911	58.9768	2.25545
PV069_Serie2	69	2	F	0	2	DIESTRO	2017-05-30	1	1	0	TRUE	2	0	FALSE				2	2	FALSE	FALSE	FALSE	FALSE	FALSE	FALSE	FALSE	FALSE	1	TRUE	FALSE	FALSE	TRUE	1616.36	51.4109	139.033	64.5529	1.63081	-0.0389685	334	63.8555	0.970594	0.0308957	199	63.5686	2.9112	-0.0348059	608	63.108	1.00133
PV070_Serie1	70	1	M	2	2	DIESTRO	2017-06-02	2	1	2	FALSE	0	0	FALSE				2	2	FALSE	FALSE	TRUE	FALSE	FALSE	FALSE	FALSE	FALSE	0	TRUE	FALSE	FALSE	TRUE	991.48	47.3939	85.7823	52.1073	0.536894	0.199005	303	51.4169	-1.08415	-1.31152	387	51.2366	0.725838	-1.45471	134	50.9225	-0.712113
PV070_Serie2	70	2	M	2	2	DIESTRO	2017-06-02	2	1	2	FALSE	0	0	FALSE				2	2	FALSE	FALSE	TRUE	FALSE	FALSE	FALSE	FALSE	FALSE	0	TRUE	FALSE	FALSE	TRUE	976.71	42.6884	85.8287	53.0941	1.04484	0.607563	331	52.6737	3.08889	2.41103	144	52.5156	2.3144	1.23326	240	52.5155	1.8688
PV071_Serie1	71	1	F	1	0	DIESTRO	2017-06-02	1	1	1	FALSE	0	3	TRUE	1	C	C	1	2	FALSE	FALSE	FALSE	FALSE	FALSE	FALSE	FALSE	FALSE	3	TRUE	TRUE	TRUE	TRUE	1128.11	38.319	96.0529	47.5083	-2.91823	-1.94317	602	47.429	-2.21534	-2.58842	358	46.9323	-1.55641	-3.10661	219	46.6761	-2.84542
PV071_Serie2	71	2	F	1	0	DIESTRO	2017-06-02	1	1	1	FALSE	0	3	TRUE	1	C	C	1	2	FALSE	FALSE	FALSE	FALSE	FALSE	FALSE	FALSE	FALSE	3	TRUE	TRUE	TRUE	TRUE	1081.29	42.1061	92.389	47.1401	-1.34014	-1.62946	387	46.7073	-0.63776	0.038174	177	46.4819	-1.82914	0.378751	716	46.3751	-2.2191
PV072_Serie1	72	1	F	1	1	DIESTRO	2017-06-02	1	1	0	TRUE	1	3	FALSE				2	2	TRUE	FALSE	FALSE	FALSE	FALSE	FALSE	FALSE	TRUE	1	TRUE	FALSE	FALSE	TRUE	1130.68	73.8042	108.28	47.1499	-5.50736	-3.0458	45	45.1172	-2.0749	-3.18943	111	44.4931	-3.4685	-1.43453	388	44.2619	-3.39333
PV072_Serie2	72	2	F	1	1	DIESTRO	2017-06-02	1	1	0	TRUE	1	3	FALSE				2	2	TRUE	FALSE	FALSE	FALSE	FALSE	FALSE	FALSE	TRUE	1	TRUE	FALSE	FALSE	TRUE	1089.13	80.0833	106.026	54.4	-6.44433	-4.87933	52	53.0895	-3.13894	-3.6065	233	52.181	-4.51319	-3.90948	174	52.1363	-5.56646
PV073_Serie1	73	1	M	1	1	DIESTRO	2017-06-02	1	1	0	FALSE	0	1	FALSE						TRUE	FALSE	FALSE	FALSE	FALSE	FALSE	FALSE	FALSE	0	FALSE	FALSE	FALSE	FALSE	1549.57	93.7995	134.49	65.5699	-2.77008	-0.79775	393	64.9435	-1.30014	-0.495177	464	63.1402	-3.24558	-0.487014	252	63.0976	-2.4958
PV073_Serie2	73	2	M	1	1	DIESTRO	2017-06-02	1	1	0	FALSE	0	1	FALSE						TRUE	FALSE	FALSE	FALSE	FALSE	FALSE	FALSE	FALSE	0	FALSE	FALSE	FALSE	FALSE	1369.05	88.4397	128.985	63.2937	3.19205	0.614993	394	63.0974	1.16321	1.0839	320	61.9105	0.492916	0.428374	43	61.143	1.90047
PV074_Serie1	74	1	F	2	2	DIESTRO	2017-06-05	0	1	0	TRUE	0	0	FALSE				0	0	FALSE	FALSE	FALSE	FALSE	FALSE	FALSE	FALSE	FALSE	1	FALSE	FALSE	TRUE	TRUE	989.452	25.4489	88.7634	52.328	0.386908	-1.43824	606	50.8103	0.413691	-1.46597	90	50.7573	2.06722	-0.564066	280	48.6433	1.89853
PV074_Serie2	74	2	F	2	2	DIESTRO	2017-06-05	0	1	0	TRUE	0	0	FALSE				0	0	FALSE	FALSE	FALSE	FALSE	FALSE	FALSE	FALSE	FALSE	1	FALSE	FALSE	TRUE	TRUE	956.708	29.1679	83.9734	50.9945	2.96221	-0.755708	509	50.4465	2.67441	-1.17475	89	47.8771	3.36261	-1.99989	373	47.1943	4.33188
PV075_Serie1	75	1	F	1	2	DIESTRO	2017-06-05	1	1	0	TRUE	0	2	FALSE				2	1	TRUE	FALSE	FALSE	FALSE	TRUE	FALSE	FALSE	TRUE	2	FALSE	TRUE	FALSE	TRUE	1196.1	57.9504	114.077	54.7926	-4.2306	-2.96697	537	52.8569	-4.16938	-3.79872	256	52.7657	-3.00813	-3.77973	161	52.2371	-4.62325
PV075_Serie2	75	2	F	1	2	DIESTRO	2017-06-05	1	1	0	TRUE	0	2	FALSE				2	1	TRUE	FALSE	FALSE	FALSE	TRUE	FALSE	FALSE	TRUE	2	FALSE	TRUE	FALSE	TRUE	1146.5	70.2515	108.938	57.8489	-0.991698	-2.00728	300	57.6494	-1.25665	-3.25269	446	56.5745	-0.294946	-2.77974	373	55.9309	-0.00318796
PV076_Serie1	76	1	F	1	2	DIESTRO	2017-06-06	0	1	0	TRUE	1	1	FALSE						FALSE	FALSE	FALSE	FALSE	FALSE	FALSE	FALSE	FALSE	0	FALSE	FALSE	FALSE	TRUE	1258.36	29.7625	106.765	50.3713	-4.72227	-2.82094	1141	49.8149	-5.75114	-3.69872	789	49.8039	-4.04151	-2.07918	609	49.677	-5.54223
PV076_Serie2	76	2	F	1	2	DIESTRO	2017-06-06	0	1	0	TRUE	1	1	FALSE						FALSE	FALSE	FALSE	FALSE	FALSE	FALSE	FALSE	FALSE	0	FALSE	FALSE	FALSE	TRUE	1250.14	28.885	106.35	51.3721	-5.93771	-6.86653	604	51.1185	-5.07375	-5.20585	428	50.7736	-4.50896	-5.82242	785	50.7212	-6.39045
PV077_Serie1	14	1	M	0	1	DIESTRO	2017-05-28	1	1	0	TRUE	0	0	TRUE	1	E	C	0		TRUE	FALSE	FALSE	FALSE	FALSE	FALSE	FALSE	FALSE	2	FALSE	FALSE	TRUE	TRUE	1080.52	30.7666	91.8565	50.1907	4.8051	1.64171	427	50.161	4.16191	0.265681	968	49.6848	3.73842	0.903183	268	49.1724	4.4868
PV077_Serie2	14	2	M	0	1	DIESTRO	2017-05-28	1	1	0	TRUE	0	0	TRUE	1	E	C	0		TRUE	FALSE	FALSE	FALSE	FALSE	FALSE	FALSE	FALSE	2	FALSE	FALSE	TRUE	TRUE	1116.69	30.1157	94.6714	47.0649	5.45855	2.06551	722	47.0526	4.95543	2.17855	568	46.6413	7.49921	1.13773	1014	46.3489	6.31024
PV078_Serie1	77	1	M	0	2	DIESTRO	2017-06-06	2	1	2	FALSE	1	0	FALSE				2	2	TRUE	FALSE	FALSE	FALSE	FALSE	FALSE	FALSE	FALSE	1	FALSE	TRUE	FALSE	TRUE	1109.29	73.1723	105.356	52.1566	0.617655	-3.54606	352	51.3933	2.24014	-2.97955	285	51.1822	-0.108056	-2.53508	141	50.5295	0.808737
PV078_Serie2	77	2	M	0	2	DIESTRO	2017-06-06	2	1	2	FALSE	1	0	FALSE				2	2	TRUE	FALSE	FALSE	FALSE	FALSE	FALSE	FALSE	FALSE	1	FALSE	TRUE	FALSE	TRUE	1093.57	66.1966	101.571	59.0789	-3.29227	-4.9249	52	59.0499	-0.869878	-5.33027	214	58.3964	-2.37145	-4.17268	437	58.1832	-0.0856269
PV079_Serie1	78	1	F	2	2	DIESTRO	2017-06-06	1	0	1	TRUE	1	1	FALSE						FALSE	FALSE	FALSE	FALSE	FALSE	FALSE	FALSE	FALSE	0	FALSE	FALSE	FALSE	TRUE	1176.27	35.9935	101.424	59.2469	3.88493	-1.01613	245	58.7624	2.44635	-3.31442	78	58.111	9.38083	0.954908	392	57.057	3.96732
PV079_Serie2	78	2	F	2	2	DIESTRO	2017-06-06	1	0	1	TRUE	1	1	FALSE						FALSE	FALSE	FALSE	FALSE	FALSE	FALSE	FALSE	FALSE	0	FALSE	FALSE	FALSE	TRUE	1187.4	45.3897	102.195	65.5256	2.92017	-0.954203	177	65.3199	2.14029	-1.27363	293	63.955	1.47935	-2.44287	61	63.3734	2.3195
PV080_Serie1	79	1	F	1	1	DIESTRO	2017-06-06	0	1	0	TRUE	2	0	TRUE	1					TRUE	FALSE	FALSE	FALSE	FALSE	FALSE	FALSE	FALSE	1	FALSE	FALSE	FALSE	TRUE	1552.22	67.8419	133.636	63.8508	-1.20227	1.09698	623	63.3097	-0.988529	0.729185	139	62.9259	-2.11636	0.568609	337	62.7371	-1.78364
PV080_Serie2	79	2	F	1	1	DIESTRO	2017-06-06	0	1	0	TRUE	2	0	TRUE	1					TRUE	FALSE	FALSE	FALSE	FALSE	FALSE	FALSE	FALSE	1	FALSE	FALSE	FALSE	TRUE	1362.86	89.4267	128.385	58.6495	-6.62532	-2.79333	116	58.539	-4.92649	-1.78213	185	57.8654	-5.16139	-1.32758	256	57.6491	-3.06352
PV081_Serie1	81	1	F	2	0	DIESTRO	2017-06-07	1	1	1	TRUE	1	2	FALSE				1	2	FALSE	FALSE	FALSE	FALSE	FALSE	FALSE	FALSE	FALSE	1	FALSE	FALSE	FALSE	TRUE	1077.32	29.6947	93.7433	50.5962	-6.13736	-8.00341	226	49.7896	-4.88888	-7.68805	979	49.6385	-5.07793	-7.78998	536	49.547	-5.84457
PV081_Serie2	81	2	F	2	0	DIESTRO	2017-06-07	1	1	1	TRUE	1	2	FALSE				1	2	FALSE	FALSE	FALSE	FALSE	FALSE	FALSE	FALSE	FALSE	1	FALSE	FALSE	FALSE	TRUE	1043.22	31.2717	91.0157	54.9936	-2.57238	-4.7991	209	54.4926	-3.43448	-4.27034	494	53.8512	-2.61493	-4.12256	631	52.9734	-2.38573
PV082_Serie1	82	1	M	2	1	DIESTRO	2017-06-07	1	1	0	TRUE	0		FALSE				0		TRUE	FALSE	FALSE	FALSE	TRUE	FALSE	FALSE	TRUE	2	FALSE	FALSE	TRUE	TRUE	1148.55	20.8979	98.2441	53.9094	1.81399	-2.52827	1469	53.0463	0.829454	-4.94063	1226	52.9466	1.43337	-2.53817	760	52.9418	2.88241
PV082_Serie2	82	2	M	2	1	DIESTRO	2017-06-07	1	1	0	TRUE	0		FALSE				0		TRUE	FALSE	FALSE	FALSE	TRUE	FALSE	FALSE	TRUE	2	FALSE	FALSE	TRUE	TRUE	1139.13	17.6227	98.6123	56.7951	2.0433	-4.30054	1714	56.6467	0.731643	-4.38528	1428	55.0284	1.39985	-2.7006	863	54.5911	-0.83486
PV083_Serie1	83	1	M	0	2	AMBIDIESTRO	2017-06-07	1	1	0	FALSE	0	0	TRUE	1	H	A	0		FALSE	FALSE	FALSE	FALSE	FALSE	FALSE	FALSE	FALSE	2	FALSE	FALSE	TRUE	TRUE	1482.18	21.0656	130.508	69.6725	4.02033	-1.71284	102	68.4114	1.58688	-1.69075	1542	68.2821	1.74347	-0.897974	1861	68.0808	2.54864
PV083_Serie2	83	2	M	0	2	AMBIDIESTRO	2017-06-07	1	1	0	FALSE	0	0	TRUE	1	H	A	0		FALSE	FALSE	FALSE	FALSE	FALSE	FALSE	FALSE	FALSE	2	FALSE	FALSE	TRUE	TRUE	1343.43	23.2428	118.471	56.2151	4.31177	-3.95399	1074	55.9448	3.79991	-3.15712	99	55.2933	3.07961	-4.61757	1544	54.1435	4.28794
PV084_Serie1	84	1	M	1	2	ZURDO	2017-06-09	1	1	1	FALSE	0	0	FALSE						FALSE	FALSE	FALSE	FALSE	FALSE	FALSE	FALSE	FALSE	0	FALSE	FALSE	FALSE	TRUE	1085.67	52.0957	93.9488	56.0162	-1.55143	-1.02327	54	55.0794	2.08059	-0.85091	409	54.9713	1.59656	-1.33781	319	54.9039	0.589896
PV084_Serie2	84	2	M	1	2	ZURDO	2017-06-09	1	1	1	FALSE	0	0	FALSE						FALSE	FALSE	FALSE	FALSE	FALSE	FALSE	FALSE	FALSE	0	FALSE	FALSE	FALSE	TRUE	1095.26	65.8211	96.2899	58.5086	2.63405	0.0052536	362	57.4565	1.88299	0.582965	82	57.0163	0.878737	-2.27487	432	55.2325	2.74226
PV085_Serie1	85	1	M	2	2	DIESTRO	2017-06-09	2	1	2	TRUE	1	0	TRUE	3	E	C			FALSE	FALSE	FALSE	TRUE	FALSE	FALSE	FALSE	FALSE	0	FALSE	FALSE	FALSE	TRUE	936.126	45.355	85.4969	52.061	3.67873	-2.89055	137	50.5838	2.06162	-2.50521	54	47.2914	5.09173	0.98156	319	47.251	4.52304
PV085_Serie2	85	2	M	2	2	DIESTRO	2017-06-09	2	1	2	TRUE	1	0	TRUE	3	E	C			FALSE	FALSE	FALSE	TRUE	FALSE	FALSE	FALSE	FALSE	0	FALSE	FALSE	FALSE	TRUE	853.622	48.7227	81.096	46.9904	-0.415522	1.46603	219	46.1331	1.29246	-1.00299	55	44.9731	2.31901	2.09575	300	44.9222	1.83546
PV086_Serie1	86	1	F	0	2	DIESTRO	2017-06-12	0	1	0	FALSE	0	0	TRUE	1	F	C	0	2	FALSE	FALSE	FALSE	FALSE	FALSE	FALSE	FALSE	FALSE	2	TRUE	TRUE	FALSE	TRUE	1113.91	57.5369	107.636	54.7727	-3.49905	6.1405	329	54.211	-4.34497	1.89408	408	53.9919	-5.3657	-2.16677	143	52.0197	-2.04753
PV086_Serie2	86	2	F	0	2	DIESTRO	2017-06-12	0	1	0	FALSE	0	0	TRUE	1	F	C	0	2	FALSE	FALSE	FALSE	FALSE	FALSE	FALSE	FALSE	FALSE	2	TRUE	TRUE	FALSE	TRUE	1043.04	52.1521	102.908	49.2769	-5.97634	-0.0590911	250	48.5483	-6.88303	0.210833	422	48.1667	-6.10652	0.560628	337	47.2055	-3.70478
PV087_Serie1	87	1	M	0	2	DIESTRO	2017-06-12	1	1	0	TRUE	1	0	FALSE						FALSE	FALSE	FALSE	FALSE	FALSE	FALSE	FALSE	FALSE	0	FALSE	FALSE	FALSE	FALSE	1297.45	59.19	120.324	56.7793	1.29771	-2.70637	61	56.3337	2.75608	-0.849277	260	56.0728	2.98003	-1.08609	367	55.9991	2.30207
PV087_Serie2	87	2	M	0	2	DIESTRO	2017-06-12	1	1	0	TRUE	1	0	FALSE						FALSE	FALSE	FALSE	FALSE	FALSE	FALSE	FALSE	FALSE	0	FALSE	FALSE	FALSE	FALSE	1420.56	78.2246	120.38	57.6404	3.14011	-2.43681	390	57.4226	3.69925	-3.591	318	56.7436	1.29363	-2.48268	241	56.7068	0.0366821
PV088_Serie1	88	1	F	1	2	DIESTRO	2017-06-12	1	1	0	FALSE	0	0	FALSE				2	2	FALSE	FALSE	FALSE	FALSE	FALSE	FALSE	FALSE	FALSE	1	TRUE	TRUE	FALSE	TRUE	1515.18	46.997	135.497	57.5994	-4.54126	-7.45793	210	57.1038	-3.86587	-4.4105	354	56.2527	-2.62034	-4.27627	745	55.7948	-1.19024
PV088_Serie2	88	2	F	1	2	DIESTRO	2017-06-12	1	1	0	FALSE	0	0	FALSE				2	2	FALSE	FALSE	FALSE	FALSE	FALSE	FALSE	FALSE	FALSE	1	TRUE	TRUE	FALSE	TRUE	1381.39	42.2701	124.25	59.719	-6.80315	-6.6603	880	57.9653	-5.94537	-7.30091	463	57.7566	-6.60216	-7.26319	326	57.593	-6.59376
PV089_Serie1	89	1	M	1	2	DIESTRO	2017-06-12	2	2	1	TRUE	2	2	FALSE				2	0	FALSE	FALSE	FALSE	FALSE	FALSE	FALSE	FALSE	FALSE	1	FALSE	FALSE	TRUE	TRUE	1510.84	46.8041	120.209	60.2254	-0.619332	1.0244	396	60.0129	-0.705119	-0.0959396	531	59.7501	0.406137	1.863	653	59.2995	-2.24351
PV089_Serie2	89	2	M	1	2	DIESTRO	2017-06-12	2	2	1	TRUE	2	2	FALSE				2	0	FALSE	FALSE	FALSE	FALSE	FALSE	FALSE	FALSE	FALSE	1	FALSE	FALSE	TRUE	TRUE	1312.27	46.6005	113.031	58.1536	-0.880651	-1.52479	177	57.7485	-1.21864	1.86829	533	57.1032	0.949741	1.5308	414	56.4015	-1.14811
PV090_Serie1	90	1	M	1	2	DIESTRO	2017-06-13	1	1	1	TRUE	2	0	FALSE						FALSE	FALSE	FALSE	FALSE	FALSE	FALSE	TRUE	FALSE	0	TRUE	FALSE	FALSE	TRUE	1115.12	26.152	96.8882	49.9658	0.797518	-2.91258	318	48.6738	1.55484	-2.81296	105	48.2696	1.62409	-1.96084	1001	47.9125	0.77486
PV090_Serie2	90	2	M	1	2	DIESTRO	2017-06-13	1	1	1	TRUE	2	0	FALSE						FALSE	FALSE	FALSE	FALSE	FALSE	FALSE	TRUE	FALSE	0	TRUE	FALSE	FALSE	TRUE	1086.03	26.8289	91.8815	50.5438	0.82483	-2.64702	81	50.5061	0.0239922	-3.14726	908	50.2368	0.421259	-2.39102	1093	50.0565	1.64574
PV091_Serie1	91	1	F	2	1	DIESTRO	2017-06-14	1	1	1	FALSE	0	3	FALSE				0	2	FALSE	FALSE	FALSE	FALSE	FALSE	FALSE	FALSE	FALSE	0	TRUE	FALSE	FALSE	TRUE	1203.84	43.1792	111.974	48.4493	-1.44217	6.26993	333	48.1456	-2.83552	6.36403	209	47.9199	-1.64118	4.44942	459	47.5601	-1.9774
PV091_Serie2	91	2	F	2	1	DIESTRO	2017-06-14	1	1	1	FALSE	0	3	FALSE				0	2	FALSE	FALSE	FALSE	FALSE	FALSE	FALSE	FALSE	FALSE	0	TRUE	FALSE	FALSE	TRUE	1281.52	48.3959	108.328	49.5598	-9.34605	1.93438	282	49.4254	-3.78486	1.746	65	49.3724	-10.789	-1.47996	616	49.3313	-8.10146
PV092_Serie1	92	1	F	0	2	DIESTRO	2017-06-14	1	1	0	TRUE	2	0	FALSE				2	2	TRUE	FALSE	FALSE	FALSE	FALSE	FALSE	FALSE	FALSE	2	FALSE	FALSE	FALSE	TRUE	1554.18	51.1918	132.766	59.9718	-3.38577	-5.17927	348	59.7475	-2.58324	-3.88757	68	59.5574	-2.05398	-4.75355	217	58.8002	-3.28784
PV092_Serie2	92	2	F	0	2	DIESTRO	2017-06-14	1	1	0	TRUE	2	0	FALSE				2	2	TRUE	FALSE	FALSE	FALSE	FALSE	FALSE	FALSE	FALSE	2	FALSE	FALSE	FALSE	TRUE	1544.28	55.9522	130.494	60.3682	-5.84963	-5.69682	632	60.2077	-3.42039	-3.96229	55	60.1783	-5.52821	-5.62031	290	60.1	-4.89856
PV093_Serie1	93	1	F	1	1	DIESTRO	2017-06-14	1	1	0	FALSE	0	2	FALSE				2	2	TRUE	FALSE	FALSE	FALSE	FALSE	FALSE	FALSE	FALSE	2	FALSE	TRUE	FALSE	TRUE	1341.33	35.5602	114.838	59.1465	-2.12252	-5.60611	612	58.6065	-1.25709	-5.50858	294	58.5431	-3.12983	-4.81092	768	58.1523	-4.09274
PV093_Serie2	93	2	F	1	1	DIESTRO	2017-06-14	1	1	0	FALSE	0	2	FALSE				2	2	TRUE	FALSE	FALSE	FALSE	FALSE	FALSE	FALSE	FALSE	2	FALSE	TRUE	FALSE	TRUE	1339.52	44.1212	114.141	61.6559	-3.22247	-5.44885	465	60.5497	-2.34352	-5.86039	209	60.543	-1.99275	-5.97061	714	60.4828	-3.10795
PV094_Serie1	94	1	M	1	2	DIESTRO	2017-06-15	1	1	0	TRUE	2	3	FALSE						FALSE	FALSE	FALSE	FALSE	FALSE	FALSE	FALSE	FALSE	0	FALSE	FALSE	FALSE	TRUE	1440.43	46.0495	124.038	63.1569	0.0577982	0.0845703	213	62.8797	-0.704694	0.376425	470	62.7341	1.40385	0.18479	80	62.4234	1.87047
PV094_Serie2	94	2	M	1	2	DIESTRO	2017-06-15	1	1	0	TRUE	2	3	FALSE						FALSE	FALSE	FALSE	FALSE	FALSE	FALSE	FALSE	FALSE	0	FALSE	FALSE	FALSE	TRUE	1415.8	54.9611	124.895	63.5641	4.28743	-0.196743	698	61.4374	3.53542	-0.900178	488	61.0335	5.4518	-0.577824	591	60.6647	4.37626
PV095_Serie1	95	1	M	1	1	DIESTRO	2017-06-15	1	1	1	FALSE	0	2	FALSE				0	2	TRUE	FALSE	FALSE	FALSE	FALSE	FALSE	FALSE	FALSE	2	FALSE	TRUE	FALSE	TRUE	1203.37	67.9103	115.641	54.0708	-7.31137	-1.81808	149	51.3425	-4.83015	-1.3495	462	51.1332	-9.00213	-1.66898	232	49.1157	-5.42656
PV095_Serie2	95	2	M	1	1	DIESTRO	2017-06-15	1	1	1	FALSE	0	2	FALSE				0	2	TRUE	FALSE	FALSE	FALSE	FALSE	FALSE	FALSE	FALSE	2	FALSE	TRUE	FALSE	TRUE	1155.58	84.7197	101.096	49.3844	-2.20282	1.03391	255	48.8848	-1.0477	-0.641419	82	48.4672	-0.387685	0.872344	367	48.3451	-0.672519
PV096_Serie1	96	1	F	0	1	DIESTRO	2017-06-16	1	1	1	FALSE	0	1	TRUE	1	C	C	1	1	TRUE	FALSE	FALSE	FALSE	FALSE	FALSE	FALSE	FALSE	1	FALSE	FALSE	FALSE	TRUE	1330.09	33.8963	114.819	62.0231	-0.0389607	3.62338	230	60.8182	-2.05128	0.558701	558	60.2875	-1.55779	1.95467	734	59.8469	-2.3949
PV096_Serie2	96	2	F	0	1	DIESTRO	2017-06-16	1	1	1	FALSE	0	1	TRUE	1	C	C	1	1	TRUE	FALSE	FALSE	FALSE	FALSE	FALSE	FALSE	FALSE	1	FALSE	FALSE	FALSE	TRUE	1320.23	42.809	113.791	62.8691	-0.226293	0.87182	445	61.0255	-1.47192	1.44823	177	60.2813	-1.24072	-1.97392	576	60.187	-0.191196
PV097_Serie1	97	1	F	1	2	DIESTRO	2017-06-16	0	0	0	TRUE	1	1	FALSE						FALSE	FALSE	FALSE	FALSE	FALSE	FALSE	FALSE	FALSE	0	FALSE	FALSE	FALSE	FALSE	1375.72	37.2623	118.658	46.8187	-3.98528	0.870372	458	45.8507	-3.66063	-1.147	88	45.6306	-4.09568	-0.276853	280	44.6541	-1.23214
PV097_Serie2	97	2	F	1	2	DIESTRO	2017-06-16	0	0	0	TRUE	1	1	FALSE						FALSE	FALSE	FALSE	FALSE	FALSE	FALSE	FALSE	FALSE	0	FALSE	FALSE	FALSE	FALSE	1156.44	47.2403	109.592	47.2598	-3.10767	2.63734	71	46.6215	-5.63417	1.79069	189	44.9541	-7.1836	-1.07608	630	44.5056	-7.14281
PV098_Serie1	98	1	M	1	1	DIESTRO	2017-06-16	1	1	0	FALSE	0	0	FALSE						FALSE	FALSE	FALSE	FALSE	FALSE	FALSE	FALSE	FALSE	0	FALSE	FALSE	FALSE	TRUE	1620.35	55.9513	140.654	79.1993	-0.0501904	-1.33052	187	79.0637	2.14559	-2.91132	60	78.7684	-1.48926	-2.30837	312	78.0898	0.206787
PV098_Serie2	98	2	M	1	1	DIESTRO	2017-06-16	1	1	0	FALSE	0	0	FALSE						FALSE	FALSE	FALSE	FALSE	FALSE	FALSE	FALSE	FALSE	0	FALSE	FALSE	FALSE	TRUE	1509.22	70.922	135.3	75.0042	1.91057	-1.87734	59	70.8866	-0.759684	-4.29767	591	69.0753	-4.24984	-4.48673	150	68.9729	-1.156
PV099_Serie1	99	1	M	2	2	DIESTRO	2017-06-16	2	1	1	TRUE	0	0	TRUE	2	E	C			FALSE	FALSE	FALSE	FALSE	FALSE	FALSE	FALSE	FALSE	0	TRUE	FALSE	TRUE	FALSE	1161.92	95.5526	111.778	59.2648	10.2022	-8.47653	163	57.3764	13.0028	-10.9486	331	56.3301	9.7724	-8.82598	222	55.9015	12.6331
PV099_Serie2	99	2	M	2	2	DIESTRO	2017-06-16	2	1	1	TRUE	0	0	TRUE	2	E	C			FALSE	FALSE	FALSE	FALSE	FALSE	FALSE	FALSE	FALSE	0	TRUE	FALSE	TRUE	FALSE	1185.44	109.358	111.812	56.291	11.3871	-7.0577	238	55.7027	9.43255	-9.39193	89	55.547	10.2048	-9.64537	139	54.2547	13.5376
PV100_Serie1	100	1	F	1	1	DIESTRO	2017-06-19	0	1	0	TRUE	0	0	TRUE	3	G	C	2	2	TRUE	FALSE	FALSE	FALSE	FALSE	FALSE	FALSE	FALSE	2	FALSE	TRUE	FALSE	TRUE	1309.1	42.5585	114.915	51.694	-8.48263	-8.24254	458	50.5075	-9.26296	-7.76692	584	49.3799	-5.39206	-5.97435	713	49.0408	-5.11329
PV100_Serie2	100	2	F	1	1	DIESTRO	2017-06-19	0	1	0	TRUE	0	0	TRUE	3	G	C	2	2	TRUE	FALSE	FALSE	FALSE	FALSE	FALSE	FALSE	FALSE	2	FALSE	TRUE	FALSE	TRUE	1354.95	36.3843	116.408	54.0567	-7.40185	-5.63066	732	53.6945	-5.86034	-5.62633	428	53.6843	-5.57253	-6.39927	264	53.237	-6.31332
PV101_Serie1	101	1	F	1	0	DIESTRO	2017-06-19	1	1	1	FALSE	0	0	FALSE				2	2	FALSE	FALSE	TRUE	FALSE	TRUE	FALSE	FALSE	TRUE	3	FALSE	TRUE	FALSE	TRUE	821.15	42.8575	83.9007	39.4355	-1.99517	-0.664183	72	37.8493	-1.89276	-1.99189	192	35.1524	-1.41564	-1.18976	281	33.1815	-2.14994
PV101_Serie2	101	2	F	1	0	DIESTRO	2017-06-19	1	1	1	FALSE	0	0	FALSE				2	2	FALSE	FALSE	TRUE	FALSE	TRUE	FALSE	FALSE	TRUE	3	FALSE	TRUE	FALSE	TRUE	782.069	63.6864	74.764	33.5849	-1.86812	-1.86106	208	33.3192	-0.564891	0.0870503	263	31.3596	-0.669395	-0.915808	320	30.9516	0.172478
PV102_Serie1	102	1	M	1	2	DIESTRO	2017-06-19	1	1	0	FALSE	0	0	FALSE						TRUE	FALSE	FALSE	FALSE	FALSE	FALSE	FALSE	FALSE	1	FALSE	FALSE	FALSE	FALSE	1607.87	48.1398	140.181	68.876	-8.34162	3.64692	87	67.1771	-1.38323	7.73126	556	65.8498	2.54056	8.89893	803	65.685	-1.30137
PV102_Serie2	102	2	M	1	2	DIESTRO	2017-06-19	1	1	0	FALSE	0	0	FALSE						TRUE	FALSE	FALSE	FALSE	FALSE	FALSE	FALSE	FALSE	1	FALSE	FALSE	FALSE	FALSE	1554.86	51.8979	133.406	64.4876	-4.0581	2.64992	81	63.3989	-1.47093	6.56259	830	63.1299	-2.25925	7.55623	461	63.0894	-2.52854
PV103_Serie1	103	1	F	2	1	DIESTRO	2017-06-20	1	1	0	TRUE	0		TRUE	1	F		1	0	FALSE	FALSE	FALSE	FALSE	FALSE	FALSE	FALSE	FALSE	2	FALSE	TRUE	FALSE	TRUE	1265.48	23.0423	101.818	65.771	-4.99912	-4.42272	757	65.3495	-4.03703	-2.80196	1204	65.1903	-2.7711	-5.01711	334	65.1596	-3.70642
PV103_Serie2	103	2	F	2	1	DIESTRO	2017-06-20	1	1	0	TRUE	0		TRUE	1	F		1	0	FALSE	FALSE	FALSE	FALSE	FALSE	FALSE	FALSE	FALSE	2	FALSE	TRUE	FALSE	TRUE	1183.49	22.9181	104.634	68.559	-2.4709	-4.03625	131	66.3634	-3.35465	-4.85628	408	66.0481	-1.96406	-4.53871	817	65.3314	-2.59971
PV104_Serie1	104	1	M	1	1	AMBIDIESTRO	2017-06-20	2	1	2	TRUE	1	0	FALSE						FALSE	FALSE	FALSE	FALSE	FALSE	FALSE	FALSE	FALSE	0	FALSE	FALSE	FALSE	FALSE	1162.09	44.1523	100.896	56.3158	0.282059	-3.58586	559	56.2585	4.46649	-1.09051	201	56.2181	1.21624	-0.876985	322	55.8545	2.96946
PV104_Serie2	104	2	M	1	1	AMBIDIESTRO	2017-06-20	2	1	2	TRUE	1	0	FALSE						FALSE	FALSE	FALSE	FALSE	FALSE	FALSE	FALSE	FALSE	0	FALSE	FALSE	FALSE	FALSE	1149.96	51.4295	101.524	56.2834	0.926092	-3.27864	154	53.5393	-0.671408	-0.715624	352	52.5848	1.97239	0.319487	253	51.8385	1.90503
PV105_Serie1	105	1	M	0	2	DIESTRO	2017-06-20	1	1	0	TRUE	2	0	FALSE					0	FALSE	FALSE	FALSE	FALSE	FALSE	FALSE	FALSE	FALSE	1	FALSE	FALSE	FALSE	TRUE	1413.79	52.3626	122.336	71.6473	-2.3315	-4.58011	444	69.5789	1.0068	-3.88115	218	68.9842	-4.25862	-3.99605	762	68.4209	-1.1134
PV105_Serie2	105	2	M	0	2	DIESTRO	2017-06-20	1	1	0	TRUE	2	0	FALSE					0	FALSE	FALSE	FALSE	FALSE	FALSE	FALSE	FALSE	FALSE	1	FALSE	FALSE	FALSE	TRUE	1255.05	62.0082	116.735	71.1777	-1.49139	-4.44087	188	70.8234	0.177388	-2.00688	545	70.2666	1.14831	-1.74809	282	69.9063	-0.0396202
PV106_Serie1	106	1	M	2	2	DIESTRO	2017-06-20	2	1	2	TRUE	1	0	FALSE				0	0	FALSE	FALSE	FALSE	FALSE	FALSE	FALSE	FALSE	TRUE	1	TRUE	FALSE	FALSE	TRUE	1064.94	32.3493	91.5531	55.2937	-3.4006	1.91756	784	55.179	-3.24502	2.27237	367	54.9749	-4.01047	2.21504	656	54.6028	-3.97272
PV106_Serie2	106	2	M	2	2	DIESTRO	2017-06-20	2	1	2	TRUE	1	0	FALSE				0	0	FALSE	FALSE	FALSE	FALSE	FALSE	FALSE	FALSE	TRUE	1	TRUE	FALSE	FALSE	TRUE	1133.21	36.6972	96.4995	54.9986	-3.58162	-0.0593019	226	54.819	-4.62958	-1.20863	501	54.5903	-2.31036	1.27109	373	54.3167	-3.03767
PV107_Serie1	107	1	F	1	2	DIESTRO	2017-06-20	0	0	0	TRUE	0	0	TRUE	1	H		0	0	FALSE	FALSE	FALSE	FALSE	FALSE	FALSE	FALSE	TRUE	1	FALSE	FALSE	FALSE	TRUE	1196.45	19.7825	104.123	52.851	2.30848	-4.6108	1611	52.8062	0.997987	-2.32346	99	51.0391	5.65054	-0.804185	1359	48.8109	2.76314
PV107_Serie2	107	2	F	1	2	DIESTRO	2017-06-20	0	0	0	TRUE	0	0	TRUE	1	H		0	0	FALSE	FALSE	FALSE	FALSE	FALSE	FALSE	FALSE	TRUE	1	FALSE	FALSE	FALSE	TRUE	1219.46	25.4903	104.203	54.1968	2.23927	-4.03445	679	53.4487	0.35296	-5.02403	1064	53.3742	2.57044	-3.712	1281	52.9414	2.71284
PV108_Serie1	108	1	M	1	1	DIESTRO	2017-06-20	1	1	1	FALSE	0	0	FALSE						FALSE	FALSE	FALSE	FALSE	FALSE	FALSE	FALSE	FALSE	0	FALSE	FALSE	FALSE	TRUE	1300.91	38.0829	104.761	61.3046	-3.49017	2.96257	344	60.8631	-4.74551	3.00443	203	60.8269	-2.72429	2.72467	481	60.7452	-1.96376
PV108_Serie2	108	2	M	1	1	DIESTRO	2017-06-20	1	1	1	FALSE	0	0	FALSE						FALSE	FALSE	FALSE	FALSE	FALSE	FALSE	FALSE	FALSE	0	FALSE	FALSE	FALSE	TRUE	1213.13	38.7829	103.018	61.6887	-6.29802	2.26673	445	61.342	-8.82027	1.52556	180	61.1569	-7.7251	2.63488	836	60.967	-6.70402
PV109_Serie1	109	1	F	0	2	DIESTRO	2017-06-21	1	1	1	FALSE	0	0	FALSE						FALSE	FALSE	FALSE	FALSE	FALSE	FALSE	FALSE	FALSE	0	FALSE	FALSE	FALSE	FALSE	1248.25	87.6582	115.927	60.1876	0.69276	2.38083	240	59.5754	2.41895	3.24089	371	58.321	-3.98501	1.90427	51	58.2836	2.55706
PV109_Serie2	109	2	F	0	2	DIESTRO	2017-06-21	1	1	1	FALSE	0	0	FALSE						FALSE	FALSE	FALSE	FALSE	FALSE	FALSE	FALSE	FALSE	0	FALSE	FALSE	FALSE	FALSE	1261.42	100.752	119.413	64.123	3.18407	2.65154	161	63.0206	2.36144	2.57042	220	60.7533	4.65772	3.94075	327	60.6583	-0.727489
PV110_Serie1	146	1	M	2	2	DIESTRO	2017-11-03	2	1	2	FALSE	0	0	TRUE	2	E	C	1	2	TRUE	FALSE	FALSE	FALSE	FALSE	FALSE	FALSE	FALSE	0	TRUE	FALSE	TRUE	TRUE	830.524	11.145	78.4232	45.0996	-3.91172	-0.660697	105	41.3996	-2.53739	-0.470181	685	40.3245	-2.51533	-0.0807096	973	39.7022	-1.8891
PV110_Serie2	146	2	M	2	2	DIESTRO	2017-11-03	2	1	2	FALSE	0	0	TRUE	2	E	C	1	2	TRUE	FALSE	FALSE	FALSE	FALSE	FALSE	FALSE	FALSE	0	TRUE	FALSE	TRUE	TRUE	733.033	12.492	70.0469	39.3086	-0.757437	0.965109	1555	34.9865	-2.30425	0.461631	328	34.8518	-2.8438	-0.742024	88	33.489	-1.10564
PV111_Serie1	147	1	M	1	2	DIESTRO	2017-11-06	1	1	0	TRUE	1	2	TRUE	2	E	C	2	2	FALSE	FALSE	FALSE	FALSE	FALSE	FALSE	FALSE	FALSE	0	FALSE	TRUE	FALSE	TRUE	1353.34	78.6825	132.335	59.0445	7.22803	3.90496	356	58.5447	7.62833	0.420154	206	56.1783	4.31465	2.24933	281	55.4139	6.15799
PV111_Serie2	147	2	M	1	2	DIESTRO	2017-11-06	1	1	0	TRUE	1	2	TRUE	2	E	C	2	2	FALSE	FALSE	FALSE	FALSE	FALSE	FALSE	FALSE	FALSE	0	FALSE	TRUE	FALSE	TRUE	1390.89	88.2541	131.192	56.71	3.5462	1.50507	345	55.7065	4.63303	2.43303	127	55.3772	3.58946	2.69983	50	55.1258	5.09417
PV112_Serie1	148	1	M	1	1	DIESTRO	2017-11-06	2	1	1	FALSE	0	0	TRUE	3			2	2	TRUE	FALSE	FALSE	FALSE	FALSE	FALSE	FALSE	FALSE	0	TRUE	FALSE	TRUE	TRUE	1137.14	50.856	97.2208	55.4501	7.27219	-5.12034	613	55.2934	3.44395	-6.57703	146	54.9107	5.11042	-6.24535	527	54.8209	6.37977
PV112_Serie2	148	2	M	1	1	DIESTRO	2017-11-06	2	1	1	FALSE	0	0	TRUE	3			2	2	TRUE	FALSE	FALSE	FALSE	FALSE	FALSE	FALSE	FALSE	0	TRUE	FALSE	TRUE	TRUE	1150.56	60.1757	98.0317	59.9184	1.9064	-8.88568	531	59.5725	1.78855	-6.84569	368	59.3819	2.34293	-8.01711	289	59.357	2.89909
PV113_Serie1	110	1	F	2	1	DIESTRO	2017-06-21	1	1	1	TRUE	1	0	TRUE	3			2	2	FALSE	FALSE	FALSE	FALSE	FALSE	FALSE	FALSE	TRUE	3	TRUE	TRUE	TRUE	TRUE	1407.83	58.7576	131.574	59.7852	-0.403521	0.946225	178	59.7611	-0.588323	-2.05467	63	59.4056	1.30816	0.747019	604	59.3064	-0.00393432
PV113_Serie2	110	2	F	2	1	DIESTRO	2017-06-21	1	1	1	TRUE	1	0	TRUE	3			2	2	FALSE	FALSE	FALSE	FALSE	FALSE	FALSE	FALSE	TRUE	3	TRUE	TRUE	TRUE	TRUE	1410.98	76.6837	131.181	61.318	-4.22653	-2.25902	55	60.963	-2.85059	-1.48505	132	60.4475	-3.01266	-0.572618	385	60.2428	-4.16276
PV114_Serie1	111	1	M	0	2	ZURDO	2017-06-21	1	1	0	TRUE	0	0	FALSE						FALSE	FALSE	FALSE	FALSE	TRUE	TRUE	TRUE	TRUE	0	FALSE	FALSE	FALSE	FALSE	807.461	40.6986	76.8128	44.3382	-1.64322	-2.37901	251	43.8806	-1.17022	-2.82487	155	43.3626	1.15558	-1.06444	345	43.2728	-2.13575
PV114_Serie2	111	2	M	0	2	ZURDO	2017-06-21	1	1	0	TRUE	0	0	FALSE						FALSE	FALSE	FALSE	FALSE	TRUE	TRUE	TRUE	TRUE	0	FALSE	FALSE	FALSE	FALSE	832.751	52.0469	80.2277	47.37	2.81967	0.257404	408	45.9681	4.97081	1.77441	191	43.6459	3.95982	1.05266	123	42.6818	5.56656
PV115_Serie1	112	1	M	1	1	DIESTRO	2017-06-22	1	1	1	FALSE	1	0	FALSE				2	1	TRUE	FALSE	FALSE	FALSE	FALSE	FALSE	FALSE	FALSE	2	FALSE	FALSE	FALSE	TRUE	1228.14	67.3323	115.291	57.0122	2.79756	-0.260358	65	56.8483	0.761044	-2.3694	243	55.795	1.85643	-1.33988	403	55.6267	4.8081
PV115_Serie2	112	2	M	1	1	DIESTRO	2017-06-22	1	1	1	FALSE	1	0	FALSE				2	1	TRUE	FALSE	FALSE	FALSE	FALSE	FALSE	FALSE	FALSE	2	FALSE	FALSE	FALSE	TRUE	1254.85	72.6185	111.685	58.9181	1.69538	-1.02739	270	58.8233	3.89924	-0.564996	345	58.1634	3.26797	1.1211	128	57.4343	2.18081
PV116_Serie1	113	1	M	1	0	DIESTRO	2017-06-23	1	1	0	TRUE	0	2	TRUE	1	C	B	0	2	FALSE	FALSE	FALSE	FALSE	FALSE	FALSE	FALSE	FALSE	2	FALSE	TRUE	FALSE	TRUE	1125.26	59.8544	106.812	56.4935	-0.271647	-2.88263	346	56.3666	-0.150344	-3.4168	270	55.9683	-1.68972	-2.73222	170	55.0259	0.346292
PV116_Serie2	113	2	M	1	0	DIESTRO	2017-06-23	1	1	0	TRUE	0	2	TRUE	1	C	B	0	2	FALSE	FALSE	FALSE	FALSE	FALSE	FALSE	FALSE	FALSE	2	FALSE	TRUE	FALSE	TRUE	1101.18	84.7063	107.176	61.7445	-0.0130994	-3.25076	241	61.693	1.48979	-1.85444	179	61.6055	1.04911	-3.73866	118	60.6315	0.038164
PV117_Serie1	114	1	M	1	2	DIESTRO	2017-06-23	1	1	1	FALSE	0	1	TRUE	1	E	E	0	2	TRUE	FALSE	FALSE	FALSE	FALSE	FALSE	FALSE	FALSE	3	FALSE	FALSE	TRUE	TRUE	1476.78	68.4965	128.589	69.2335	4.57742	-3.1371	424	67.8659	-2.99299	-6.32449	515	67.3581	3.14731	-1.17361	341	66.5649	-0.871569
PV117_Serie2	114	2	M	1	2	DIESTRO	2017-06-23	1	1	1	FALSE	0	1	TRUE	1	E	E	0	2	TRUE	FALSE	FALSE	FALSE	FALSE	FALSE	FALSE	FALSE	3	FALSE	FALSE	TRUE	TRUE	1355.67	79.9332	126.258	64.6242	-0.0535705	-2.23683	65	64.3445	-2.97711	-3.9484	147	63.1166	4.02015	0.365577	457	62.6474	1.00682
PV118_Serie1	118	1	F	0	1	DIESTRO	2017-06-27	1	1	0	TRUE	1	0	TRUE	1	E	C	0	2	TRUE	FALSE	FALSE	FALSE	FALSE	FALSE	FALSE	FALSE	2	TRUE	FALSE	FALSE	TRUE	1474.47	45.5082	130.755	66.403	0.410307	-2.91367	259	64.7909	1.60232	-4.47566	108	63.9843	-0.164856	-2.83758	393	63.7606	-1.08379
PV118_Serie2	118	2	F	0	1	DIESTRO	2017-06-27	1	1	0	TRUE	1	0	TRUE	1	E	C	0	2	TRUE	FALSE	FALSE	FALSE	FALSE	FALSE	FALSE	FALSE	2	TRUE	FALSE	FALSE	TRUE	1424.85	44.2499	125.295	72.7104	-1.17154	-3.72737	217	72.1369	-2.15015	-5.2749	770	71.2891	-2.19703	-3.62614	357	71.1633	0.0471576
PV119_Serie1	119	1	F	0	2	DIESTRO	2017-06-28	1	1	0	TRUE	0	0	FALSE						FALSE	FALSE	FALSE	FALSE	FALSE	FALSE	FALSE	FALSE	0	FALSE	FALSE	FALSE	FALSE	1639.62	62.3906	140.238	66.6119	-2.76062	1.36177	611	65.7527	-9.26914	-1.23505	727	65.1932	-4.48486	1.52397	295	64.7135	-4.35919
PV119_Serie2	119	2	F	0	2	DIESTRO	2017-06-28	1	1	0	TRUE	0	0	FALSE						FALSE	FALSE	FALSE	FALSE	FALSE	FALSE	FALSE	FALSE	0	FALSE	FALSE	FALSE	FALSE	1568.14	65.9993	136.864	65.5012	-4.84959	-0.926988	454	63.6219	-4.44058	2.917	657	63.0275	-8.48609	0.333033	556	62.494	2.02298
PV120_Serie1	120	1	M	0	2	DIESTRO	2017-06-30	1	1	0	TRUE	1	0	FALSE						FALSE	FALSE	FALSE	FALSE	FALSE	FALSE	FALSE	FALSE	0	FALSE	FALSE	FALSE	FALSE	1311.12	56.7094	122.325	55.7701	-3.11895	-4.67003	161	55.0165	-4.39824	-5.94991	383	54.2294	-2.62704	-4.80452	486	54.0186	-3.83861
PV120_Serie2	120	2	M	0	2	DIESTRO	2017-06-30	1	1	0	TRUE	1	0	FALSE						FALSE	FALSE	FALSE	FALSE	FALSE	FALSE	FALSE	FALSE	0	FALSE	FALSE	FALSE	FALSE	1182.09	58.0593	113.107	53.9724	-6.08834	-6.07901	149	52.5327	-4.8214	-5.35955	432	51.9818	-5.24534	-5.75814	521	51.3559	-9.03567
PV121_Serie1	121	1	M	1	1	DIESTRO	2017-06-30	2	2	1	TRUE	1	0	FALSE				2	1	FALSE	FALSE	FALSE	FALSE	FALSE	FALSE	FALSE	FALSE	0	FALSE	FALSE	FALSE	TRUE	1129.53	32.7591	105.23	46.6237	-1.16448	-2.39205	854	46.1515	-3.10287	-5.10471	226	46.0412	-2.15255	-4.22394	70	45.9201	-2.75178
PV121_Serie2	121	2	M	1	1	DIESTRO	2017-06-30	2	2	1	TRUE	1	0	FALSE				2	1	FALSE	FALSE	FALSE	FALSE	FALSE	FALSE	FALSE	FALSE	0	FALSE	FALSE	FALSE	TRUE	1212.49	26.825	103.447	51.036	-3.36869	-1.4844	634	50.9012	-4.92466	-1.91838	821	50.7975	-3.38634	-2.49252	457	50.783	-5.54841
PV122_Serie1	122	1	M	1	2	DIESTRO	2017-06-30	1	1	1	FALSE	0	0	FALSE				2	2	FALSE	FALSE	TRUE	FALSE	FALSE	FALSE	FALSE	FALSE	0	FALSE	FALSE	TRUE	TRUE	1221.72	26.3756	104.024	45.3287	0.149927	-0.311171	82	44.5671	-2.21371	-0.682328	274	43.9723	-5.00792	-0.161846	869	43.7904	-2.86606
PV122_Serie2	122	2	M	1	2	DIESTRO	2017-06-30	1	1	1	FALSE	0	0	FALSE				2	2	FALSE	FALSE	TRUE	FALSE	FALSE	FALSE	FALSE	FALSE	0	FALSE	FALSE	TRUE	TRUE	1158.88	22.2178	98.7559	49.318	-1.92294	-2.13843	84	49.1269	-1.68787	-0.946218	489	48.5745	-1.33627	-2.21166	277	47.8706	-2.60531
PV123_Serie1	123	1	M	1	1	DIESTRO	2017-06-30	1	1	0	TRUE	1	2	FALSE				0	2	TRUE	FALSE	FALSE	FALSE	FALSE	FALSE	TRUE	FALSE	0	TRUE	TRUE	TRUE	TRUE	896.694	36.0408	84.4991	46.2444	0.771017	-0.85837	601	44.3016	0.393483	-2.57435	698	43.8925	1.36065	-1.29827	500	40.4556	-0.584094
PV123_Serie2	123	2	M	1	1	DIESTRO	2017-06-30	1	1	0	TRUE	1	2	FALSE				0	2	TRUE	FALSE	FALSE	FALSE	FALSE	FALSE	TRUE	FALSE	0	TRUE	TRUE	TRUE	TRUE	679.246	36.5186	74.2098	42.3597	-0.46729	-0.355795	57	36.6642	3.73239	0.897094	237	34.5876	3.04679	-0.12885	146	33.7112	6.50487
PV124_Serie1	124	1	M	1	1	DIESTRO	2017-06-30	2	1	1	FALSE	0	0	TRUE	1	E	D			FALSE	FALSE	FALSE	FALSE	FALSE	FALSE	FALSE	FALSE	0	FALSE	FALSE	FALSE	TRUE	1194.92	43.0448	101.759	46.3265	-0.405878	-1.5448	182	46	4.89996	-0.756964	640	45.9806	-0.984825	-2.076	73	45.6776	2.05878
PV124_Serie2	124	2	M	1	1	DIESTRO	2017-06-30	2	1	1	FALSE	0	0	TRUE	1	E	D			FALSE	FALSE	FALSE	FALSE	FALSE	FALSE	FALSE	FALSE	0	FALSE	FALSE	FALSE	TRUE	1118.8	45.8523	98.6285	48.9005	-1.2322	-1.80975	65	47.1093	-1.32363	-1.70347	478	47.0198	0.885498	-1.92075	578	45.7759	-4.79737
PV125_Serie1	125	1	M	1	1	AMBIDIESTRO	2017-07-10	2	1	2	TRUE	2	3	FALSE						FALSE	FALSE	FALSE	FALSE	FALSE	FALSE	FALSE	FALSE	0	FALSE	FALSE	FALSE	FALSE	1014.37	53.727	86.7164	50.0468	9.72045	0.609047	48	49.4237	10.1461	1.09192	121	49.011	7.29211	-1.2557	360	48.0676	6.90104
PV125_Serie2	125	2	M	1	1	AMBIDIESTRO	2017-07-10	2	1	2	TRUE	2	3	FALSE						FALSE	FALSE	FALSE	FALSE	FALSE	FALSE	FALSE	FALSE	0	FALSE	FALSE	FALSE	FALSE	1012.46	55.6295	85.959	47.7334	7.94968	-0.219136	500	47.7041	8.19356	-1.42193	45	46.9408	6.22923	-1.38318	119	46.1229	8.43616
PV126_Serie1	126	1	M	0	2	DIESTRO	2017-07-10	1	1	0	TRUE	0	1	TRUE	1	D	C			FALSE	FALSE	FALSE	FALSE	FALSE	FALSE	FALSE	FALSE	0	FALSE	FALSE	FALSE	FALSE	1221.73	35.1071	107.026	58.3785	-2.2792	1.38424	932	58.0934	-1.60213	1.65537	211	57.5452	-1.96046	2.31723	353	57.5148	0.201281
PV126_Serie2	126	2	M	0	2	DIESTRO	2017-07-10	1	1	0	TRUE	0	1	TRUE	1	D	C			FALSE	FALSE	FALSE	FALSE	FALSE	FALSE	FALSE	FALSE	0	FALSE	FALSE	FALSE	FALSE	1301.2	30.8927	115.706	64.3277	1.61874	1.4325	434	63.1999	-0.608753	1.00236	250	60.7403	1.82079	1.65365	1134	56.1881	1.57487
PV127_Serie1	38	1	F	0	2	AMBIDIESTRO	2017-05-12	1	1	1	TRUE	0	0	FALSE						FALSE	FALSE	TRUE	FALSE	FALSE	FALSE	FALSE	FALSE	0	FALSE	FALSE	FALSE	FALSE	1057.29	39.6881	99.0909	62.9381	-3.45153	-1.31357	730	56.6781	-4.41717	-3.72063	610	56.4558	-4.757	-4.67867	245	52.3888	-4.91184
PV127_Serie2	38	2	F	0	2	AMBIDIESTRO	2017-05-12	1	1	1	TRUE	0	0	FALSE						FALSE	FALSE	TRUE	FALSE	FALSE	FALSE	FALSE	FALSE	0	FALSE	FALSE	FALSE	FALSE	1000.65	63.6545	97.2797	66.5376	-5.74631	-1.8152	194	64.5718	-4.76024	-2.01152	339	63.7048	-5.09073	-0.571526	269	63.154	-9.34101
PV128_Serie1	39	1	F	1	2	DIESTRO	2017-05-16	0	1	0	FALSE	2		TRUE	3	E	C			FALSE	FALSE	FALSE	FALSE	FALSE	FALSE	FALSE	FALSE	2	FALSE	FALSE	FALSE	FALSE	1423.43	79.0792	123.121	66.2861	-9.1164	-7.48806	282	65.223	-8.88733	-5.91177	507	64.3919	-11.4533	-8.26439	436	64.2244	-7.7328
PV128_Serie2	39	2	F	1	2	DIESTRO	2017-05-16	0	1	0	FALSE	2		TRUE	3	E	C			FALSE	FALSE	FALSE	FALSE	FALSE	FALSE	FALSE	FALSE	2	FALSE	FALSE	FALSE	FALSE	1341.82	86.2352	127.893	65.8533	-9.23015	-4.41092	118	63.294	-10.0509	-5.3401	190	62.6344	-14.4934	-5.56459	327	61.8373	-6.09212
PV129_Serie1	40	1	F	2	0	DIESTRO	2017-05-16	0	1	0	TRUE	1	0	FALSE						FALSE	FALSE	FALSE	FALSE	FALSE	FALSE	FALSE	FALSE	0	FALSE	FALSE	FALSE	FALSE	924.363	15.5932	81.4216	61.7664	5.23359	-7.25393	1022	61.3575	1.38673	-6.47844	1577	60.4689	6.93361	-6.16772	291	60.0085	0.855729
PV129_Serie2	40	2	F	2	0	DIESTRO	2017-05-16	0	1	0	TRUE	1	0	FALSE						FALSE	FALSE	FALSE	FALSE	FALSE	FALSE	FALSE	FALSE	0	FALSE	FALSE	FALSE	FALSE	937.132	50.9311	80.9726	62.3057	3.85779	-6.34742	361	61.6327	0.383421	-4.71536	58	61.4451	7.09376	-8.70051	518	61.3097	6.93865
PV130_Serie1	127	1	F	2	0	DIESTRO	2017-07-11	2	0	2	FALSE	0	2	TRUE	3	F	C	2	2	FALSE	FALSE	FALSE	FALSE	FALSE	FALSE	FALSE	FALSE	2	FALSE	TRUE	TRUE	TRUE	1085.1	55.7032	105.247	49.8615	-6.66627	0.350084	335	47.2315	-8.17742	0.336038	420	46.8196	-7.34345	0.357028	155	44.975	-5.09998
PV130_Serie2	127	2	F	2	0	DIESTRO	2017-07-11	2	0	2	FALSE	0	2	TRUE	3	F	C	2	2	FALSE	FALSE	FALSE	FALSE	FALSE	FALSE	FALSE	FALSE	2	FALSE	TRUE	TRUE	TRUE	923.855	54.6013	88.874	40.1177	-9.12771	-0.0139513	326	39.5275	-9.03612	-0.330757	170	36.6465	-8.78804	-0.187769	252	36.1714	-8.94418
PV131_Serie1	128	1	M	0	2	DIESTRO	2017-07-11	1	2	0	TRUE	2	1	FALSE						FALSE	FALSE	FALSE	FALSE	FALSE	FALSE	TRUE	FALSE	0	FALSE	FALSE	FALSE	FALSE	1244.52	64.6838	107.669	61.0942	0.118955	-7.82688	464	59.5503	2.01806	-8.11848	547	58.9804	1.21436	-6.8308	383	58.9006	0.0401807
PV131_Serie2	128	2	M	0	2	DIESTRO	2017-07-11	1	2	0	TRUE	2	1	FALSE						FALSE	FALSE	FALSE	FALSE	FALSE	FALSE	TRUE	FALSE	0	FALSE	FALSE	FALSE	FALSE	1099.83	65.7791	104.782	59.4252	1.9968	-3.67719	360	58.4439	1.56679	-4.93543	283	57.9399	0.275838	-6.20787	211	57.0703	2.73729
PV132_Serie1	129	1	M	1	2	DIESTRO	2017-07-14	1	1	1	TRUE	2	0	FALSE						FALSE	FALSE	FALSE	FALSE	TRUE	FALSE	TRUE	FALSE	0	FALSE	FALSE	FALSE	TRUE	1152.01	36.1359	102.2	53.7907	5.8773	-6.02286	775	53.6972	3.81988	-6.85238	243	51.9115	4.56829	-3.24068	97	49.7199	4.65442
PV132_Serie2	129	2	M	1	2	DIESTRO	2017-07-14	1	1	1	TRUE	2	0	FALSE						FALSE	FALSE	FALSE	FALSE	TRUE	FALSE	TRUE	FALSE	0	FALSE	FALSE	FALSE	TRUE	1046.71	32.5875	95.1431	54.2718	3.39056	-5.63067	269	53.2902	2.72501	-6.03823	546	52.4978	2.67197	-3.98441	119	48.1414	0.681695
PV133_Serie1	133	1	F	1	0	DIESTRO	2017-07-17	0	0	0	TRUE	1	3	FALSE				0	2	TRUE	FALSE	FALSE	FALSE	TRUE	FALSE	FALSE	TRUE	3	FALSE	FALSE	FALSE	TRUE	916.956	21.9368	112.457	70.3113	6.98579	-7.3073	106	38.6849	10.8348	-5.97448	307	38.4653	11.5974	-4.22265	483	36.3523	8.76686
PV133_Serie2	133	2	F	1	0	DIESTRO	2017-07-17	0	0	0	TRUE	1	3	FALSE				0	2	TRUE	FALSE	FALSE	FALSE	TRUE	FALSE	FALSE	TRUE	3	FALSE	FALSE	FALSE	TRUE	1304.76	22.5894	79.8347	30.6584	6.74242	-1.07771	122	25.6919	7.75334	1.17394	1142	24.1479	7.17287	1.08114	1431	23.9431	7.91712
PV134_Serie1	134	1	M	1	0	DIESTRO	2017-07-18	2	2	2	FALSE	0	1	TRUE	1	E	E	0	0	FALSE	FALSE	FALSE	FALSE	FALSE	FALSE	FALSE	TRUE	2	TRUE	FALSE	TRUE	TRUE	1186.45	33.44	101.458	56.0977	-1.30467	-2.4121	241	56.027	-2.68266	-1.97405	840	55.1361	-1.44172	-2.06831	88	54.2573	-1.78498
PV134_Serie2	134	2	M	1	0	DIESTRO	2017-07-18	2	2	2	FALSE	0	1	TRUE	1	E	E	0	0	FALSE	FALSE	FALSE	FALSE	FALSE	FALSE	FALSE	TRUE	2	TRUE	FALSE	TRUE	TRUE	1169.8	45.2011	100.118	55.5105	1.97911	0.595028	707	55.4782	0.776318	-1.33677	387	54.9058	1.61061	-1.52502	598	54.5366	3.15396
PV135_Serie1	135	1	F	1	2	DIESTRO	2017-07-18	0	1	0	TRUE	1	1	TRUE	1	E	D	1	1	FALSE	FALSE	FALSE	FALSE	FALSE	FALSE	FALSE	TRUE	2	TRUE	FALSE	TRUE	TRUE	1197.09	38.467	102.685	60.626	1.91761	2.75365	517	60.2685	-0.8646	0.783119	767	60.1737	0.118269	3.12023	886	59.9524	-0.188572
PV135_Serie2	135	2	F	1	2	DIESTRO	2017-07-18	0	1	0	TRUE	1	1	TRUE	1	E	D	1	1	FALSE	FALSE	FALSE	FALSE	FALSE	FALSE	FALSE	TRUE	2	TRUE	FALSE	TRUE	TRUE	1228.46	48.3647	105.007	58.7785	-3.13514	0.949593	390	58.4873	-1.79256	0.525124	174	57.479	-0.102031	0.939834	282	57.1311	-3.61672
PV136_Serie1	136	1	F	1	1	AMBIDIESTRO	2017-07-21	1	1	1	TRUE	1	2	TRUE	3	E	C	2	2	TRUE	FALSE	FALSE	FALSE	FALSE	FALSE	FALSE	TRUE	3	FALSE	TRUE	FALSE	TRUE	813.345	28.5184	85.8954	45.287	-7.75431	-5.14397	153	33.0254	-5.94509	-8.22935	866	32.7086	-5.33596	-6.88329	544	32.157	-6.78166
PV136_Serie2	136	2	F	1	1	AMBIDIESTRO	2017-07-21	1	1	1	TRUE	1	2	TRUE	3	E	C	2	2	TRUE	FALSE	FALSE	FALSE	FALSE	FALSE	FALSE	TRUE	3	FALSE	TRUE	FALSE	TRUE	553.753	13.9274	60.645	32.885	-2.88008	-3.08645	127	30.0208	-3.2929	-5.7698	334	26.5544	-5.17131	-7.0238	522	26.1826	-5.48943
PV137_Serie1	137	1	F	1	0	DIESTRO	2017-07-21	1	0	2	FALSE	0	0	TRUE	1	E	A	0	2	FALSE	FALSE	FALSE	FALSE	FALSE	FALSE	FALSE	FALSE	3	FALSE	TRUE	TRUE	TRUE	558.422	18.9167	59.1231	33.8901	2.73586	1.16329	642	30.3587	3.72892	2.13868	366	29.7661	3.13677	0.287491	767	27.6849	3.37042
PV137_Serie2	137	2	F	1	0	DIESTRO	2017-07-21	1	0	2	FALSE	0	0	TRUE	1	E	A	0	2	FALSE	FALSE	FALSE	FALSE	FALSE	FALSE	FALSE	FALSE	3	FALSE	TRUE	TRUE	TRUE	489.199	13.9135	46.706	26.2086	0.75102	2.06945	660	25.3413	0.583446	2.0373	524	22.318	2.95519	1.99642	381	22.2752	2.5681
PV138_Serie1	138	1	F	1	2	DIESTRO	2017-07-24	1	1	0	TRUE	1	3	TRUE	1	F	C	0	1	FALSE	FALSE	FALSE	FALSE	FALSE	FALSE	FALSE	FALSE	2	TRUE	FALSE	TRUE	TRUE	1334.94	52.8897	118.443	59.5516	-1.1647	-1.24471	159	59.4249	1.95414	-0.957959	588	57.4252	-1.20016	-0.0578964	485	57.1684	2.04244
PV138_Serie2	138	2	F	1	2	DIESTRO	2017-07-24	1	1	0	TRUE	1	3	TRUE	1	F	C	0	1	FALSE	FALSE	FALSE	FALSE	FALSE	FALSE	FALSE	FALSE	2	TRUE	FALSE	TRUE	TRUE	1202.39	45.1347	114.105	62.7165	-5.21373	-1.53551	660	62.1382	0.7866	0.0127503	321	62.1203	-1.93283	-1.96478	550	61.6607	2.1845
PV139_Serie1	139	1	F	1	1	DIESTRO	2017-07-24	0	1	0	TRUE	0	0	TRUE	1	G	C	1	2	TRUE	FALSE	FALSE	FALSE	TRUE	TRUE	FALSE	TRUE	3	TRUE	TRUE	TRUE	TRUE	604.311	23.207	65.3373	39.2473	-3.27048	-0.609816	67	34.7679	-2.88369	-2.67157	183	29.7015	-1.89341	-1.02979	429	29.3496	-1.39186
PV139_Serie2	139	2	F	1	1	DIESTRO	2017-07-24	0	1	0	TRUE	0	0	TRUE	1	G	C	1	2	TRUE	FALSE	FALSE	FALSE	TRUE	TRUE	FALSE	TRUE	3	TRUE	TRUE	TRUE	TRUE	761.809	28.5964	71.6154	44.7794	-6.5431	-1.51083	69	39.5167	-7.94192	-5.11038	735	39.0788	-7.20731	-4.74154	623	38.6893	-7.18498
PV140_Serie1	140	1	F	1	2	DIESTRO	2017-07-19	1	1	1	FALSE	0	0	FALSE				2	0	FALSE	FALSE	FALSE	FALSE	FALSE	FALSE	FALSE	FALSE	0	FALSE	TRUE	FALSE	TRUE	1135.39	59.0119	107.487	57.8193	-2.95471	-0.801169	339	57.3152	-4.77215	-1.42858	179	57.241	0.120365	-0.549031	77	55.7405	-3.80056
PV140_Serie2	140	2	F	1	2	DIESTRO	2017-07-19	1	1	1	FALSE	0	0	FALSE				2	0	FALSE	FALSE	FALSE	FALSE	FALSE	FALSE	FALSE	FALSE	0	FALSE	TRUE	FALSE	TRUE	1140.84	63.8052	105.991	61.8765	-6.27944	-2.26882	295	61.8762	-5.22533	-2.31443	455	61.8732	-6.42217	-4.32526	215	61.8027	-5.33409
PV141_Serie1	115	1	M	0	2	DIESTRO	2017-06-23	1	1	0	TRUE	0	0	FALSE						FALSE	FALSE	FALSE	FALSE	FALSE	FALSE	FALSE	FALSE	1	FALSE	FALSE	FALSE	FALSE	1233.13	65.8723	126.407	84.2985	-4.05049	4.82685	522	77.9619	-2.01502	4.80905	444	68.8453	-2.32937	4.61383	366	66.8678	3.02497
PV141_Serie2	115	2	M	0	2	DIESTRO	2017-06-23	1	1	0	TRUE	0	0	FALSE						FALSE	FALSE	FALSE	FALSE	FALSE	FALSE	FALSE	FALSE	1	FALSE	FALSE	FALSE	FALSE	1310.76	81.1112	122.78	73.9969	3.89589	5.73057	415	69.1615	8.88766	6.08249	219	68.1553	4.88682	5.51574	345	67.9039	6.71874
PV142_Serie1	116	1	M	1	2	DIESTRO	2017-06-27	2	1	1	TRUE	0	0	FALSE						FALSE	FALSE	FALSE	FALSE	FALSE	FALSE	FALSE	FALSE	0	FALSE	FALSE	FALSE	FALSE	1193.34	78.7164	125.382	58.4003	-4.95505	-0.866456	286	45.3617	-6.02591	-0.136803	216	44.4651	-6.14099	-4.82384	147	42.8299	-2.96587
PV142_Serie2	116	2	M	1	2	DIESTRO	2017-06-27	2	1	1	TRUE	0	0	FALSE						FALSE	FALSE	FALSE	FALSE	FALSE	FALSE	FALSE	FALSE	0	FALSE	FALSE	FALSE	FALSE	1311.73	85.3991	125.405	60.4836	-9.55596	-1.28842	494	60.4308	-6.10171	-1.54919	349	58.6114	-3.30276	0.0539162	211	54.2616	0.0111114
PV143_Serie1	117	1	F	0	2	DIESTRO	2017-06-27	1	1	1	FALSE	0	0	FALSE						FALSE	FALSE	FALSE	FALSE	TRUE	FALSE	FALSE	TRUE	1	FALSE	FALSE	FALSE	FALSE	1133.1	50.6754	102.907	60.3732	2.58488	3.2045	527	58.242	4.53436	2.87419	613	55.9807	4.78226	3.68094	440	51.7376	3.56356
PV143_Serie2	117	2	F	0	2	DIESTRO	2017-06-27	1	1	1	FALSE	0	0	FALSE						FALSE	FALSE	FALSE	FALSE	TRUE	FALSE	FALSE	TRUE	1	FALSE	FALSE	FALSE	FALSE	1039.51	51.3591	91.513	47.3747	-5.55999	0.0350393	488	47.148	-9.24945	-3.42964	399	45.4524	-8.78201	-0.994892	311	44.5272	-8.28337
PV146_Serie1	141	1		0	1		2017-07-25	0	1	0	FALSE	0		FALSE						FALSE	FALSE	FALSE	FALSE	FALSE	FALSE	FALSE	FALSE	0	FALSE	FALSE	FALSE	FALSE	839.63	23.2972	71.3849	42.8665	2.64285	5.15543	336	41.4105	0.134311	3.1943	131	40.8916	2.11497	6.05518	933	39.2187	3.53396
PV146_Serie2	141	2		0	1		2017-07-25	0	1	0	FALSE	0		FALSE						FALSE	FALSE	FALSE	FALSE	FALSE	FALSE	FALSE	FALSE	0	FALSE	FALSE	FALSE	FALSE	645.646	23.4951	70.9782	40.8859	1.7429	2.33524	92	38.6445	1.98455	2.6865	239	33.6119	2.38589	4.20802	375	30.189	4.53002
PV147_Serie1	142	1		0	1		2017-07-25	1	1	1	FALSE	0		FALSE						FALSE	FALSE	FALSE	FALSE	FALSE	TRUE	FALSE	TRUE	0	FALSE	FALSE	FALSE	FALSE	991.059	72.4458	97.6992	57.6869	1.476	-6.79009	297	56.4501	5.01909	-4.87145	118	52.2478	3.88256	-3.15101	180	52.1067	2.09131
PV147_Serie2	142	2		0	1		2017-07-25	1	1	1	FALSE	0		FALSE						FALSE	FALSE	FALSE	FALSE	FALSE	TRUE	FALSE	TRUE	0	FALSE	FALSE	FALSE	FALSE	1050.58	72.354	101.243	57.5271	0.0775712	-3.5836	248	57.0067	1.49251	-3.70784	384	56.1652	3.8085	0.543174	183	51.6514	0.737592
PV148_Serie1	143	1	F	1	1	DIESTRO	2017-07-25	1	1	1	TRUE	0	0	TRUE	2	A	E	2	0	TRUE	FALSE	FALSE	FALSE	FALSE	FALSE	FALSE	TRUE	0	FALSE	FALSE	FALSE	TRUE	822.131	31.1413	75.5276	52.7254	-9.66252	2.37254	629	51.4393	-7.99121	1.66746	741	50.4052	-8.88065	1.67199	515	48.9623	-8.82948
PV148_Serie2	143	2	F	1	1	DIESTRO	2017-07-25	1	1	1	TRUE	0	0	TRUE	2	A	E	2	0	TRUE	FALSE	FALSE	FALSE	FALSE	FALSE	FALSE	TRUE	0	FALSE	FALSE	FALSE	TRUE	831.963	30.4525	73.338	53.2393	-7.43115	2.52695	183	51.4888	-7.28449	1.34918	59	50.4869	-6.39713	2.82872	521	50.4287	-5.31131
PV149_Serie1	149	1	F	0	2	DIESTRO	2017-11-06	1	1	1	TRUE	1	0	TRUE	2	E	B	1	2	TRUE	FALSE	FALSE	FALSE	FALSE	FALSE	FALSE	TRUE	0	FALSE	FALSE	FALSE	TRUE	750.311	20.148	79.4432	41.1578	-4.15048	-3.06921	530	37.5503	-2.1045	-2.42297	373	36.433	-3.08126	-3.37803	705	35.9706	-2.50702
PV149_Serie2	149	2	F	0	2	DIESTRO	2017-11-06	1	1	1	TRUE	1	0	TRUE	2	E	B	1	2	TRUE	FALSE	FALSE	FALSE	FALSE	FALSE	FALSE	TRUE	0	FALSE	FALSE	FALSE	TRUE	1033.77	28.4316	96.3998	53.3575	0.731435	2.42569	530	51.434	0.941325	2.7987	353	50.447	0.699927	2.1439	844	47.8244	2.09783
PV150_Serie1	150	1	F	1	0	DIESTRO	2017-11-06	1	1	1	TRUE	1	3	FALSE	1			0	0	TRUE	FALSE	FALSE	FALSE	FALSE	FALSE	FALSE	FALSE	0	TRUE	TRUE	FALSE	TRUE	1299.96	44.5803	114.387	79.0496	6.01353	-4.80772	90	78.1306	5.76652	-2.15983	334	77.8262	7.04311	-5.16085	452	77.4125	5.77375
PV150_Serie2	150	2	F	1	0	DIESTRO	2017-11-06	1	1	1	TRUE	1	3	FALSE	1			0	0	TRUE	FALSE	FALSE	FALSE	FALSE	FALSE	FALSE	FALSE	0	TRUE	TRUE	FALSE	TRUE	1302.52	52.3522	110.57	81.0703	6.32157	-2.85598	564	80.657	0.643514	-5.38216	141	80.6448	-2.12866	-4.27461	459	80.3817	-1.50227
PV151_Serie1	151	1	F	1	1	DIESTRO	2017-11-06	1	0	1	FALSE	0	0	TRUE	3	E	E	2	2	FALSE	FALSE	FALSE	FALSE	FALSE	FALSE	FALSE	FALSE	0	FALSE	TRUE	TRUE	TRUE	1008.82	24.3912	89.8008	57.0982	-4.71774	1.41423	723	56.613	-3.11347	1.58487	873	56.5451	-2.60187	1.80687	544	56.3726	-2.83353
PV151_Serie2	151	2	F	1	1	DIESTRO	2017-11-06	1	0	1	FALSE	0	0	TRUE	3	E	E	2	2	FALSE	FALSE	FALSE	FALSE	FALSE	FALSE	FALSE	FALSE	0	FALSE	TRUE	TRUE	TRUE	932.961	39.4654	84.6324	58.9939	-3.56718	-1.81279	261	57.2644	-8.3424	-3.94687	551	56.6997	-5.49781	-3.9002	158	55.0266	-8.76561
PV152_Serie1	152	1	M	1	2	DIESTRO	2017-11-21	2	2	1	FALSE	0	0	TRUE	1	E	C	0	2	FALSE	FALSE	FALSE	FALSE	FALSE	FALSE	FALSE	FALSE	0	FALSE	FALSE	FALSE	FALSE	551.199	24.476	61.351	43.8761	9.41989	9.21532	76	40.7286	12.1375	11.4807	287	40.2242	10.38	10.9593	180	38.5161	13.0022
PV152_Serie2	152	2	M	1	2	DIESTRO	2017-11-21	2	2	1	FALSE	0	0	TRUE	1	E	C	0	2	FALSE	FALSE	FALSE	FALSE	FALSE	FALSE	FALSE	FALSE	0	FALSE	FALSE	FALSE	FALSE	646.674	36.5766	66.1519	53.3177	19.4006	12.2394	192	51.9304	20.8757	14.1213	341	48.9188	21.1218	16.8291	412	45.201	15.6324
PV153_Serie1	153	1	M	1	2	DIESTRO	2017-11-21	1	1	1	TRUE	0	0	FALSE	1	E	C	0	0	TRUE	FALSE	FALSE	FALSE	FALSE	FALSE	FALSE	TRUE	0	FALSE	FALSE	FALSE	TRUE	1021.33	45.923	99.2527	62.075	8.41333	7.12208	153	62.0081	7.74187	7.35108	55	57.8017	9.29224	8.83425	252	55.1888	7.81989
PV153_Serie2	153	2	M	1	2	DIESTRO	2017-11-21	1	1	1	TRUE	0	0	FALSE	1	E	C	0	0	TRUE	FALSE	FALSE	FALSE	FALSE	FALSE	FALSE	TRUE	0	FALSE	FALSE	FALSE	TRUE	852.405	34.9346	81.1135	53.058	-6.73447	-9.64672	239	52.1749	-5.55522	-9.58989	142	50.0945	-5.21839	-9.52038	52	46.7754	-9.96174
PV154_Serie1	154	1	M	1	1	DIESTRO	2017-11-21	1	1	1	TRUE	2	1	TRUE	1	D	E	1	2	TRUE	FALSE	FALSE	FALSE	FALSE	FALSE	FALSE	TRUE	0	FALSE	FALSE	TRUE	TRUE	1060.92	40.5549	93.1523	46.8817	7.50033	7.32164	271	46.381	8.95969	9.53112	384	45.9755	10.3367	10.3734	481	45.4239	10.5702
PV154_Serie2	154	2	M	1	1	DIESTRO	2017-11-21	1	1	1	TRUE	2	1	TRUE	1	D	E	1	2	TRUE	FALSE	FALSE	FALSE	FALSE	FALSE	FALSE	TRUE	0	FALSE	FALSE	TRUE	TRUE	944.206	47.8807	91.8685	42.6268	9.19923	-2.39258	328	42.4233	7.4557	-2.00361	239	40.8552	5.98834	-2.30942	145	39.0459	7.70586
[truncated: 179 more columns]

## Sheet: Variable_View
			Objective Variables	Subjective Variables	Anonymized
Patient Characterisation Data	Identification	ID	X
		Series	X
		Gender	X
		Age	X		X
		Educational Level	X		X
		Dominant Size	X
	Temporary	Date	X
	Anthropometric	Weight	X		X
		Height	X		X
		BMI	X		X
	Daily Life Activities	Physical Activity		X
		Physical Activity Intensity		X	X
		Workplace Intensity		X	X
Clinical Data: Assessed and Reported Data		Traffic Accident	X
		Time Since Traffic Accident	X		X
		Type of Scope	X		X
		Head Position Scope	X		X
		Time since Pain		X	X
		Pain Periodicity		X	X
		Paravertebral Pain		X
		Surgery	X
		Rheumatic Disease	X
		SHORT Neck	X
		Spurling	X
		Distraction	X
		Valsalva	X
		Jackson Compression	X
		Scale WDQ	X		X
		Spinal Column Alterations	X
		Feeling of Instability		X
		Limitation of Mobility		X
		Contracture	X
Clinical Data: Measured Data		Rx.01.Length	X
		Rx.02.Vel	X
		Rx.03.MaxRange	X
		1º Max. Rx	X
		Acoplado Rz	X
		Acoplado Ry	X
		Frame	X
		2º Max. Rx	X
		Acoplado Rz	X
		Acoplado Ry	X
		Frame	X
		3º Max. Rx	X
		Acoplado Rz	X
		Acoplado Ry	X
		Frame	X
		4º Max. Rx	X
		Acoplado Rz	X
		Acoplado Ry	X
		Frame	X
		5º Max. Rx	X
		Acoplado Rz	X
		Acoplado Ry	X
		Frame	X
		Media Max.Rx	X
		µ_Aco.Rz_Flex	X
		µ_Aco.Ry_Flex	X
		Rx.05.Max	X
		Rx.06.MaxMean	X
		Rx.07.MaxStd	X
		Rx.08.MaxCV[%]	X
		1º Min. Rx	X
		Acoplado Rz	X
		Acoplado Ry	X
		Frame	X
		2º Min. Rx	X
		Acoplado Rz	X
		Acoplado Ry	X
		Frame	X
		3º Min. Rx	X
		Acoplado Rz	X
		Acoplado Ry	X
		Frame	X
		4º Min. Rx	X
		Acoplado Rz	X
		Acoplado Ry	X
		Frame	X
		5º Min. Rx	X
		Acoplado Rz	X
		Acoplado Ry	X
		Frame	X
		µ_Aco.Rz_Ext	X
		µ_Aco.Ry_Ext	X
		Rx.10.Min	X
		Rx.11.MinMean	X
		Rx.12.MinStd	X
		Rx.13.MinCV[%]	X
		1º Max.Vel.Rx	X
		Rx	X
		frame	X
		2º Max.Vel.Rx	X
		Rx	X
		frame	X
		3º Max.Vel.Rx	X
		Rx	X
		frame	X
		4º Max.Vel.Rx	X
		Rx	X
		frame	X
		5º Max.Vel.Rx	X
		Rx	X
		frame	X
			X
		Rx.15.Speed.Max	X
		Rx.16.Speed.MaxMean	X
		Rx.17.Speed.MaxStd	X
		Rx.18.Speed.MaxCV[%]	X
		1º Min.Vel.Rx	X
		Rx	X
		frame	X
		2º Min.Vel.Rx	X
		Rx	X
		frame	X
		3º Min.Vel.Rx	X
		Rx	X
		frame	X
		4º Min.Vel.Rx	X
		Rx	X
		frame	X
		5º Min.Vel.Rx	X
		Rx	X
		frame	X
		Rx.20.Speed.Min	X
		Rx.21.Speed.MinMean	X
		Rx.22.Speed.MinStd	X
		Rx.23.Speed.MinCV[%]	X
		Rz.01.Length	X
		Rz.02.Vel	X
		Rz.03.MaxRange	X
		1º Max. Rz	X
		Acoplado Rx	X
		Acoplado Ry	X
		Frame	X
		2º Max. Rz	X
		Acoplado Rx	X
		Acoplado Ry	X
		Frame	X
		3º Max. Rz	X
		Acoplado Rx	X
		Acoplado Ry	X
		Frame	X
		4º Max. Rz	X
		Acoplado Rx	X
		Acoplado Ry	X
		Frame	X
		5º Max. Rz	X
		Acoplado Rx	X
		Acoplado Ry	X
		Frame	X
		µ_Aco.Rx_Right.Lat	X
		µ_Aco.Ry_Right.Lat	X
		Rz.05.Max	X
		Rz.06.MaxMean	X
		Rz.07.MaxStd	X
		Rz.08.MaxCV[%]	X
			X
		1º Min. Rz	X
		Acoplado Rx	X
		Acoplado Ry	X
		Frame	X
		2º Min. Rz	X
		Acoplado Rx	X
		Acoplado Ry	X
		Frame	X
		3º Min. Rz	X
		Acoplado Rx	X
		Acoplado Ry	X
		Frame	X
		4º Min. Rz	X
		Acoplado Rx	X
		Acoplado Ry	X
		Frame	X
		5º Min. Rz	X
		Acoplado Rx	X
		Acoplado Ry	X
		Frame	X
		µ_Aco.Rx_Left.Lat	X
		µ_Aco.Ry_Left.Lat	X
		Rz.10.Min	X
		Rz.11.MinMean	X
		Rz.12.MinStd	X
		Rz.13.MinCV[%]	X
		1º Max.Vel.Rz	X
		Rz	X
		frame	X
		2º Max.Vel.Rz	X
		Rz	X
		frame	X
		3º Max.Vel.Rz	X
		Rz	X
		frame	X
		4º Max.Vel.Rz	X
		Rz	X
		frame	X
		5º Max.Vel.Rz	X
		Rz	X
		frame	X
		Rz.15.Speed.Max	X
		Rz.16.Speed.MaxMean	X
		Rz.17.Speed.MaxStd	X
		Rz.18.Speed.MaxCV[%]	X
		1º Min.Vel.Rz	X
		Rz	X
		frame	X
		2º Min.Vel.Rz	X
		Rz	X
		frame	X
		3º Min.Vel.Rz	X
		Rz	X
		frame	X
		4º Min.Vel.Rz	X
		Rz	X
		frame	X
		5º Min.Vel.Rz	X
		Rz	X
		frame	X
		Rz.20.Speed.Min	X
		Rz.21.Speed.MinMean	X
		Rz.22.Speed.MinStd	X
		Rz.23.Speed.MinCV[%]	X
		Ry.01.Length	X
		Ry.02.Vel	X
		Ry.03.MaxRange	X
		1º Max. Ry	X
		Acoplado Rx	X
		Acoplado Rz	X
		Frame	X
		2º Max. Ry	X
PAIN				X
