# Supplementary material
Source: MDPI journal article supplement (https://www.mdpi.com/2076-3417/10/17/5942)
Supplement: s1 [file s1 › 3. Filtered database. Supplementary material.xls]

## Sheet: DATOS_V01
Patient Characterisation Data			Clinical Data: Assessed And Reported Data				(Rx= Flexo-Extension; Ry= Rotation; Rz= Lateralization) Clinical Data: Measured Data With Sensors																					PAIN
Gender	Age	Educational Level	Contracture	Traffic Accident	Spinal Column Alterations	Scale WDQ	Rx.LT	Rx.RT	Rx.max	Rx.min	Rx.V.mean	Rx.Vmax	Rx.Vmin	Rz.LT	Rz.RT	Rz.max	Rz.min	Rz.V.mean	Rz.Vmax	Rz.Vmin	Ry.LT	Ry.RT	Ry.max	Ry.min	Ry.V.mean	Ry.Vmax	Ry.Vmin
F	1	2	FALSE	FALSE	FALSE	0	1553.73	136.088	76.4013	-59.6866	73.0137	179.22	-159.574	1149.88	91.7748	48.4797	-43.2952	53.9343	112.654	-119.616	1959.98	167.1	85.7561	-81.3439	103.813	228.069	-242.899	FALSE
F	1	2	FALSE	FALSE	FALSE	0	1347.92	129.752	73.7302	-56.0222	84.2452	171.987	-167.098	1118.28	90.9751	50.7029	-40.2722	51.486	109.337	-118.464	2024.08	174.252	90.6608	-83.591	122.523	283.727	-249.848	FALSE
F	0	2	FALSE	FALSE	FALSE	0	1581.68	135.135	82.9657	-52.1693	69.1296	175.535	-169.359	1204.08	95.7862	54.1525	-41.6337	46.7423	113.578	-117.58	1968.61	169.596	83.9153	-85.6803	97.456	205.1	-270.404	TRUE
F	0	2	FALSE	FALSE	FALSE	0	1637.89	139.416	81.6892	-57.7269	77.5518	190.131	-178.001	1227.31	96.6736	53.8234	-42.8503	48.2434	118.124	-115.676	1808.25	170.08	83.1511	-86.9288	89.3402	212.3	-190.67	TRUE
F	1	2	FALSE	FALSE	FALSE	0	1456.27	127.418	66.8491	-60.5687	41.3713	111.377	-103.822	897.59	83.9109	38.4285	-45.4824	26.9709	76.2526	-85.5756	1915.76	163.922	82.8457	-81.0767	55.305	127.826	-122.523	TRUE
F	1	2	FALSE	FALSE	FALSE	0	1396.32	124.034	69.3839	-54.6497	42.5187	121.479	-108.387	902.067	84.1355	41.1309	-43.0046	26.9757	78.0712	-76.3583	1957.52	166.795	83.3815	-83.4133	56.3802	103.593	-104.722	TRUE
F	1	2	FALSE	FALSE	FALSE	1	1387.79	118.949	73.3373	-45.6115	35.9903	113.081	-99.9389	1206.54	96.8766	52.1077	-44.7689	39.0214	98.9677	-96.2929	1495.59	153.999	76.5664	-77.4329	54.8236	128.509	-145.455	FALSE
F	1	2	FALSE	FALSE	FALSE	1	1400.28	119.412	71.6467	-47.7649	46.0619	138.446	-100.438	1170.02	93.1947	49.6287	-43.566	39.7965	94.8919	-111.312	1754.63	151.659	73.7721	-77.8872	58.4878	112.904	-130.065	FALSE
F	1	2	TRUE	FALSE	FALSE	2	1609.8	138.915	67.7001	-71.2151	61.1627	142.22	-112.429	1408.42	115.905	57.3412	-58.5643	49.1081	106.601	-111.902	2146.44	184.534	98.7167	-85.8171	74.3227	157.225	-155.785	TRUE
F	1	2	TRUE	FALSE	FALSE	2	1632.75	142.237	71.308	-70.9286	52.1312	123.974	-106.697	1278.75	105.618	53.5773	-52.0406	48.4376	87.8993	-101.846	2024.17	171.932	87.1068	-84.8249	76.7894	142.61	-178.431	TRUE
F	1	1	TRUE	TRUE	FALSE	3	1074.52	108.357	68.3863	-39.9706	80.9123	154.112	-129.768	1015.04	96.5493	42.1047	-54.4446	55.5271	129.228	-118.898	1617.53	151.744	66.9747	-84.7693	134.346	248.602	-228.301	TRUE
F	1	1	TRUE	TRUE	FALSE	3	1120.46	119.439	65.6278	-53.811	104.912	196.735	-177.004	960.359	94.1955	44.5583	-49.6372	59.7238	121.466	-114.893	1562.27	164.765	81.2188	-83.5465	158.768	307.944	-298.691	TRUE
M	0	2	TRUE	FALSE	FALSE	0	1646.02	141.604	67.9902	-73.6141	62.9213	137.343	-133.934	1320.15	105.384	57.9084	-47.4755	56.5132	106.386	-121.062	1853.77	161.099	83.9707	-77.1283	85.8225	235.531	-222.66	FALSE
M	0	2	TRUE	FALSE	FALSE	0	1592.48	137.215	64.7627	-72.452	67.2501	147.99	-114.41	1310.54	103.442	58.0957	-45.3463	55.7203	87.252	-99.7364	2043.47	165.416	89.8191	-75.5968	105.117	237.526	-244.317	FALSE
F	1	2	FALSE	TRUE	FALSE	2	1234.41	115.95	60.8108	-55.1395	74.1832	170.141	-153.977	1135.94	91.6751	47.9631	-43.712	62.4142	109.644	-126.664	1587.05	137.852	69.1986	-68.6536	97.2456	198.429	-199.81	TRUE
F	1	2	FALSE	TRUE	FALSE	2	1241.53	117.22	59.3988	-57.8217	89.9658	189.242	-184.958	942.972	88.3324	45.5575	-42.775	67.9375	130.165	-135.148	1451.07	136.05	71.7679	-64.2821	115.531	258.939	-245.95	TRUE
F	1	2	TRUE	TRUE	FALSE	1	1164.01	106.177	55.3862	-50.7906	34.9764	86.6937	-75.1187	852.149	80.4008	37.9978	-42.403	24.1539	55.4743	-55.4661	1345.34	119.67	70.6449	-49.025	36.0875	72.8046	-75.1679	TRUE
F	1	2	TRUE	TRUE	FALSE	1	1125.69	102.717	54.4285	-48.2881	31.444	66.9554	-71.7185	826.9	77.5449	39.4398	-38.1051	27.5633	59.967	-69.8792	1377.19	121.928	68.0425	-53.8859	37.141	69.3366	-108.771	TRUE
F	1	0	TRUE	FALSE	TRUE	1	957.872	93.0461	48.7939	-44.2521	51.8329	134.316	-111.277	739.621	66.2532	33.9407	-32.3126	39.9363	78.8492	-86.5471	1638.71	129.785	62.5491	-67.2361	76.29	146.027	-146.778	TRUE
F	1	0	TRUE	FALSE	TRUE	1	913.574	87.9236	44.3739	-43.5497	49.7589	117.281	-89.2556	829.145	69.7709	36.185	-33.5859	44.1975	81.7201	-98.9147	1304.75	122.233	60.7376	-61.4955	77.6638	149.35	-170.526	TRUE
F	1	1	FALSE	FALSE	FALSE	1	897.392	84.3635	40.8689	-43.4946	38.9493	122.6	-72.1185	672.795	54.6725	26.2362	-28.4363	33.045	80.2386	-80.565	1222.19	104.912	44.6779	-60.2344	67.301	146.649	-157.195	FALSE
F	1	1	FALSE	FALSE	FALSE	1	820.051	80.1779	45.1655	-35.0124	53.3887	126.642	-88.0531	598.796	51.4722	27.5557	-23.9165	37.5185	80.6912	-91.4261	1086.16	104.19	43.2756	-60.9142	84.0677	166.179	-187.058	FALSE
F	1	2	FALSE	FALSE	FALSE	1	1528.46	133.081	68.0603	-65.0204	57.6341	120.811	-116.775	747.964	66.3274	33.7437	-32.5837	33.6921	82.3785	-74.6876	1778.8	157.108	76.7509	-80.357	74.7393	141.539	-159.329	FALSE
F	1	2	FALSE	FALSE	FALSE	1	1453.84	127.054	71.15	-55.9044	56.9688	120.242	-116.642	721.067	65.9307	31.7821	-34.1487	31.4602	80.5302	-68.4827	1866.7	147.617	69.5998	-78.0177	78.9638	146.334	-134.855	FALSE
F	0	1	FALSE	FALSE	FALSE	2	1193.72	105.019	51.925	-53.0941	54.4579	115.812	-94.7065	1071.48	86.1879	49.1907	-36.9972	44.5707	86.4984	-112.149	1516.76	142	72.2281	-69.7716	76.4495	179.572	-166.776	FALSE
F	0	1	FALSE	FALSE	FALSE	2	994.069	93.3918	54.7337	-38.658	48.5385	101.894	-82.4673	933.735	82.8291	47.9506	-34.8785	57.3547	110.064	-123.234	1716.23	138.081	69.8471	-68.2335	71.5095	148.982	-161.555	FALSE
M	0	1	TRUE	TRUE	FALSE	1	1120.12	103.51	60.9237	-42.5867	58.9535	114.612	-90.7353	912.013	79.3624	41.6516	-37.7107	56.0205	108.216	-100.472	1529.14	146.303	72.1453	-74.1572	105.603	225.883	-239.104	TRUE
M	0	1	TRUE	TRUE	FALSE	1	1363.25	118.057	64.9419	-53.115	56.8971	136.043	-94.487	1033.79	85.116	47.6459	-37.4701	51.0767	101.656	-98.9815	1685.61	144.226	71.7401	-72.486	95.7735	223.086	-203.968	TRUE
F	1	0	TRUE	TRUE	TRUE	1	1117.36	103.275	57.9642	-45.3104	33.2944	106.18	-86.6983	650.082	55.2911	25.9422	-29.3489	24.4392	50.8078	-58.2072	1535.76	135.34	70.3329	-65.0071	59.7108	117.172	-143.815	TRUE
F	1	0	TRUE	TRUE	TRUE	1	1118.83	104.25	62.6104	-41.6395	50.3071	112.518	-95.2737	680.919	57.0523	27.7821	-29.2702	27.5452	60.834	-58.4767	1524.55	132.089	66.7687	-65.3207	70.581	137.761	-141.246	TRUE
F	1	2	FALSE	FALSE	FALSE	3	873.652	76.6436	49.1716	-27.472	28.2918	73.2056	-63.6155	699.692	59.2736	34.3477	-24.9258	23.6702	56.8564	-64.9119	1186.52	117.468	57.2658	-60.2024	42.8655	91.5952	-91.6769	TRUE
F	1	2	FALSE	FALSE	FALSE	3	703.652	66.3051	45.6654	-20.6397	20.1504	49.0118	-52.1517	714.704	62.4657	35.2096	-27.2562	21.3727	42.6253	-54.8968	1234.39	110.216	57.891	-52.3246	33.8375	71.3168	-63.7245	TRUE
F	0	2	FALSE	FALSE	FALSE	0	1673.76	145.926	83.0947	-62.8308	78.3596	178.834	-170.169	1040.46	85.6335	46.1405	-39.493	47.9917	109.016	-92.5506	1788.08	153.437	82.9616	-70.4759	92.9357	193.02	-204.678	FALSE
F	0	2	FALSE	FALSE	FALSE	0	1501.85	141.252	89.7564	-51.4957	98.8061	191.039	-185.673	960.912	78.7498	39.229	-39.5208	53.0305	103.033	-109.71	1764.36	157.015	78.7179	-78.2968	100.476	238.178	-221.967	FALSE
M	2	0	TRUE	FALSE	TRUE	1	1047.28	98.8551	56.2766	-42.5786	52.5742	136.087	-132.369	694.264	61.2226	37.03	-24.1926	32.3817	73.047	-69.7014	1326.21	128.844	73.1051	-55.7391	69.9478	171.982	-191.43	TRUE
M	2	0	TRUE	FALSE	TRUE	1	802.65	79.3416	44.5028	-34.8388	52.3923	136.436	-107.434	613.593	61.4396	36.3105	-25.1292	39.2323	95.1435	-81.2615	1385.25	128.463	71.604	-56.8586	83.6501	188.267	-184.454	TRUE
F	0	2	FALSE	FALSE	FALSE	0	1330.44	114.446	63.6929	-50.7529	36.7119	93.6871	-88.8903	1078.31	87.4975	46.0679	-41.4295	22.9232	66.2316	-77.2029	1745.07	148.246	71.0344	-77.2119	49.8023	137.833	-107.668	FALSE
F	0	2	FALSE	FALSE	FALSE	0	1415.11	125.099	70.5006	-54.5981	40.5243	96.0759	-88.3838	1050.63	82.9053	43.6455	-39.2598	22.1464	80.5165	-81.9558	1833.66	155.879	77.9315	-77.9471	47.3079	138.158	-134.962	FALSE
M	1	2	FALSE	FALSE	FALSE	0	1208.82	105.458	64.2788	-41.179	40.7283	97.395	-79.8404	898.237	72.6594	48.028	-24.6314	25.4602	50.3709	-48.1078	1571.62	134.748	66.5581	-68.1896	64.4105	128.106	-133.782	FALSE
M	1	2	FALSE	FALSE	FALSE	0	1105.82	95.6867	59.4439	-36.2428	40.2997	86.8742	-69.1688	733.317	60.6294	38.6541	-21.9753	23.3838	43.4942	-45.8002	1574.94	135.405	62.7656	-72.6396	63.2	138.133	-128.17	FALSE
F	1	1	FALSE	TRUE	FALSE	0	1088.58	114.297	52.0228	-62.2738	49.0351	102.02	-89.9868	1023.11	88.1591	51.5019	-36.6572	43.8728	94.3072	-98.6319	1474.38	144.123	77.7155	-66.4079	66.0566	123.644	-112.711	TRUE
F	1	1	FALSE	TRUE	FALSE	0	1075.05	105.727	38.4192	-67.3082	51.3888	120.639	-93.763	992.468	88.5333	50.0433	-38.49	41.4911	79.7334	-98.1271	1759.59	143.915	73.1282	-70.787	73.1942	130.704	-150.429	TRUE
F	1	2	TRUE	TRUE	TRUE	3	1242.67	110.378	50.7024	-59.6755	53.9352	106.322	-84.995	849.258	73.8239	39.439	-34.3849	31.2227	60.5037	-57.2699	1523.49	143.404	71.2956	-72.1087	58.0598	105.199	-95.7042	TRUE
F	1	2	TRUE	TRUE	TRUE	3	1265.04	108.839	51.0298	-57.8092	41.7228	78.7563	-79.838	876.596	75.9774	40.4999	-35.4775	26.8236	53.2258	-53.67	1533.6	146.187	67.7467	-78.4401	48.7787	86.2445	-82.9569	TRUE
F	2	2	TRUE	FALSE	FALSE	3	558.412	58.1804	30.3613	-27.819	18.9164	46.5523	-49.1203	323.594	28.1797	24.7146	-3.46513	10.715	31.1354	-27.5221	772.588	76.3756	41.5421	-34.8336	29.0884	66.0871	-69.1582	TRUE
F	2	2	TRUE	FALSE	FALSE	3	493.722	50.8502	32.0379	-18.8123	23.9671	53.7485	-45.9285	440.603	26.7745	23.3184	-3.45614	9.91456	27.3407	-29.8622	660.755	66.7713	39.2191	-27.5521	28.2374	63.9332	-52.0076	TRUE
F	1	1	TRUE	FALSE	TRUE	1	966.253	79.7261	44.5407	-35.1854	13.4351	32.5522	-37.9288	713.607	59.2842	35.5673	-23.7169	11.8382	31.4467	-32.2034	1657.62	134.842	71.0252	-63.8173	25.1307	63.9048	-58.3704	TRUE
F	1	1	TRUE	FALSE	TRUE	1	792.087	70.2699	44.1314	-26.1385	11.0073	21.7988	-26.5407	680.991	56.1186	36.5429	-19.5757	16.1067	38.2561	-36.7956	1483.33	131.802	68.2882	-63.5138	26.4503	77.3585	-51.0522	TRUE
M	1	2	TRUE	FALSE	FALSE	2	1291.91	112.604	58.7613	-53.8426	45.0458	97.7582	-88.1782	621.063	55.429	34.5754	-20.8536	19.9314	48.0922	-57.4727	1673.19	143.707	63.6671	-80.0403	60.9765	173.526	-174.248	TRUE
M	1	2	TRUE	FALSE	FALSE	2	1215.16	108.359	58.3139	-50.0453	37.5514	72.7658	-80.9698	732.097	58.4781	36.0292	-22.4489	21.6341	66.8983	-53.0574	1598.52	136.285	60.2357	-76.0494	56.4451	140.409	-123.835	TRUE
F	1	2	FALSE	FALSE	FALSE	0	1535.39	132.301	75.5497	-56.7516	72.0162	171.51	-120.874	1146.02	98.6335	54.8936	-43.7399	49.0592	90.1316	-93.0786	1812.1	169.797	84.6022	-85.1948	108.901	186.811	-198.063	FALSE
F	1	2	FALSE	FALSE	FALSE	0	1501.9	130.45	77.0164	-53.4339	76.9414	182.531	-113.314	1112.03	96.3351	51.1378	-45.1973	61.9168	128.469	-136.095	1671.22	158.138	77.303	-80.8351	112.921	195.557	-209.749	FALSE
F	1	1	FALSE	FALSE	FALSE	0	1343.79	114.713	54.2501	-60.4627	49.187	119.778	-102.746	834.638	69.4891	36.8573	-32.6318	36.8657	89.9411	-78.9278	1665.09	145.418	69.9388	-75.4792	80.3613	146.57	-159.567	FALSE
F	1	1	FALSE	FALSE	FALSE	0	1146.57	102.207	48.0617	-54.1451	55.4433	119.998	-101.006	668.404	61.786	34.4017	-27.3844	37.3828	71.0102	-69.8026	1587.92	136.948	63.9604	-72.9879	71.2709	119.381	-114.379	FALSE
F	1	1	TRUE	FALSE	FALSE	1	1147.01	103.079	50.8166	-52.2627	54.7235	115.303	-106.393	844.573	67.3932	36.6913	-30.7019	40.5265	83.2266	-101.042	1764.36	153.771	77.6508	-76.1198	88.9297	201.301	-182.578	TRUE
F	1	1	TRUE	FALSE	FALSE	1	1006.15	97.2116	43.3903	-53.8214	56.1466	112.248	-114.884	868.177	69.9513	37.7222	-32.2291	37.4861	64.0543	-102.94	1903.65	150.438	70.3178	-80.1206	86.5297	177.176	-182.865	TRUE
F	1	0	TRUE	FALSE	FALSE	3	1148.75	111.525	53.6968	-57.828	61.894	142.239	-138.866	895.397	72.7785	39.0794	-33.6991	38.8627	95.6488	-96.7568	1662.36	152.438	83.01	-69.4282	80.0751	187.054	-193.062	TRUE
F	1	0	TRUE	FALSE	FALSE	3	1257.98	111.219	58.3809	-52.8382	61.3053	147.346	-133.408	864.729	80.184	45.3345	-34.8494	42.4719	107.244	-98.5743	1768.44	152.281	78.8627	-73.4183	86.6883	216.524	-213.13	TRUE
F	2	2	FALSE	FALSE	FALSE	2	1386.88	118.384	59.761	-58.6232	30.2812	68.5681	-83.5179	894.799	83.3584	37.9648	-45.3936	22.3253	58.184	-56.2986	1843.34	158.758	77.5268	-81.2309	42.6305	103.893	-100.472	TRUE
F	2	2	FALSE	FALSE	FALSE	2	1417.49	120.707	57.9566	-62.7504	27.5134	55.1351	-75.9843	891.818	82.4425	38.2626	-44.1798	23.3216	56.1745	-52.1518	1820.24	154.365	77.3645	-77.0008	43.9671	88.2467	-91.7321	TRUE
M	1	2	TRUE	FALSE	FALSE	1	1733.32	137.956	61.5615	-76.3948	55.8414	136.48	-103.967	1453.64	113.819	59.438	-54.3807	40.2003	83.8002	-79.826	2037.88	161.482	81.9562	-79.5257	63.4458	149.528	-170.046	TRUE
M	1	2	TRUE	FALSE	FALSE	1	1625.03	133.775	62.0781	-71.6969	43.4964	106.904	-110.278	1148.26	92.7504	50.2283	-42.5221	32.8075	55.3655	-65.6981	1748.4	163.928	83.0695	-80.8587	60.9622	137.877	-149.437	TRUE
M	1	2	TRUE	FALSE	FALSE	1	1377.34	119.049	56.6648	-62.3841	63.2967	135.525	-115.2	806.71	73.4157	41.0922	-32.3235	35.9497	62.8769	-69.4485	1678.02	135.376	68.0128	-67.3631	78.7066	155.947	-164.135	TRUE
M	1	2	TRUE	FALSE	FALSE	1	1195.83	111.466	53.0751	-58.3905	66.2874	149.824	-108.985	778.867	70.6697	41.7982	-28.8715	38.105	71.8617	-61.6102	1787.93	146.094	75.1832	-70.9109	78.8329	136.504	-161.877	TRUE
F	2	1	TRUE	FALSE	FALSE	1	1159.76	100.874	56.7241	-44.1503	34.9746	80.713	-96.7118	681.965	59.8966	26.4448	-33.4517	19.396	55.6699	-53.7073	1507.67	132.168	66.1231	-66.0448	54.0771	126.869	-149.574	TRUE
F	2	1	TRUE	FALSE	FALSE	1	1194.7	101.68	60.545	-41.135	28.8297	65.445	-74.9138	696.977	60.3628	28.3693	-31.9936	17.9264	47.7288	-43.7325	1570.81	134.435	60.4792	-73.9559	45.3466	100.472	-111.43	TRUE
F	0	2	TRUE	TRUE	TRUE	2	1363.57	118.567	62.29	-56.2769	45.2111	109.929	-84.5006	1077.06	86.1731	48.7881	-37.385	29.985	65.8526	-70.9376	1866.47	161.713	73.6684	-88.0448	68.7212	157.698	-150.511	TRUE
F	0	2	TRUE	TRUE	TRUE	2	1242.62	111.433	66.8341	-44.5985	44.4428	101.067	-101.924	1060.11	84.4516	49.6308	-34.8208	27.1823	68.3828	-77.0036	1795.96	157.004	72.1946	-84.8095	68.3396	144.145	-150.846	TRUE
F	2	2	TRUE	TRUE	TRUE	1	1144.9	113.492	48.8304	-64.6618	73.2033	167.864	-154.112	792.802	71.4891	40.272	-31.2171	40.2029	105.73	-93.7203	1669.31	144.581	67.6504	-76.9303	120.615	267.458	-284.043	TRUE
F	2	2	TRUE	TRUE	TRUE	1	1237.22	116.246	49.3314	-66.9141	78.5041	178.195	-162.226	812.398	71.293	39.4338	-31.8592	37.1297	105.685	-102.362	1836.55	147.728	68.9364	-78.7914	92.7549	244.013	-252.073	TRUE
F	1	0	FALSE	FALSE	FALSE	2	1633.15	137.81	62.8002	-75.0095	32.3013	69.308	-71.5516	1036.7	82.646	50.6106	-32.0354	23.0378	49.9149	-51.8767	1143.62	146.769	73.6184	-78.7914	40.1554	244.013	-252.073	FALSE
F	1	0	FALSE	FALSE	FALSE	2	1612.97	136.75	66.7774	-69.9725	35.6536	78.7418	-67.6592	1045.11	82.4162	51.8787	-30.5374	23.4751	50.9495	-53.9679	1760.98	151.512	73.5999	-77.912	42.9927	94.3609	-92.7747	FALSE
F	1	1	TRUE	TRUE	FALSE	1	1292.34	116.295	60.2193	-56.0759	64.4882	144.873	-122.752	946.685	82.8024	48.0451	-34.7573	41.0175	84.5206	-76.1163	1887.52	149.792	68.3647	-81.4268	86.7428	209.494	-217.479	TRUE
F	1	1	TRUE	TRUE	FALSE	1	1149.75	113.676	61.7205	-51.9557	55.813	157.251	-139.119	1000.16	86.6129	50.9367	-35.6762	41.466	108.648	-97.7672	1841.29	146.333	66.7249	-79.6083	67.3972	192.348	-170.186	TRUE
F	0	1	FALSE	FALSE	FALSE	3	1388.48	133.555	71.9292	-61.6259	80.3521	158.629	-136.195	1020.78	84.9948	42.1831	-42.8117	60.6166	107.593	-118.53	1547.93	146.296	63.454	-82.8417	117.982	191.983	-182.754	FALSE
F	0	1	FALSE	FALSE	FALSE	3	1453.63	130.577	73.369	-57.2082	92.2352	195.806	-146.004	964.419	81.9122	42.6332	-39.2789	59.5321	104.66	-113.547	1630.92	139.223	64.2438	-74.9787	110.796	182.648	-201.879	FALSE
F	1	2	FALSE	TRUE	FALSE	0	1276.7	111.013	57.8143	-53.1989	33.5267	71.5775	-72.7885	864.02	82.8343	40.5777	-42.2566	28.7241	54.4022	-74.3169	1877.42	160.919	73.7298	-87.1893	56.9605	135.142	-134.462	FALSE
F	1	2	FALSE	TRUE	FALSE	0	1219.53	105.81	59.513	-46.2968	39.5437	94.9911	-72.1196	877.281	84.7659	41.808	-42.958	28.6319	52.7594	-74.9993	1829.38	156.872	71.3394	-85.5324	59.0887	119.493	-133.906	FALSE
F	2	0	FALSE	FALSE	FALSE	1	1191.21	102.787	50.1126	-52.6742	31.021	100.474	-81.597	672.654	70.2813	29.8504	-40.4309	21.8963	65.2285	-65.7838	1428.17	121.322	54.7012	-66.6211	40.1171	106.062	-125.545	FALSE
F	2	0	FALSE	FALSE	FALSE	1	1149.79	98.827	53.5815	-45.2456	31.109	103.669	-86.0563	809.945	70.1699	28.2805	-41.8894	21.3368	68.0913	-70.7102	1435.44	123.465	54.9732	-68.4915	39.697	123.288	-133.731	FALSE
F	0	2	FALSE	FALSE	FALSE	0	1618.53	139.572	63.3955	-76.1767	87.3935	201.263	-175.725	997.53	95.4208	48.1535	-47.2673	67.0383	140.557	-159.223	1487.19	141.67	70.8363	-70.8339	105.925	212.647	-224.626	FALSE
F	0	2	FALSE	FALSE	FALSE	0	1663.12	144.306	60.8926	-83.4133	86.441	196.902	-181.143	1017.8	99.3701	48.1099	-51.2603	66.4363	137.535	-152.683	1721.19	149.75	76.6889	-73.0611	108.936	237.088	-239.484	FALSE
M	1	1	TRUE	FALSE	TRUE	0	1081.94	100.669	46.6144	-54.0543	73.9028	187.751	-146.955	717.894	68.8202	30.0231	-38.7971	55.9108	123.489	-116.112	1347.64	126.177	61.3339	-64.8428	104.307	248.274	-262.004	FALSE
M	1	1	TRUE	FALSE	TRUE	0	967.739	94.7131	43.931	-50.7821	58.1574	140.185	-99.6664	603.425	64.4324	30.0437	-34.3887	43.6	107.76	-87.2922	1305.98	122.483	60.7866	-61.696	80.0233	204.331	-224.785	FALSE
F	2	0	TRUE	FALSE	FALSE	3	667.446	60.2251	39.0579	-21.1672	20.0796	40.4455	-36.3687	693.385	56.1778	34.6577	-21.5201	16.4935	36.5002	-37.8661	1173.24	104.599	56.6026	-47.9965	31.9163	62.4208	-56.5408	TRUE
F	2	0	TRUE	FALSE	FALSE	3	595.589	54.3406	36.4136	-17.927	17.4967	40.7503	-37.3642	639.595	53.8484	35.4261	-18.4223	15.4492	33.6787	-33.1283	980.683	112.366	59.2759	-53.0899	29.9354	55.1676	-81.453	TRUE
F	0	1	FALSE	FALSE	FALSE	1	1576.52	136.025	58.9746	-77.05	74.6456	213.76	-172.886	1179.05	95.1623	53.4544	-41.7079	58.4845	120.412	-124.06	1704.88	150.375	80.2614	-70.1137	92.2555	199.903	-194.737	FALSE
F	0	1	FALSE	FALSE	FALSE	1	1396.97	133.396	56.1257	-77.2705	67.0332	154.715	-164.149	1189.02	95.4753	51.7216	-43.7536	48.0219	106.093	-124.288	1702.82	153.29	83.433	-69.857	70.8326	189.934	-196.003	FALSE
F	1	1	TRUE	TRUE	FALSE	3	938.624	87.4349	49.8149	-37.62	50.2475	116.948	-101.958	998.382	83.1862	48.8669	-34.3193	41.1874	106.465	-108.199	1451.28	124.932	56.7829	-68.1494	62.3401	130.343	-165.466	TRUE
F	1	1	TRUE	TRUE	FALSE	3	901.773	79.6114	50.9404	-28.671	38.3407	103.341	-85.4467	929.255	75.4876	45.8405	-29.6471	36.5848	94.0966	-91.2536	1492.98	128.42	60.5457	-67.8741	66.4135	152.591	-166.315	TRUE
F	2	2	TRUE	FALSE	FALSE	1	1260.29	109.22	59.0704	-50.1498	62.3906	144.008	-126.344	664.376	58.4747	31.2932	-27.1816	38.5369	82.7453	-88.2672	1650.05	141.434	69.1021	-72.3319	82.5027	167.76	-182.772	FALSE
F	2	2	TRUE	FALSE	FALSE	1	1263.2	106.682	64.6287	-42.0537	49.8893	134.44	-120.47	528.054	56.4049	29.5409	-26.864	37.1869	75.1023	-83.0196	1581.15	137.708	64.7883	-72.9195	84.283	189.146	-194.251	FALSE
M	0	2	TRUE	TRUE	TRUE	3	662.396	65.5493	34.928	-30.6212	30.4971	74.095	-58.5739	633.48	62.1856	26.7789	-35.4067	23.086	53.2089	-54.7018	1382.23	124.718	58.0992	-66.6192	46.697	93.3618	-97.2313	TRUE
M	0	2	TRUE	TRUE	TRUE	3	598.412	56.1054	38.6082	-17.4972	35.1181	73.9829	-60.7633	532.868	54.1909	21.4022	-32.7887	22.4271	50.3737	-41.8376	1254.87	114.811	54.0909	-60.7203	58.3118	132.041	-122.125	TRUE
F	1	2	TRUE	FALSE	FALSE	0	1465.87	124.364	64.7307	-59.6333	73.147	182.124	-126.124	1044.82	83.687	45.1584	-38.5286	53.4163	117.127	-111.757	1751.85	148.902	76.4071	-72.4953	99.5368	235.115	-223.868	FALSE
F	1	2	TRUE	FALSE	FALSE	0	1426.38	121.244	64.6342	-56.6095	82.9293	199.219	-169.674	1101.58	88.2797	44.2411	-44.0385	56.4332	130.637	-109.015	1762.84	150.378	74.3391	-76.0391	102.253	222.959	-217.129	FALSE
M	2	2	TRUE	FALSE	FALSE	0	1087.74	93.1889	51.42	-41.7689	16.8173	46.0425	-61.5859	859.07	69.5646	38.697	-30.8676	24.3225	49.4158	-61.9998	1418.15	121.433	65.1265	-56.306	44.9921	90.3656	-83.3082	FALSE
M	2	2	TRUE	FALSE	FALSE	0	1070.07	91.5303	50.1586	-41.3717	21.4873	45.0482	-71.3804	922.134	74.8245	41.5825	-33.242	18.6214	46.3764	-69.1359	1528.08	130.627	72.4347	-58.1921	38.4326	82.4679	-98.7968	FALSE
F	1	2	FALSE	FALSE	FALSE	0	1113.74	109.878	57.4888	-52.3896	104.283	218.057	-207.865	587.493	60.9663	32.0178	-28.9485	40.7981	111.277	-105.612	1317.49	136.699	65.4608	-71.2386	160.67	305.312	-292.719	FALSE
F	1	2	FALSE	FALSE	FALSE	0	1155.3	107.077	56.8677	-50.2092	47.7396	194.34	-153.861	630.927	57.8527	29.8146	-28.0381	29.987	92.6426	-74.7515	1288.71	133.627	60.408	-73.2187	61.8383	188.49	-214.216	FALSE
M	1	2	FALSE	TRUE	FALSE	1	2259.34	66.7597	24.8094	-41.9502	30.7477	90.1371	-74.6945	483.503	43.6555	26.5003	-17.1552	24.3701	65.7662	-79.9819	1191.32	106.635	53.5304	-53.1043	38.9828	91.6485	-79.5854	FALSE
M	1	2	FALSE	TRUE	FALSE	1	753.886	58.2232	20.6509	-37.5723	29.9161	74.3264	-57.9111	390.414	37.2446	22.6795	-14.5651	19.5207	50.9693	-50.0819	1207.98	108.551	49.0586	-59.4925	45.3445	104.792	-114.202	FALSE
F	1	2	FALSE	FALSE	FALSE	0	1636.62	141.731	71.6624	-70.0684	47.1921	115.383	-128.707	1073.39	86.279	40.5301	-45.7489	26.0027	75.2051	-69.122	1843.98	159.15	77.9712	-81.1785	53.4177	113.193	-113.162	FALSE
F	1	2	FALSE	FALSE	FALSE	0	1324.85	132.263	60.6907	-71.5722	46.3235	111.568	-106.27	1088.05	86.3615	43.7719	-42.5896	27.9561	83.0251	-86.8405	1825.21	156.76	75.8399	-80.9205	55.2423	160.265	-133.965	FALSE
F	1	1	TRUE	TRUE	TRUE	2	826.099	72.6489	32.8015	-39.8474	30.2379	77.2386	-67.2833	444.981	41.3546	21.4325	-19.9222	19.9722	54.3312	-51.399	960.517	97.327	48.7989	-48.5281	42.3508	107.106	-101.053	TRUE
F	1	1	TRUE	TRUE	TRUE	2	749.839	75.0937	32.8197	-42.274	36.6849	88.1999	-76.2026	465.725	46.8339	26.0956	-20.7383	26.4017	71.854	-63.7125	1109.71	104.851	52.8684	-51.9822	64.0713	175.41	-136.388	TRUE
F	1	1	TRUE	TRUE	TRUE	3	1247.44	116.381	64.1429	-52.2385	44.7433	130.228	-124.126	1123.85	96.8182	46.0785	-50.7397	38.7001	112.989	-117.541	1897.89	150.993	71.1656	-79.8277	71.4567	271.123	-242.889	TRUE
F	1	1	TRUE	TRUE	TRUE	3	1179.22	111.836	64.1348	-47.7012	48.8899	135.794	-131.383	974.287	87.3869	43.1976	-44.1893	35.0463	103.661	-98.6767	1803.25	142.476	71.4289	-71.0474	66.9856	205.108	-173.303	TRUE
F	0	1	TRUE	TRUE	TRUE	1	1580.2	130.664	64.3238	-66.3398	68.1121	144.492	-119.418	1090.6	87.0046	44.1092	-42.8953	51.8346	114.469	-103.284	1728.08	148.92	81.1529	-67.7667	97.742	197.777	-194.797	FALSE
F	0	1	TRUE	TRUE	TRUE	1	1229.71	108.427	58.8887	-49.5378	58.6693	111.335	-95.0284	1032.42	84.448	44.067	-40.3809	47.6209	94.5502	-86.6863	1700.22	148.57	73.903	-74.6666	90.437	161.488	-147.788	FALSE
F	1	2	TRUE	FALSE	FALSE	3	1174.89	101.323	43.802	-57.5206	51.6207	133.662	-123.462	943.515	74.7576	40.8966	-33.861	30.3968	90.9487	-85.3249	1557.8	133.66	63.0761	-70.5838	74.4647	179.101	-169.026	TRUE
F	1	2	TRUE	FALSE	FALSE	3	1138.64	96.694	43.5069	-53.1871	58.2128	143.186	-118.501	962.101	77.8222	44.52	-33.3022	36.8904	100.506	-89.0408	1514.5	130.704	61.9088	-68.7954	75.7249	168.04	-173.231	TRUE
M	1	1	TRUE	FALSE	FALSE	1	1057.03	93.0804	61.0268	-32.0535	40.7178	94.9077	-72.0043	866.218	76.5714	40.9735	-35.5979	32.6136	79.4125	-74.2535	1588.81	140.138	72.6538	-67.4838	61.2024	112.365	-136.75	TRUE
M	1	1	TRUE	FALSE	FALSE	1	985.642	88.8488	56.1785	-32.6703	27.843	58.3904	-50.0294	772.79	74.2976	35.2696	-39.028	23.4179	50.1527	-59.2893	1662.29	143.063	65.8361	-77.2267	44.5893	103.589	-101.842	TRUE
M	1	2	FALSE	FALSE	FALSE	0	1487.28	127.413	71.1714	-56.242	78.9428	185.123	-165.833	854.594	79.9807	43.9119	-36.0688	43.6909	103.825	-96.3769	1616.54	149.178	74.8157	-74.3619	88.4321	148.761	-173.651	FALSE
M	1	2	FALSE	FALSE	FALSE	0	1155.43	124.876	72.1396	-52.7364	73.5009	163.866	-161.56	867.732	93.6546	47.9504	-45.7042	45.4786	90.8834	-92.8889	1749.29	149.992	70.899	-79.0933	83.939	135.177	-148.473	FALSE
M	1	2	FALSE	FALSE	TRUE	1	1317.83	123.195	53.3384	-69.857	92.5444	181.373	-180.453	1169.84	95.5094	52.8513	-42.6582	59.0828	100.009	-116.267	1853.35	157.075	79.3106	-77.7641	117.897	245.822	-258.113	FALSE
M	1	2	FALSE	FALSE	TRUE	1	1269.58	124.148	51.1398	-73.0081	120.683	207.591	-217.032	948.651	90.8099	50.4679	-40.3419	69.7537	108.707	-118.18	1785.49	155.891	78.3157	-77.5755	150.801	276.154	-283.867	FALSE
F	1	2	TRUE	FALSE	TRUE	2	1252.09	116.476	67.7332	-48.743	76.1612	181.239	-162.948	961.177	84.8531	42.9699	-41.8833	54.4885	111.587	-88.0759	1600.58	137.148	64.4115	-72.7366	88.5274	175.105	-186.619	TRUE
F	1	2	TRUE	FALSE	TRUE	2	1228.48	114.986	67.5959	-47.3897	88.507	203.669	-182.926	1020.77	90.0083	47.2356	-42.7726	58.8003	124.312	-118.082	1525.98	143.407	64.3299	-79.0774	114.908	239.328	-246.77	TRUE
F	1	2	FALSE	FALSE	FALSE	1	1602.31	135.644	70.4883	-65.1554	68.1255	191.485	-172.685	990.934	91.3395	50.9284	-40.4111	39.1364	128.443	-121.124	1953.85	166.543	83.7508	-82.7922	78.7844	177.539	-221.459	FALSE
F	1	2	FALSE	FALSE	FALSE	1	1441.89	133.375	72.1616	-61.2135	59.1907	182.602	-202.07	1109.63	94.7313	53.5387	-41.1926	38.5825	137.424	-119.504	2178.7	170.532	89.854	-80.6782	77.6996	224.495	-248.794	FALSE
F	2	1	TRUE	FALSE	FALSE	1	1144.12	107.705	52.0128	-55.6919	73.5297	169.699	-145.875	769.641	66.0845	36.7348	-29.3496	47.9826	112.362	-106.741	1523.62	129.08	62.1761	-66.9041	89.6245	172.353	-211.672	TRUE
F	2	1	TRUE	FALSE	FALSE	1	1125.69	104.712	49.0877	-55.6239	64.5463	153.736	-115.403	756.892	65.5574	34.9648	-30.5926	50.3253	122.416	-109.999	1521.63	131.03	63.8342	-67.1953	88.6728	157.056	-172.089	TRUE
F	1	0	TRUE	FALSE	TRUE	1	1084.74	101.888	54.8826	-47.005	50.4063	122.194	-116.617	612.708	56.9233	33.5846	-23.3387	34.0394	96.715	-101.137	1372.83	128.133	67.3319	-60.801	89.3769	207.109	-201.799	TRUE
F	1	0	TRUE	FALSE	TRUE	1	1031.33	99.2735	51.126	-48.1474	60.2414	128.933	-144.368	608.301	54.0791	33.9987	-20.0803	33.2768	87.3818	-93.7097	1366.47	128.146	61.2119	-66.9341	93.338	204.438	-240.333	TRUE
F	2	2	FALSE	FALSE	FALSE	0	1272.65	108.54	53.1435	-55.3963	38.7531	137.289	-132.768	854.633	81.3877	41.5203	-39.8674	23.249	86.3146	-88.9993	1301.31	133.261	61.208	-72.0527	49.2174	129.384	-157.015	TRUE
F	2	2	FALSE	FALSE	FALSE	0	1141.6	105.616	48.1174	-57.4985	52.4633	143.588	-133.656	771.65	79.9314	38.7168	-41.2146	22.5365	84.0677	-82.9097	1520.94	132.118	63.081	-69.0369	56.7515	151.609	-160.551	TRUE
F	2	0	FALSE	FALSE	FALSE	0	1149.11	107.637	55.8425	-51.7947	65.1425	170.556	-161.112	867.098	75.4283	39.9515	-35.4768	53.5246	137.799	-129.609	1681.93	145.923	72.6736	-73.2491	95.5642	214.023	-217.41	FALSE
F	2	0	FALSE	FALSE	FALSE	0	1120.45	105.852	59.0495	-46.8029	67.3346	172.16	-144.325	766.131	77.958	42.1223	-35.8357	54.2586	129.934	-133.582	1750.25	148.955	76.1563	-72.7988	107.509	220.473	-257.07	FALSE
M	1	1	FALSE	FALSE	TRUE	0	1232.4	106.936	58.0906	-48.8453	72.1544	170.446	-154.424	657.591	60.8514	32.564	-28.2874	40.6925	101.586	-84.6497	1360.68	126.835	71.3606	-55.4742	86.9998	213.316	-231.965	FALSE
M	1	1	FALSE	FALSE	TRUE	0	1113.58	105.362	56.1071	-49.2549	98.0261	205.013	-186.732	688.313	60.8005	33.4057	-27.3948	52.1449	111.256	-102.103	1435.03	124.366	66.9431	-57.423	98.8315	232.992	-243.985	FALSE
F	1	2	TRUE	FALSE	FALSE	1	1276.49	118.625	59.6162	-59.009	56.6827	184.987	-152.336	1116.29	90.7866	48.4	-42.3866	43.0005	134.445	-124.832	1540.24	134.942	65.247	-69.6952	62.3075	174.78	-169.799	TRUE
F	1	2	TRUE	FALSE	FALSE	1	1418.37	120.843	62.0183	-58.8245	65.4228	175.663	-156.147	1125.48	91.4983	47.2295	-44.2688	42.7614	133.046	-125.593	1597.1	140.077	68.0481	-72.0288	80.9888	218.026	-240.242	TRUE
F	0	2	TRUE	FALSE	TRUE	1	1600.58	135.938	60.9998	-74.9387	48.0367	117.174	-108.8	1348.98	106.187	55.24	-50.9473	37.978	91.5936	-86.782	1793.44	153.385	75.4959	-77.889	70.7193	163.911	-167.63	TRUE
F	0	2	TRUE	FALSE	TRUE	1	1616.36	139.033	64.5529	-74.4803	51.4109	126.539	-113.317	1347.98	106.951	58.7768	-48.1743	39.693	98.4261	-104.09	1816.35	156.086	77.8057	-78.2806	69.5388	147.248	-191.572	TRUE
M	2	2	TRUE	FALSE	TRUE	0	991.48	85.7823	52.1073	-33.675	47.3939	136.394	-101.006	602.528	52.4958	31.1559	-21.3399	35.7796	77.8167	-86.4874	1100.26	101.299	49.0727	-52.2262	61.6737	168.393	-180.549	TRUE
M	2	2	TRUE	FALSE	TRUE	0	976.71	85.8287	53.0941	-32.7346	42.6884	121.44	-118.025	551.801	48.2913	31.3214	-16.9699	29.7948	66.8277	-71.5416	1185.27	99.0187	53.4579	-45.5608	55.3867	152.79	-146.549	TRUE
F	1	0	TRUE	TRUE	TRUE	3	1128.11	96.0529	47.5083	-48.5446	38.319	132.413	-110.989	808.034	67.2104	37.5084	-29.702	18.4483	56.8823	-63.0046	1357.58	115.71	50.1457	-65.5638	45.1322	147.77	-126.858	TRUE
F	1	0	TRUE	TRUE	TRUE	3	1081.29	92.389	47.1401	-45.2489	42.1061	136.118	-100.199	746.876	61.3899	36.4609	-24.9289	20.2515	58.7025	-48.0697	1355.99	116.253	51.1795	-65.073	42.9654	151.208	-145.64	TRUE
F	1	1	TRUE	FALSE	TRUE	1	1130.68	108.28	47.1499	-61.1302	73.8042	191.703	-145.423	700.078	66.5927	34.1184	-32.4744	47.5597	101.749	-109.442	1354.97	128.943	57.5198	-71.4234	98.4718	196.39	-217.032	TRUE
F	1	1	TRUE	FALSE	TRUE	1	1089.13	106.026	54.4	-51.6264	80.0833	180.594	-154.918	732.008	67.3383	33.0319	-34.3064	49.1941	101.797	-110.142	1488.33	128.102	54.8059	-73.2959	92.7889	226.568	-210.63	TRUE
M	1	1	FALSE	FALSE	FALSE	0	1549.57	134.49	65.5699	-68.9198	93.7995	190.504	-182.557	941.389	88.3977	44.7491	-43.6486	62.5924	119.328	-122.343	1853.47	157.244	73.7932	-83.4511	117.012	252.061	-259.711	FALSE
M	1	1	FALSE	FALSE	FALSE	0	1369.05	128.985	63.2937	-65.6916	88.4397	173.6	-180.555	1108.16	87.9312	46.3141	-41.6171	56.3092	98.3403	-124.09	1635.94	153.68	77.4545	-76.2252	117.863	255.893	-250.226	FALSE
F	2	2	TRUE	FALSE	FALSE	1	989.452	88.7634	52.328	-36.4354	25.4489	51.4472	-50.4008	484.006	40.891	27.3043	-13.5867	11.8862	36.8414	-25.5756	1390.78	120.277	59.7387	-60.5384	29.8707	79.4789	-64.0645	TRUE
F	2	2	TRUE	FALSE	FALSE	1	956.708	83.9734	50.9945	-32.9789	29.1679	53.6295	-49.3917	504.184	44.6274	31.0848	-13.5426	13.9586	31.54	-35.5285	1324.1	115.328	58.0176	-57.31	36.3764	83.7604	-93.4336	TRUE
F	1	2	TRUE	FALSE	FALSE	2	1196.1	114.077	54.7926	-59.2842	57.9504	160.187	-138.402	834.592	70.4049	36.1431	-34.2617	36.0983	96.2993	-101.386	1455.5	137.695	57.9641	-79.7309	70.1109	160.399	-168.902	TRUE
F	1	2	TRUE	FALSE	FALSE	2	1146.5	108.938	57.8489	-51.0894	70.2515	176.677	-154.105	746.609	62.0958	30.7477	-31.3481	37.3305	88.869	-100.43	1569.42	134.692	58.039	-76.6534	80.7312	179.034	-171.238	TRUE
F	1	2	TRUE	FALSE	FALSE	0	1258.36	106.765	50.3713	-56.3938	29.7625	91.9156	-100.183	1012.43	81.8222	39.4803	-42.3418	15.9088	41.3574	-46.0017	1619.85	138.709	69.2888	-69.4207	33.4957	69.0088	-79.8851	FALSE
F	1	2	TRUE	FALSE	FALSE	0	1250.14	106.35	51.3721	-54.978	28.885	79.0021	-84.0464	1045.11	84.0317	42.7472	-41.2845	14.7697	41.42	-44.235	1689.08	144.841	71.5939	-73.2476	31.7735	68.9703	-90.469	FALSE
M	0	1	TRUE	FALSE	FALSE	2	1080.52	91.8565	50.1907	-41.6658	30.7666	100.981	-86.89	785.594	64.4527	36.5726	-27.8801	19.7187	59.8539	-57.1272	1366.49	118.958	58.9542	-60.0037	44.1373	106.386	-98.4758	TRUE
M	0	1	TRUE	FALSE	FALSE	2	1116.69	94.6714	47.0649	-47.6066	30.1157	98.5862	-89.0322	708.561	58.6554	33.1086	-25.5469	16.6173	47.9399	-73.1298	1403.75	120.959	59.7345	-61.2243	40.0155	90.4366	-83.213	TRUE
F	2	2	TRUE	FALSE	FALSE	1	1109.29	105.356	52.1566	-53.1993	73.1723	183.111	-194.972	601.807	56.7854	25.8051	-30.9803	50.3183	122.423	-114.408	1328.64	135.324	69.2181	-66.1063	124.404	300.71	-296.919	FALSE
F	2	2	TRUE	FALSE	FALSE	1	1093.57	101.571	59.0789	-42.4924	66.1966	176.141	-178.657	457.574	60.667	25.8051	-30.9803	31.688	122.423	-114.408	1268.1	131.316	63.4813	-67.8343	84.5397	242.259	-241.626	FALSE
F	1	2	TRUE	TRUE	FALSE	0	1176.27	101.424	59.2469	-42.1767	35.9935	94.172	-80.1597	983.497	78.0111	40.0779	-37.9332	39.4662	78.2117	-93.6605	1576.97	136.776	70.3206	-66.4549	64.5243	224.977	-190.265	FALSE
F	1	2	TRUE	TRUE	FALSE	0	1187.4	102.195	65.5256	-36.6694	45.3897	122.769	-94.0216	1032.35	85.1594	43.953	-41.2064	36.5564	80.5565	-80.4247	1502.87	128.074	66.7156	-61.3585	76.8337	205.491	-195.409	FALSE
F	1	1	TRUE	FALSE	FALSE	1	1552.22	133.636	63.8508	-69.7848	67.8419	189.661	-183.189	1047.85	92.5664	43.1419	-49.4244	53.5711	147.927	-140.619	1446.42	147.498	76.2657	-71.2322	103.022	262.715	-261.664	FALSE
F	1	1	TRUE	FALSE	FALSE	1	1362.86	128.385	58.6495	-69.7358	89.4267	217.275	-202.995	1041.62	90.6021	41.0547	-49.5474	64.1394	172.456	-165.192	1440.86	146.838	73.0575	-73.7808	113.633	285.421	-271.38	FALSE
F	2	0	TRUE	FALSE	FALSE	1	1077.32	93.7433	50.5962	-43.1471	29.6947	97.7561	-77.5767	730.196	59.6345	37.5284	-22.1061	25.4957	51.9908	-57.074	1566.56	132.655	60.1562	-72.499	54.3945	131.306	-124.006	TRUE
F	2	0	TRUE	FALSE	FALSE	1	1043.22	91.0157	54.9936	-36.0221	31.2717	86.2771	-75.4419	759.189	62.4888	36.6367	-25.8521	23.9946	49.0639	-52.5391	1535.5	131.438	64.4572	-66.9811	52.2989	94.2635	-114.492	TRUE
M	2	1	TRUE	FALSE	FALSE	2	1148.55	98.2441	53.9094	-44.3347	20.8979	73.0454	-76.9327	673.061	56.1734	35.6735	-20.4999	10.8628	32.2177	-37.2869	1441.62	123.493	62.6112	-60.882	25.1856	80.4522	-82.2012	TRUE
M	2	1	TRUE	FALSE	FALSE	2	1139.13	98.6123	56.7951	-41.8172	17.6227	61.4412	-75.9088	765.368	62.0446	38.8688	-23.1758	11.5058	37.5198	-35.9797	1449.89	124.849	61.3687	-63.4799	27.2536	89.9166	-91.2333	TRUE
M	0	2	TRUE	TRUE	FALSE	2	1482.18	130.508	69.6725	-60.8359	21.0656	42.1329	-46.693	827.793	71.1582	38.0162	-33.142	14.4114	28.4703	-26.4601	1977.11	155.98	80.9492	-75.0308	24.9007	51.072	-48.8233	TRUE
M	0	2	TRUE	TRUE	FALSE	2	1343.43	118.471	56.2151	-62.2556	23.2428	45.2523	-45.3792	926.557	81.6836	46.5238	-35.1597	17.3773	45.5065	-41.3445	2029.62	164.312	83.3073	-81.0044	27.3977	53.4971	-43.9761	TRUE
M	1	2	TRUE	FALSE	FALSE	0	1085.67	93.9488	56.0162	-37.9326	52.0957	126.233	-105.53	952.335	82.0337	46.5248	-35.5089	48.5885	115.252	-115.187	1616.78	131.915	72.1399	-59.775	85.8161	155.416	-173.062	FALSE
M	1	2	TRUE	FALSE	FALSE	0	1095.26	96.2899	58.5086	-37.7814	65.8211	145.06	-116.681	942.72	82.6111	47.9691	-34.642	59.3653	117.042	-136.19	1751.79	141.228	73.161	-68.067	108.672	200.201	-221.629	FALSE
M	2	2	TRUE	TRUE	FALSE	0	936.126	85.4969	52.061	-33.4359	45.355	132.693	-118.243	535.541	47.8245	28.158	-19.6665	30.7782	63.0028	-73.9101	1482.52	127.021	62.8595	-64.1611	71.5501	244.111	-223.054	FALSE
M	2	2	TRUE	TRUE	FALSE	0	853.622	81.096	46.9904	-34.1056	48.7227	127.967	-97.0166	476.958	46.7656	27.0034	-19.7621	29.8846	72.6386	-61.3453	1336.5	124.773	61.3146	-63.4588	66.8252	279.057	-257.647	FALSE
F	0	2	TRUE	TRUE	TRUE	2	1113.91	107.636	54.7727	-52.863	57.5369	137.904	-105.486	764.78	77.9807	37.2565	-40.7242	41.6547	86.4583	-84.6776	1583.2	137.032	67.9034	-69.1287	83.3261	189.752	-183.855	TRUE
F	0	2	TRUE	TRUE	TRUE	2	1043.04	102.908	49.2769	-53.6308	52.1521	126.704	-112.055	709.948	69.3848	32.429	-36.9557	39.0941	78.1847	-75.6769	1513.82	135.122	67.2374	-67.8851	78.6811	150.093	-162.802	TRUE
M	0	2	FALSE	FALSE	FALSE	0	1297.45	120.324	56.7793	-63.5451	59.19	155.727	-143.169	1092.29	91.6455	49.6258	-42.0197	50.2897	111.136	-103.512	1718.36	145.593	74.4157	-71.1772	95.4643	218.938	-209.338	FALSE
M	0	2	FALSE	FALSE	FALSE	0	1420.56	120.38	57.6404	-62.7395	78.2246	178.961	-172.05	1061.48	91.8482	46.5673	-45.2809	61.1451	105.11	-110.427	1579.9	149.949	78.5444	-71.4047	102.591	284.038	-243.462	FALSE
F	1	2	TRUE	FALSE	TRUE	1	1515.18	135.497	57.5994	-77.8976	46.997	123.491	-97.4385	771.621	80.8056	37.0823	-43.7233	33.0317	79.1569	-75.6506	1644.62	156.189	76.6235	-79.5652	53.4662	136.509	-129.851	TRUE
F	1	2	TRUE	FALSE	TRUE	1	1381.39	124.25	59.719	-64.5307	42.2701	110.673	-95.3962	946.247	83.8598	37.0441	-46.8157	31.8387	80.2724	-72.3786	1741.05	164.544	77.1459	-87.3979	59.8709	160.636	-154.466	TRUE
M	1	2	TRUE	FALSE	FALSE	1	1510.84	120.209	60.2254	-59.9834	46.8041	132.76	-95.245	989.777	85.6652	45.659	-40.0062	31.9283	80.1077	-81.2616	1562.47	145.457	70.9316	-74.5253	46.0635	119.257	-133.88	TRUE
M	1	2	TRUE	FALSE	FALSE	1	1312.27	113.031	58.1536	-54.8779	46.6005	113.418	-118.936	838.118	82.9863	42.7824	-40.2038	35.0384	84.0425	-91.3938	1558.05	132.027	64.3587	-67.6682	60.7664	141.058	-180.665	TRUE
M	1	2	TRUE	FALSE	TRUE	0	1115.12	96.8882	49.9658	-46.9224	26.152	71.7921	-82.5688	808.735	69.1851	36.2857	-32.8993	23.1597	59.6343	-61.6011	1631.33	140.147	74.4571	-65.6904	44.5718	121.019	-149.718	FALSE
M	1	2	TRUE	FALSE	TRUE	0	1086.03	91.8815	50.5438	-41.3377	26.8289	62.8293	-73.0769	862.197	68.7939	35.2817	-33.5122	24.1647	68.7786	-76.0562	1677.89	136.561	69.016	-67.5449	55.4858	183.444	-156.819	FALSE
F	2	1	TRUE	FALSE	TRUE	0	1203.84	111.974	48.4493	-63.5244	43.1792	157.473	-144.498	715.388	69.0782	27.8293	-41.2489	26.8943	75.554	-106.855	1647.08	140.549	70.9617	-69.5871	56.953	183.7	-184.465	TRUE
F	2	1	TRUE	FALSE	TRUE	0	1281.52	108.328	49.5598	-58.7682	48.3959	124.391	-122.595	816.994	68.1701	27.4164	-40.7536	28.6062	95.6986	-107.092	1639.59	140.456	69.0682	-71.3878	58.8087	172.005	-194.288	TRUE
F	0	2	TRUE	FALSE	FALSE	2	1554.18	132.766	59.9718	-72.7944	51.1918	122.244	-113.597	1268.97	100.631	51.6677	-48.9628	37.5434	111.509	-96.8954	1797.88	152.741	73.6893	-79.0518	72.7299	152.783	-162.179	TRUE
F	0	2	TRUE	FALSE	FALSE	2	1544.28	130.494	60.3682	-70.1253	55.9522	129.317	-117.416	1302.98	104.058	51.565	-52.4935	39.7249	109.346	-88.6333	1797.39	153.041	71.2617	-81.7798	75.1416	184.19	-172.156	TRUE
F	1	1	TRUE	FALSE	FALSE	2	1341.33	114.838	59.1465	-55.6913	35.5602	123.355	-87.6449	1103.96	88.1083	41.0236	-47.0847	30.53	83.9574	-80.5211	1665.43	141.044	62.9822	-78.0613	48.1896	105.187	-156.731	TRUE
F	1	1	TRUE	FALSE	FALSE	2	1339.52	114.141	61.6559	-52.4848	44.1212	131.137	-104.302	1176.08	94.2481	43.3296	-50.9186	29.7893	84.1159	-102.683	1636.22	140.186	59.2699	-80.9159	51.3242	131.924	-132.615	TRUE
M	1	2	TRUE	FALSE	FALSE	0	1440.43	124.038	63.1569	-60.8815	46.0495	112.937	-99.8224	1139.54	98.2211	50.8486	-47.3725	31.8307	82.7291	-90.8958	2078.43	163.423	78.3107	-85.1124	61.4192	187.913	-206.658	FALSE
M	1	2	TRUE	FALSE	FALSE	0	1415.8	124.895	63.5641	-61.3313	54.9611	160.702	-135.852	1123.02	97.8697	53.148	-44.7217	34.2802	71.4419	-74.4094	1816.78	169.534	82.7019	-86.832	62.3039	140.34	-184.855	FALSE
M	1	1	TRUE	FALSE	FALSE	2	1203.37	115.641	54.0708	-61.5701	67.9103	150.342	-118.418	633.446	62.9826	33.4999	-29.4827	45.1172	82.0782	-86.3994	1452.94	126.984	70.4195	-56.5647	85.8712	151.504	-168.033	TRUE
M	1	1	TRUE	FALSE	FALSE	2	1155.58	101.096	49.3844	-51.712	84.7197	161.555	-131.362	704.082	61.78	35.1682	-26.6118	55.527	104.491	-99.0618	1286.28	124.373	72.1706	-52.2028	104.068	186.984	-204.081	TRUE
F	0	1	TRUE	TRUE	FALSE	1	1330.09	114.819	62.0231	-52.796	33.8963	112.951	-114.874	705.246	67.506	36.2815	-31.2244	19.4176	74.8909	-75.3597	1621.65	139.333	69.9528	-69.3805	43.8759	122.73	-189.525	TRUE
F	0	1	TRUE	TRUE	FALSE	1	1320.23	113.791	62.8691	-50.9217	42.809	110.339	-102.252	857.486	69.8759	37.7557	-32.1202	21.6975	81.3424	-70.8808	1577.92	138.16	72.0263	-66.1341	52.4574	114.209	-131.321	TRUE
F	1	2	FALSE	FALSE	FALSE	0	1375.72	118.658	46.8187	-71.8395	37.2623	117.41	-100.998	1026.02	82.6512	39.0341	-43.6171	31.785	80.3381	-98.1082	1778.92	153.946	74.4873	-79.4582	62.904	141.569	-140.473	FALSE
F	1	2	FALSE	FALSE	FALSE	0	1156.44	109.592	47.2598	-62.3319	47.2403	89.7149	-81.7434	1046.13	84.1378	41.6169	-42.521	42.0469	116.276	-119.619	1661.66	144.86	66.4078	-78.4519	71.0112	141.054	-165.28	FALSE
M	1	1	TRUE	FALSE	FALSE	0	1620.35	140.654	79.1993	-61.4542	55.9513	112.479	-113.82	1394.89	112.804	60.7006	-52.1031	54.4879	106.946	-115.201	1943.17	181.295	90.7477	-90.547	100.37	229.915	-205.625	FALSE
M	1	1	TRUE	FALSE	FALSE	0	1509.22	135.3	75.0042	-60.2958	70.922	144.686	-125.348	1384.79	114.973	59.7988	-55.1743	61.274	118.056	-122.852	1884.01	179.314	87.8301	-91.4837	107.29	232.062	-214.636	FALSE
M	2	2	FALSE	TRUE	TRUE	0	1161.92	111.778	59.2648	-52.5135	95.5526	205.958	-187.494	870.159	75.3967	45.9491	-29.4476	61.4519	134.236	-133.697	1457.75	137.522	69.2033	-68.3186	118.324	259.03	-260.556	FALSE
M	2	2	FALSE	TRUE	TRUE	0	1185.44	111.812	56.291	-55.5206	109.358	218.704	-217.071	857.299	74.5427	45.6618	-28.881	66.1496	135.899	-142.955	1446.97	136.155	68.3954	-67.7598	129.194	279.193	-274.477	FALSE
F	1	1	TRUE	TRUE	FALSE	2	1309.1	114.915	51.694	-63.2214	42.5585	105.583	-86.8287	928.215	76.1734	41.0804	-35.093	24.4782	52.759	-58.4668	1656.41	141.6	70.9356	-70.6646	61.5309	129.391	-136.667	TRUE
F	1	1	TRUE	TRUE	FALSE	2	1354.95	116.408	54.0567	-62.3517	36.3843	81.2514	-81.8234	928.186	72.7646	38.5323	-34.2323	23.7266	49.2542	-53.5009	1645.97	140.663	70.9945	-69.668	52.6879	93.8846	-106.486	TRUE
F	1	0	TRUE	FALSE	FALSE	3	821.15	83.9007	39.4355	-44.4652	42.8575	108.959	-101.774	919.306	73.7491	43.7747	-29.9744	45.064	101.861	-92.2426	1444.1	127.168	58.7628	-68.4054	71.9172	169.563	-147.373	TRUE
F	1	0	TRUE	FALSE	FALSE	3	782.069	74.764	33.5849	-41.1791	63.6864	135.157	-111.706	879.154	76.9968	45.3345	-31.6622	59.7252	137.092	-138.491	1423.43	123.129	59.4954	-63.6337	105.91	181.672	-215.398	TRUE
M	1	2	FALSE	FALSE	FALSE	1	1607.87	140.181	68.876	-71.3052	48.1398	155.763	-113.915	977.397	93.6883	41.3988	-52.2896	35.6714	75.6	-71.6866	2010.35	170.245	87.4951	-82.7501	89.9085	256.089	-228.532	FALSE
M	1	2	FALSE	FALSE	FALSE	1	1554.86	133.406	64.4876	-68.9189	51.8979	111.774	-88.2891	1172.84	94.1741	42.4117	-51.7624	30.4476	64.8439	-79.3864	1953.79	169.003	83.8755	-85.1274	87.3789	205.582	-202.001	FALSE
F	2	1	TRUE	TRUE	FALSE	2	1265.48	101.818	65.771	-36.047	23.0423	64.3737	-66.1173	566.073	56.2879	34.4788	-21.8091	13.6337	39.9504	-45.3416	1417.56	121.895	59.9986	-61.8964	31.2238	75.5813	-77.3307	TRUE
F	2	1	TRUE	TRUE	FALSE	2	1183.49	104.634	68.559	-36.0755	22.9181	59.0479	-66.9416	620.392	52.0068	33.969	-18.0378	14.4009	56.4842	-45.1099	1620.73	128.16	64.529	-63.6314	40.2367	138.633	-139.541	TRUE
M	1	1	FALSE	FALSE	FALSE	0	1162.09	100.896	56.3158	-44.5805	44.1523	121.774	-106.158	1059.64	87.328	47.0832	-40.2447	38.7863	98.0284	-110.636	1600.43	139.338	75.0912	-64.2464	73.5493	204.489	-221.233	FALSE
M	1	1	FALSE	FALSE	FALSE	0	1149.96	101.524	56.2834	-45.2411	51.4295	139.902	-113.062	873.499	83.2021	42.8161	-40.386	49.6306	146.077	-154.312	1626.51	141.04	69.4121	-71.628	77.1587	205.63	-212.871	FALSE
M	0	2	TRUE	FALSE	FALSE	1	1413.79	122.336	71.6473	-50.6892	52.3626	103.063	-109.397	1040.79	84.978	42.8517	-42.1263	47.052	83.5312	-93.971	1914.87	165.645	84.1258	-81.5194	95.3621	184.857	-205.733	TRUE
M	0	2	TRUE	FALSE	FALSE	1	1255.05	116.735	71.1777	-45.5577	62.0082	136.857	-139.03	1063.54	86.8843	46.3848	-40.4995	50.0723	93.8271	-92.9567	1958.71	168.186	84.7752	-83.4112	100.344	222.072	-214.055	TRUE
M	2	2	TRUE	FALSE	TRUE	1	1064.94	91.5531	55.2937	-36.2595	32.3493	96.8668	-83.2607	465.635	48.3839	23.4827	-24.9012	16.3266	41.761	-37.576	1367.21	129.408	62.3766	-67.0318	49.1803	112.001	-142.644	TRUE
M	2	2	TRUE	FALSE	TRUE	1	1133.21	96.4995	54.9986	-41.501	36.6972	110.633	-86.3186	485.898	51.99	15.848	-36.142	13.6182	38.3474	-29.4102	1781.45	140.305	68.6602	-71.6449	47.2785	148.756	-158.739	TRUE
F	1	2	TRUE	TRUE	FALSE	1	1196.45	104.123	52.851	-51.2725	19.7825	72.3697	-48.0714	573.38	53.5176	32.6	-20.9176	12.0762	40.8522	-29.2103	1457.83	124.632	65.6139	-59.0185	27.9707	71.3313	-93.7043	TRUE
F	1	2	TRUE	TRUE	FALSE	1	1219.46	104.203	54.1968	-50.0066	25.4903	61.8695	-71.5099	724.646	58.302	35.6146	-22.6874	13.8397	33.4611	-38.2897	1452.15	122.369	63.7696	-58.5991	36.1231	73.8063	-81.2636	TRUE
M	1	1	TRUE	FALSE	FALSE	0	1300.91	104.761	61.3046	-43.4564	38.0829	117.313	-94.6747	866	76.2972	36.0488	-40.2484	27.6501	73.6002	-80.4137	1966.17	155.99	83.1794	-72.8104	59.222	160.683	-162.271	FALSE
M	1	1	TRUE	FALSE	FALSE	0	1213.13	103.018	61.6887	-41.3294	38.7829	125.497	-86.8761	832.824	72.609	39.3713	-33.2377	25.3601	69.7071	-73.3136	1988.62	157.567	76.8946	-80.6725	61.6054	137.746	-131.827	FALSE
F	0	2	FALSE	FALSE	FALSE	0	1248.25	115.927	60.1876	-55.7394	87.6582	194.338	-170.619	901.743	87.502	44.3752	-43.1267	70.0111	143.78	-158.268	1554.98	144.012	77.5367	-66.4749	126.216	252.921	-243.094	FALSE
F	0	2	FALSE	FALSE	FALSE	0	1261.42	119.413	64.123	-55.2904	100.752	195.867	-175.516	814.306	79.3018	43.0562	-36.2456	72.7059	142.178	-137.382	1468.93	137.034	75.0309	-62.0031	139.103	264.171	-253.324	FALSE
F	2	2	TRUE	TRUE	TRUE	0	830.524	78.4232	45.0996	-33.3236	11.145	35.3889	-24.4235	762.822	63.455	30.1609	-33.2941	10.2917	22.6649	-27.5408	1402.21	113.617	51.3395	-62.277	17.6334	46.3412	-42.2316	TRUE
F	2	2	TRUE	TRUE	TRUE	0	733.033	70.0469	39.3086	-30.7383	12.492	26.9061	-27.697	720.323	65.761	32.8522	-32.9088	9.82437	26.8883	-24.251	1254.72	107.201	51.2066	-55.9943	19.423	39.6615	-37.2616	TRUE
M	0	2	FALSE	FALSE	FALSE	0	1353.34	132.335	59.0445	-73.2903	78.6825	182.154	-157.542	1093.02	98.3538	52.9303	-45.4235	62.2451	152.134	-135.652	1501.06	155.41	78.2273	-77.1828	110.697	288.89	-280.02	FALSE
M	0	2	FALSE	FALSE	FALSE	0	1390.89	131.192	56.71	-74.482	88.2541	223.693	-210.162	1061.72	94.3731	52.7893	-41.5837	65.5386	131.649	-118.629	1447.5	150.906	73.8114	-77.0947	113.797	245.613	-271.103	FALSE
M	1	1	TRUE	FALSE	FALSE	0	1137.14	97.2208	55.4501	-41.7707	50.856	122.543	-98.9891	801.6	70.0502	35.1782	-34.872	47.4881	107.726	-92.5005	1257.96	127.896	61.145	-66.7513	71.9659	168.142	-183.356	TRUE
M	1	1	TRUE	FALSE	FALSE	0	1150.56	98.0317	59.9184	-38.1133	60.1757	121.051	-105.288	833.113	73.7997	36.3299	-37.4698	59.5081	130.853	-127.057	1354.7	126.868	62.7104	-64.1579	99.9038	194.126	-198.235	TRUE
M	1	1	TRUE	TRUE	FALSE	3	1407.83	131.574	59.7852	-71.7884	58.7576	166.931	-148.41	1206.66	105.695	56.8307	-48.8643	53.8687	104.694	-116.481	2116.37	167.366	85.1944	-82.1716	84.5194	221.814	-228.068	TRUE
M	1	1	TRUE	TRUE	FALSE	3	1410.98	131.181	61.318	-69.8628	76.6837	191.306	-165.646	1048.78	99.4768	52.4423	-47.0345	58.9205	118.433	-108.782	2118.7	166.292	82.3268	-83.9647	94.7542	219.199	-251.026	TRUE
M	1	2	TRUE	TRUE	FALSE	0	807.461	76.8128	44.3382	-32.4746	40.6986	104.495	-96.9585	710.831	74.0718	37.9139	-36.1579	47.3887	98.2323	-107.088	1384.31	130.526	65.305	-65.2214	104.872	215.758	-220.076	TRUE
M	1	2	TRUE	TRUE	FALSE	0	832.751	80.2277	47.37	-32.8577	52.0469	128	-104.09	724.291	75.4842	39.614	-35.8702	55.8867	112.372	-112.468	1420.79	136.825	77.3441	-59.4811	103.255	231.063	-239.188	TRUE
M	0	1	FALSE	FALSE	FALSE	2	1228.14	115.291	57.0122	-58.279	67.3323	152.327	-135.871	986.341	86.8346	47.787	-39.0476	53.2582	124.874	-106.53	1509.19	145.438	71.6376	-73.8006	96.2495	223.942	-204.724	FALSE
M	0	1	FALSE	FALSE	FALSE	2	1254.85	111.685	58.9181	-52.7674	72.6185	155.638	-135.713	908.449	79.5883	45.9446	-33.6437	57.4967	120.73	-118.271	1280.6	131.983	66.8734	-65.1097	102.284	223.637	-198.454	FALSE
M	1	0	FALSE	FALSE	FALSE	2	1125.26	106.812	56.4935	-50.3182	59.8544	166.237	-166.342	793.441	80.9284	43.6264	-37.302	55.2536	109.908	-103.636	1666.79	143.048	70.7553	-72.2931	104.698	239.881	-239.269	FALSE
M	1	0	FALSE	FALSE	FALSE	2	1101.18	107.176	61.7445	-45.432	84.7063	189.922	-182.365	910.611	81.1388	43.0914	-38.0474	66.3711	126.529	-119.874	1625.42	139.803	70.8067	-68.996	111.33	227.204	-232.285	FALSE
F	0	2	FALSE	FALSE	FALSE	3	1476.78	128.589	69.2335	-59.3552	68.4965	178.373	-125.192	786.933	86.1745	43.344	-42.8304	63.8745	134.119	-113.649	1736.3	164.1	78.3535	-85.7463	111.587	262.588	-261.341	FALSE
F	0	2	FALSE	FALSE	FALSE	3	1355.67	126.258	64.6242	-61.6339	79.9332	175.472	-173.3	1087.38	90.8753	42.9168	-47.9585	62.637	134.357	-136.233	1942.21	173.353	82.6197	-90.7332	127.108	267.59	-267.911	FALSE
F	0	1	TRUE	TRUE	TRUE	2	1474.47	130.755	66.403	-64.3516	45.5082	119.9	-122.863	888.824	78.219	32.3861	-45.833	34.9931	80.4131	-71.7241	1754.91	164.274	81.2705	-83.0036	69.6391	157.523	-182.476	TRUE
F	0	1	TRUE	TRUE	TRUE	2	1424.85	125.295	72.7104	-52.585	44.2499	125.291	-85.2484	883.776	76.5983	35.9069	-40.6914	31.1628	52.0528	-64.2871	2075.2	163.464	81.1993	-82.265	68.3531	126.727	-147.198	TRUE
F	0	2	FALSE	FALSE	FALSE	0	1639.62	140.238	66.6119	-73.6264	62.3906	129.838	-114.404	1250.15	99.8032	51.0923	-48.7109	43.4685	96.4909	-117.678	1906.34	164.952	81.143	-83.8086	68.3764	133.679	-157.657	FALSE
F	0	2	FALSE	FALSE	FALSE	0	1568.14	136.864	65.5012	-71.3627	65.9993	136.4	-121.569	1037.49	98.3675	50.7295	-47.638	48.7543	111.335	-116.719	1860.78	162.509	82.9607	-79.5487	80.6228	163.894	-188.523	FALSE
M	0	2	FALSE	FALSE	FALSE	0	1311.12	122.325	55.7701	-66.5551	56.7094	121.216	-111.179	996.887	79.8975	43.9036	-35.9939	41.1937	77.66	-93.808	1744.18	150.705	71.6766	-79.0287	84.5047	167.434	-178.917	FALSE
M	0	2	FALSE	FALSE	FALSE	0	1182.09	113.107	53.9724	-59.1347	58.0593	135.603	-103.312	981.009	79.4892	43.6084	-35.8807	42.3579	77.8365	-76.0811	1592.48	150.04	65.6979	-84.3416	95.2438	182.489	-189.149	FALSE
M	1	1	TRUE	FALSE	FALSE	0	1129.53	105.23	46.6237	-58.6064	32.7591	122.007	-124.122	937.618	82.685	42.2103	-40.4747	20.799	87.2348	-86.8248	1819.09	141.879	65.1602	-76.7186	40.2455	123.823	-138.198	TRUE
M	1	1	TRUE	FALSE	FALSE	0	1212.49	103.447	51.036	-52.4112	26.825	83.2712	-91.3718	983.742	87.6555	43.8422	-43.8134	17.7571	81.5728	-62.2974	1824.41	154.491	71.219	-83.2718	36.7232	112.625	-115.233	TRUE
M	1	2	TRUE	FALSE	FALSE	0	1221.72	104.024	45.3287	-58.6957	26.3756	60.2221	-57.549	862.896	69.179	39.5124	-29.6666	19.8094	42.6054	-45.1568	1504.88	129.512	62.2674	-67.245	41.3883	76.6317	-80.2756	TRUE
M	1	2	TRUE	FALSE	FALSE	0	1158.88	98.7559	49.318	-49.4379	22.2178	51.0435	-46.3628	829.054	67.9921	38.5583	-29.4338	18.5388	44.1747	-37.5176	1458.5	123.894	61.1105	-62.7834	36.9054	69.9017	-69.6593	TRUE
M	1	1	TRUE	FALSE	TRUE	0	896.694	84.4991	46.2444	-38.2547	36.0408	89.5349	-79.5416	655.332	60.3643	32.4033	-27.961	22.5355	48.8019	-55.8029	1293.11	114.037	56.1203	-57.9165	46.7165	131.443	-135.483	TRUE
M	1	1	TRUE	FALSE	TRUE	0	679.246	74.2098	42.3597	-31.8501	36.5186	80.6305	-72.9256	500.341	51.5897	29.2787	-22.311	21.2369	54.1186	-51.1199	1068.92	98.794	47.1819	-51.6122	51.3905	136.716	-126.048	TRUE
M	1	1	TRUE	TRUE	FALSE	0	1194.92	101.759	46.3265	-55.4322	43.0448	99.5317	-94.0345	913.54	75.8464	44.513	-31.3334	26.9005	89.2758	-92.6737	1576.45	137.919	68.8179	-69.1009	64.2925	154.315	-196.376	FALSE
M	1	1	TRUE	TRUE	FALSE	0	1118.8	98.6285	48.9005	-49.728	45.8523	106.152	-100.684	878.702	70.3055	41.6038	-28.7017	23.2954	66.2717	-66.8357	1586.83	135.8	61.3895	-74.41	56.8348	120.849	-169.635	FALSE
M	1	1	FALSE	FALSE	FALSE	0	1014.37	86.7164	50.0468	-36.6696	53.727	122.083	-125.317	606.457	53.3992	33.0878	-20.3114	32.8881	87.6277	-88.2866	1456.2	125.904	64.3429	-61.5612	78.9695	187.569	-201.526	FALSE
M	1	1	FALSE	FALSE	FALSE	0	1012.46	85.959	47.7334	-38.2256	55.6295	147.039	-123.813	585.275	52.7985	33.4941	-19.3045	33.4826	94.0952	-90.1958	1345.06	126.058	62.0775	-63.9802	81.8161	197.463	-200.623	FALSE
M	0	2	FALSE	TRUE	FALSE	0	1221.73	107.026	58.3785	-48.6476	35.1071	87.3918	-74.6045	929.955	82.2283	43.6548	-38.5736	22.6818	71.5346	-63.4407	1602.2	129.215	64.0892	-65.1263	47.0681	106.693	-98.489	FALSE
M	0	2	FALSE	TRUE	FALSE	0	1301.2	115.706	64.3277	-51.3784	30.8927	86.8518	-68.7934	931.957	84.068	40.3385	-43.7295	21.2001	69.9471	-67.832	1525.82	134.681	68.0032	-66.6777	40.6236	104.68	-106.967	FALSE
F	2	2	TRUE	TRUE	FALSE	0	1057.29	99.0909	62.9381	-36.1528	39.6881	87.9731	-136.216	650.897	58.6207	29.0974	-29.5233	33.9716	76.6578	-81.1043	1516.37	131.95	62.6704	-69.2801	71.2582	176.499	-161.001	TRUE
F	2	2	TRUE	TRUE	FALSE	0	1000.65	97.2797	66.5376	-30.7421	63.6545	155.423	-128.006	692.519	65.2558	34.1343	-31.1214	48.7689	123.398	-102.796	1376.66	130.731	64.1227	-66.6087	108.913	265.863	-237.961	TRUE
M	0	2	FALSE	FALSE	FALSE	2	1423.43	123.121	66.2861	-56.8348	79.0792	184.265	-135.57	1267.87	103.475	57.6775	-45.7973	64.1636	132.777	-141.905	1907.88	162.892	82.1463	-80.7462	106.704	257.088	-257.13	FALSE
M	0	2	FALSE	FALSE	FALSE	2	1341.82	127.893	65.8533	-62.0393	86.2352	177.551	-160.409	1248.93	99.8496	52.1225	-47.7271	53.833	132.316	-128.266	1789.08	168.71	87.0908	-81.6196	110.985	265.992	-288.933	FALSE
M	1	0	TRUE	FALSE	FALSE	0	924.363	81.4216	61.7664	-19.6552	15.5932	100.616	-84.5814	861.331	74.1878	41.2016	-32.9863	26.3243	95.6384	-109.63	1584.35	125.681	64.4943	-61.1871	25.922	132.985	-147.265	FALSE
M	1	0	TRUE	FALSE	FALSE	0	937.132	80.9726	62.3057	-18.6669	50.9311	154.618	-122.422	978.556	83.4282	47.309	-36.1192	46.2456	121.176	-136.792	1413.15	123.295	64.8266	-58.4686	85.3352	250.427	-261.592	FALSE
F	0	0	TRUE	TRUE	FALSE	2	1085.1	105.247	49.8615	-55.3851	55.7032	133.481	-103.148	936.649	74.751	39.1736	-35.5774	46.5531	96.5105	-96.5192	1479.4	128.388	66.6856	-61.7024	75.0204	177.717	-156.998	TRUE
F	0	0	TRUE	TRUE	FALSE	2	923.855	88.874	40.1177	-48.7563	54.6013	119.543	-99.4754	907.709	74.3146	35.882	-38.4326	51.5744	106.445	-100.732	1409.63	123.563	61.3713	-62.1919	81.1997	156.892	-168.017	TRUE
F	1	2	TRUE	TRUE	FALSE	0	1244.52	107.669	61.0942	-46.5746	64.6838	165.225	-135.152	1004.63	79.8798	46.703	-33.1768	50.0313	108.77	-108.231	1608.72	137.77	70.0982	-67.672	88.1973	189.125	-211.822	TRUE
F	1	2	TRUE	TRUE	FALSE	0	1099.83	104.782	59.4252	-45.3568	65.7791	165.508	-135.683	915.232	81.1181	47.6012	-33.5169	51.6497	117.348	-111.617	1423	132.234	65.8321	-66.4019	85.5168	193.173	-206.191	TRUE
F	1	2	TRUE	FALSE	FALSE	0	1152.01	102.2	53.7907	-48.4095	36.1359	76.1468	-83.9903	1052.04	85.0726	48.9336	-36.139	20.0008	64.6523	-74.7691	1772.34	153.421	73.5566	-79.8641	61.2842	137.362	-133.627	TRUE
F	1	2	TRUE	FALSE	FALSE	0	1046.71	95.1431	54.2718	-40.8713	32.5875	67.3929	-82.4853	1022.12	82.1521	46.6086	-35.5435	17.2074	62.5664	-57.7384	1771.67	152.894	72.634	-80.2605	47.0687	110.712	-130.99	TRUE
F	1	0	TRUE	FALSE	FALSE	3	916.956	112.457	70.3113	-42.1462	21.9368	66.6713	-38.8579	1126.01	91.1979	50.8161	-40.3818	30.8665	66.0337	-62.8554	1749.22	153.894	78.7351	-75.1588	70.0811	127.259	-134.075	TRUE
F	1	0	TRUE	FALSE	FALSE	3	1304.76	79.8347	30.6584	-49.1763	22.5894	60.0871	-51.2908	964.62	84.1249	45.0874	-39.0375	33.0802	70.5936	-63.718	1776.52	155.479	81.5421	-73.9365	73.4099	135.335	-135.662	TRUE
M	1	0	TRUE	TRUE	TRUE	2	1186.45	101.458	56.0977	-45.3607	33.44	92.4148	-85.3134	1016	89.4756	44.0993	-45.3763	33.8215	94.1276	-99.2991	1528.2	141.853	66.0301	-75.8226	44.27	159.142	-181.045	TRUE
M	1	0	TRUE	TRUE	TRUE	2	1169.8	100.118	55.5105	-44.6071	45.2011	126.876	-115.893	940.133	82.6801	41.8969	-40.7832	34.1618	91.7252	-76.6082	1418.16	144.109	69.8828	-74.2258	52.9954	163.445	-150.936	TRUE
F	1	2	TRUE	TRUE	TRUE	2	1197.09	102.685	60.626	-42.0589	38.467	95.5674	-85.7044	711.911	57.3775	35.0001	-22.3774	29.9122	69.0604	-74.9545	1521.16	130.485	67.1237	-63.3614	67.1892	156.933	-168.951	TRUE
F	1	2	TRUE	TRUE	TRUE	2	1228.46	105.007	58.7785	-46.2287	48.3647	128.907	-103.985	651.868	56.5716	36.8785	-19.6931	34.3812	69.4299	-83.7976	1537.16	130.614	67.7336	-62.8804	76.7047	177.606	-197.566	TRUE
F	1	1	TRUE	TRUE	FALSE	3	813.345	85.8954	45.287	-40.6084	28.5184	66.9485	-58.8401	730.724	66.1534	32.883	-33.2704	17.7705	46.8635	-33.8764	932.649	97.658	47.3594	-50.2986	29.5891	65.7283	-61.5288	TRUE
F	1	1	TRUE	TRUE	FALSE	3	553.753	60.645	32.885	-27.7599	13.9274	30.5054	-28.1821	640.162	58.1468	29.5107	-28.6361	14.9152	32.2818	-26.9039	931.564	88.2505	43.2354	-45.0151	22.4582	42.6207	-40.7033	TRUE
F	1	0	TRUE	TRUE	FALSE	3	558.422	59.1231	33.8901	-25.233	18.9167	46.0653	-45.4225	480.476	48.6286	25.4224	-23.2062	18.2275	45.8183	-44.3461	740.345	78.275	35.1036	-43.1714	24.006	54.713	-54.3921	TRUE
F	1	0	TRUE	TRUE	FALSE	3	489.199	46.706	26.2086	-20.4974	13.9135	23.8106	-38.3752	454.104	37.8612	21.6706	-16.1906	13.0041	33.2915	-34.3837	787.808	73.3283	30.4218	-42.9065	18.1858	46.8507	-58.3952	TRUE
F	1	2	TRUE	TRUE	TRUE	2	1334.94	118.443	59.5516	-58.8916	52.8897	182.037	-154.506	1108.45	87.9539	47.5092	-40.4446	34.424	85.8764	-109.503	1420.82	124.324	64.5658	-59.7578	44.9057	148.965	-145.384	TRUE
F	1	2	TRUE	TRUE	TRUE	2	1202.39	114.105	62.7165	-51.3887	45.1347	157.17	-125.259	988.234	79.8313	40.3134	-39.5179	28.1388	84.675	-79.7756	1392.45	118.146	60.0234	-58.1229	51.6487	142.686	-154.682	TRUE
F	1	1	TRUE	TRUE	TRUE	3	604.311	65.3373	39.2473	-26.0899	23.207	49.6026	-45.0932	881.617	74.0385	37.7965	-36.242	30.5692	69.3013	-70.3726	1367.66	121.889	62.6562	-59.233	50.8803	94.6932	-96.1296	TRUE
F	1	1	TRUE	TRUE	TRUE	3	761.809	71.6154	44.7794	-26.836	28.5964	60.76	-54.9171	745.62	62.2305	30.503	-31.7275	25.8537	43.654	-50.0581	1214.46	110.656	53.2089	-57.447	51.0276	92.4462	-114.741	TRUE
F	1	2	TRUE	FALSE	FALSE	0	1135.39	107.487	57.8193	-49.6682	59.0119	129.196	-154.9	925.908	77.0045	38.9021	-38.1024	38.0719	93.3112	-95.5101	1719.36	146.361	74.5375	-71.8231	77.5884	180.159	-189.266	TRUE
F	1	2	TRUE	FALSE	FALSE	0	1140.84	105.991	61.8765	-44.114	63.8052	152.362	-169.664	876.414	70.6843	36.9087	-33.7756	47.6312	110.715	-115.815	1679.02	144.834	73.7515	-71.0827	78.7533	171.76	-178.947	TRUE
F	0	2	FALSE	FALSE	FALSE	1	1233.13	126.407	84.2985	-42.1082	65.8723	154.442	-141.532	735.419	77.4546	37.1429	-40.3117	61.0813	112.381	-116.114	2038.48	162.424	81.2695	-81.1545	119.349	240.908	-273.191	FALSE
F	0	2	FALSE	FALSE	FALSE	1	1310.76	122.78	73.9969	-48.7832	81.1112	159.643	-142.007	718.032	78.557	39.2772	-39.2798	63.6553	107.428	-117.802	1787.11	165.571	81.1447	-84.4264	128.754	239.308	-256.316	FALSE
M	0	2	FALSE	FALSE	FALSE	0	1193.34	125.382	58.4003	-66.9813	78.7164	139.197	-156.096	1088.22	103.616	48.2928	-55.3234	52.3182	103.497	-111.983	1723.98	147.448	71.914	-75.5337	86.0271	170.592	-184.082	FALSE
M	0	2	FALSE	FALSE	FALSE	0	1311.73	125.405	60.4836	-64.9219	85.3991	170.56	-174.864	1165.92	101.037	48.5836	-52.4533	59.2441	127.188	-127.692	1792.99	154.409	79.4634	-74.9457	101.643	199.86	-233.956	FALSE
F	1	2	TRUE	TRUE	FALSE	1	1133.1	102.907	60.3732	-42.5335	50.6754	103.877	-101.701	692.005	67.0488	30.7665	-36.2823	27.8137	64.5736	-72.8679	1297.09	120.438	70.5183	-49.9193	54.4081	143.442	-141.53	TRUE
F	1	2	TRUE	TRUE	FALSE	1	1039.51	91.513	47.3747	-44.1383	51.3591	96.069	-90.253	688.691	68.3465	31.198	-37.1485	28.3179	57.9196	-75.0144	1578.66	127.067	53.1556	-73.9111	58.4689	142.742	-149.303	TRUE
M	2	1	TRUE	TRUE	TRUE	0	839.63	71.3849	42.8665	-28.5184	23.2972	62.8562	-67.2642	578.687	53.1083	24.497	-28.6113	16.2919	47.3382	-35.3202	1175.16	115.205	57.4219	-57.7832	38.9643	87.6419	-78.647	TRUE
M	2	1	TRUE	TRUE	TRUE	0	645.646	70.9782	40.8859	-30.0923	23.4951	51.9317	-56.4381	558.183	51.6128	23.5285	-28.0843	16.7121	36.7277	-37.6121	1105.48	110.535	60.0434	-50.4917	36.8004	82.3173	-86.2413	TRUE
M	1	1	TRUE	TRUE	FALSE	0	991.059	97.6992	57.6869	-40.0124	72.4458	145.58	-131.054	857.764	70.8552	36.2219	-34.6333	38.4993	93.9503	-88.0642	1602.72	138.188	66.1835	-72.0046	91.4796	207.568	-225.763	TRUE
M	1	1	TRUE	TRUE	FALSE	0	1050.58	101.243	57.5271	-43.7162	72.354	160.694	-138.701	747.389	71.5354	34.5914	-36.9439	42.0827	92.8624	-93.531	1586.26	140.258	66.7117	-73.546	95.7884	210.85	-236.552	TRUE
M	1	1	TRUE	TRUE	TRUE	0	822.131	75.5276	52.7254	-22.8021	31.1413	76.477	-70.0427	660.607	59.0769	22.1162	-36.9606	22.5002	68.5404	-66.6903	1443.81	120.805	53.6723	-67.1329	49.3103	138.64	-104.996	TRUE
M	1	1	TRUE	TRUE	TRUE	0	831.963	73.338	53.2393	-20.0987	30.4525	74.9304	-65.5158	582.066	63.3918	23.5374	-39.8543	22.9521	57.0806	-57.2075	1331.33	108.379	48.3615	-60.0174	48.9459	113.12	-89.0778	TRUE
F	0	2	TRUE	TRUE	FALSE	0	750.311	79.4432	41.1578	-38.2854	20.148	60.3022	-54.6824	981.103	84.4301	40.5326	-43.8975	24.9772	64.7096	-74.9384	1500.68	139.001	61.2852	-77.7155	43.5737	122.123	-112.494	TRUE
F	0	2	TRUE	TRUE	FALSE	0	1033.77	96.3998	53.3575	-43.0423	28.4316	64.962	-50.3999	995.808	81.7236	39.8412	-41.8823	23.0298	72.4805	-57.6778	1519	138.651	60.839	-77.8122	46.3109	112.201	-98.5953	TRUE
F	1	0	TRUE	FALSE	TRUE	0	1299.96	114.387	79.0496	-35.3374	44.5803	107.349	-111.711	922.66	80.7482	41.9862	-38.762	31.2131	102.705	-91.1631	1739.04	147.69	82.1019	-65.5876	64.9867	175.261	-175.212	TRUE
F	1	0	TRUE	FALSE	TRUE	0	1302.52	110.57	81.0703	-29.4999	52.3522	118.231	-142.575	845.154	83.826	42.9005	-40.9255	33.9147	87.0444	-95.6124	1601.75	147.535	77.7003	-69.8352	69.16	212.086	-186.161	TRUE
F	1	1	TRUE	TRUE	FALSE	0	1008.82	89.8008	57.0982	-32.7026	24.3912	62.4988	-70.0234	678.323	58.3617	33.2249	-25.1368	17.8506	62.0615	-58.9255	1189.58	105.36	55.3914	-49.9687	41.1904	94.6217	-95.1171	TRUE
F	1	1	TRUE	TRUE	FALSE	0	932.961	84.6324	58.9939	-25.6386	39.4654	66.9059	-86.7373	602.226	57.2818	27.2388	-30.043	31.1067	74.096	-66.2038	1168.52	106.895	50.7388	-56.1561	56.8347	114.442	-115.355	TRUE
M	1	2	FALSE	TRUE	FALSE	0	551.199	61.351	43.8761	-17.4749	24.476	54.8433	-45.011	350.783	33.4045	18.2883	-15.1163	15.9737	44.6132	-43.8349	864.482	83.9936	64.4785	-19.5151	47.6037	108.317	-96.2641	TRUE
M	1	2	FALSE	TRUE	FALSE	0	646.674	66.1519	53.3177	-12.8342	36.5766	98.1598	-75.6166	418.891	41.5805	18.2813	-23.2992	19.3931	42.3466	-37.8317	1139.08	81.92	82.8749	0.95493	51.5889	107.639	-119.5	TRUE
M	1	2	TRUE	FALSE	FALSE	0	1021.33	99.2527	62.075	-37.1777	45.923	86.3625	-88.2985	880.529	84.4918	38.5794	-45.9124	37.3739	66.048	-64.7153	1769.98	151.192	102.75	-48.4417	73.1398	204.341	-206.793	TRUE
M	1	2	TRUE	FALSE	FALSE	0	852.405	81.1135	53.058	-28.0556	34.9346	63.8868	-61.3219	872.081	77.1923	36.1388	-41.0536	32.6378	52.8723	-51.3605	1868.87	153.029	59.3166	-93.7122	61.8831	123.962	-123.034	TRUE
M	1	1	TRUE	TRUE	FALSE	0	1060.92	93.1523	46.8817	-46.2705	40.5549	93.8681	-74.2774	649.385	61.9663	26.4782	-35.4881	29.5713	58.7987	-55.8435	1357.01	129.593	70.9547	-58.6384	66.2602	144.535	-135.318	TRUE
M	1	1	TRUE	TRUE	FALSE	0	944.206	91.8685	42.6268	-49.2417	47.8807	99.7279	-81.6897	695.843	66.2954	39.6923	-26.603	33.1354	58.4128	-65.322	1133.71	127.864	66.2687	-61.5956	73.4266	152.687	-142.825	TRUE
