# Supplementary material
Source: MDPI journal article supplement (https://www.mdpi.com/2076-3417/10/17/5942)
Supplement: s1 [file s1 › 4. Report for physician. Supplementary material.pdf]

# CERVICAL PAIN ASSESSMENT REPORT

## MOTION CAPTURE TEST

Clinical history number: 245627

Last name, First name: De la Torre, Juan

Motion Capture Date: 02 january 2019

Gender: Male

Birth date: 24 january 1990

### Clinical Information

The patient suffered a traffic accident 5 months ago. It has been observed that the patient has some contractures in the cervical area, and a spinal column alteration. The patient reports a high frequency of pain (two pain crises per day) and feeling of instability. No cervical surgery reported.

### Cervical Pain Prediction

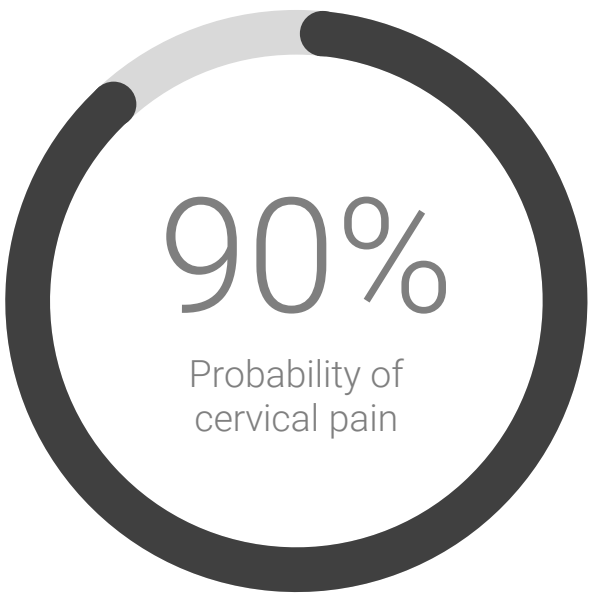

### Main ranges and velocities

|                        | Flexo<br>Extension | Rotation | Lateralisation |
|------------------------|--------------------|----------|----------------|
| Total<br>Range<br>[°]  | 56.11              | 114.81   | 54.19          |
| Mean<br>Speed<br>[°/s] | 35.12              | 58.32    | 22.43          |

Cervical movement assessment test performed using MH-sensor system.  
Results based on a database of 302 samples (151 patients evaluated twice).
